# Supplementary material for: Systematic Analysis of Gene Expression in Lung Adenocarcinoma and Squamous Cell Carcinoma with a Case Study of FAM83A and FAM83B
Source: Cancers (Basel). 2019 Jun 25;11(6):886. doi: 10.3390/cancers11060886 (PMC6627508; doi:10.3390/cancers11060886)
Supplement: Supplementary file 1 [file cancers-11-00886-s001.zip › Cancers-531753 - Supplementary Tables.xlsx]

## Sheet: S1_AD_SMD
EntrezID	Symbol	SMD	SMD.lower	SMD.upper	pv	p.adj
1	A1BG	0.618565	0.24001	0.99712	0.00136187	0.00298758
2	A2M	-1.93471	-2.21264	-1.65679	2.2e-42	1.59e-40
9	NAT1	0.291718	0.12489	0.458547	0.000609807	0.00142374
10	NAT2	0.251593	0.0846825	0.418503	0.00313318	0.00639431
12	SERPINA3	-0.178154	-0.344704	-0.0116037	0.0360364	0.058537
13	AADAC	-1.17482	-1.45299	-0.896647	1.26e-16	1.41e-15
14	AAMP	1.08753	0.913718	1.26134	1.42e-34	6.41e-33
15	AANAT	0.249248	0.0101835	0.488313	0.0410076	0.0657272
16	AARS	1.02074	0.223848	1.81762	0.0120552	0.0217792
18	ABAT	0.0559613	-0.199991	0.311913	0.668268	0.732291
19	ABCA1	-0.542778	-0.883298	-0.202258	0.00178338	0.00382069
20	ABCA2	0.352462	0.185353	0.51957	3.57e-05	0.000103172
21	ABCA3	-1.97424	-2.40583	-1.54266	3.08e-19	4.31e-18
22	ABCB7	0.48983	0.298616	0.681044	5.15e-07	1.96e-06
23	ABCF1	0.801457	0.582404	1.02051	7.45e-13	5.72e-12
24	ABCA4	0.891913	0.719958	1.06387	2.81e-24	6.08e-23
25	ABL1	-0.09335	-0.259769	0.0730686	0.271588	0.347859
26	AOC1	1.14871	0.961061	1.33636	3.64e-33	1.47e-31
27	ABL2	0.168993	-0.112889	0.450875	0.239983	0.31279
28	ABO	0.32235	0.0321394	0.612562	0.0294791	0.0489143
29	ABR	-0.521992	-0.689895	-0.354088	1.11e-09	6e-09
30	ACAA1	-0.650071	-0.915354	-0.384787	1.56e-06	5.59e-06
31	ACACA	0.416824	-0.0444799	0.878128	0.076564	0.114993
32	ACACB	-1.75484	-2.44272	-1.06696	5.73e-07	2.17e-06
33	ACADL	-2.62775	-3.17244	-2.08306	3.22e-21	5.37e-20
34	ACADM	-0.232378	-0.602934	0.138177	0.219031	0.289245
35	ACADS	-0.139697	-0.485039	0.205645	0.427871	0.510533
36	ACADSB	-0.425907	-0.984352	0.132538	0.134967	0.189792
37	ACADVL	-0.0442076	-0.239528	0.151113	0.657328	0.722989
38	ACAT1	-0.873	-1.13958	-0.606418	1.38e-10	8.28e-10
39	ACAT2	-0.407029	-0.625749	-0.188308	0.000264907	0.000661595
40	ASIC2	0.157768	-0.00872204	0.324258	0.0632705	0.0969276
41	ASIC1	0.677184	0.414951	0.939417	4.16e-07	1.61e-06
43	ACHE	0.821183	0.650279	0.992088	4.62e-21	7.62e-20
47	ACLY	0.904588	0.644234	1.16494	9.77e-12	6.67e-11
48	ACO1	-0.109057	-0.520564	0.30245	0.603464	0.675947
49	ACR	-0.87739	-1.96893	0.214146	0.115154	0.164971
50	ACO2	-0.214612	-0.391086	-0.0381373	0.0171477	0.0299653
51	ACOX1	0.46339	0.204059	0.722721	0.000461445	0.00110181
52	ACP1	1.00187	0.678259	1.32549	1.3e-09	7e-09
53	ACP2	0.321284	-0.410031	1.0526	0.389206	0.472098
54	ACP5	-1.62991	-1.97853	-1.28129	5.03e-20	7.52e-19
55	ACPP	-0.261839	-0.490872	-0.0328061	0.0250452	0.0421763
56	ACRV1	0.595555	0.277484	0.913626	0.000242709	0.000609324
58	ACTA1	-0.0253519	-0.253158	0.202454	0.827337	0.865492
59	ACTA2	-0.415002	-0.67386	-0.156144	0.00167673	0.0036116
60	ACTB	0.241467	-0.654677	1.13761	0.59742	0.670533
69	ACTBP9	0.201895	-0.105284	0.509074	0.197677	0.264834
70	ACTC1	-0.332909	-0.55523	-0.110588	0.00333655	0.00676558
71	ACTG1	0.769655	0.258193	1.28112	0.00318409	0.00648818
72	ACTG2	-1.31158	-1.6418	-0.981355	7e-15	6.58e-14
81	ACTN4	-0.282902	-0.546184	-0.0196191	0.0352031	0.0573056
86	ACTL6A	1.43591	1.02999	1.84183	4.11e-12	2.93e-11
87	ACTN1	0.217846	-0.0938722	0.529565	0.17077	0.23332
88	ACTN2	-1.3144	-2.06464	-0.564162	0.000595165	0.00139263
89	ACTN3	0.0738574	-0.486115	0.63383	0.796014	0.839412
90	ACVR1	0.41888	-0.0176718	0.855431	0.0600231	0.092489
91	ACVR1B	0.826802	0.656236	0.997367	2.08e-21	3.56e-20
92	ACVR2A	-0.331855	-0.716415	0.0527058	0.0907715	0.133626
93	ACVR2B	0.81534	0.528383	1.1023	2.56e-08	1.16e-07
94	ACVRL1	-2.59748	-3.5671	-1.62785	1.52e-07	6.21e-07
95	ACY1	1.01126	0.754258	1.26826	1.24e-14	1.14e-13
97	ACYP1	0.2376	-0.0870738	0.562275	0.15148	0.210147
98	ACYP2	-0.8853	-1.52982	-0.24078	0.00709895	0.0134914
100	ADA	0.54129	0.269006	0.813574	9.77e-05	0.000262645
101	ADAM8	1.25121	0.955655	1.54677	1.06e-16	1.2e-15
102	ADAM10	-0.198367	-0.451663	0.0549288	0.1248	0.177205
103	ADAR	1.04922	0.70056	1.39788	3.68e-09	1.88e-08
104	ADARB1	-2.10564	-2.71954	-1.49173	1.79e-11	1.18e-10
105	ADARB2	0.00681128	-0.495085	0.508708	0.97878	0.983899
107	ADCY1	0.37816	0.108259	0.648061	0.00603053	0.0116324
108	ADCY2	0.0792925	-0.25805	0.416635	0.645021	0.712827
109	ADCY3	-0.435323	-0.757993	-0.112653	0.00818735	0.0153257
111	ADCY5	-0.213297	-0.642205	0.215611	0.329711	0.410387
112	ADCY6	-0.134519	-0.301069	0.0320323	0.113419	0.16285
113	ADCY7	-0.707777	-0.926568	-0.488985	2.29e-10	1.35e-09
114	ADCY8	-0.712955	-1.57229	0.146377	0.103927	0.150808
115	ADCY9	-1.30599	-1.6717	-0.940279	2.57e-12	1.87e-11
116	ADCYAP1	-0.183348	-0.617432	0.250735	0.407756	0.490685
117	ADCYAP1R1	-0.594052	-1.13311	-0.0549979	0.0307779	0.0508141
118	ADD1	-1.46502	-2.33636	-0.593687	0.00098284	0.00221115
119	ADD2	0.0523006	-0.237279	0.341881	0.723349	0.779903
120	ADD3	-0.570802	-0.739267	-0.402338	3.12e-11	2.01e-10
123	PLIN2	-0.689211	-0.948407	-0.430016	1.87e-07	7.58e-07
124	ADH1A	-1.46578	-2.09419	-0.837378	4.84e-06	1.6e-05
125	ADH1B	-2.67783	-3.35963	-1.99602	1.38e-14	1.26e-13
126	ADH1C	-0.434057	-0.971655	0.103542	0.113541	0.163003
127	ADH4	0.00362771	-0.182753	0.190009	0.969569	0.977196
128	ADH5	-0.820696	-1.01072	-0.630668	2.57e-17	3.06e-16
130	ADH6	-0.0882714	-0.44119	0.264647	0.623976	0.693923
131	ADH7	-0.0356075	-0.294784	0.223569	0.787719	0.832825
132	ADK	0.594676	0.382877	0.806474	3.73e-08	1.66e-07
133	ADM	-0.40137	-0.678588	-0.124152	0.00454356	0.00899817
134	ADORA1	0.381723	0.0712741	0.692173	0.0159552	0.0280646
135	ADORA2A	-0.78546	-1.70205	0.131129	0.0930414	0.136587
136	ADORA2B	0.559589	0.0732384	1.04594	0.0241264	0.0407719
140	ADORA3	0.366227	0.060565	0.671888	0.0188583	0.0326202
141	ADPRH	-1.27152	-2.21179	-0.331247	0.00803877	0.0150796
142	PARP1	1.83209	1.39497	2.26922	2.13e-16	2.32e-15
143	PARP4	-0.270885	-0.509146	-0.0326227	0.0258591	0.0434088
146	ADRA1D	-0.0378793	-0.721931	0.646172	0.913573	0.933217
147	ADRA1B	0.145379	-0.272383	0.563141	0.495203	0.576505
148	ADRA1A	-1.64839	-2.56056	-0.736217	0.000397313	0.000960941
150	ADRA2A	0.394443	0.138482	0.650403	0.0025247	0.00524465
151	ADRA2B	0.0530181	-0.123229	0.229265	0.555465	0.632982
152	ADRA2C	-0.351714	-0.697117	-0.00631153	0.0459581	0.072839
153	ADRB1	-1.41001	-2.28541	-0.534613	0.00159441	0.0034501
154	ADRB2	-2.77043	-3.15824	-2.38262	1.52e-44	1.28e-42
155	ADRB3	0.262751	0.00342321	0.522079	0.0470515	0.0743713
156	GRK2	0.483136	0.305279	0.660992	1.01e-07	4.25e-07
157	GRK3	-0.59148	-0.923161	-0.2598	0.000473762	0.00112752
158	ADSL	0.642698	0.300972	0.984424	0.000227642	0.00057354
159	ADSS	0.873509	0.567519	1.1795	2.2e-08	1.01e-07
160	AP2A1	0.612991	0.415888	0.810094	1.09e-09	5.92e-09
161	AP2A2	0.135344	-0.16908	0.439769	0.383546	0.466393
162	AP1B1	0.399401	0.185508	0.613294	0.000252387	0.000631894
163	AP2B1	0.272977	-0.0857493	0.631704	0.135841	0.190907
164	AP1G1	0.478786	0.172378	0.785194	0.00219428	0.00460804
165	AEBP1	0.207368	0.0407053	0.37403	0.0147418	0.0261149
166	AES	-0.95169	-1.20315	-0.700233	1.19e-13	9.9e-13
167	CRISP1	0.144322	-0.022228	0.310872	0.0894354	0.131806
172	AFG3L1P	-0.406831	-1.03755	0.223886	0.206146	0.274562
173	AFM	0.481721	0.0402531	0.923188	0.0324621	0.0533158
174	AFP	0.227218	-0.000376732	0.454812	0.0503804	0.0791067
175	AGA	0.701056	0.531368	0.870745	5.61e-16	5.93e-15
176	ACAN	0.544076	0.264352	0.823801	0.000137724	0.000361693
177	AGER	-4.12584	-5.12162	-3.13007	4.63e-16	4.94e-15
178	AGL	0.123515	-0.0429631	0.289993	0.145903	0.203266
181	AGRP	-1.09064	-1.71589	-0.465377	0.000629079	0.00146501
182	JAG1	-0.853199	-1.18128	-0.525114	3.45e-07	1.35e-06
183	AGT	0.893111	0.674876	1.11135	1.05e-15	1.08e-14
185	AGTR1	-1.86765	-2.15861	-1.57669	2.7e-36	1.35e-34
186	AGTR2	-1.07583	-1.51233	-0.639339	1.36e-06	4.9e-06
187	APLNR	-0.433863	-0.795431	-0.072295	0.01868	0.0323409
189	AGXT	0.307324	0.0820881	0.53256	0.00748898	0.014159
190	NR0B1	0.515699	0.347529	0.683869	1.85e-09	9.82e-09
191	AHCY	1.55676	1.37502	1.73851	2.98e-63	7.4e-61
196	AHR	-0.577733	-1.0331	-0.122371	0.0128944	0.023137
197	AHSG	0.455692	0.282727	0.628657	2.42e-07	9.66e-07
199	AIF1	-1.02808	-1.20068	-0.855471	1.73e-31	6.22e-30
202	AIM1	-0.306388	-0.526703	-0.0860733	0.00641674	0.0123044
203	AK1	-1.16943	-1.68398	-0.65488	8.41e-06	2.69e-05
204	AK2	0.211195	-0.284039	0.706429	0.403246	0.486449
205	AK4	1.55317	0.942731	2.1636	6.14e-07	2.32e-06
207	AKT1	0.156185	-0.342507	0.654878	0.539321	0.617815
208	AKT2	0.392034	0.156463	0.627606	0.00110732	0.00246757
210	ALAD	0.428806	-0.0355852	0.893197	0.0703304	0.106722
211	ALAS1	-0.612167	-1.25025	0.0259188	0.0600602	0.0925192
212	ALAS2	-0.75158	-1.43874	-0.064417	0.0320571	0.0527244
213	ALB	0.373582	0.201091	0.546074	2.19e-05	6.54e-05
214	ALCAM	-0.614108	-0.782787	-0.445429	9.63e-13	7.32e-12
215	ABCD1	0.0430508	-0.476362	0.562464	0.870952	0.89981
216	ALDH1A1	-1.3686	-1.56641	-1.17079	6.88e-42	4.77e-40
217	ALDH2	-1.49551	-1.68142	-1.30959	5.31e-56	8.44e-54
218	ALDH3A1	0.146801	-0.125681	0.419283	0.290994	0.369107
219	ALDH1B1	1.03833	0.540765	1.5359	4.31e-05	0.000122995
220	ALDH1A3	0.0815617	-0.247173	0.410296	0.626767	0.696477
221	ALDH3B1	-0.846844	-1.1898	-0.503891	1.3e-06	4.7e-06
222	ALDH3B2	0.91759	0.65694	1.17824	5.21e-12	3.66e-11
223	ALDH9A1	-0.453509	-0.62149	-0.285527	1.21e-07	5.03e-07
224	ALDH3A2	-0.252992	-0.423455	-0.082529	0.00362733	0.00730337
225	ABCD2	-0.0938967	-0.313035	0.125241	0.401015	0.4842
226	ALDOA	2.08734	1.57714	2.59754	1.07e-15	1.1e-14
229	ALDOB	0.800467	0.1434	1.45753	0.0169536	0.0296628
230	ALDOC	0.865376	0.463483	1.26727	2.44e-05	7.24e-05
231	AKR1B1	-0.324627	-0.49188	-0.157375	0.000142274	0.000372853
238	ALK	0.11758	-0.0542481	0.289407	0.179862	0.243921
239	ALOX12	-0.0449978	-0.363358	0.273362	0.78176	0.827932
240	ALOX5	-2.10455	-2.49448	-1.71462	3.76e-26	9.29e-25
241	ALOX5AP	-1.92103	-2.21571	-1.62635	2.2e-37	1.18e-35
242	ALOX12B	0.628528	0.446781	0.810275	1.22e-11	8.23e-11
245	ALOX12P2	0.779696	0.609716	0.949676	2.47e-19	3.48e-18
246	ALOX15	-0.464555	-0.921828	-0.00728222	0.0464614	0.0735375
247	ALOX15B	-0.413858	-0.900349	0.0726327	0.0954463	0.139671
248	ALPI	0.488804	0.286955	0.690653	2.07e-06	7.26e-06
249	ALPL	-0.573202	-0.953613	-0.19279	0.00314437	0.00641405
250	ALPP	-0.524885	-1.00219	-0.0475762	0.0311364	0.0513579
251	ALPPL2	0.339516	-0.0240099	0.703042	0.0671732	0.102339
257	ALX3	0.408844	0.236216	0.581472	3.45e-06	1.17e-05
258	AMBN	0.153645	-0.0291628	0.336453	0.0994972	0.145037
259	AMBP	0.390377	0.211032	0.569722	1.99e-05	5.98e-05
262	AMD1	-0.624081	-0.926736	-0.321425	5.31e-05	0.000148927
265	AMELX	0.0956234	-0.0762405	0.267487	0.275491	0.352146
266	AMELY	0.290294	0.0845613	0.496027	0.00568255	0.0110236
267	AMFR	-0.161661	-0.402803	0.0794808	0.188861	0.254511
268	AMH	0.402287	0.0479781	0.756596	0.0260565	0.0437191
269	AMHR2	0.3797	0.0831784	0.676222	0.0120813	0.0218225
270	AMPD1	-0.15618	-0.617988	0.305627	0.507429	0.588327
271	AMPD2	0.341785	-0.131068	0.814638	0.156573	0.216418
272	AMPD3	0.988231	0.780277	1.19619	1.23e-20	1.94e-19
273	AMPH	0.38364	0.190172	0.577108	0.000101682	0.00027273
274	BIN1	0.261048	-0.0934332	0.615529	0.148919	0.206974
275	AMT	-0.602847	-0.871122	-0.334572	1.06e-05	3.34e-05
276	AMY1A	0.0263233	-0.475739	0.528385	0.918152	0.936898
279	AMY2A	0.0183724	-0.231644	0.268389	0.885479	0.911166
280	AMY2B	0.0459942	-0.14044	0.232428	0.628717	0.698314
283	ANG	-0.608203	-0.777081	-0.439324	1.68e-12	1.25e-11
284	ANGPT1	-2.55728	-3.06026	-2.05429	2.17e-23	4.36e-22
285	ANGPT2	0.196066	0.0292161	0.362915	0.0212697	0.0363687
286	ANK1	0.275411	0.053757	0.497064	0.0148791	0.0263339
287	ANK2	-1.1538	-1.45397	-0.853631	4.93e-14	4.27e-13
288	ANK3	-1.06346	-1.55628	-0.570634	2.34e-05	6.96e-05
290	ANPEP	-0.864681	-1.04172	-0.687639	1.04e-21	1.83e-20
291	SLC25A4	-1.09909	-1.42079	-0.777404	2.14e-11	1.4e-10
292	SLC25A5	0.637777	0.458776	0.816778	2.88e-12	2.08e-11
293	SLC25A6	0.239572	0.0571919	0.421952	0.0100362	0.0184596
301	ANXA1	-1.20112	-1.56869	-0.833561	1.51e-10	9.02e-10
302	ANXA2	-0.7476	-1.12114	-0.374056	8.76e-05	0.00023741
303	ANXA2P1	-0.593901	-0.890959	-0.296842	8.91e-05	0.000241186
304	ANXA2P2	-0.73944	-0.925799	-0.55308	7.44e-15	6.97e-14
305	ANXA2P3	-0.638683	-1.02789	-0.249479	0.00129856	0.00286177
306	ANXA3	-2.02092	-2.33491	-1.70694	1.74e-36	8.86e-35
307	ANXA4	-0.883148	-1.2089	-0.557398	1.07e-07	4.49e-07
308	ANXA5	-0.956085	-1.1283	-0.783869	1.42e-27	3.91e-26
309	ANXA6	-0.951097	-1.28152	-0.62067	1.69e-08	7.84e-08
310	ANXA7	-0.140243	-0.366433	0.0859469	0.224281	0.29522
311	ANXA11	-0.852482	-1.16888	-0.536084	1.29e-07	5.31e-07
312	ANXA13	0.297951	0.130874	0.465027	0.000473635	0.00112735
313	AOAH	-0.59806	-0.921912	-0.274207	0.000295201	0.000731612
314	AOC2	-0.610525	-1.28943	0.0683793	0.0779754	0.116806
316	AOX1	-1.58561	-1.79572	-1.3755	1.68e-49	1.82e-47
317	APAF1	0.276112	-0.0399952	0.592219	0.0869001	0.12841
318	NUDT2	-0.355663	-0.698726	-0.0125995	0.0421591	0.0674143
319	APOF	0.00527504	-0.246703	0.257253	0.967271	0.975484
320	APBA1	0.436914	0.211073	0.662755	0.000149584	0.000390413
321	APBA2	0.888545	0.598572	1.17852	1.9e-09	1.01e-08
322	APBB1	-1.21332	-1.79708	-0.629559	4.63e-05	0.000131172
323	APBB2	-1.23941	-1.57543	-0.903383	4.86e-13	3.8e-12
324	APC	-1.11563	-1.50912	-0.72214	2.75e-08	1.24e-07
325	APCS	0.205132	-0.0824984	0.492762	0.162172	0.223034
326	AIRE	0.376225	0.169284	0.583166	0.000366252	0.000892558
327	APEH	0.739877	0.316381	1.16337	0.000616632	0.00143792
328	APEX1	1.37485	1.08532	1.66438	1.31e-20	2.07e-19
329	BIRC2	-0.444724	-0.775192	-0.114257	0.00834932	0.0155971
330	BIRC3	-0.20334	-0.469283	0.0626028	0.13398	0.188492
331	XIAP	0.54478	0.350007	0.739553	4.2e-08	1.85e-07
332	BIRC5	1.94667	1.12726	2.76608	3.22e-06	1.1e-05
333	APLP1	0.389595	-0.269378	1.04857	0.246554	0.320152
334	APLP2	-0.319733	-0.674737	0.0352705	0.077524	0.116261
335	APOA1	-0.14163	-0.861365	0.578104	0.699731	0.759433
336	APOA2	0.399256	0.221452	0.57706	1.08e-05	3.38e-05
337	APOA4	0.443048	0.263184	0.622912	1.38e-06	4.97e-06
338	APOB	0.142342	-0.0799665	0.36465	0.209499	0.278502
339	APOBEC1	0.526253	0.313625	0.738882	1.23e-06	4.46e-06
341	APOC1	-0.887148	-1.16998	-0.604311	7.86e-10	4.35e-09
342	APOC1P1	-0.121995	-0.426254	0.182263	0.431945	0.514813
343	AQP8	-0.0582049	-0.402578	0.286168	0.740443	0.794161
344	APOC2	-0.225972	-1.61475	1.16281	0.749794	0.801871
345	APOC3	0.126171	-0.0405396	0.292882	0.137981	0.193605
346	APOC4	-0.235315	-1.84593	1.3753	0.774606	0.822055
347	APOD	-0.305764	-0.547926	-0.0636022	0.0133335	0.0238419
348	APOE	0.275004	0.0198277	0.530181	0.0346644	0.0565391
350	APOH	-0.140988	-0.841414	0.559439	0.693199	0.753544
351	APP	0.010029	-0.333739	0.353798	0.954402	0.96513
353	APRT	1.14117	0.966601	1.31573	1.39e-37	7.57e-36
354	KLK3	0.079711	-0.279458	0.43888	0.663578	0.728386
355	FAS	-1.02844	-1.31187	-0.745009	1.15e-12	8.63e-12
356	FASLG	0.100172	-0.0715559	0.271901	0.25292	0.327514
357	SHROOM2	-0.731716	-0.922391	-0.541042	5.42e-14	4.67e-13
358	AQP1	-1.54481	-1.84497	-1.24466	6.28e-24	1.32e-22
359	AQP2	0.0829546	-0.270601	0.43651	0.645613	0.713183
360	AQP3	0.014991	-0.278723	0.308705	0.920316	0.938789
361	AQP4	-2.15715	-2.77114	-1.54317	5.74e-12	4.02e-11
362	AQP5	0.340865	0.0509088	0.630821	0.021218	0.0362891
363	AQP6	0.506098	0.283642	0.728553	8.23e-06	2.64e-05
364	AQP7	0.953918	-0.513342	2.42118	0.202577	0.270498
366	AQP9	-1.48278	-1.79795	-1.16761	2.94e-20	4.5e-19
367	AR	-0.628073	-0.97602	-0.280126	0.000403331	0.000973716
368	ABCC6	-0.370305	-0.846752	0.106141	0.127676	0.180718
369	ARAF	-0.178998	-0.622434	0.264438	0.42885	0.511524
372	ARCN1	0.911879	0.465264	1.35849	6.29e-05	0.00017427
373	TRIM23	-0.319119	-0.594659	-0.0435797	0.0232104	0.0393812
374	AREG	-0.485958	-0.67179	-0.300125	2.97e-07	1.17e-06
375	ARF1	1.01062	0.704157	1.31709	1.02e-10	6.25e-10
377	ARF3	0.557712	0.222176	0.893249	0.00112298	0.00250035
378	ARF4	0.866921	0.408156	1.32569	0.000212464	0.000539674
379	ARL4D	-0.0312171	-0.235364	0.17293	0.7644	0.813567
381	ARF5	0.641244	0.472202	0.810285	1.05e-13	8.77e-13
382	ARF6	0.281963	0.115088	0.448839	0.000927387	0.00209241
383	ARG1	-0.726445	-0.989085	-0.463805	5.92e-08	2.55e-07
384	ARG2	0.406847	-0.0589459	0.87264	0.0869093	0.128414
387	RHOA	-1.16832	-1.59704	-0.739612	9.23e-08	3.88e-07
388	RHOB	-0.70529	-0.952054	-0.458526	2.12e-08	9.71e-08
389	RHOC	0.168826	-0.0991992	0.436852	0.216994	0.286896
390	RND3	-0.82599	-1.02479	-0.627192	3.84e-16	4.12e-15
391	RHOG	-0.939218	-1.11978	-0.758658	2.08e-24	4.56e-23
392	ARHGAP1	0.749145	0.491957	1.00633	1.14e-08	5.4e-08
393	ARHGAP4	-0.125483	-0.503416	0.25245	0.515204	0.595708
394	ARHGAP5	-0.141849	-0.429744	0.146046	0.334196	0.415089
395	ARHGAP6	-1.93381	-2.77091	-1.09672	5.96e-06	1.95e-05
396	ARHGDIA	-0.00149964	-0.18846	0.18546	0.987457	0.990611
397	ARHGDIB	-0.558942	-0.844946	-0.272939	0.000127936	0.00033779
398	ARHGDIG	0.149057	-0.0337113	0.331826	0.109942	0.158406
399	RHOH	0.429422	0.261722	0.597122	5.2e-07	1.98e-06
400	ARL1	0.98909	0.412834	1.56535	0.000767953	0.00175878
401	PHOX2A	0.39311	0.178716	0.607504	0.000325936	0.000802074
402	ARL2	-0.821018	-1.04069	-0.601349	2.38e-13	1.92e-12
403	ARL3	-0.269008	-0.570973	0.0329561	0.0808013	0.120501
405	ARNT	-0.266977	-0.637579	0.103625	0.15797	0.21812
406	ARNTL	-0.283227	-0.487566	-0.0788886	0.00659475	0.0126183
407	ARR3	0.165785	-0.141515	0.473086	0.290338	0.368364
408	ARRB1	-1.98329	-2.34458	-1.622	5.37e-27	1.41e-25
409	ARRB2	-1.73145	-1.93281	-1.53008	1e-63	2.55e-61
410	ARSA	0.580752	0.392984	0.768521	1.34e-09	7.24e-09
411	ARSB	-0.0932101	-0.454546	0.268125	0.613143	0.684685
412	STS	0.218094	-0.297793	0.73398	0.40734	0.490352
414	ARSD	0.534589	0.301014	0.768164	7.26e-06	2.34e-05
415	ARSE	1.09568	0.7103	1.48105	2.51e-08	1.14e-07
416	ARSF	0.0216928	-0.472352	0.515737	0.931419	0.947798
417	ART1	0.015578	-0.586977	0.618133	0.959587	0.969261
419	ART3	-0.141459	-0.555435	0.272517	0.503026	0.583991
420	ART4	-1.07514	-1.71748	-0.432793	0.00103611	0.00231914
421	ARVCF	0.370601	0.0973604	0.643841	0.00785281	0.0147642
427	ASAH1	-0.996021	-1.35171	-0.640328	4.06e-08	1.79e-07
429	ASCL1	0.538936	0.286892	0.79098	2.78e-05	8.16e-05
430	ASCL2	0.581033	0.193992	0.968073	0.00325745	0.00662109
432	ASGR1	-0.437276	-0.986403	0.111852	0.118585	0.169301
433	ASGR2	-0.164027	-0.330789	0.00273421	0.0538765	0.083991
434	ASIP	0.301752	0.0667244	0.536779	0.0118561	0.0214523
435	ASL	0.0386326	-0.534544	0.611809	0.894903	0.918672
438	ASMT	0.295332	0.12304	0.467624	0.00078042	0.00178482
439	ASNA1	0.117998	-0.192563	0.428559	0.456458	0.539044
440	ASNS	1.18285	0.847979	1.51773	4.42e-12	3.13e-11
443	ASPA	-2.34794	-2.9468	-1.74909	1.54e-14	1.4e-13
444	ASPH	0.711564	0.485737	0.93739	6.59e-10	3.68e-09
445	ASS1	0.327848	0.150858	0.504838	0.000282822	0.000703384
460	ASTN1	-0.482169	-0.683248	-0.281089	2.6e-06	8.98e-06
462	SERPINC1	0.102933	-0.0637354	0.269602	0.226103	0.297451
463	ZFHX3	-0.224145	-0.528738	0.0804483	0.149217	0.207321
466	ATF1	-0.125812	-0.570375	0.318751	0.579118	0.654188
467	ATF3	-1.06117	-1.33537	-0.786964	3.32e-14	2.92e-13
468	ATF4	-0.369578	-0.816772	0.077616	0.105278	0.152527
471	ATIC	2.17676	1.57217	2.78136	1.71e-12	1.26e-11
472	ATM	-0.194449	-0.739625	0.350727	0.484512	0.566291
473	RERE	-0.424602	-0.751949	-0.0972562	0.0110132	0.0200857
474	ATOH1	0.457838	0.178591	0.737084	0.00131148	0.00288813
475	ATOX1	0.503277	0.33487	0.671683	4.71e-09	2.37e-08
476	ATP1A1	-0.191231	-0.523154	0.140693	0.258817	0.334066
477	ATP1A2	-1.47451	-2.17315	-0.775862	3.53e-05	0.000102075
478	ATP1A3	0.410147	0.097458	0.722837	0.0101452	0.0186472
479	ATP12A	0.094955	-0.228684	0.418594	0.565258	0.641686
480	ATP1A4	0.333992	-0.245644	0.913628	0.25875	0.333999
481	ATP1B1	0.831742	0.464124	1.19936	9.23e-06	2.93e-05
482	ATP1B2	-0.77339	-1.30322	-0.243562	0.00422362	0.00841104
483	ATP1B3	-0.981976	-1.15426	-0.809688	5.65e-29	1.73e-27
486	FXYD2	0.335228	-0.241939	0.912395	0.254962	0.329774
487	ATP2A1	0.349123	-0.133345	0.831591	0.156113	0.21583
488	ATP2A2	0.368479	-0.205729	0.942688	0.208485	0.277241
489	ATP2A3	0.258396	0.0914903	0.425302	0.00241072	0.00502564
490	ATP2B1	-1.01418	-1.27138	-0.756985	1.09e-14	1e-13
491	ATP2B2	0.171926	-0.132859	0.476712	0.268901	0.345037
492	ATP2B3	0.261412	-0.0734808	0.596304	0.126037	0.178769
493	ATP2B4	-0.858053	-1.10704	-0.609063	1.44e-11	9.61e-11
495	ATP4A	0.323016	0.150257	0.495776	0.000247691	0.000621168
496	ATP4B	0.51606	0.342816	0.689304	5.27e-09	2.63e-08
498	ATP5A1	0.108865	-0.30397	0.5217	0.605265	0.677535
501	ALDH7A1	0.204448	0.0376639	0.371233	0.0162803	0.0285937
506	ATP5B	0.486641	0.0967534	0.87653	0.0144314	0.0256102
509	ATP5C1	0.581769	0.369379	0.794159	7.93e-08	3.36e-07
513	ATP5D	-0.130462	-0.672217	0.411292	0.636935	0.705773
515	ATP5F1	0.184043	-0.0113123	0.379398	0.0648241	0.0990923
516	ATP5G1	0.976898	0.754844	1.19895	6.55e-18	8.18e-17
517	ATP5G2	0.594631	0.381682	0.807581	4.43e-08	1.94e-07
518	ATP5G3	0.372896	-0.294764	1.04056	0.273664	0.350193
520	ATP5G2P1	0.44063	0.134283	0.746978	0.00481609	0.00949607
521	ATP5I	0.314956	-0.00359665	0.633508	0.0526434	0.0822567
522	ATP5J	0.171859	-0.0293121	0.37303	0.0940555	0.137846
523	ATP6V1A	0.0477608	-0.202562	0.298084	0.708438	0.767112
525	ATP6V1B1	0.103349	-0.534952	0.74165	0.750983	0.802899
526	ATP6V1B2	-1.06593	-1.23897	-0.892894	1.46e-33	6.12e-32
527	ATP6V0C	-0.124528	-0.387212	0.138157	0.352819	0.434696
528	ATP6V1C1	0.866876	0.626612	1.10714	1.53e-12	1.14e-11
529	ATP6V1E1	-0.889968	-1.06722	-0.712715	7.51e-23	1.44e-21
533	ATP6V0B	0.124629	-0.041864	0.291123	0.142338	0.198953
534	ATP6V1G2	-0.00201401	-0.218428	0.2144	0.985447	0.989097
535	ATP6V0A1	-0.46775	-0.787285	-0.148215	0.00411664	0.0082096
537	ATP6AP1	-0.179372	-0.346019	-0.0127245	0.0348912	0.056846
538	ATP7A	-0.0675262	-0.247015	0.111963	0.4609	0.543289
539	ATP5O	-0.167775	-0.346011	0.0104614	0.0650484	0.0993848
540	ATP7B	0.0430565	-0.197376	0.283489	0.725596	0.781687
541	ALDH7A1P1	0.485297	0.229213	0.741381	0.000203798	0.000519783
545	ATR	0.828639	0.31779	1.33949	0.0014767	0.00321612
546	ATRX	0.0957164	-0.226423	0.417856	0.560325	0.637421
547	KIF1A	0.760779	0.530084	0.991474	1.02e-10	6.24e-10
549	AUH	-0.299944	-0.555364	-0.0445233	0.021357	0.0365151
550	AUP1	1.24122	0.975768	1.50667	4.97e-20	7.45e-19
551	AVP	0.362452	0.100116	0.624788	0.00676996	0.0129185
552	AVPR1A	0.0361592	-0.130149	0.202468	0.670006	0.733425
553	AVPR1B	0.563068	0.38964	0.736496	1.97e-10	1.17e-09
554	AVPR2	-0.591112	-1.34882	0.166599	0.126258	0.179011
558	AXL	-1.27381	-1.44966	-1.09796	9.51e-46	8.48e-44
563	AZGP1	0.278874	-0.201192	0.758941	0.254888	0.329698
566	AZU1	-0.0709911	-0.711285	0.569303	0.82797	0.866068
567	B2M	-0.680894	-0.992194	-0.369595	1.81e-05	5.49e-05
570	BAAT	0.745619	0.425649	1.06559	4.94e-06	1.63e-05
571	BACH1	-0.809671	-0.980473	-0.638869	1.53e-20	2.39e-19
572	BAD	0.088284	-0.0781932	0.254761	0.298627	0.37743
573	BAG1	-0.744103	-1.16097	-0.327231	0.000467931	0.00111503
575	ADGRB1	0.778612	0.56417	0.993055	1.11e-12	8.36e-12
576	ADGRB2	1.03902	0.843861	1.23418	1.72e-25	4.06e-24
577	ADGRB3	-1.68466	-2.31081	-1.05851	1.34e-07	5.52e-07
578	BAK1	1.11088	0.758114	1.46364	6.74e-10	3.76e-09
579	NKX3-2	0.807053	0.556067	1.05804	2.93e-10	1.7e-09
580	BARD1	1.13868	0.850373	1.42698	9.87e-15	9.14e-14
581	BAX	0.170909	-0.0839842	0.425802	0.188786	0.254471
582	BBS1	-0.656734	-0.941862	-0.371605	6.35e-06	2.07e-05
583	BBS2	-0.662467	-0.928706	-0.396228	1.08e-06	3.94e-06
585	BBS4	-0.355802	-0.719638	0.00803384	0.0552778	0.0859855
586	BCAT1	0.101694	-0.12739	0.330779	0.384268	0.467154
587	BCAT2	0.259519	0.0204676	0.49857	0.0333556	0.054639
590	BCHE	-1.6963	-2.35829	-1.0343	5.11e-07	1.95e-06
593	BCKDHA	-0.0508365	-0.33141	0.229737	0.722498	0.779263
594	BCKDHB	0.116534	-0.158123	0.391192	0.40564	0.488918
595	CCND1	-0.234801	-0.737276	0.267674	0.359735	0.442058
596	BCL2	-0.0499936	-0.296539	0.196552	0.691047	0.751513
597	BCL2A1	-1.07325	-1.33217	-0.814342	4.49e-16	4.8e-15
598	BCL2L1	0.157732	-0.0859864	0.401451	0.204631	0.27275
599	BCL2L2	-1.7541	-2.18957	-1.31862	2.91e-15	2.85e-14
602	BCL3	-0.0895146	-0.425186	0.246157	0.601204	0.673952
604	BCL6	-1.04113	-1.47772	-0.604528	2.96e-06	1.01e-05
605	BCL7A	0.693646	0.233291	1.154	0.00314494	0.00641459
607	BCL9	1.33143	0.429465	2.2334	0.00381355	0.00765571
608	TNFRSF17	0.835647	0.633927	1.03737	4.69e-16	4.99e-15
610	HCN2	0.738414	0.477931	0.998897	2.76e-08	1.24e-07
611	OPN1SW	-0.023812	-0.195616	0.147992	0.78589	0.831474
613	BCR	0.90417	0.618685	1.18966	5.38e-10	3.03e-09
617	BCS1L	0.939267	0.556725	1.32181	1.49e-06	5.35e-06
618	BCYRN1	0.14962	-0.100783	0.400022	0.241554	0.314607
622	BDH1	1.3576	1.179	1.5362	3.39e-50	3.89e-48
623	BDKRB1	0.275791	0.0457539	0.505827	0.0187836	0.0325069
624	BDKRB2	0.41333	0.245723	0.580938	1.34e-06	4.84e-06
627	BDNF	-1.40962	-2.19909	-0.620152	0.000466003	0.00111109
629	CFB	1.1242	0.613375	1.63503	1.61e-05	4.92e-05
631	BFSP1	-0.154279	-0.464916	0.156359	0.330344	0.411005
633	BGN	0.641732	0.269568	1.0139	0.000725877	0.0016711
634	CEACAM1	1.43937	1.17868	1.70006	2.71e-27	7.33e-26
635	BHMT	0.342465	0.174889	0.510041	6.19e-05	0.000171838
636	BICD1	0.122265	-0.0909723	0.335503	0.261099	0.336661
637	BID	0.144464	-0.131602	0.420529	0.305061	0.383862
638	BIK	1.40506	1.13441	1.67571	2.56e-24	5.57e-23
639	PRDM1	0.382589	0.121652	0.643526	0.00405661	0.00809904
640	BLK	0.409558	-0.0381423	0.857258	0.0729757	0.110301
641	BLM	1.57108	1.1665	1.97566	2.72e-14	2.42e-13
642	BLMH	0.0177346	-0.212516	0.247985	0.880005	0.906814
643	CXCR5	0.680776	0.511846	0.849705	2.82e-15	2.77e-14
644	BLVRA	0.139203	-0.47309	0.751495	0.655893	0.721699
645	BLVRB	-0.284058	-0.56511	-0.00300478	0.0476004	0.0751715
646	BNC1	0.0276502	-0.412642	0.467942	0.90204	0.924473
648	BMI1	-0.163022	-0.548159	0.222114	0.406751	0.489951
649	BMP1	0.653266	0.103452	1.20308	0.0198725	0.0342149
650	BMP2	-1.45344	-1.8282	-1.07867	2.93e-14	2.6e-13
651	BMP3	0.312124	-0.146481	0.770728	0.182223	0.246695
652	BMP4	-0.0578024	-0.272324	0.156719	0.597425	0.670533
653	BMP5	-1.13784	-1.44317	-0.832518	2.79e-13	2.23e-12
654	BMP6	-0.637829	-0.906643	-0.369015	3.31e-06	1.12e-05
655	BMP7	0.0676465	-0.290308	0.425601	0.711088	0.769445
656	BMP8B	1.21101	0.835063	1.58695	2.73e-10	1.59e-09
657	BMPR1A	-1.17205	-1.85908	-0.485026	0.000826813	0.00188237
658	BMPR1B	-0.152871	-0.457601	0.151859	0.32549	0.405755
659	BMPR2	-1.36441	-1.93362	-0.795202	2.63e-06	9.05e-06
660	BMX	-1.18642	-1.69151	-0.681334	4.15e-06	1.39e-05
661	POLR3D	1.02224	0.849046	1.19543	5.97e-31	2.05e-29
662	BNIP1	0.564316	0.329809	0.798823	2.4e-06	8.32e-06
663	BNIP2	-2.04746	-2.63198	-1.46294	6.63e-12	4.62e-11
664	BNIP3	1.10095	0.761591	1.44032	2.04e-10	1.2e-09
665	BNIP3L	-0.485192	-0.770876	-0.199507	0.000872514	0.00197938
666	BOK	-0.119234	-0.444897	0.206429	0.473006	0.555145
667	DST	-1.82612	-2.27451	-1.37772	1.44e-15	1.46e-14
668	FOXL2	0.393628	0.210002	0.577254	2.65e-05	7.82e-05
669	BPGM	-0.0263963	-0.294783	0.241991	0.847143	0.88124
670	BPHL	1.63024	1.35705	1.90343	1.34e-31	4.87e-30
671	BPI	-0.194432	-0.433297	0.0444316	0.110626	0.159271
672	BRCA1	1.19075	0.779001	1.60251	1.44e-08	6.78e-08
673	BRAF	0.789833	0.225405	1.35426	0.00609401	0.0117454
675	BRCA2	0.88325	0.655715	1.11078	2.78e-14	2.46e-13
676	BRDT	0.796727	0.544335	1.04912	6.13e-10	3.43e-09
677	ZFP36L1	0.226109	0.0589487	0.393269	0.00802205	0.0150496
678	ZFP36L2	-0.922291	-1.09935	-0.745234	1.8e-24	3.95e-23
680	BRS3	0.222809	-0.146459	0.592077	0.236966	0.309565
682	BSG	0.514856	0.345934	0.683778	2.32e-09	1.22e-08
683	BST1	-1.28249	-1.61742	-0.947562	6.14e-14	5.25e-13
684	BST2	0.111892	-0.151703	0.375488	0.405423	0.488685
685	BTC	-0.0558922	-0.299806	0.188021	0.653344	0.719519
686	BTD	-0.497933	-0.813101	-0.182765	0.00195791	0.00415376
687	KLF9	-1.81433	-2.41102	-1.21764	2.53e-09	1.32e-08
688	KLF5	0.0329835	-0.311454	0.377421	0.851122	0.884248
689	BTF3	0.0473485	-0.359924	0.454621	0.819755	0.859366
690	BTF3P11	0.186215	0.0143034	0.358126	0.0337508	0.0552093
694	BTG1	-0.872385	-1.04409	-0.700676	2.33e-23	4.67e-22
695	BTK	-1.50675	-1.99117	-1.02234	1.08e-09	5.89e-09
696	BTN1A1	0.400282	0.141187	0.659376	0.0024618	0.00512152
699	BUB1	1.81556	1.21823	2.41289	2.57e-09	1.34e-08
701	BUB1B	2.12286	1.31612	2.9296	2.5e-07	9.96e-07
705	BYSL	1.59412	1.39301	1.79523	1.99e-54	2.9e-52
706	TSPO	-1.0509	-1.37524	-0.726558	2.15e-10	1.26e-09
708	C1QBP	0.853989	0.645017	1.06296	1.15e-15	1.18e-14
710	SERPING1	-1.80984	-1.9965	-1.62318	1.6e-80	9.37e-78
711	ERC2-IT1	0.29541	0.122962	0.467858	0.000786521	0.00179741
712	C1QA	-1.28097	-1.62347	-0.938476	2.29e-13	1.85e-12
713	C1QB	-1.29193	-1.71223	-0.871636	1.69e-09	9.04e-09
714	C1QC	-0.949561	-1.36084	-0.538283	6.03e-06	1.97e-05
715	C1R	-0.146004	-0.449915	0.157908	0.3464	0.427985
716	C1S	0.0973936	-0.253282	0.448069	0.586205	0.660993
717	C2	-0.943627	-1.26252	-0.624733	6.65e-09	3.28e-08
718	C3	-0.53093	-0.709558	-0.352301	5.69e-09	2.84e-08
719	C3AR1	-0.760283	-0.940514	-0.580052	1.36e-16	1.52e-15
722	C4BPA	-0.836218	-1.2703	-0.402136	0.00015957	0.000413923
725	C4BPB	0.545632	0.332244	0.75902	5.4e-07	2.05e-06
726	CAPN5	1.07331	0.899518	1.24711	1e-33	4.26e-32
727	C5	-0.327798	-0.576781	-0.0788154	0.00986891	0.0181725
728	C5AR1	-2.08605	-2.29607	-1.87604	2.04e-84	1.44e-81
729	C6	-0.948603	-1.27263	-0.624573	9.59e-09	4.61e-08
730	C7	-1.67174	-2.00452	-1.33896	7.14e-23	1.38e-21
731	C8A	0.0762775	-0.151028	0.303583	0.510725	0.591467
732	C8B	-1.0206	-1.61193	-0.429266	0.000717596	0.00165402
733	C8G	0.239509	0.026844	0.452175	0.0272887	0.0455551
734	OSGIN2	-0.67733	-0.948401	-0.406259	9.71e-07	3.57e-06
735	C9	-0.0265032	-0.198399	0.145393	0.762507	0.812221
738	VPS51	-0.408344	-0.592246	-0.224441	1.35e-05	4.18e-05
740	MRPL49	0.86977	0.509775	1.22976	2.19e-06	7.63e-06
741	ZNHIT2	0.555767	0.185998	0.925536	0.00322068	0.00655642
744	MPPED2	-0.253931	-0.426008	-0.081855	0.00382434	0.00767591
745	MYRF	-1.5674	-1.75409	-1.38072	7.64e-61	1.65e-58
746	TMEM258	1.23342	1.04719	1.41964	1.56e-38	8.86e-37
747	DAGLA	0.122747	-0.0435945	0.289089	0.148093	0.205989
750	GAS8-AS1	0.334355	0.16163	0.507079	0.000148222	0.000387193
752	FMNL1	-0.568716	-0.766491	-0.370942	1.74e-08	8.08e-08
753	LDLRAD4	-0.405299	-0.763145	-0.0474537	0.0264274	0.0442992
754	PTTG1IP	0.217042	-0.0382532	0.472338	0.0956566	0.13995
755	C21orf2	-0.564841	-0.9886	-0.141083	0.00898822	0.0166889
757	TMEM50B	-0.396366	-0.748008	-0.0447238	0.0271577	0.0453724
758	MPPED1	0.271476	0.0734963	0.469456	0.00719751	0.0136606
759	CA1	-0.196044	-0.960655	0.568566	0.615295	0.686363
760	CA2	-1.27634	-1.6008	-0.951885	1.26e-14	1.15e-13
761	CA3	-1.13178	-1.50139	-0.76217	1.95e-09	1.03e-08
762	CA4	-3.22636	-4.33945	-2.11327	1.34e-08	6.3e-08
763	CA5A	0.466421	0.269241	0.663601	3.55e-06	1.2e-05
765	CA6	0.56492	0.396085	0.733755	5.45e-11	3.42e-10
766	CA7	0.702948	0.238982	1.16691	0.00298275	0.00610911
767	CA8	-0.102269	-0.393759	0.18922	0.49167	0.57301
768	CA9	1.11633	0.721843	1.51081	2.92e-08	1.31e-07
770	CA11	0.510292	0.245866	0.774717	0.000155344	0.000404201
771	CA12	0.535524	-0.106931	1.17798	0.102312	0.148648
773	CACNA1A	0.338788	0.171479	0.506096	7.22e-05	0.000198333
774	CACNA1B	0.598011	0.377806	0.818216	1.02e-07	4.28e-07
775	CACNA1C	-0.569639	-1.13706	-0.0022184	0.049111	0.0773029
776	CACNA1D	-0.439354	-0.793322	-0.0853869	0.0149841	0.0264977
777	CACNA1E	0.503808	0.209025	0.798592	0.0008089	0.00184457
778	CACNA1F	0.384704	0.0946036	0.674805	0.00934629	0.0172953
779	CACNA1S	0.048747	-0.857563	0.955057	0.916043	0.935249
780	DDR1	1.15942	0.655472	1.66337	6.51e-06	2.11e-05
781	CACNA2D1	-0.182927	-0.467367	0.101514	0.207498	0.27612
782	CACNB1	0.207973	-0.00616773	0.422114	0.0569737	0.0883245
783	CACNB2	-0.848707	-1.23509	-0.462323	1.67e-05	5.09e-05
784	CACNB3	1.1035	0.915088	1.29191	1.68e-30	5.62e-29
785	CACNB4	-0.538197	-1.07149	-0.00490391	0.0479302	0.0756414
786	CACNG1	0.0645055	-0.350794	0.479805	0.760803	0.811101
788	SLC25A20	-0.730626	-1.19453	-0.266719	0.00202304	0.00427905
790	CAD	1.475	0.963365	1.98663	1.6e-08	7.47e-08
793	CALB1	0.318531	0.151419	0.485644	0.000187068	0.000480361
794	CALB2	-0.341196	-0.66015	-0.0222413	0.0360258	0.0585277
795	S100G	-0.0312213	-0.246389	0.183946	0.776108	0.823361
796	CALCA	0.437966	0.260957	0.614974	1.24e-06	4.49e-06
797	CALCB	0.314053	0.106789	0.521317	0.00297998	0.00610463
799	CALCR	0.166076	-0.00575887	0.337911	0.0581881	0.0899697
800	CALD1	-0.626811	-0.828781	-0.424842	1.18e-09	6.39e-09
801	CALM1	-1.77553	-1.98979	-1.56127	2.56e-59	5.16e-57
805	CALM2	-0.0829112	-0.304957	0.139134	0.464263	0.546722
808	CALM3	-0.194516	-0.432654	0.0436222	0.109391	0.157751
810	CALML3	0.552972	0.358422	0.747522	2.54e-08	1.15e-07
811	CALR	1.08249	0.709195	1.45579	1.32e-08	6.22e-08
813	CALU	1.52972	1.17356	1.88588	3.83e-17	4.49e-16
814	CAMK4	0.0113689	-0.248221	0.270958	0.931595	0.947871
815	CAMK2A	-0.0521488	-0.678446	0.574149	0.870364	0.899421
816	CAMK2B	0.695607	0.525924	0.86529	9.37e-16	9.7e-15
817	CAMK2D	-0.0378713	-0.348696	0.272953	0.811257	0.852255
818	CAMK2G	0.023457	-0.161385	0.208299	0.803573	0.846201
819	CAMLG	-0.306865	-0.521032	-0.0926982	0.00498039	0.00979263
820	CAMP	-1.85105	-2.90532	-0.796782	0.000579053	0.00135718
821	CANX	0.668187	0.498941	0.837433	1.01e-14	9.34e-14
822	CAPG	-0.40085	-0.720812	-0.080889	0.0140704	0.0250327
823	CAPN1	1.00579	0.683702	1.32788	9.34e-10	5.12e-09
824	CAPN2	-0.42303	-0.614844	-0.231216	1.54e-05	4.73e-05
825	CAPN3	-1.32018	-1.88597	-0.754395	4.8e-06	1.59e-05
826	CAPNS1	-0.646954	-1.04631	-0.247593	0.00149792	0.00325864
827	CAPN6	0.256662	-0.00253719	0.515861	0.0522851	0.0817695
828	CAPS	-0.799078	-1.36629	-0.231868	0.0057594	0.0111573
829	CAPZA1	0.501512	0.24967	0.753354	9.5e-05	0.000256
830	CAPZA2	-1.08036	-1.51465	-0.646082	1.08e-06	3.96e-06
831	CAST	-0.387832	-0.713802	-0.0618618	0.0197048	0.0339483
832	CAPZB	-0.155465	-0.576027	0.265097	0.468746	0.551197
833	CARS	0.863269	0.571631	1.15491	6.57e-09	3.24e-08
834	CASP1	-1.56604	-1.82812	-1.30396	1.11e-31	4.08e-30
835	CASP2	0.790922	0.51752	1.06432	1.43e-08	6.71e-08
836	CASP3	1.22513	0.577716	1.87254	0.000208136	0.000529444
837	CASP4	-0.341975	-0.652352	-0.0315978	0.0308116	0.05085
838	CASP5	-0.757146	-1.14486	-0.369433	0.000129441	0.000341594
839	CASP6	1.26991	0.950123	1.5897	7.07e-15	6.65e-14
840	CASP7	-0.650756	-0.859581	-0.441931	1.01e-09	5.51e-09
841	CASP8	0.34936	0.102664	0.596056	0.00550978	0.0107199
842	CASP9	-0.134106	-0.32503	0.0568182	0.168609	0.230656
843	CASP10	0.177388	-0.116113	0.470889	0.236186	0.30868
844	CASQ1	0.186639	-0.134497	0.507774	0.254662	0.329426
845	CASQ2	-1.89268	-2.55056	-1.23479	1.71e-08	7.96e-08
846	CASR	0.348559	0.118052	0.579067	0.00303927	0.00621343
847	CAT	-2.43297	-2.67424	-2.19169	6.08e-87	5.14e-84
857	CAV1	-3.34302	-3.83084	-2.85521	3.94e-41	2.57e-39
858	CAV2	-2.72009	-3.26891	-2.17127	2.63e-22	4.85e-21
859	CAV3	-0.634901	-1.63601	0.36621	0.213867	0.283418
860	RUNX2	0.902576	0.086964	1.71819	0.030087	0.0498174
861	RUNX1	0.935642	0.620482	1.2508	5.93e-09	2.95e-08
862	RUNX1T1	-1.40201	-1.63711	-1.1669	1.47e-31	5.31e-30
863	CBFA2T3	-1.62524	-2.37842	-0.872057	2.34e-05	6.97e-05
864	RUNX3	-0.696482	-0.982197	-0.410768	1.77e-06	6.28e-06
865	CBFB	0.683049	0.456904	0.909193	3.22e-09	1.66e-08
866	SERPINA6	0.303586	-0.0582571	0.665428	0.100092	0.145743
867	CBL	-0.294355	-0.713691	0.124981	0.168881	0.231013
868	CBLB	0.395696	0.0109971	0.780395	0.0438008	0.0697983
869	CBLN1	0.306598	0.0625465	0.550649	0.013806	0.0245974
871	SERPINH1	1.50978	1.18062	1.83893	2.47e-19	3.48e-18
873	CBR1	0.712312	0.422717	1.00191	1.43e-06	5.14e-06
874	CBR3	0.302075	-0.00239328	0.606544	0.0518282	0.081139
881	CCIN	-0.29938	-0.936278	0.337517	0.356893	0.439076
883	KYAT1	-0.057371	-0.379772	0.26503	0.727259	0.78304
885	CCK	-0.630011	-0.900994	-0.359028	5.2e-06	1.71e-05
886	CCKAR	0.4057	0.204407	0.606992	7.81e-05	0.000213175
887	CCKBR	0.358635	0.143562	0.573708	0.00108215	0.00241504
889	KRIT1	-0.158112	-0.654457	0.338233	0.532396	0.61163
890	CCNA2	1.89587	1.04031	2.75143	1.4e-05	4.34e-05
891	CCNB1	2.31415	1.51627	3.11203	1.31e-08	6.18e-08
892	CCNC	0.494494	0.27056	0.718428	1.5e-05	4.63e-05
894	CCND2	-0.827366	-1.26718	-0.38755	0.000226899	0.000571872
896	CCND3	-1.26653	-1.8677	-0.665362	3.64e-05	0.000105162
898	CCNE1	1.5774	1.03205	2.12275	1.44e-08	6.74e-08
899	CCNF	1.442	0.828945	2.05505	4.02e-06	1.35e-05
900	CCNG1	-0.259913	-0.605621	0.0857941	0.1406	0.196928
901	CCNG2	0.499821	0.0610465	0.938596	0.0255718	0.0429673
902	CCNH	-0.516055	-0.753144	-0.278966	1.99e-05	5.98e-05
904	CCNT1	0.237218	-0.0402295	0.514666	0.0937828	0.137522
905	CCNT2	0.363193	-0.080426	0.806811	0.108575	0.156735
908	CCT6A	1.18746	0.956609	1.41832	6.66e-24	1.39e-22
909	CD1A	0.461699	0.260769	0.662629	6.68e-06	2.17e-05
910	CD1B	0.0641101	-0.288335	0.416555	0.721452	0.778265
911	CD1C	-0.781919	-1.15449	-0.409348	3.9e-05	0.000112079
912	CD1D	-0.47059	-0.689961	-0.25122	2.62e-05	7.72e-05
913	CD1E	-0.2347	-0.603113	0.133713	0.211808	0.281077
914	CD2	-0.0617647	-0.228421	0.104892	0.467603	0.550055
915	CD3D	0.10787	-0.0584893	0.274229	0.203775	0.271833
916	CD3E	0.0395451	-0.126714	0.205804	0.641085	0.709516
917	CD3G	0.04259	-0.123706	0.208886	0.615691	0.68666
919	CD247	-0.790971	-0.984731	-0.597212	1.23e-15	1.26e-14
920	CD4	-0.651846	-0.998101	-0.305591	0.000224476	0.00056644
921	CD5	0.241736	0.00439285	0.47908	0.0459078	0.0727703
922	CD5L	-1.22765	-2.04113	-0.414167	0.00309804	0.00632626
923	CD6	0.0202855	-0.294229	0.3348	0.899405	0.92213
924	CD7	0.320948	0.148456	0.493441	0.000265513	0.00066303
925	CD8A	-0.340674	-0.507838	-0.17351	6.49e-05	0.000179435
926	CD8B	-0.141292	-0.336808	0.0542248	0.156663	0.2165
928	CD9	-0.899903	-1.07117	-0.728639	7.15e-25	1.63e-23
929	CD14	-0.57092	-0.739366	-0.402475	3.07e-11	1.98e-10
930	CD19	1.12281	0.949168	1.29646	8.29e-37	4.31e-35
931	MS4A1	0.720599	0.551261	0.889937	7.4e-17	8.48e-16
932	MS4A3	-0.404859	-0.865939	0.0562204	0.0852542	0.126242
933	CD22	-0.0858017	-0.436454	0.26485	0.631521	0.700876
939	CD27	0.830445	0.642135	1.01875	5.45e-18	6.87e-17
940	CD28	0.37397	0.154069	0.593872	0.000858628	0.0019506
941	CD80	-0.0658421	-0.528515	0.396831	0.780307	0.826642
942	CD86	-0.731958	-0.932301	-0.531616	8.02e-13	6.15e-12
943	TNFRSF8	-0.0643848	-0.536087	0.407318	0.789066	0.833662
944	TNFSF8	-0.174352	-0.545226	0.196522	0.356841	0.439037
945	CD33	-1.28844	-1.95723	-0.619656	0.000159402	0.000413587
946	SIGLEC6	-0.762365	-1.36111	-0.163619	0.0125758	0.0226307
947	CD34	-1.92238	-2.23562	-1.60914	2.52e-33	1.03e-31
948	CD36	-2.481	-3.26427	-1.69773	5.36e-10	3.02e-09
949	SCARB1	-0.0752199	-0.241499	0.0910596	0.375278	0.458122
950	SCARB2	-0.0987305	-0.39878	0.201319	0.518978	0.598958
951	CD37	-1.00015	-1.37694	-0.623357	1.97e-07	7.94e-07
952	CD38	0.543961	0.264491	0.823431	0.000136248	0.000358082
953	ENTPD1	-0.333957	-0.73963	0.0717163	0.106641	0.154218
954	ENTPD2	0.811603	0.598226	1.02498	8.99e-14	7.56e-13
955	ENTPD6	0.976079	0.00914869	1.94301	0.0478714	0.0755599
956	ENTPD3	0.485427	0.17023	0.800625	0.00254039	0.00527465
957	ENTPD5	1.14561	0.817836	1.47339	7.37e-12	5.11e-11
958	CD40	-0.554343	-0.722745	-0.38594	1.11e-10	6.72e-10
959	CD40LG	-0.0254657	-0.333852	0.28292	0.871425	0.900122
960	CD44	-0.995956	-1.24683	-0.745079	7.2e-15	6.77e-14
961	CD47	-0.501877	-0.997842	-0.00591147	0.0473311	0.0747741
962	CD48	-0.500396	-0.668505	-0.332286	5.41e-09	2.7e-08
963	CD53	-1.05842	-1.26503	-0.851799	1.02e-23	2.1e-22
965	CD58	-1.19103	-1.65046	-0.731593	3.76e-07	1.46e-06
966	CD59	-1.30374	-1.63913	-0.968356	2.56e-14	2.28e-13
967	CD63	0.199976	-0.0335705	0.433522	0.0933014	0.136921
968	CD68	-1.23402	-1.54868	-0.919348	1.51e-14	1.38e-13
969	CD69	-1.45851	-1.88973	-1.02729	3.37e-11	2.17e-10
970	CD70	0.657418	0.488157	0.826679	2.69e-14	2.39e-13
971	CD72	0.547137	0.378251	0.716024	2.16e-10	1.27e-09
972	CD74	-0.580952	-0.754791	-0.407114	5.75e-11	3.6e-10
973	CD79A	1.09011	0.916285	1.26393	1.01e-34	4.58e-33
974	CD79B	0.568862	0.400091	0.737633	3.94e-11	2.52e-10
975	CD81	-1.30592	-1.70082	-0.911012	9.08e-11	5.57e-10
976	ADGRE5	-2.17882	-2.55256	-1.80508	3.1e-30	1.02e-28
977	CD151	-0.295258	-0.479263	-0.111253	0.00166089	0.00358146
978	CDA	0.51114	0.271918	0.750363	2.82e-05	8.26e-05
983	CDK1	1.85424	1.25876	2.44972	1.04e-09	5.66e-09
987	LRBA	0.672682	0.393225	0.952139	2.38e-06	8.27e-06
988	CDC5L	0.80152	0.411446	1.19159	5.64e-05	0.000157602
989	SEPT7	-1.0977	-1.76702	-0.428383	0.00130717	0.00287996
990	CDC6	1.4536	0.658913	2.24828	0.000336987	0.00082715
991	CDC20	2.21099	0.999457	3.42253	0.000347777	0.000851229
993	CDC25A	1.32583	0.833122	1.81853	1.33e-07	5.5e-07
994	CDC25B	0.326965	0.159893	0.494036	0.000125199	0.000330906
995	CDC25C	1.48655	0.829592	2.14352	9.21e-06	2.92e-05
996	CDC27	0.301773	-0.0999308	0.703477	0.140916	0.197305
997	CDC34	1.00694	0.711262	1.30261	2.48e-11	1.61e-10
998	CDC42	-0.560562	-0.737885	-0.383239	5.79e-10	3.25e-09
999	CDH1	1.43801	1.20849	1.66754	1.17e-34	5.29e-33
1000	CDH2	0.615136	0.328044	0.902227	2.67e-05	7.88e-05
1001	CDH3	1.41342	0.925039	1.9018	1.41e-08	6.62e-08
1002	CDH4	0.353158	0.000250716	0.706065	0.0498375	0.0783414
1003	CDH5	-3.07172	-3.65979	-2.48365	1.34e-24	3e-23
1004	CDH6	-0.610376	-0.950796	-0.269956	0.000441026	0.00105723
1005	CDH7	0.188004	0.00508795	0.370921	0.043959	0.0700013
1006	CDH8	0.385666	0.0246967	0.746636	0.0362546	0.0588633
1007	CDH9	0.043054	-0.236516	0.322624	0.762777	0.812427
1008	CDH10	-0.209246	-0.67537	0.256878	0.378947	0.461987
1009	CDH11	-0.161023	-0.476614	0.154569	0.317299	0.397207
1010	CDH12	0.064592	-0.165984	0.295168	0.58297	0.657907
1012	CDH13	-1.90071	-2.34635	-1.45507	6.3e-17	7.24e-16
1013	CDH15	0.816667	0.646048	0.987286	6.51e-21	1.05e-19
1014	CDH16	0.327722	-0.143326	0.798769	0.172692	0.235648
1015	CDH17	0.789621	0.619095	0.960148	1.13e-19	1.64e-18
1016	CDH18	0.48116	0.31338	0.648939	1.9e-08	8.78e-08
1017	CDK2	0.60674	0.348093	0.865386	4.27e-06	1.43e-05
1018	CDK3	-0.19828	-1.50999	1.11343	0.767023	0.815881
1019	CDK4	1.4009	1.03	1.77179	1.33e-13	1.1e-12
1020	CDK5	0.949998	0.360356	1.53964	0.00158973	0.00344103
1021	CDK6	-0.303577	-0.584096	-0.023058	0.033916	0.0554539
1022	CDK7	0.9197	0.718454	1.12095	3.33e-19	4.65e-18
1024	CDK8	0.54233	0.24161	0.843049	0.00040827	0.000984515
1025	CDK9	-0.245079	-0.623111	0.132953	0.203853	0.27191
1026	CDKN1A	-0.991476	-1.16958	-0.813375	1.02e-27	2.84e-26
1027	CDKN1B	-0.173989	-0.515419	0.167441	0.317904	0.397728
1028	CDKN1C	-1.35827	-1.65575	-1.06079	3.59e-19	4.98e-18
1029	CDKN2A	0.98869	0.711007	1.26637	2.98e-12	2.15e-11
1030	CDKN2B	-0.96198	-1.6909	-0.233064	0.0096916	0.0178725
1031	CDKN2C	0.649872	0.387885	0.911859	1.16e-06	4.23e-06
1032	CDKN2D	-0.644885	-0.838563	-0.451207	6.75e-11	4.2e-10
1033	CDKN3	1.9158	1.43699	2.39461	4.43e-15	4.27e-14
1036	CDO1	-2.50981	-3.18833	-1.8313	4.17e-13	3.28e-12
1038	CDR1	-0.196358	-0.457348	0.0646312	0.14032	0.196575
1039	CDR2	0.491125	0.318878	0.663373	2.29e-08	1.04e-07
1040	CDS1	-0.109872	-0.309605	0.0898613	0.280961	0.358121
1041	CDSN	0.361803	0.194118	0.529488	2.35e-05	6.98e-05
1043	CD52	-2.1441	-2.5107	-1.7775	2.02e-30	6.72e-29
1044	CDX1	0.804254	0.547996	1.06051	7.69e-10	4.26e-09
1045	CDX2	0.528586	0.307806	0.749366	2.7e-06	9.29e-06
1046	CDX4	0.142368	-0.188761	0.473497	0.399407	0.482452
1047	CLGN	0.621815	0.361635	0.881995	2.81e-06	9.65e-06
1048	CEACAM5	1.26485	1.01638	1.51331	1.91e-23	3.85e-22
1050	CEBPA	-0.598682	-1.06087	-0.13649	0.0111245	0.0202604
1051	CEBPB	-0.705111	-0.953169	-0.457053	2.53e-08	1.14e-07
1052	CEBPD	-0.869892	-1.22762	-0.512169	1.88e-06	6.62e-06
1053	CEBPE	0.287858	-0.107795	0.683512	0.153876	0.213099
1054	CEBPG	0.00118307	-0.165323	0.167689	0.988889	0.991612
1056	CEL	0.282476	-0.011801	0.576753	0.0599222	0.0923536
1057	CELP	0.352315	-0.00821085	0.712841	0.0554509	0.0862356
1058	CENPA	1.90774	1.24466	2.57082	1.71e-08	7.95e-08
1059	CENPB	0.023794	-0.25236	0.299948	0.865895	0.896132
1060	CENPC	-0.447563	-0.871662	-0.0234641	0.0386021	0.0622683
1062	CENPE	1.75867	1.00984	2.5075	4.16e-06	1.39e-05
1063	CENPF	2.16455	1.49604	2.83307	2.21e-10	1.3e-09
1066	CES1	-0.789823	-1.98713	0.407479	0.196036	0.262836
1068	CETN1	0.398672	0.170824	0.62652	0.000604905	0.0014136
1069	CETN2	-0.025959	-0.252489	0.200571	0.82229	0.861662
1070	CETN3	0.26425	0.0650358	0.463465	0.00932739	0.0172641
1071	CETP	-0.613966	-1.25593	0.0279972	0.0608634	0.0936541
1072	CFL1	0.654076	0.470196	0.837955	3.13e-12	2.25e-11
1073	CFL2	-2.18659	-2.85016	-1.52302	1.06e-10	6.44e-10
1075	CTSC	-0.331548	-0.507436	-0.155661	0.000220295	0.000557221
1080	CFTR	-0.813996	-1.17367	-0.454321	9.18e-06	2.91e-05
1081	CGA	0.449595	0.281904	0.617286	1.48e-07	6.07e-07
1082	CGB3	0.801206	0.372699	1.22971	0.00024766	0.000621163
1084	CEACAM3	-0.314262	-0.8436	0.215075	0.244582	0.317884
1087	CEACAM7	0.667222	0.392676	0.941769	1.91e-06	6.71e-06
1088	CEACAM8	-0.508607	-0.886477	-0.130736	0.00833778	0.015581
1089	CEACAM4	-0.0759123	-0.589246	0.437421	0.771938	0.819789
1101	CHAD	0.439764	0.272141	0.607387	2.72e-07	1.07e-06
1102	RCBTB2	-1.35964	-1.58899	-1.13029	3.29e-31	1.17e-29
1103	CHAT	-0.0660846	-0.399517	0.267348	0.697679	0.757674
1104	RCC1	1.93044	1.4713	2.38958	1.71e-16	1.89e-15
1105	CHD1	-0.390919	-0.685748	-0.0960904	0.00935629	0.0173085
1106	CHD2	-0.0910159	-0.277393	0.0953608	0.338499	0.419423
1107	CHD3	0.0776562	-0.197393	0.352705	0.580012	0.655058
1108	CHD4	0.94112	0.636881	1.24536	1.34e-09	7.21e-09
1109	AKR1C4	0.40499	0.217983	0.591996	2.19e-05	6.54e-05
1111	CHEK1	1.54083	0.851889	2.22977	1.17e-05	3.65e-05
1112	FOXN3	-1.41465	-1.63551	-1.19378	3.79e-36	1.88e-34
1113	CHGA	0.183278	-0.0927075	0.459263	0.193059	0.259354
1114	CHGB	0.630285	0.445719	0.81485	2.18e-11	1.43e-10
1116	CHI3L1	0.519902	0.351718	0.688087	1.37e-09	7.38e-09
1117	CHI3L2	-1.16108	-1.9113	-0.41086	0.00241862	0.00503963
1118	CHIT1	0.0338808	-0.132678	0.20044	0.690122	0.750778
1119	CHKA	0.228357	-0.00296259	0.459677	0.0530072	0.0827763
1120	CHKB	-0.142904	-0.393018	0.107211	0.262786	0.338589
1121	CHM	0.0856807	-0.14759	0.318951	0.471587	0.553664
1122	CHML	0.905269	0.435714	1.37482	0.000157664	0.000409431
1123	CHN1	-0.923123	-1.09564	-0.75061	9.83e-26	2.36e-24
1124	CHN2	-0.38821	-0.730979	-0.0454404	0.0264328	0.0443047
1128	CHRM1	-1.88182	-2.92279	-0.840856	0.000395367	0.000956783
1129	CHRM2	-0.453777	-1.70702	0.799466	0.47791	0.560276
1130	LYST	-0.578429	-0.937406	-0.219451	0.00158783	0.00343726
1131	CHRM3	-0.408395	-0.811987	-0.00480282	0.0473353	0.0747751
1132	CHRM4	-0.249062	-0.812788	0.314665	0.386525	0.469439
1133	CHRM5	0.00741711	-0.203606	0.21844	0.945078	0.9579
1134	CHRNA1	0.329206	0.0930351	0.565377	0.00629407	0.0120922
1135	CHRNA2	-0.0779951	-1.14155	0.985561	0.885712	0.911361
1136	CHRNA3	-0.0289581	-0.218469	0.160553	0.764565	0.813635
1137	CHRNA4	0.241292	-0.464981	0.947566	0.50311	0.584056
1138	CHRNA5	1.08689	0.653146	1.52063	9.04e-07	3.34e-06
1140	CHRNB1	0.957827	0.599429	1.31622	1.62e-07	6.62e-07
1141	CHRNB2	0.431791	0.264168	0.599414	4.45e-07	1.71e-06
1142	CHRNB3	0.0989491	-0.0728975	0.270796	0.25909	0.334376
1143	CHRNB4	0.433957	-0.06078	0.928694	0.0855823	0.126675
1144	CHRND	0.175255	-0.0775094	0.42802	0.174163	0.237409
1145	CHRNE	0.319545	0.130585	0.508506	0.000918262	0.00207315
1146	CHRNG	0.54968	0.364762	0.734599	5.67e-09	2.83e-08
1147	CHUK	0.00252898	-0.313774	0.318832	0.987497	0.990611
1149	CIDEA	0.225275	-0.0011722	0.451723	0.0511978	0.080253
1152	CKB	-0.263746	-0.515095	-0.0123961	0.0397223	0.0639081
1153	CIRBP	-0.922678	-1.56008	-0.285275	0.00455164	0.00901164
1154	CISH	-0.277769	-0.701711	0.146172	0.199079	0.266443
1155	TBCB	0.155009	-0.176674	0.486693	0.359682	0.442044
1158	CKM	0.677096	0.24557	1.10862	0.00210271	0.00443071
1159	CKMT1B	0.891516	0.636082	1.14695	7.88e-12	5.45e-11
1160	CKMT2	0.0924877	-0.285026	0.470001	0.631103	0.700559
1161	ERCC8	0.54569	0.349382	0.741997	5.09e-08	2.21e-07
1163	CKS1B	1.59648	1.26564	1.92732	3.14e-21	5.26e-20
1164	CKS2	1.08173	0.858706	1.30475	1.97e-21	3.38e-20
1173	AP2M1	0.0247451	-0.316399	0.365889	0.886948	0.912367
1174	AP1S1	1.33387	0.933339	1.7344	6.7e-11	4.17e-10
1175	AP2S1	0.503271	0.229897	0.776644	0.000308302	0.000761605
1176	AP3S1	0.449918	0.0655521	0.834283	0.0217774	0.0371713
1178	CLC	-0.543556	-0.948171	-0.13894	0.00846359	0.0157911
1179	CLCA1	0.334046	0.119674	0.548418	0.00225721	0.00473033
1180	CLCN1	0.58397	0.340496	0.827444	2.59e-06	8.93e-06
1181	CLCN2	1.17606	0.772089	1.58002	1.16e-08	5.5e-08
1182	CLCN3	0.303233	0.055521	0.550945	0.0164282	0.0288319
1183	CLCN4	-0.882765	-1.15004	-0.615494	9.57e-11	5.86e-10
1184	CLCN5	0.00803312	-0.324892	0.340958	0.962281	0.971378
1185	CLCN6	-0.906192	-1.31683	-0.495558	1.52e-05	4.68e-05
1186	CLCN7	1.0514	0.808552	1.29424	2.14e-17	2.58e-16
1187	CLCNKA	0.445733	-0.0750339	0.966499	0.0934319	0.137094
1188	CLCNKB	0.40228	0.0260691	0.778491	0.0361019	0.0586362
1191	CLU	-0.942255	-1.19383	-0.690685	2.12e-13	1.72e-12
1192	CLIC1	0.358001	0.0476055	0.668396	0.0237862	0.0402646
1193	CLIC2	-1.01142	-1.32085	-0.701992	1.49e-10	8.93e-10
1195	CLK1	-0.651542	-1.08801	-0.21507	0.00343647	0.00694952
1196	CLK2	1.12563	0.765618	1.48564	8.89e-10	4.89e-09
1198	CLK3	-0.0300038	-0.268665	0.208657	0.805372	0.847716
1200	TPP1	-0.339987	-0.667899	-0.0120759	0.0421392	0.0673927
1201	CLN3	0.260415	0.0526305	0.4682	0.0140333	0.0249729
1203	CLN5	-0.868719	-1.30257	-0.434871	8.69e-05	0.000235667
1207	CLNS1A	1.06214	0.22112	1.90316	0.0133133	0.0238119
1208	CLPS	0.225283	-0.0300748	0.480641	0.083786	0.124364
1209	CLPTM1	0.75744	0.485079	1.0298	5.02e-08	2.18e-07
1211	CLTA	0.234132	0.0619925	0.406272	0.00768047	0.014464
1212	CLTB	-0.40733	-0.725323	-0.0893365	0.0120528	0.0217767
1213	CLTC	1.2279	0.486696	1.9691	0.00116654	0.00259019
1215	CMA1	-0.458442	-0.982269	0.0653863	0.0862878	0.127621
1230	CCR1	-0.945698	-1.18203	-0.709367	4.4e-15	4.24e-14
1232	CCR3	0.081938	-0.236707	0.400583	0.614265	0.685684
1233	CCR4	0.235639	0.0378781	0.4334	0.0195243	0.0336565
1234	CCR5	-0.131976	-0.298398	0.034447	0.120118	0.171223
1235	CCR6	0.237189	0.0704906	0.403888	0.00529104	0.0103337
1236	CCR7	0.405928	0.17845	0.633405	0.000469633	0.00111858
1237	CCR8	0.712494	0.337211	1.08778	0.000198361	0.000506773
1238	ACKR2	0.240802	0.0738302	0.407773	0.00470441	0.00929494
1240	CMKLR1	-0.766147	-1.15639	-0.375899	0.000119151	0.000315699
1241	LTB4R	0.0778725	-0.278831	0.434576	0.668737	0.732641
1244	ABCC2	0.686824	0.47414	0.899508	2.46e-10	1.44e-09
1258	CNGB1	0.620226	0.184773	1.05568	0.0052444	0.010253
1259	CNGA1	0.646057	0.477257	0.814857	6.31e-14	5.39e-13
1261	CNGA3	0.855112	0.679032	1.03119	1.76e-21	3.02e-20
1262	CNGA4	-0.804116	-1.52161	-0.0866184	0.0280507	0.0467166
1263	PLK3	-1.07259	-1.27648	-0.868694	6.32e-25	1.45e-23
1264	CNN1	-1.25337	-1.82942	-0.677316	2e-05	6.02e-05
1265	CNN2	0.0348295	-0.192387	0.262046	0.763843	0.813235
1266	CNN3	-0.803706	-1.07952	-0.527889	1.12e-08	5.34e-08
1267	CNP	1.5682	1.12318	2.01321	4.96e-12	3.5e-11
1268	CNR1	-0.839597	-1.275	-0.404191	0.0001572	0.000408475
1269	CNR2	0.355106	0.169092	0.54112	0.000182837	0.00047041
1271	CNTFR	-0.0214338	-0.725683	0.682815	0.952433	0.963554
1272	CNTN1	-0.326915	-0.824444	0.170614	0.197799	0.264964
1277	COL1A1	1.86639	1.51619	2.2166	1.54e-25	3.64e-24
1278	COL1A2	1.28858	0.952676	1.62448	5.53e-14	4.75e-13
1280	COL2A1	0.463712	0.291916	0.635507	1.22e-07	5.06e-07
1281	COL3A1	1.58651	1.20776	1.96525	2.21e-16	2.41e-15
1282	COL4A1	0.135915	-0.247661	0.519491	0.487378	0.569137
1284	COL4A2	-0.257479	-0.690896	0.175938	0.244282	0.317553
1285	COL4A3	-1.06109	-1.31301	-0.809166	1.52e-16	1.68e-15
1286	COL4A4	-0.784812	-1.1109	-0.458725	2.39e-06	8.3e-06
1287	COL4A5	-1.15776	-1.43708	-0.878436	4.52e-16	4.82e-15
1288	COL4A6	-0.958576	-1.58257	-0.33458	0.00260494	0.00539807
1289	COL5A1	1.56447	1.19085	1.93808	2.27e-16	2.47e-15
1290	COL5A2	1.55554	1.16101	1.95007	1.1e-14	1.01e-13
1291	COL6A1	-0.154338	-0.725297	0.416621	0.596247	0.669567
1292	COL6A2	-0.0983334	-0.280419	0.0837521	0.289846	0.367828
1293	COL6A3	0.744798	0.347164	1.14243	0.000241458	0.00060647
1294	COL7A1	1.09773	0.834408	1.36106	3.07e-16	3.32e-15
1295	COL8A1	-0.0114415	-0.483818	0.460935	0.962137	0.971279
1296	COL8A2	0.375182	0.0244355	0.725929	0.0360371	0.058537
1297	COL9A1	0.601921	0.428247	0.775594	1.1e-11	7.46e-11
1298	COL9A2	0.796188	0.625951	0.966424	4.88e-20	7.32e-19
1299	COL9A3	0.901011	0.724156	1.07787	1.77e-23	3.57e-22
1300	COL10A1	2.50328	1.74801	3.25854	8.24e-11	5.08e-10
1301	COL11A1	2.22962	1.5334	2.92584	3.46e-10	1.99e-09
1302	COL11A2	0.549835	0.381562	0.718107	1.51e-10	9.05e-10
1303	COL12A1	0.185576	-0.465308	0.836461	0.576289	0.651724
1305	COL13A1	-1.54467	-1.85036	-1.23898	4.01e-23	7.87e-22
1306	COL15A1	0.368704	0.0419792	0.695429	0.0269812	0.0451202
1307	COL16A1	0.381663	0.170325	0.593001	0.000400783	0.000968558
1308	COL17A1	1.06224	0.888912	1.23556	3.08e-33	1.26e-31
1310	COL19A1	0.150548	-0.0787059	0.379803	0.198065	0.265287
1311	COMP	1.29466	0.909219	1.6801	4.6e-11	2.91e-10
1312	COMT	-0.368121	-0.544635	-0.191606	4.36e-05	0.000124309
1314	COPA	1.37739	0.996214	1.75856	1.42e-12	1.06e-11
1315	COPB1	1.14536	0.518914	1.7718	0.000339015	0.000831548
1316	KLF6	-2.01251	-2.31539	-1.70963	9.04e-39	5.19e-37
1317	SLC31A1	-0.106908	-0.401593	0.187778	0.477056	0.559491
1318	SLC31A2	-1.82532	-2.01095	-1.6397	9.1e-83	5.83e-80
1326	MAP3K8	-1.60255	-1.78517	-1.41993	2.69e-66	7.47e-64
1327	COX4I1	0.00477343	-0.19843	0.207976	0.963277	0.972152
1329	COX5B	0.521888	0.229393	0.814383	0.000470363	0.00112019
1337	COX6A1	0.779983	0.525978	1.03399	1.76e-09	9.36e-09
1338	COX6A1P1	0.637985	0.353555	0.922416	1.1e-05	3.45e-05
1339	COX6A2	0.745353	0.442566	1.04814	1.4e-06	5.04e-06
1340	COX6B1	0.821886	0.497307	1.14647	6.94e-07	2.6e-06
1345	COX6C	0.901243	0.671828	1.13066	1.37e-14	1.25e-13
1346	COX7A1	-2.39469	-2.71864	-2.07074	1.43e-47	1.44e-45
1347	COX7A2	0.434866	0.155953	0.713779	0.00224406	0.00470512
1348	COX7A2P2	0.314869	-0.268456	0.898194	0.290075	0.368058
1349	COX7B	0.303243	0.1127	0.493786	0.00181327	0.00387803
1350	COX7C	0.151556	-0.155933	0.459045	0.334028	0.414954
1351	COX8A	0.710612	0.397207	1.02402	8.83e-06	2.81e-05
1352	COX10	0.735982	0.566166	0.905799	1.99e-17	2.4e-16
1353	COX11	0.437583	0.185737	0.689429	0.000660573	0.00153177
1355	COX15	0.542565	0.184618	0.900511	0.00296972	0.00608597
1356	CP	1.52911	1.14802	1.9102	3.71e-15	3.6e-14
1357	CPA1	0.214339	-0.398896	0.827573	0.493312	0.574702
1358	CPA2	0.109127	-0.094107	0.312361	0.292613	0.370893
1359	CPA3	-1.48117	-1.77427	-1.18807	3.97e-23	7.8e-22
1360	CPB1	-0.0730641	-0.337103	0.190975	0.587573	0.662218
1361	CPB2	-1.73069	-2.60415	-0.857226	0.000102964	0.000275923
1362	CPD	1.10975	0.681063	1.53843	3.9e-07	1.51e-06
1363	CPE	0.276108	0.0298184	0.522397	0.028002	0.0466428
1364	CLDN4	1.50779	1.16071	1.85487	1.67e-17	2.03e-16
1365	CLDN3	1.4544	1.04469	1.86411	3.46e-12	2.48e-11
1366	CLDN7	1.03175	0.732565	1.33093	1.39e-11	9.32e-11
1368	CPM	-0.709605	-1.05063	-0.368583	4.54e-05	0.000128858
1369	CPN1	0.292218	0.102466	0.48197	0.00254164	0.00527673
1370	CPN2	0.415932	0.248246	0.583618	1.16e-06	4.24e-06
1371	CPOX	1.1997	0.585928	1.81347	0.000127618	0.000337035
1373	CPS1	0.624172	0.380953	0.867391	4.91e-07	1.88e-06
1374	CPT1A	-0.276906	-0.760758	0.206945	0.261999	0.337739
1375	CPT1B	1.52455	0.839412	2.20969	1.29e-05	4.02e-05
1376	CPT2	0.59181	-0.0494573	1.23308	0.0704816	0.106921
1378	CR1	-0.169188	-0.527199	0.188823	0.354325	0.436348
1379	CR1L	0.422846	0.207827	0.637866	0.000116031	0.000308128
1380	CR2	0.837598	0.55421	1.12099	6.91e-09	3.4e-08
1381	CRABP1	0.776589	0.357548	1.19563	0.000280893	0.00069896
1382	CRABP2	2.05021	1.50935	2.59107	1.09e-13	9.11e-13
1384	CRAT	0.380704	0.157736	0.603672	0.000818334	0.00186427
1385	CREB1	-0.308186	-0.518965	-0.0974072	0.00416058	0.00829175
1386	ATF2	0.338335	-0.00265199	0.679323	0.0518086	0.081118
1387	CREBBP	-0.140046	-0.462187	0.182096	0.39418	0.477174
1388	ATF6B	0.655888	0.359972	0.951804	1.4e-05	4.32e-05
1389	CREBL2	-1.21209	-1.43178	-0.99239	2.98e-27	8e-26
1390	CREM	-0.771703	-1.05778	-0.485628	1.24e-07	5.15e-07
1392	CRH	0.0802765	-0.393835	0.554388	0.739994	0.793965
1393	CRHBP	-0.252007	-0.870623	0.366609	0.424618	0.507338
1394	CRHR1	-0.141914	-1.50653	1.2227	0.838489	0.874778
1395	CRHR2	0.0367443	-0.13504	0.208529	0.675047	0.737681
1396	CRIP1	-0.992871	-1.27148	-0.714258	2.86e-12	2.06e-11
1397	CRIP2	-0.603116	-0.77147	-0.434762	2.2e-12	1.61e-11
1398	CRK	-1.02159	-1.3176	-0.72559	1.34e-11	9e-11
1399	CRKL	0.0291394	-0.240414	0.298693	0.832203	0.869593
1400	CRMP1	-0.321219	-0.628777	-0.0136615	0.0406557	0.0652622
1401	CRP	0.135797	-0.0307756	0.302369	0.110078	0.158568
1404	HAPLN1	0.266954	0.0193964	0.514511	0.0345555	0.056386
1406	CRX	0.242845	0.0238873	0.461803	0.0297211	0.0492657
1407	CRY1	-1.22918	-1.6015	-0.856852	9.76e-11	5.97e-10
1408	CRY2	-1.53477	-2.00205	-1.06749	1.22e-10	7.35e-10
1410	CRYAB	-2.02076	-2.7479	-1.29362	5.13e-08	2.23e-07
1411	CRYBA1	0.0897324	-0.218134	0.397599	0.567822	0.643906
1412	CRYBA2	0.477116	0.29303	0.661201	3.78e-07	1.47e-06
1413	CRYBA4	0.329606	0.145601	0.513611	0.000446652	0.00106927
1414	CRYBB1	0.390143	0.222917	0.557369	4.82e-06	1.6e-05
1415	CRYBB2	0.220493	-0.168548	0.609533	0.266641	0.342637
1416	CRYBB2P1	0.296066	0.0623988	0.529733	0.0130151	0.0233318
1417	CRYBB3	0.477724	0.304769	0.650679	6.17e-08	2.65e-07
1418	CRYGA	0.280728	0.0647175	0.496738	0.0108598	0.0198365
1419	CRYGB	0.0292423	-0.153298	0.211783	0.753536	0.804978
1420	CRYGC	0.324855	0.0921275	0.557583	0.00622225	0.0119662
1421	CRYGD	0.176243	0.00423103	0.348255	0.0446248	0.070912
1427	CRYGS	-0.360362	-0.866171	0.145446	0.162603	0.22351
1428	CRYM	0.0898716	-0.317494	0.497237	0.66545	0.729928
1429	CRYZ	0.295961	0.128884	0.463038	0.000516803	0.00122116
1431	CS	0.791058	0.531383	1.05073	2.36e-09	1.24e-08
1432	MAPK14	0.402878	0.169472	0.636284	0.000716837	0.00165245
1434	CSE1L	1.17391	0.816225	1.53159	1.25e-10	7.57e-10
1435	CSF1	-0.241776	-0.505749	0.0221973	0.0726295	0.109825
1436	CSF1R	-0.155685	-0.502816	0.191445	0.379385	0.462388
1437	CSF2	0.01355	-0.419962	0.447062	0.951151	0.96265
1438	CSF2RA	-0.265643	-0.538025	0.00673989	0.0559447	0.0869077
1439	CSF2RB	-1.28889	-1.46634	-1.11145	5.46e-46	4.98e-44
1440	CSF3	-1.26967	-1.54369	-0.995644	1.07e-19	1.56e-18
1441	CSF3R	-1.22689	-1.40289	-1.05089	1.69e-42	1.24e-40
1442	CSH1	0.0439783	-0.138839	0.226796	0.637294	0.706023
1443	CSH2	0.0865962	-0.0962175	0.26941	0.353197	0.435111
1444	CSHL1	0.440917	0.142537	0.739298	0.00377663	0.0075852
1445	CSK	0.0664865	-0.274996	0.407969	0.702755	0.762168
1446	CSN1S1	0.107941	-0.201716	0.417598	0.494476	0.575804
1447	CSN2	0.180911	0.00897235	0.352849	0.0391847	0.0631165
1448	CSN3	-0.109752	-0.281668	0.062163	0.21084	0.279953
1452	CSNK1A1	0.310418	0.133484	0.487352	0.000584712	0.00136984
1453	CSNK1D	0.574804	-0.0752084	1.22482	0.0830619	0.123419
1454	CSNK1E	0.879095	-0.0991215	1.85731	0.0781769	0.117066
1455	CSNK1G2	0.117302	-0.221875	0.456479	0.497874	0.579089
1456	CSNK1G3	0.308058	-0.000707295	0.616822	0.0505271	0.0792958
1457	CSNK2A1	1.29087	0.838561	1.74318	2.22e-08	1.02e-07
1459	CSNK2A2	-0.305081	-0.68974	0.0795778	0.120068	0.171163
1460	CSNK2B	0.962982	0.791056	1.13491	4.87e-28	1.39e-26
1462	VCAN	1.0321	0.576311	1.48789	9.07e-06	2.88e-05
1463	NCAN	0.477041	0.193576	0.760505	0.000972343	0.00218824
1464	CSPG4	-0.949987	-1.12261	-0.777362	4.01e-27	1.06e-25
1465	CSRP1	-1.92236	-2.18769	-1.65702	9.18e-46	8.22e-44
1466	CSRP2	-0.587718	-0.959617	-0.215819	0.00195251	0.00414354
1468	SLC25A10	1.95632	1.34592	2.56671	3.35e-10	1.93e-09
1469	CST1	1.58808	1.21093	1.96523	1.55e-16	1.71e-15
1470	CST2	1.0494	0.858904	1.23989	3.55e-27	9.44e-26
1471	CST3	-0.600008	-0.810884	-0.389133	2.45e-08	1.11e-07
1472	CST4	0.678413	0.278356	1.07847	0.000888361	0.00201123
1473	CST5	-0.824013	-1.2214	-0.426629	4.82e-05	0.000136293
1474	CST6	-0.562597	-0.817497	-0.307697	1.52e-05	4.67e-05
1475	CSTA	-1.30285	-2.16338	-0.44232	0.00300327	0.00614697
1476	CSTB	0.371817	0.204351	0.539282	1.35e-05	4.19e-05
1477	CSTF1	0.694781	0.232261	1.1573	0.00323802	0.00658602
1478	CSTF2	1.80733	1.36755	2.24711	7.97e-16	8.29e-15
1479	CSTF3	0.956882	0.632034	1.28173	7.77e-09	3.79e-08
1482	NKX2-5	0.527931	0.313895	0.741966	1.34e-06	4.82e-06
1485	CTAG1B	-0.173746	-1.41454	1.06705	0.783738	0.829654
1486	CTBS	0.0850013	-0.367597	0.5376	0.712802	0.770889
1487	CTBP1	0.42103	-0.0129345	0.854995	0.0572305	0.0886771
1488	CTBP2	0.290575	-0.113788	0.694938	0.159004	0.219305
1489	CTF1	-0.286844	-0.619263	0.0455745	0.0907883	0.133632
1490	CTGF	-1.21787	-1.54902	-0.886726	5.67e-13	4.41e-12
1491	CTH	0.281715	-0.404454	0.967884	0.421	0.503774
1493	CTLA4	0.692604	0.401943	0.983266	3.01e-06	1.03e-05
1495	CTNNA1	-0.151197	-0.317908	0.0155149	0.0754759	0.113568
1496	CTNNA2	0.212803	0.0461818	0.379423	0.0123075	0.0221894
1497	CTNS	-0.134624	-0.301168	0.0319187	0.113119	0.162533
1498	CTNNA1P1	0.514295	0.1776	0.85099	0.00275523	0.0056811
1499	CTNNB1	0.0467381	-0.210214	0.303691	0.721462	0.778265
1500	CTNND1	-0.244473	-0.557911	0.0689656	0.126335	0.179072
1501	CTNND2	-0.0436761	-0.472425	0.385073	0.841747	0.877095
1503	CTPS1	0.879458	0.695135	1.06378	8.64e-21	1.38e-19
1506	CTRL	0.00166872	-0.342463	0.3458	0.992417	0.994274
1508	CTSB	0.319078	0.109098	0.529058	0.00289862	0.0059547
1509	CTSD	-0.165221	-0.413336	0.0828954	0.191845	0.257986
1510	CTSE	-0.213383	-0.380165	-0.0466001	0.0121558	0.021942
1511	CTSG	-0.853524	-1.26402	-0.443024	4.6e-05	0.000130349
1512	CTSH	-1.03236	-1.38722	-0.677497	1.18e-08	5.62e-08
1513	CTSK	0.620793	0.452075	0.789511	5.53e-13	4.31e-12
1514	CTSL	-0.707606	-1.28665	-0.128557	0.0166156	0.0291269
1515	CTSV	0.753807	0.0244982	1.48312	0.0427852	0.0683277
1519	CTSO	-1.27027	-1.44692	-1.09361	4.16e-45	3.57e-43
1520	CTSS	-0.910112	-1.16177	-0.658458	1.36e-12	1.02e-11
1521	CTSW	-1.09347	-1.32139	-0.865551	5.29e-21	8.67e-20
1522	CTSZ	-0.268881	-0.435625	-0.102138	0.00157485	0.00341162
1523	CUX1	-0.425639	-0.686723	-0.164555	0.00139693	0.00305719
1524	CX3CR1	-1.47911	-1.89615	-1.06207	3.62e-12	2.59e-11
1525	CXADR	0.155832	-0.126987	0.438651	0.280173	0.357311
1528	CYB5A	-1.26582	-1.52431	-1.00733	8.16e-22	1.45e-20
1532	CYB5AP4	-0.893274	-1.42647	-0.360076	0.00102508	0.0022981
1534	CYB561	0.988268	0.464972	1.51157	0.000214348	0.000543676
1535	CYBA	0.131535	-0.0700078	0.333078	0.200843	0.268549
1536	CYBB	-1.02262	-1.25277	-0.792467	3.08e-18	3.95e-17
1537	CYC1	1.24661	0.951816	1.54141	1.15e-16	1.3e-15
1538	CYLC1	0.287723	0.100146	0.475301	0.0026439	0.00547128
1539	CYLC2	-0.0823146	-0.276899	0.11227	0.407038	0.490073
1540	CYLD	-1.0437	-1.30155	-0.785841	2.14e-15	2.13e-14
1543	CYP1A1	-0.220937	-0.578649	0.136775	0.226068	0.297424
1544	CYP1A2	-0.646128	-1.65546	0.363202	0.209594	0.278594
1545	CYP1B1	0.475212	0.0911854	0.859238	0.0152937	0.0269999
1548	CYP2A6	0.146623	-0.268282	0.561528	0.488542	0.570119
1549	CYP2A7	0.282574	-0.355341	0.920489	0.385288	0.468245
1550	CYP2A7P1	0.206216	-0.0424318	0.454864	0.104057	0.150976
1551	CYP3A7	-1.26696	-1.98704	-0.546894	0.000563593	0.00132432
1553	CYP2A13	0.0371004	-0.357165	0.431366	0.853674	0.886368
1555	CYP2B6	0.0529028	-0.316001	0.421807	0.778657	0.825556
1556	CYP2B7P	-0.864226	-1.27373	-0.454719	3.53e-05	0.000102166
1557	CYP2C19	0.174304	-0.0105574	0.359165	0.064598	0.0987823
1558	CYP2C8	-0.215349	-0.381888	-0.048809	0.0112645	0.0204925
1559	CYP2C9	0.307839	0.140616	0.475062	0.000308481	0.000761958
1562	CYP2C18	0.255886	0.0222734	0.489498	0.0318065	0.052353
1564	CYP2D7	0.991509	0.493561	1.48946	9.51e-05	0.000256357
1565	CYP2D6	0.442216	-0.776797	1.66123	0.477079	0.559491
1571	CYP2E1	0.326665	0.0663798	0.58695	0.0139012	0.0247523
1573	CYP2J2	0.71925	0.488454	0.950047	1.01e-09	5.51e-09
1576	CYP3A4	0.216179	0.0494108	0.382948	0.011064	0.0201607
1577	CYP3A5	-0.800591	-1.1621	-0.439079	1.42e-05	4.39e-05
1579	CYP4A11	-0.298755	-0.686381	0.0888721	0.130891	0.184785
1580	CYP4B1	-1.72504	-2.24711	-1.20297	9.41e-11	5.76e-10
1581	CYP7A1	-0.568884	-1.00276	-0.135006	0.0101749	0.0186953
1582	CYP8B1	0.177718	-0.00916609	0.364602	0.0623451	0.0957319
1583	CYP11A1	-0.00034282	-0.338939	0.338253	0.998417	0.998747
1584	CYP11B1	0.388991	-0.000388789	0.778371	0.0502292	0.0788868
1585	CYP11B2	0.331304	0.0985719	0.564037	0.00526933	0.0102947
1586	CYP17A1	-0.0912171	-0.773343	0.590908	0.793247	0.837079
1587	ADAM3A	0.17024	0.00301847	0.337462	0.0460055	0.0729087
1588	CYP19A1	0.372204	0.165451	0.578957	0.000418077	0.00100633
1589	CYP21A2	0.0748877	-0.409647	0.559422	0.761948	0.811912
1591	CYP24A1	1.28854	0.874906	1.70218	1.02e-09	5.58e-09
1592	CYP26A1	0.630584	0.44694	0.814229	1.7e-11	1.13e-10
1593	CYP27A1	-1.54234	-2.1235	-0.961172	1.98e-07	7.98e-07
1594	CYP27B1	1.38114	0.925597	1.83669	2.81e-09	1.46e-08
1595	CYP51A1	-0.98705	-1.34028	-0.633821	4.33e-08	1.9e-07
1600	DAB1	-0.00154036	-0.40599	0.40291	0.994044	0.995397
1601	DAB2	-1.55274	-1.73417	-1.37131	3.77e-63	9.26e-61
1602	DACH1	-2.30861	-3.09455	-1.52266	8.56e-09	4.15e-08
1603	DAD1	0.338057	0.0686984	0.607416	0.0138999	0.0247521
1604	CD55	-0.83944	-1.01074	-0.668139	7.65e-22	1.36e-20
1605	DAG1	-0.0555343	-0.246902	0.135834	0.569509	0.645601
1606	DGKA	0.806368	0.59494	1.0178	7.71e-14	6.52e-13
1607	DGKB	0.0511803	-0.120517	0.222878	0.559063	0.636328
1608	DGKG	-0.422578	-0.590072	-0.255083	7.62e-07	2.84e-06
1609	DGKQ	0.348226	0.0156864	0.680766	0.040129	0.0644901
1610	DAO	-0.17934	-0.781379	0.422699	0.559322	0.636588
1611	DAP	1.67727	1.38162	1.97292	1.01e-28	3.04e-27
1612	DAPK1	-1.39466	-1.57338	-1.21595	8.22e-53	1.06e-50
1613	DAPK3	-0.180441	-0.445287	0.084404	0.181765	0.246106
1615	DARS	1.18949	0.746907	1.63207	1.38e-07	5.69e-07
1616	DAXX	0.655843	0.440025	0.871661	2.58e-09	1.35e-08
1618	DAZL	0.548304	0.0800014	1.01661	0.0217452	0.0371307
1620	BRINP1	0.00201256	-0.200874	0.204899	0.984488	0.988333
1621	DBH	-0.218809	-0.43031	-0.00730677	0.0425934	0.0680574
1622	DBI	-0.666366	-1.0153	-0.317427	0.000181888	0.00046831
1627	DBN1	1.25119	0.969783	1.53261	2.93e-18	3.77e-17
1628	DBP	0.512378	0.273091	0.751665	2.71e-05	7.96e-05
1629	DBT	0.0260325	-0.208931	0.260996	0.82809	0.866151
1630	DCC	-0.95931	-1.89433	-0.0242914	0.0443378	0.0705301
1632	ECI1	0.530812	0.362684	0.69894	6.09e-10	3.42e-09
1633	DCK	0.277075	0.0719538	0.482196	0.0081091	0.0151967
1634	DCN	-1.51734	-1.71538	-1.31929	5.73e-51	6.84e-49
1635	DCTD	0.403184	0.235568	0.5708	2.42e-06	8.4e-06
1636	ACE	-1.78218	-2.30248	-1.26188	1.9e-11	1.25e-10
1638	DCT	0.0337161	-0.227371	0.294803	0.800188	0.843182
1639	DCTN1	-0.472233	-0.766957	-0.177509	0.00168703	0.00363184
1641	DCX	0.1404	-0.0316751	0.312475	0.109781	0.158227
1642	DDB1	1.05078	0.541533	1.56003	5.25e-05	0.000147314
1643	DDB2	-0.641679	-0.876434	-0.406923	8.45e-08	3.57e-07
1644	DDC	0.107614	-0.215717	0.430946	0.514186	0.594791
1645	AKR1C1	0.0102718	-0.210014	0.230558	0.927181	0.944379
1646	AKR1C2	0.178462	0.0017436	0.355181	0.047782	0.0754301
1647	GADD45A	0.194928	-0.00475025	0.394606	0.0557049	0.0865988
1649	DDIT3	0.495807	0.327788	0.663825	7.31e-09	3.59e-08
1650	DDOST	1.78997	1.51199	2.06796	1.63e-36	8.32e-35
1652	DDT	0.183469	-0.0736293	0.440566	0.161916	0.222696
1653	DDX1	0.395552	0.0701054	0.720999	0.0172112	0.0300612
1654	DDX3X	-0.346271	-0.7286	0.0360582	0.0758787	0.114101
1655	DDX5	-1.07885	-1.52052	-0.637186	1.69e-06	6e-06
1656	DDX6	0.286148	-0.0610768	0.633373	0.106266	0.153738
1657	DMXL1	-1.24344	-1.61524	-0.871649	5.56e-11	3.49e-10
1659	DHX8	0.904237	0.556731	1.25174	3.4e-07	1.33e-06
1660	DHX9	0.577023	0.321687	0.832358	9.46e-06	3e-05
1661	DHX9P1	0.499134	0.109714	0.888555	0.0119996	0.0216917
1662	DDX10	0.801454	0.621651	0.981257	2.41e-18	3.13e-17
1663	DDX11	1.18352	0.79066	1.57637	3.54e-09	1.81e-08
1665	DHX15	0.626287	0.361972	0.890602	3.42e-06	1.16e-05
1666	DECR1	-0.468065	-0.659361	-0.276769	1.62e-06	5.77e-06
1669	DEFA4	-0.688758	-1.0019	-0.375614	1.63e-05	4.97e-05
1670	DEFA5	0.144588	-0.0272672	0.316444	0.0991499	0.144581
1671	DEFA6	0.113824	-0.0580187	0.285666	0.19421	0.260668
1672	DEFB1	0.0616057	-0.110229	0.233441	0.482256	0.564301
1674	DES	-2.05071	-2.64202	-1.4594	1.07e-11	7.24e-11
1675	CFD	-2.81684	-3.31546	-2.31823	1.71e-28	5.04e-27
1676	DFFA	0.730925	0.466312	0.995537	6.17e-08	2.65e-07
1677	DFFB	0.229249	-0.179122	0.63762	0.271212	0.347497
1678	TIMM8A	1.13848	0.650721	1.62623	4.77e-06	1.58e-05
1687	DFNA5	0.333593	0.0912501	0.575935	0.00697666	0.0132841
1690	COCH	0.84813	0.217093	1.47917	0.00843256	0.0157429
1716	DGUOK	0.784397	0.466624	1.10217	1.31e-06	4.74e-06
1717	DHCR7	0.719348	0.244415	1.19428	0.00299138	0.00612561
1718	DHCR24	-1.11111	-1.4552	-0.767019	2.47e-10	1.44e-09
1719	DHFR	1.4725	0.691164	2.25383	0.00022098	0.00055882
1720	DHFRP3	0.0228276	-0.200077	0.245733	0.840918	0.876533
1723	DHODH	0.288815	0.00697089	0.570659	0.0445965	0.0708724
1725	DHPS	-0.169584	-0.35873	0.0195615	0.0788728	0.117983
1727	CYB5R3	-1.37446	-1.70009	-1.04882	1.31e-16	1.47e-15
1728	NQO1	1.65846	1.09887	2.21806	6.3e-09	3.12e-08
1729	DIAPH1	-0.306212	-0.530458	-0.081966	0.00744252	0.0140786
1730	DIAPH2	-1.3647	-1.71008	-1.01932	9.61e-15	8.9e-14
1731	SEPT1	0.0843051	-0.23499	0.4036	0.604808	0.67713
1733	DIO1	0.258024	0.0203957	0.495652	0.0333214	0.0545873
1734	DIO2	1.01474	0.749287	1.2802	6.77e-14	5.75e-13
1735	DIO3	-0.0480595	-0.379289	0.28317	0.77612	0.823361
1736	DKC1	1.57416	1.03061	2.11771	1.38e-08	6.48e-08
1737	DLAT	0.81461	0.378871	1.25035	0.000248177	0.000622237
1738	DLD	-0.359899	-0.710946	-0.00885276	0.0444957	0.0707441
1739	DLG1	-0.0281091	-0.320438	0.26422	0.850515	0.883748
1740	DLG2	0.416033	-0.0044303	0.836496	0.0524633	0.0820178
1741	DLG3	1.5286	1.22525	1.83195	5.27e-23	1.02e-21
1742	DLG4	-0.0539521	-0.431519	0.323615	0.779426	0.825998
1743	DLST	0.115344	-0.172703	0.403391	0.432551	0.515389
1745	DLX1	0.407566	0.0938008	0.721332	0.0108997	0.0199059
1746	DLX2	0.430382	0.262811	0.597953	4.81e-07	1.84e-06
1747	DLX3	1.02041	0.740698	1.30012	8.67e-13	6.61e-12
1748	DLX4	0.887838	0.639228	1.13645	2.57e-12	1.86e-11
1749	DLX5	0.679031	0.389562	0.968499	4.27e-06	1.43e-05
1750	DLX6	0.632893	0.290258	0.975529	0.000294247	0.000729526
1755	DMBT1	-1.00014	-1.17818	-0.8221	3.42e-28	9.91e-27
1756	DMD	-1.25192	-1.63454	-0.869303	1.43e-10	8.58e-10
1757	SARDH	0.523433	0.276188	0.770679	3.33e-05	9.69e-05
1758	DMP1	-0.0903596	-1.00908	0.828357	0.847139	0.88124
1759	DNM1	0.604928	0.271674	0.938182	0.000374031	0.000909942
1760	DMPK	-0.746394	-1.02593	-0.466857	1.66e-07	6.78e-07
1761	DMRT1	0.395937	0.197713	0.594162	9.05e-05	0.000244542
1762	DMWD	0.00537513	-0.273523	0.284273	0.969868	0.97745
1763	DNA2	1.41916	0.924058	1.91426	1.93e-08	8.91e-08
1767	DNAH5	0.227424	-0.00370907	0.458556	0.0537915	0.0838709
1768	DNAH6	-0.538179	-0.94398	-0.132379	0.00934044	0.0172867
1769	DNAH8	0.273247	-0.149127	0.695621	0.204811	0.272957
1770	DNAH9	-0.802203	-1.38217	-0.222237	0.00670802	0.0128118
1773	DNASE1	1.19847	0.773445	1.6235	3.26e-08	1.46e-07
1774	DNASE1L1	-0.123314	-0.421243	0.174615	0.417229	0.499838
1775	DNASE1L2	0.773154	0.514801	1.03151	4.48e-09	2.26e-08
1776	DNASE1L3	-1.86699	-2.4136	-1.32038	2.17e-11	1.42e-10
1777	DNASE2	-0.00450171	-0.311139	0.302136	0.977045	0.982796
1778	DYNC1H1	0.0496483	-0.300447	0.399744	0.781051	0.827315
1780	DYNC1I1	0.255451	0.0886679	0.422234	0.00268254	0.00554365
1781	DYNC1I2	-0.730081	-1.30994	-0.15022	0.0135979	0.0242613
1783	DYNC1LI2	-0.361857	-0.648874	-0.0748404	0.0134725	0.0240701
1785	DNM2	-0.609306	-0.777713	-0.440899	1.33e-12	9.96e-12
1786	DNMT1	0.942977	0.521006	1.36495	1.19e-05	3.71e-05
1787	TRDMT1	-0.817505	-0.988387	-0.646622	6.82e-21	1.1e-19
1788	DNMT3A	1.52081	1.11807	1.92354	1.35e-13	1.11e-12
1789	DNMT3B	1.49363	1.29617	1.69109	1e-49	1.12e-47
1791	DNTT	0.23358	-0.0601965	0.527357	0.119149	0.170014
1793	DOCK1	0.154127	-0.529753	0.838007	0.658692	0.724188
1794	DOCK2	-1.1075	-1.2813	-0.933691	8.58e-36	4.17e-34
1795	DOCK3	0.485361	0.156174	0.814547	0.00385463	0.00772952
1796	DOK1	-0.519149	-0.83094	-0.207359	0.00110062	0.00245419
1797	DXO	0.714518	0.50192	0.927115	4.48e-11	2.84e-10
1798	DPAGT1	1.41923	1.03699	1.80146	3.41e-13	2.7e-12
1800	DPEP1	0.88527	0.601157	1.16938	1.01e-09	5.54e-09
1801	DPH1	0.12159	-0.128487	0.371667	0.340614	0.421772
1802	DPH2	1.37858	1.04411	1.71306	6.56e-16	6.87e-15
1803	DPP4	0.638198	0.0701132	1.20628	0.027675	0.0461417
1804	DPP6	-1.16905	-1.92551	-0.412595	0.00245373	0.00510575
1805	DPT	-1.14573	-1.45196	-0.839507	2.25e-13	1.82e-12
1806	DPYD	-0.759463	-0.929428	-0.589498	1.99e-18	2.6e-17
1807	DPYS	-0.379332	-0.633456	-0.125209	0.00343732	0.00694993
1808	DPYSL2	-1.85601	-2.42739	-1.28463	1.93e-10	1.15e-09
1809	DPYSL3	-0.108183	-0.344351	0.127986	0.369288	0.452245
1810	DR1	0.424352	0.126003	0.722701	0.00530804	0.0103627
1811	SLC26A3	0.106091	-0.308545	0.520727	0.61603	0.686892
1812	DRD1	-0.429052	-0.739208	-0.118896	0.00670197	0.0128014
1813	DRD2	0.322476	0.0796068	0.565345	0.00925751	0.0171483
1814	DRD3	0.348485	0.0990492	0.597921	0.00617669	0.011884
1815	DRD4	0.448403	0.245089	0.651717	1.54e-05	4.73e-05
1816	DRD5	0.279231	0.00950007	0.548962	0.0424588	0.0678696
1819	DRG2	0.316125	0.104202	0.528049	0.00345933	0.00699375
1820	ARID3A	0.653629	0.484271	0.822987	3.9e-14	3.4e-13
1821	DRP2	0.735895	0.19599	1.2758	0.00755251	0.0142611
1822	ATN1	-0.184222	-0.472176	0.103731	0.209874	0.27886
1823	DSC1	0.202258	0.0149579	0.389559	0.0343034	0.0560222
1824	DSC2	0.591476	0.271816	0.911136	0.000287199	0.000713308
1825	DSC3	0.122226	-0.0935325	0.337984	0.266867	0.342822
1826	DSCAM	0.405093	-0.0204879	0.830674	0.062096	0.0953772
1827	RCAN1	-1.28758	-1.79671	-0.778453	7.17e-07	2.68e-06
1828	DSG1	0.353971	0.186635	0.521307	3.38e-05	9.82e-05
1829	DSG2	1.62484	1.18077	2.06891	7.42e-13	5.7e-12
1830	DSG3	0.28881	0.0930725	0.484548	0.00382898	0.00768303
1831	TSC22D3	-1.16841	-1.4825	-0.854326	3.07e-13	2.44e-12
1832	DSP	1.57814	1.15917	1.9971	1.55e-13	1.27e-12
1833	EPYC	0.878088	0.700982	1.05519	2.54e-22	4.7e-21
1834	DSPP	0.183222	-0.211536	0.577981	0.362983	0.445402
1836	SLC26A2	-0.790854	-0.963219	-0.618489	2.41e-19	3.41e-18
1837	DTNA	-0.373984	-0.631632	-0.116336	0.00444186	0.00881144
1838	DTNB	0.261883	-0.0324218	0.556188	0.081151	0.120954
1839	HBEGF	-2.10431	-2.36657	-1.84205	9.97e-56	1.56e-53
1840	DTX1	0.0646988	-0.165035	0.294433	0.580966	0.656101
1841	DTYMK	1.77296	1.27637	2.26955	2.6e-12	1.89e-11
1842	ECM2	-1.49521	-1.67512	-1.31529	1.19e-59	2.48e-57
1843	DUSP1	-1.67689	-2.17039	-1.18338	2.74e-11	1.78e-10
1844	DUSP2	-0.426245	-0.749567	-0.102924	0.0097694	0.0179987
1845	DUSP3	-0.837786	-1.16529	-0.510284	5.34e-07	2.03e-06
1846	DUSP4	0.815639	0.630572	1.00071	5.72e-18	7.18e-17
1847	DUSP5	0.0505727	-0.156407	0.257553	0.632017	0.701352
1848	DUSP6	-0.554924	-0.737258	-0.37259	2.45e-09	1.28e-08
1849	DUSP7	-0.690888	-0.871288	-0.510488	6.09e-14	5.21e-13
1850	DUSP8	-0.315582	-0.726096	0.0949329	0.131884	0.185901
1852	DUSP9	0.799294	0.502806	1.09578	1.27e-07	5.23e-07
1854	DUT	-0.0719154	-0.399877	0.256046	0.667355	0.731392
1855	DVL1	0.558621	0.385329	0.731912	2.65e-10	1.54e-09
1856	DVL2	0.771339	0.41316	1.12952	2.43e-05	7.22e-05
1857	DVL3	0.461086	-0.339818	1.26199	0.259166	0.334454
1859	DYRK1A	-0.630992	-0.800488	-0.461495	2.95e-13	2.35e-12
1861	TOR1A	0.139684	-0.0268877	0.306256	0.100261	0.145949
1869	E2F1	1.00431	0.788826	1.21979	6.55e-20	9.69e-19
1870	E2F2	1.00362	0.488338	1.5189	0.000134842	0.00035474
1871	E2F3	1.37701	0.921823	1.83219	3.04e-09	1.57e-08
1874	E2F4	0.723953	0.532558	0.915348	1.23e-13	1.02e-12
1875	E2F5	1.23131	0.761128	1.70149	2.86e-07	1.13e-06
1876	E2F6	0.777379	0.0846718	1.47009	0.0278398	0.0463909
1877	E4F1	0.559428	0.201527	0.917328	0.00218704	0.00459465
1879	EBF1	-1.4273	-1.62764	-1.22697	2.6e-44	2.12e-42
1880	GPR183	-0.295424	-0.462498	-0.12835	0.000528955	0.00124737
1889	ECE1	0.0262282	-0.241582	0.294038	0.847781	0.881687
1890	TYMP	0.553144	0.379101	0.727186	4.69e-10	2.66e-09
1891	ECH1	0.0780743	-0.0937433	0.249892	0.373137	0.456009
1892	ECHS1	0.956128	0.783933	1.12832	1.39e-27	3.84e-26
1893	ECM1	0.48405	0.16148	0.80662	0.00327017	0.00664437
1894	ECT2	1.83986	1.13814	2.54158	2.76e-07	1.09e-06
1896	EDA	-0.404318	-0.742364	-0.0662721	0.0190677	0.0329516
1901	S1PR1	-3.06959	-3.53596	-2.60321	4.49e-38	2.5e-36
1902	LPAR1	-0.444078	-0.86961	-0.0185451	0.0408173	0.0654519
1903	S1PR3	0.163074	-0.0595834	0.385731	0.151152	0.209734
1906	EDN1	-1.6062	-1.9557	-1.25669	2.11e-19	3e-18
1907	EDN2	0.811447	0.640597	0.982297	1.29e-20	2.04e-19
1908	EDN3	-0.696889	-1.29158	-0.102202	0.0216302	0.0369492
1909	EDNRA	-1.37031	-1.73496	-1.00566	1.77e-13	1.44e-12
1910	EDNRB	-3.29898	-3.71375	-2.8842	8.68e-55	1.29e-52
1911	PHC1	-0.205625	-1.0486	0.637347	0.632586	0.701763
1912	PHC2	0.477249	0.229521	0.724977	0.000159445	0.000413648
1915	EEF1A1	-1.15654	-1.83973	-0.473345	0.000906924	0.00204996
1917	EEF1A2	1.17949	0.958007	1.40098	1.67e-25	3.96e-24
1936	EEF1D	0.977213	0.635197	1.31923	2.14e-08	9.81e-08
1938	EEF2	0.0573924	-0.108902	0.223687	0.498765	0.579777
1939	EIF2D	0.360278	0.183081	0.537474	6.75e-05	0.000186246
1942	EFNA1	0.39395	0.226431	0.561469	4.04e-06	1.36e-05
1943	EFNA2	0.572892	0.189472	0.956312	0.00340593	0.00689238
1944	EFNA3	1.69031	1.11536	2.26526	8.3e-09	4.03e-08
1945	EFNA4	2.57829	1.88188	3.27471	3.98e-13	3.14e-12
1946	EFNA5	0.904952	0.607345	1.20256	2.53e-09	1.32e-08
1947	EFNB1	-0.694523	-1.28946	-0.0995853	0.0221353	0.0377115
1948	EFNB2	-0.971219	-1.43593	-0.506504	4.2e-05	0.000120078
1949	EFNB3	0.362919	0.031407	0.694431	0.0319011	0.0524882
1950	EGF	0.760418	0.467084	1.05375	3.76e-07	1.46e-06
1951	CELSR3	1.45046	0.799953	2.10096	1.24e-05	3.86e-05
1952	CELSR2	0.529989	0.361454	0.698523	7.12e-10	3.96e-09
1953	MEGF6	-0.334932	-0.770552	0.100687	0.131825	0.185831
1954	MEGF8	0.266002	0.0200151	0.51199	0.0340534	0.0556546
1955	MEGF9	-0.900252	-1.26849	-0.532016	1.65e-06	5.88e-06
1956	EGFR	0.436062	0.0765161	0.795607	0.0174508	0.0304323
1958	EGR1	-1.2084	-1.43036	-0.986444	1.4e-26	3.56e-25
1959	EGR2	-1.0616	-1.52823	-0.594962	8.24e-06	2.64e-05
1960	EGR3	-0.930908	-1.34173	-0.520091	8.94e-06	2.85e-05
1961	EGR4	0.508962	0.340477	0.677448	3.21e-09	1.65e-08
1962	EHHADH	0.163325	-0.00875379	0.335404	0.0628489	0.0963911
1964	EIF1AX	-0.454961	-0.673611	-0.236311	4.54e-05	0.000128891
1965	EIF2S1	-0.0516735	-0.349178	0.245831	0.733536	0.788633
1967	EIF2B1	0.293756	-0.355187	0.942699	0.374963	0.457843
1968	EIF2S3	0.833276	0.642436	1.02412	1.15e-17	1.41e-16
1969	EPHA2	-0.24193	-0.454616	-0.0292441	0.0257835	0.0433058
1973	EIF4A1	0.502764	-0.292784	1.29831	0.215478	0.28516
1974	EIF4A2	-0.456553	-0.786954	-0.126151	0.00676286	0.0129072
1975	EIF4B	-0.0548294	-0.304859	0.195201	0.667339	0.731392
1977	EIF4E	-0.0875965	-0.553515	0.378321	0.712508	0.77065
1978	EIF4EBP1	1.3839	1.01286	1.75494	2.67e-13	2.14e-12
1979	EIF4EBP2	-1.16619	-1.58956	-0.742818	6.71e-08	2.87e-07
1981	EIF4G1	0.942756	0.763179	1.12233	7.85e-25	1.78e-23
1982	EIF4G2	0.272233	-0.0435089	0.587974	0.0910504	0.133999
1983	EIF5	-0.502968	-0.96979	-0.0361462	0.0347101	0.0565902
1984	EIF5A	0.583574	0.265098	0.902049	0.000328871	0.000808732
1990	CELA1	-0.09698	-0.3837	0.18974	0.507371	0.58832
1991	ELANE	-0.355307	-0.527854	-0.182759	5.44e-05	0.000152233
1992	SERPINB1	-0.408097	-0.723364	-0.0928298	0.0111784	0.0203498
1993	ELAVL2	0.460198	0.190199	0.730198	0.000835853	0.00190151
1994	ELAVL1	0.38606	0.0767108	0.695409	0.0144457	0.0256269
1995	ELAVL3	0.33694	-0.0662913	0.740171	0.101475	0.147574
1996	ELAVL4	0.627887	0.272901	0.982872	0.000526854	0.00124269
1997	ELF1	-0.729877	-1.07596	-0.38379	3.57e-05	0.000103362
1998	ELF2	-0.642473	-0.940375	-0.344571	2.37e-05	7.03e-05
1999	ELF3	0.532839	0.219269	0.846408	0.000866886	0.00196809
2000	ELF4	-0.432222	-0.5998	-0.264644	4.3e-07	1.66e-06
2001	ELF5	-0.38488	-0.67926	-0.0905003	0.0103918	0.0190674
2002	ELK1	0.878518	0.707107	1.04993	9.64e-24	1.99e-22
2004	ELK3	-0.412989	-0.628373	-0.197604	0.000171189	0.000442108
2005	ELK4	0.710925	0.541535	0.880316	1.94e-16	2.13e-15
2006	ELN	-0.604279	-0.773165	-0.435392	2.34e-12	1.7e-11
2009	EML1	-1.88859	-2.4738	-1.30338	2.53e-10	1.48e-09
2010	EMD	0.405217	0.232151	0.578283	4.45e-06	1.48e-05
2011	MARK2	1.04645	0.857078	1.23582	2.46e-27	6.69e-26
2012	EMP1	-1.4523	-1.63212	-1.27248	1.95e-56	3.25e-54
2013	EMP2	-3.21341	-3.60958	-2.81724	6.6e-57	1.15e-54
2014	EMP3	-1.48116	-1.86648	-1.09584	4.92e-14	4.27e-13
2015	ADGRE1	-1.77246	-2.40302	-1.1419	3.6e-08	1.6e-07
2016	EMX1	0.56489	0.396349	0.733431	5.06e-11	3.19e-10
2017	CTTN	1.26085	0.776471	1.74524	3.36e-07	1.32e-06
2018	EMX2	0.148908	-0.161624	0.45944	0.347294	0.428963
2019	EN1	0.0985162	-0.273675	0.470707	0.603909	0.676231
2020	EN2	0.879319	0.631308	1.12733	3.68e-12	2.63e-11
2021	ENDOG	0.182497	-0.0218298	0.386825	0.0800206	0.11948
2022	ENG	-1.61545	-2.50278	-0.728112	0.000359393	0.000877359
2023	ENO1	1.98661	1.47858	2.49465	1.8e-14	1.62e-13
2026	ENO2	0.747332	0.458385	1.03628	3.99e-07	1.55e-06
2027	ENO3	0.777052	0.601419	0.952684	4.26e-18	5.43e-17
2028	ENPEP	-0.603945	-0.871623	-0.336268	9.77e-06	3.09e-05
2029	ENSA	0.425862	0.258292	0.593433	6.32e-07	2.38e-06
2030	SLC29A1	0.277955	0.111044	0.444865	0.00109886	0.00245052
2033	EP300	-0.37515	-0.580161	-0.170139	0.000335095	0.000822697
2034	EPAS1	-2.71359	-3.18665	-2.24053	2.51e-29	7.88e-28
2035	EPB41	0.736193	0.37793	1.09446	5.64e-05	0.000157482
2036	EPB41L1	-0.279608	-0.523917	-0.0352983	0.0248875	0.0419375
2037	EPB41L2	-1.79892	-2.00171	-1.59614	1.03e-67	3.11e-65
2038	EPB42	-0.202543	-0.949915	0.544828	0.595304	0.66897
2039	DMTN	-0.575869	-0.816159	-0.33558	2.64e-06	9.09e-06
2040	STOM	-2.1136	-2.62246	-1.60473	3.93e-16	4.21e-15
2041	EPHA1	0.732236	0.561828	0.902644	3.71e-17	4.35e-16
2042	EPHA3	-0.180709	-0.446466	0.0850469	0.182617	0.247149
2043	EPHA4	0.254004	0.0813015	0.426707	0.00394364	0.0078899
2044	EPHA5	-0.206105	-0.47693	0.0647201	0.135808	0.190874
2045	EPHA7	0.105506	-0.279933	0.490945	0.591613	0.665494
2046	EPHA8	0.612676	0.416189	0.809163	9.87e-10	5.4e-09
2047	EPHB1	0.623503	0.294295	0.952712	0.000205575	0.000523497
2048	EPHB2	1.55203	1.17806	1.926	4.15e-16	4.44e-15
2049	EPHB3	1.39897	0.968557	1.82938	1.88e-10	1.12e-09
2050	EPHB4	0.578109	0.31335	0.842868	1.87e-05	5.66e-05
2051	EPHB6	-0.828055	-1.57404	-0.0820668	0.0295866	0.0490773
2052	EPHX1	-0.162545	-0.33188	0.00678962	0.0599206	0.0923536
2053	EPHX2	-0.596898	-0.978743	-0.215052	0.00218547	0.00459222
2054	STX2	-1.56083	-1.74255	-1.3791	1.37e-63	3.46e-61
2055	CLN8	-0.938868	-1.19105	-0.686688	2.94e-13	2.35e-12
2056	EPO	0.569475	0.286092	0.852859	8.19e-05	0.000222971
2057	EPOR	-0.289975	-0.858618	0.278667	0.317567	0.3974
2058	EPRS	1.63121	0.916004	2.34642	7.82e-06	2.51e-05
2059	EPS8	0.28022	-0.163743	0.724183	0.216054	0.285761
2060	EPS15	-1.45034	-1.79426	-1.10643	1.39e-16	1.55e-15
2063	NR2F6	1.39168	0.922314	1.86104	6.2e-09	3.07e-08
2064	ERBB2	1.13459	0.826763	1.44241	5.05e-13	3.94e-12
2065	ERBB3	1.00215	0.735477	1.26882	1.76e-13	1.44e-12
2066	ERBB4	-1.04966	-1.74477	-0.354548	0.00307975	0.00629073
2067	ERCC1	0.320745	-0.0302066	0.671696	0.0732502	0.110653
2068	ERCC2	0.762504	0.188331	1.33668	0.0092455	0.0171275
2069	EREG	-0.022214	-0.188779	0.144351	0.793792	0.837528
2070	EYA4	-1.02876	-1.61416	-0.44336	0.000572398	0.00134337
2071	ERCC3	0.593806	0.233375	0.954237	0.00124215	0.00274575
2072	ERCC4	0.297304	-0.00783427	0.602441	0.0561792	0.0872079
2073	ERCC5	-0.923395	-2.06013	0.213339	0.111357	0.160215
2074	ERCC6	0.631031	0.401961	0.8601	6.69e-08	2.86e-07
2077	ERF	-0.178296	-0.379274	0.0226817	0.0820755	0.122143
2078	ERG	-2.54463	-3.04987	-2.03939	5.55e-23	1.08e-21
2079	ERH	1.10434	0.832823	1.37586	1.56e-15	1.58e-14
2081	ERN1	0.164597	-0.143063	0.472256	0.294374	0.372701
2091	FBL	0.776209	0.475929	1.07649	4.05e-07	1.57e-06
2098	ESD	-1.14784	-1.4443	-0.85139	3.23e-14	2.84e-13
2099	ESR1	0.0968468	-0.0694474	0.263141	0.253684	0.328381
2100	ESR2	0.551892	0.367205	0.736578	4.72e-09	2.37e-08
2101	ESRRA	0.60317	0.434484	0.771857	2.41e-12	1.76e-11
2103	ESRRB	0.152166	-0.120753	0.425085	0.274492	0.351125
2104	ESRRG	-0.156613	-0.35631	0.0430845	0.124268	0.176544
2107	ETF1	-1.75496	-2.20325	-1.30667	1.68e-14	1.52e-13
2108	ETFA	0.131955	-0.380077	0.643986	0.61349	0.685
2109	ETFB	0.133639	-0.0330086	0.300287	0.116009	0.166061
2110	ETFDH	-0.190685	-0.549242	0.167872	0.297258	0.375857
2113	ETS1	-1.07886	-1.64132	-0.516403	0.000170294	0.000440012
2114	ETS2	-1.45071	-1.75321	-1.14821	5.48e-21	8.93e-20
2115	ETV1	-1.11557	-1.40379	-0.827342	3.3e-14	2.9e-13
2116	ETV2	0.116452	-0.050183	0.283088	0.170777	0.23332
2117	ETV3	-0.314377	-0.930459	0.301706	0.317244	0.397161
2118	ETV4	2.18485	1.50672	2.86299	2.71e-10	1.58e-09
2119	ETV5	-0.956099	-1.2349	-0.677301	1.8e-11	1.19e-10
2120	ETV6	0.762366	0.371304	1.15343	0.000132963	0.00035019
2121	EVC	-0.531161	-0.826962	-0.235361	0.000432434	0.00103911
2122	MECOM	-0.730147	-0.900499	-0.559796	4.44e-17	5.17e-16
2123	EVI2A	-0.786411	-0.995679	-0.577142	1.77e-13	1.44e-12
2124	EVI2B	-1.28524	-1.6552	-0.915274	9.84e-12	6.72e-11
2125	EVPL	0.593671	0.266395	0.920946	0.0003775	0.000917535
2128	EVX1	0.0572564	-0.273443	0.387956	0.734352	0.78938
2130	EWSR1	-0.133171	-0.451452	0.185111	0.412182	0.494914
2131	EXT1	-0.101678	-0.548094	0.344739	0.655301	0.721247
2132	EXT2	-0.0520454	-0.218534	0.114443	0.540076	0.618445
2134	EXTL1	0.401419	0.159166	0.643671	0.00116337	0.00258375
2135	EXTL2	-0.494445	-0.662131	-0.32676	7.5e-09	3.67e-08
2137	EXTL3	0.394565	0.060944	0.728186	0.0204494	0.0350938
2138	EYA1	-0.0699941	-0.241729	0.101741	0.424394	0.507128
2139	EYA2	0.435388	0.136359	0.734416	0.00432099	0.0085928
2140	EYA3	0.239107	-0.0244032	0.502618	0.0753291	0.113388
2145	EZH1	-1.33747	-1.62066	-1.05428	2.11e-20	3.27e-19
2146	EZH2	2.04634	1.43135	2.66133	6.95e-11	4.31e-10
2147	F2	0.454561	0.215873	0.693249	0.000189523	0.000486073
2149	F2R	-0.193146	-0.523104	0.136811	0.251258	0.32564
2150	F2RL1	0.935995	0.55538	1.31661	1.44e-06	5.16e-06
2151	F2RL2	0.468271	0.300725	0.635816	4.3e-08	1.89e-07
2152	F3	-0.541856	-0.786084	-0.297628	1.37e-05	4.24e-05
2153	F5	0.65938	0.490014	0.828746	2.34e-14	2.09e-13
2155	F7	0.680648	0.261676	1.09962	0.0014521	0.00316874
2157	F8	-1.7078	-2.09013	-1.32548	2.04e-18	2.66e-17
2158	F9	0.13535	-0.127541	0.398241	0.31293	0.392435
2159	F10	-1.20914	-1.58536	-0.832921	2.99e-10	1.73e-09
2160	F11	-1.22729	-2.08993	-0.364663	0.00529517	0.0103395
2161	F12	1.84266	1.34808	2.33724	2.83e-13	2.26e-12
2162	F13A1	-0.603269	-0.821667	-0.38487	6.17e-08	2.65e-07
2165	F13B	0.159768	-0.0121378	0.331673	0.0685194	0.104214
2166	FAAH	0.157744	-0.0672781	0.382765	0.169453	0.231691
2167	FABP4	-3.78511	-4.7586	-2.81161	2.52e-14	2.25e-13
2168	FABP1	0.153058	-0.0576077	0.363724	0.154446	0.213785
2169	FABP2	0.120883	-0.111881	0.353646	0.308734	0.387862
2170	FABP3	-0.257	-0.601551	0.0875523	0.143761	0.200677
2171	FABP5	-1.54317	-2.19552	-0.89082	3.55e-06	1.2e-05
2172	FABP6	-0.307527	-0.756939	0.141886	0.179863	0.243921
2173	FABP7	0.682651	0.211142	1.15416	0.00454487	0.00899991
2175	FANCA	1.36606	0.713457	2.01867	4.08e-05	0.000116973
2176	FANCC	0.114061	-0.141964	0.370085	0.382566	0.46554
2177	FANCD2	1.58072	0.993044	2.1684	1.35e-07	5.57e-07
2178	FANCE	0.545639	0.360717	0.730561	7.33e-09	3.6e-08
2180	ACSL1	-1.07692	-1.30118	-0.852667	4.86e-21	8e-20
2181	ACSL3	-0.217396	-0.531415	0.096623	0.174817	0.238175
2182	ACSL4	-1.17575	-1.45607	-0.895424	2.03e-16	2.22e-15
2184	FAH	0.250616	-0.155403	0.656635	0.226358	0.297713
2185	PTK2B	-0.771813	-1.00866	-0.534964	1.69e-10	1.01e-09
2186	BPTF	0.0224194	-0.153787	0.198626	0.803072	0.845852
2187	FANCB	0.94928	0.555967	1.34259	2.24e-06	7.8e-06
2188	FANCF	1.50706	1.07701	1.9371	6.49e-12	4.52e-11
2189	FANCG	1.32824	0.874782	1.7817	9.41e-09	4.53e-08
2191	FAP	1.68036	1.26134	2.09937	3.84e-15	3.72e-14
2192	FBLN1	-1.62156	-1.88913	-1.35398	1.54e-32	5.97e-31
2193	FARSA	0.822912	0.515177	1.13065	1.6e-07	6.51e-07
2194	FASN	0.0680581	-0.252642	0.388759	0.677455	0.740006
2195	FAT1	0.692584	-0.438547	1.82371	0.230111	0.301729
2196	FAT2	0.402454	0.23436	0.570547	2.7e-06	9.29e-06
2197	FAU	0.200946	-0.164487	0.56638	0.281144	0.358311
2199	FBLN2	-0.144548	-0.357496	0.0683998	0.183382	0.248085
2200	FBN1	0.0735975	-0.159292	0.306487	0.535662	0.61449
2201	FBN2	0.170286	0.00364677	0.336926	0.0451927	0.071739
2202	EFEMP1	-1.99741	-2.32795	-1.66688	2.31e-32	8.87e-31
2203	FBP1	-1.52338	-1.89734	-1.14942	1.41e-15	1.43e-14
2204	FCAR	-0.449622	-0.792187	-0.107057	0.0100972	0.0185638
2205	FCER1A	-1.27607	-1.85624	-0.695897	1.63e-05	4.97e-05
2206	MS4A2	-1.44996	-1.93904	-0.960888	6.22e-09	3.08e-08
2207	FCER1G	-1.32404	-1.50093	-1.14716	9.85e-49	1.04e-46
2208	FCER2	0.294569	0.0723832	0.516756	0.00936387	0.0173195
2212	FCGR2A	-0.659393	-1.14111	-0.17768	0.00729872	0.0138301
2213	FCGR2B	-0.0476882	-0.25379	0.158413	0.650189	0.717002
2214	FCGR3A	-1.28113	-1.51454	-1.04772	5.45e-27	1.43e-25
2215	FCGR3B	-1.4071	-1.8592	-0.954996	1.06e-09	5.77e-09
2217	FCGRT	-1.04797	-1.69036	-0.405571	0.00138686	0.0030383
2218	FKTN	0.218465	-0.0752477	0.512178	0.144887	0.201995
2219	FCN1	-1.7888	-2.49826	-1.07935	7.74e-07	2.88e-06
2220	FCN2	0.0419862	-0.136596	0.220568	0.644938	0.712773
2222	FDFT1	-0.54383	-0.71214	-0.37552	2.41e-10	1.41e-09
2224	FDPS	0.0321687	-0.340508	0.404846	0.865655	0.896007
2229	FDPSP5	0.07267	-0.175709	0.321049	0.566346	0.642507
2230	FDX1	-0.385044	-1.04021	0.27012	0.249369	0.323431
2232	FDXR	0.315298	0.113543	0.517052	0.00219137	0.00460285
2235	FECH	0.0675817	-0.211206	0.34637	0.634701	0.703704
2237	FEN1	1.70614	0.773524	2.63875	0.000336318	0.000825603
2239	GPC4	0.290223	-0.0434317	0.623877	0.088225	0.130167
2241	FER	-0.532804	-0.963026	-0.102582	0.0152119	0.0268734
2242	FES	-0.926926	-1.36831	-0.485546	3.85e-05	0.000110905
2243	FGA	0.509428	0.25829	0.760566	7.02e-05	0.000193076
2244	FGB	0.811249	0.640359	0.982139	1.35e-20	2.12e-19
2245	FGD1	0.800442	0.558263	1.04262	9.29e-11	5.7e-10
2246	FGF1	-0.25168	-0.418694	-0.0846671	0.00314127	0.00640896
2247	FGF2	-1.65268	-2.34825	-0.957103	3.21e-06	1.09e-05
2248	FGF3	0.272167	0.0999722	0.444362	0.00194916	0.00413686
2249	FGF4	0.561238	0.2368	0.885677	0.000697655	0.00161052
2250	FGF5	0.49534	0.299115	0.691565	7.51e-07	2.8e-06
2251	FGF6	0.566717	0.19584	0.937594	0.00274525	0.00566218
2252	FGF7	-1.03641	-1.22413	-0.848681	2.74e-27	7.4e-26
2253	FGF8	0.32145	0.148873	0.494027	0.00026151	0.000653498
2254	FGF9	-0.325587	-0.492508	-0.158667	0.000131833	0.000347472
2255	FGF10	-1.91927	-3.03293	-0.805617	0.000730694	0.00168037
2256	FGF11	1.77743	1.33474	2.22013	3.56e-15	3.46e-14
2257	FGF12	0.0914733	-0.238439	0.421385	0.586833	0.661525
2258	FGF13	0.139461	-0.13486	0.413781	0.319047	0.398899
2259	FGF14	-1.37873	-2.01956	-0.737906	2.48e-05	7.34e-05
2260	FGFR1	-0.6927	-0.861975	-0.523426	1.05e-15	1.08e-14
2261	FGFR3	-0.350655	-0.817627	0.116317	0.141085	0.197515
2262	GPC5	-0.650124	-1.06922	-0.231024	0.00236286	0.00493512
2263	FGFR2	-1.33381	-1.74744	-0.920187	2.61e-10	1.52e-09
2264	FGFR4	-2.33975	-2.77912	-1.90037	1.68e-25	3.97e-24
2266	FGG	-0.0228109	-0.254601	0.208979	0.847049	0.88124
2267	FGL1	0.923512	0.696559	1.15046	1.52e-15	1.53e-14
2268	FGR	-2.67169	-3.5958	-1.74759	1.46e-08	6.84e-08
2271	FH	1.17396	0.99882	1.34911	2.01e-39	1.19e-37
2272	FHIT	0.444154	-0.094698	0.983006	0.106198	0.153661
2273	FHL1	-2.89105	-3.69436	-2.08773	1.74e-12	1.29e-11
2274	FHL2	1.45849	1.24769	1.6693	6.89e-42	4.77e-40
2275	FHL3	0.906408	0.551453	1.26136	5.59e-07	2.12e-06
2277	VEGFD	-2.29293	-2.57785	-2.008	4.8e-56	7.69e-54
2280	FKBP1A	-0.485678	-0.758451	-0.212904	0.000483476	0.00114935
2281	FKBP1B	-1.2739	-1.6651	-0.88271	1.74e-10	1.04e-09
2286	FKBP2	1.14405	0.836366	1.45173	3.15e-13	2.5e-12
2287	FKBP3	1.44745	1.2496	1.6453	1.25e-46	1.21e-44
2288	FKBP4	1.15372	0.978605	1.32883	3.79e-38	2.11e-36
2289	FKBP5	-0.122722	-0.289198	0.0437543	0.148505	0.206481
2290	FOXG1	0.166896	-0.266112	0.599904	0.449988	0.532802
2294	FOXF1	-2.88662	-3.60934	-2.16389	4.95e-15	4.74e-14
2295	FOXF2	-1.68135	-1.94054	-1.42215	4.96e-37	2.62e-35
2296	FOXC1	-0.00781622	-0.249751	0.234118	0.949511	0.96138
2297	FOXD1	0.250095	-0.0876571	0.587847	0.146698	0.204251
2299	FOXI1	0.455965	0.0676471	0.844283	0.021369	0.0365312
2300	FOXL1	0.430702	0.0964245	0.76498	0.011559	0.0209723
2301	FOXE3	0.272693	-0.10342	0.648806	0.155307	0.214879
2302	FOXJ1	0.0848942	-0.095895	0.265683	0.357389	0.439635
2303	FOXC2	0.241896	-0.255398	0.739189	0.340401	0.421558
2304	FOXE1	0.705931	0.531085	0.880776	2.51e-15	2.48e-14
2305	FOXM1	1.73651	0.791931	2.68109	0.000314342	0.000775723
2306	FOXD2	0.611621	0.185848	1.03739	0.00487045	0.00959611
2307	FOXS1	-0.0263458	-0.267901	0.215209	0.830728	0.86833
2308	FOXO1	-1.36529	-1.54315	-1.18742	3.74e-51	4.52e-49
2309	FOXO3	-1.21247	-1.39249	-1.03244	8.73e-40	5.27e-38
2312	FLG	-0.070322	-0.345929	0.205285	0.617011	0.68774
2313	FLI1	-1.99842	-2.3992	-1.59764	1.47e-22	2.78e-21
2314	FLII	-0.178349	-0.34501	-0.0116878	0.0359569	0.0584248
2315	MLANA	-0.0389456	-0.351098	0.273207	0.806817	0.848814
2316	FLNA	-0.793438	-0.963984	-0.622891	7.62e-20	1.12e-18
2317	FLNB	0.380641	0.10579	0.655491	0.00664053	0.012699
2318	FLNC	-0.257835	-0.638695	0.123025	0.184556	0.249383
2319	FLOT2	0.037168	-0.185413	0.259749	0.743451	0.796902
2321	FLT1	-0.304081	-0.726017	0.117855	0.157801	0.217915
2322	FLT3	-0.129563	-0.424765	0.165638	0.389665	0.472471
2323	FLT3LG	-0.421953	-0.815103	-0.0288029	0.0354173	0.0576189
2324	FLT4	-0.890305	-1.49415	-0.286465	0.00385507	0.00772952
2326	FMO1	0.338155	-0.407066	1.08338	0.373809	0.45663
2327	FMO2	-2.47488	-2.68126	-2.26851	3.66e-122	1.55e-118
2328	FMO3	-1.47831	-1.87397	-1.08264	2.43e-13	1.95e-12
2329	FMO4	-0.2395	-0.694116	0.215116	0.301817	0.380688
2330	FMO5	0.0698261	-0.210428	0.35008	0.625315	0.695156
2331	FMOD	-0.262485	-0.699806	0.174835	0.239436	0.312214
2332	FMR1	-0.0844384	-0.334651	0.165774	0.508341	0.589191
2334	AFF2	-0.258134	-0.653406	0.137138	0.200558	0.268219
2335	FN1	-0.218938	-0.534724	0.0968481	0.174189	0.237418
2339	FNTA	-0.0406336	-0.386238	0.304971	0.817751	0.857586
2342	FNTB	1.09919	0.143985	2.05439	0.0241079	0.0407438
2346	FOLH1	0.47262	0.2798	0.66544	1.55e-06	5.56e-06
2348	FOLR1	-0.925608	-1.21458	-0.636639	3.43e-10	1.97e-09
2350	FOLR2	-0.489387	-0.683288	-0.295487	7.55e-07	2.82e-06
2352	FOLR3	-0.938493	-1.63757	-0.239416	0.00850832	0.0158661
2353	FOS	-1.19877	-1.44133	-0.956218	3.44e-22	6.27e-21
2354	FOSB	-1.57147	-1.91848	-1.22445	6.94e-19	9.43e-18
2355	FOSL2	-0.293837	-0.500248	-0.0874265	0.00526888	0.0102947
2356	FPGS	0.319881	0.0268467	0.612916	0.0323929	0.0532063
2357	FPR1	-1.41989	-1.97913	-0.860643	6.48e-07	2.44e-06
2358	FPR2	-1.1997	-1.80783	-0.591574	0.000110373	0.000294227
2359	FPR3	-0.341659	-0.532064	-0.151253	0.000436598	0.00104792
2395	FXN	0.0860829	-0.0804132	0.252579	0.310891	0.39023
2444	FRK	0.944632	0.501199	1.38806	2.98e-05	8.7e-05
2475	MTOR	0.489493	0.212583	0.766402	0.000530962	0.00125196
2487	FRZB	-0.0532115	-0.307603	0.20118	0.681829	0.743785
2488	FSHB	0.381065	0.100306	0.661823	0.00780943	0.0146898
2491	CENPI	1.42254	0.892804	1.95228	1.42e-07	5.82e-07
2492	FSHR	0.0940593	-0.338385	0.526504	0.669886	0.733425
2494	NR5A2	-0.979566	-1.29366	-0.665473	9.8e-10	5.36e-09
2495	FTH1	-0.951892	-1.33406	-0.569719	1.05e-06	3.85e-06
2509	FTH1P5	-0.446481	-0.752221	-0.140741	0.00420725	0.00837921
2512	FTL	-0.435389	-0.718327	-0.15245	0.0025612	0.00531419
2515	ADAM2	0.230913	0.017323	0.444502	0.0340968	0.0557064
2516	NR5A1	0.33588	0.0967951	0.574965	0.00589676	0.0113994
2517	FUCA1	0.358707	0.0549531	0.662461	0.0206377	0.0353825
2519	FUCA2	0.50369	0.184561	0.822819	0.00197836	0.00419294
2520	GAST	0.391433	0.218759	0.564108	8.87e-06	2.82e-05
2521	FUS	0.708441	0.497574	0.919308	4.55e-11	2.89e-10
2523	FUT1	-1.00868	-1.18208	-0.835289	4.1e-30	1.34e-28
2524	FUT2	2.04807	1.08578	3.01036	3.03e-05	8.85e-05
2525	FUT3	1.64563	1.11009	2.18117	1.72e-09	9.14e-09
2526	FUT4	0.35222	0.165417	0.539023	0.000219422	0.000555407
2527	FUT5	0.277148	-0.0456218	0.599918	0.092388	0.13575
2528	FUT6	1.16049	0.873061	1.44792	2.51e-15	2.48e-14
2529	FUT7	0.45	0.254783	0.645217	6.24e-06	2.03e-05
2530	FUT8	1.40459	0.943819	1.86535	2.31e-09	1.21e-08
2531	KDSR	-0.911013	-1.23765	-0.584372	4.59e-08	2.01e-07
2532	ACKR1	-1.82476	-2.29948	-1.35004	4.92e-14	4.27e-13
2533	FYB	-0.237785	-0.404499	-0.0710708	0.00518188	0.0101407
2534	FYN	-1.47376	-1.81045	-1.13706	9.57e-18	1.18e-16
2535	FZD2	0.130011	-0.209323	0.469345	0.452693	0.535496
2537	IFI6	0.496252	-0.0380748	1.03058	0.0687131	0.104478
2538	G6PC	0.0637343	-0.124856	0.252324	0.507732	0.58855
2539	G6PD	0.615916	0.430302	0.80153	7.84e-11	4.85e-10
2542	SLC37A4	1.37234	1.11663	1.62805	7.09e-26	1.72e-24
2543	GAGE1	0.269175	-0.0285787	0.566929	0.0764203	0.11481
2548	GAA	-0.391056	-0.558342	-0.223769	4.61e-06	1.53e-05
2549	GAB1	-1.4688	-2.179	-0.758599	5.05e-05	0.000142136
2550	GABBR1	-0.299689	-0.593509	-0.00586781	0.0455969	0.0723317
2551	GABPA	-0.194816	-0.609444	0.219813	0.357102	0.439307
2553	GABPB1	0.523629	0.355825	0.691433	9.59e-10	5.26e-09
2554	GABRA1	0.00233233	-0.204586	0.209251	0.982374	0.986949
2555	GABRA2	0.0276379	-0.354739	0.410015	0.887345	0.912598
2556	GABRA3	0.368771	0.130543	0.606998	0.00241357	0.00503058
2557	GABRA4	0.034567	-0.750435	0.819569	0.931224	0.947675
2558	GABRA5	0.209129	-0.129727	0.547984	0.226427	0.297764
2559	GABRA6	0.196624	-0.0524023	0.44565	0.121735	0.173284
2560	GABRB1	0.218743	0.0518031	0.385683	0.010224	0.0187756
2561	GABRB2	-0.36682	-0.656077	-0.0775637	0.012936	0.0232038
2562	GABRB3	0.11788	-0.138205	0.373965	0.366949	0.449668
2563	GABRD	0.595547	0.217161	0.973932	0.00203678	0.00430509
2564	GABRE	0.147553	-0.0190793	0.314186	0.0826436	0.122876
2565	GABRG1	-0.0330465	-0.514669	0.448576	0.893021	0.917052
2566	GABRG2	0.363289	-0.0992761	0.825854	0.123727	0.175847
2567	GABRG3	-0.27617	-0.774768	0.222428	0.277651	0.354501
2568	GABRP	0.326738	0.103544	0.549933	0.0041148	0.00820669
2569	GABRR1	0.245851	0.0227211	0.468981	0.0308079	0.0508478
2570	GABRR2	0.494133	0.255533	0.732733	4.93e-05	0.000139075
2571	GAD1	1.10956	0.753956	1.46516	9.62e-10	5.27e-09
2572	GAD2	0.399683	-0.145518	0.944884	0.150765	0.209278
2580	GAK	0.216797	-0.0518761	0.485471	0.113757	0.163257
2581	GALC	-1.25639	-1.47127	-1.04151	2.1e-30	6.96e-29
2582	GALE	1.45801	1.27816	1.63785	7.46e-57	1.28e-54
2583	B4GALNT1	0.747493	0.552665	0.942321	5.49e-14	4.72e-13
2584	GALK1	0.270309	-0.370819	0.911437	0.408606	0.491513
2585	GALK2	-0.13666	-0.551371	0.27805	0.518363	0.598477
2587	GALR1	0.0531823	-0.15462	0.260985	0.615943	0.686853
2588	GALNS	0.21674	-0.237938	0.671419	0.350152	0.431881
2589	GALNT1	1.08592	0.716891	1.45495	8.05e-09	3.92e-08
2590	GALNT2	1.33798	0.829384	1.84658	2.52e-07	1e-06
2591	GALNT3	0.77395	0.438885	1.10901	5.98e-06	1.95e-05
2592	GALT	-0.313976	-0.701231	0.0732789	0.112041	0.1611
2593	GAMT	0.974931	0.694345	1.25552	9.75e-12	6.66e-11
2595	GANC	-1.04307	-1.84162	-0.24452	0.0104637	0.0191776
2596	GAP43	0.383675	0.155033	0.612316	0.00100564	0.00225909
2597	GAPDH	2.10721	1.78975	2.42467	1.08e-38	6.15e-37
2615	LRRC32	-2.21271	-2.69617	-1.72925	2.95e-19	4.13e-18
2617	GARS	1.61001	1.01383	2.20619	1.2e-07	5e-07
2618	GART	1.47912	1.19187	1.76638	5.98e-24	1.26e-22
2619	GAS1	-0.836545	-1.3457	-0.327391	0.00128083	0.00282504
2620	GAS2	0.071049	-0.228371	0.370469	0.641876	0.710206
2621	GAS6	-2.01529	-2.20642	-1.82415	7.06e-95	9.32e-92
2622	GAS8	-0.0904611	-0.373425	0.192503	0.530932	0.610223
2623	GATA1	0.0456985	-0.641417	0.732814	0.896287	0.919711
2624	GATA2	-2.10638	-2.45006	-1.76271	3.05e-33	1.24e-31
2625	GATA3	-0.633195	-0.989735	-0.276655	0.000499942	0.00118476
2626	GATA4	0.174919	-0.0651115	0.41495	0.153206	0.212264
2627	GATA6	-1.69559	-2.35411	-1.03707	4.5e-07	1.73e-06
2628	GATM	0.196149	0.0296785	0.362619	0.0209221	0.0358352
2629	GBA	1.11256	0.853841	1.37129	3.51e-17	4.13e-16
2630	GBAP1	1.15458	0.895308	1.41385	2.59e-18	3.35e-17
2631	GBAS	0.29114	0.118999	0.463281	0.000916864	0.00207044
2632	GBE1	-0.339325	-0.506385	-0.172265	6.86e-05	0.000189181
2633	GBP1	-0.361053	-0.680493	-0.0416141	0.0267399	0.0447628
2634	GBP2	-0.349171	-0.608543	-0.0897983	0.00832662	0.0155616
2635	GBP3	-0.409343	-0.679966	-0.138721	0.00303039	0.00619648
2636	GBX1	0.356007	0.18358	0.528435	5.19e-05	0.000145856
2637	GBX2	0.541759	0.373511	0.710006	2.77e-10	1.61e-09
2638	GC	0.182812	0.0163073	0.349317	0.0314037	0.0517745
2639	GCDH	0.68557	0.437706	0.933433	5.92e-08	2.55e-07
2641	GCG	0.158512	-0.0603895	0.377413	0.155824	0.215496
2642	GCGR	0.419733	0.189379	0.650087	0.00035523	0.000868199
2643	GCH1	-0.319986	-0.562127	-0.0778461	0.00959547	0.0177137
2644	GCHFR	-1.03558	-1.3734	-0.697754	1.88e-09	9.95e-09
2645	GCK	0.0737463	-0.265979	0.413471	0.6705	0.733772
2646	GCKR	0.730717	0.519006	0.942428	1.34e-11	8.98e-11
2647	BLOC1S1	-0.248247	-0.708624	0.21213	0.290574	0.368618
2648	KAT2A	1.51152	1.15117	1.87187	2.01e-16	2.21e-15
2649	NR6A1	0.552694	0.170146	0.935243	0.00463021	0.00915862
2650	GCNT1	0.666591	0.147325	1.18586	0.0118681	0.0214723
2651	GCNT2	-0.0921584	-0.440256	0.255939	0.603832	0.67622
2653	GCSH	0.943088	0.123585	1.76259	0.0240996	0.0407331
2657	GDF1	-0.314912	-1.43799	0.808165	0.58261	0.657676
2658	GDF2	-0.238359	-1.23116	0.754444	0.637954	0.706642
2660	MSTN	-0.153713	-0.395782	0.0883558	0.213289	0.282758
2661	GDF9	0.0853916	-0.338662	0.509446	0.693081	0.753454
2662	GDF10	-2.10496	-2.88905	-1.32088	1.43e-07	5.86e-07
2664	GDI1	-0.00926815	-0.31117	0.292634	0.952021	0.963321
2665	GDI2	0.612232	0.32572	0.898743	2.81e-05	8.25e-05
2668	GDNF	0.631809	0.452815	0.810803	4.57e-12	3.24e-11
2669	GEM	-0.016272	-0.266442	0.233898	0.898558	0.92144
2670	GFAP	0.521166	0.231374	0.810958	0.000423755	0.0010193
2671	GFER	0.84248	0.495892	1.18907	1.9e-06	6.68e-06
2672	GFI1	0.349594	0.182409	0.516778	4.16e-05	0.000119054
2673	GFPT1	1.96855	1.56637	2.37073	8.52e-22	1.51e-20
2674	GFRA1	-0.989631	-1.47697	-0.502291	6.89e-05	0.000189831
2675	GFRA2	-0.894987	-1.48053	-0.309442	0.00273779	0.00564789
2676	GFRA3	0.973043	0.676158	1.26993	1.33e-10	8.01e-10
2677	GGCX	1.4088	1.01312	1.80448	2.99e-12	2.15e-11
2681	GGTA1P	-1.59015	-1.80044	-1.37986	1.07e-49	1.18e-47
2683	B4GALT1	0.455111	0.139713	0.77051	0.00468143	0.00925299
2686	GGT7	0.502309	0.0638851	0.940733	0.0247321	0.0416955
2687	GGT5	0.868783	0.628294	1.10927	1.44e-12	1.07e-11
2688	GH1	0.227284	-0.160857	0.615424	0.251094	0.325467
2689	GH2	0.529807	0.132009	0.927605	0.00904419	0.0167869
2690	GHR	-1.97318	-2.8979	-1.04846	2.89e-05	8.46e-05
2691	GHRH	0.0608336	-0.105556	0.227223	0.473633	0.555818
2692	GHRHR	0.130197	-0.084612	0.345007	0.234854	0.307129
2693	GHSR	0.246652	-0.270267	0.763572	0.349679	0.431438
2694	GIF	0.117738	-0.0542557	0.289732	0.179696	0.243726
2695	GIP	0.382089	0.114204	0.649975	0.0051815	0.0101407
2696	GIPR	0.553798	0.380239	0.727358	4e-10	2.28e-09
2697	GJA1	-0.866722	-1.19602	-0.53743	2.49e-07	9.89e-07
2700	GJA3	0.527174	0.258711	0.795637	0.000118732	0.000314827
2701	GJA4	-1.93073	-2.1897	-1.67176	2.34e-48	2.44e-46
2702	GJA5	-0.955269	-1.29076	-0.619782	2.39e-08	1.09e-07
2703	GJA8	0.236215	0.0479236	0.424507	0.0139398	0.0248191
2705	GJB1	0.776014	0.352408	1.19962	0.000330042	0.000811233
2706	GJB2	2.1896	1.97253	2.40668	5.41e-87	4.76e-84
2707	GJB3	0.761959	0.193345	1.33057	0.00862916	0.0160773
2709	GJB5	0.443622	0.11026	0.776984	0.00910123	0.0168824
2710	GK	-0.172244	-0.832032	0.487545	0.608885	0.680792
2712	GK2	-0.0739126	-0.454824	0.306999	0.703713	0.762933
2717	GLA	0.0892459	-0.108591	0.287083	0.376612	0.459538
2719	GPC3	-2.36248	-2.94286	-1.78211	1.48e-15	1.5e-14
2720	GLB1	0.00407103	-0.162256	0.170398	0.961738	0.97097
2729	GCLC	0.889351	0.660411	1.11829	2.66e-14	2.37e-13
2730	GCLM	0.604188	0.435483	0.772892	2.23e-12	1.63e-11
2731	GLDC	0.685069	0.487309	0.882828	1.12e-11	7.63e-11
2733	GLE1	0.451709	0.263393	0.640025	2.58e-06	8.92e-06
2734	GLG1	0.45636	0.0502509	0.862469	0.0276311	0.0460757
2735	GLI1	0.149108	-0.0900405	0.388256	0.221697	0.292237
2736	GLI2	0.205842	-0.0296014	0.441285	0.0866123	0.128046
2737	GLI3	-0.358076	-0.908383	0.192231	0.202197	0.270085
2738	GLI4	0.837976	0.639412	1.03654	1.32e-16	1.48e-15
2739	GLO1	0.33612	0.156795	0.515445	0.000239085	0.00060094
2740	GLP1R	0.404786	-0.0659199	0.875492	0.0918958	0.135121
2741	GLRA1	0.0649866	-0.119841	0.249814	0.490737	0.572111
2742	GLRA2	0.256649	-0.113541	0.626838	0.174203	0.237418
2743	GLRB	0.287613	0.120744	0.454481	0.000729688	0.00167842
2744	GLS	-0.332504	-0.541519	-0.123488	0.00182126	0.00389315
2745	GLRX	-0.894214	-1.0655	-0.722932	1.42e-24	3.15e-23
2746	GLUD1	-0.797696	-1.23493	-0.360461	0.000349186	0.000854515
2747	GLUD2	-0.331141	-0.566108	-0.0961742	0.00574141	0.0111265
2752	GLUL	-0.730975	-0.960681	-0.501268	4.46e-10	2.53e-09
2760	GM2A	-0.171488	-0.487197	0.14422	0.287045	0.364908
2762	GMDS	1.53836	1.35723	1.7195	3.26e-62	7.66e-60
2764	GMFB	-0.130641	-0.620096	0.358813	0.600879	0.673694
2765	GML	0.142751	-0.0601942	0.345697	0.168008	0.229923
2766	GMPR	-0.616312	-1.02691	-0.205711	0.00326203	0.00662847
2767	GNA11	-1.36151	-1.68925	-1.03378	3.88e-16	4.16e-15
2768	GNA12	0.399553	0.193211	0.605896	0.000147528	0.000385572
2769	GNA15	0.0055741	-0.191026	0.202174	0.955685	0.96615
2770	GNAI1	-0.554487	-0.740232	-0.368743	4.89e-09	2.45e-08
2771	GNAI2	-1.32033	-1.75079	-0.889872	1.84e-09	9.74e-09
2773	GNAI3	0.324171	0.00820297	0.640139	0.0443416	0.0705308
2774	GNAL	-0.204961	-0.412779	0.0028576	0.0532345	0.083076
2775	GNAO1	0.374202	0.206701	0.541702	1.19e-05	3.73e-05
2776	GNAQ	-2.02179	-2.54254	-1.50103	2.75e-14	2.44e-13
2778	GNAS	0.964803	0.598305	1.3313	2.47e-07	9.86e-07
2779	GNAT1	0.235564	0.0689767	0.402152	0.00557986	0.0108413
2780	GNAT2	0.100967	-0.117809	0.319743	0.365709	0.448409
2781	GNAZ	-0.537499	-0.916991	-0.158007	0.00550282	0.0107103
2782	GNB1	-0.177329	-0.468225	0.113567	0.23217	0.304052
2783	GNB2	0.259079	0.0920762	0.426081	0.0023612	0.00493261
2784	GNB3	0.834507	0.50429	1.16472	7.3e-07	2.73e-06
2785	GNG3	0.274377	-0.0435073	0.592261	0.0907006	0.13354
2786	GNG4	0.802672	0.584845	1.0205	5.11e-13	3.99e-12
2787	GNG5	-0.158044	-0.324666	0.00857894	0.0630199	0.0966199
2788	GNG7	0.0643364	-0.47791	0.606583	0.816114	0.856252
2790	GNG10	-0.479699	-0.731769	-0.227628	0.000191576	0.000490864
2791	GNG11	-1.92894	-2.23833	-1.61955	2.44e-34	1.07e-32
2792	GNGT1	0.571528	0.0979297	1.04513	0.0180183	0.0313202
2793	GNGT2	-0.806667	-1.5129	-0.100433	0.0251762	0.0423732
2794	GNL1	-0.617063	-1.13945	-0.0946794	0.0206021	0.0353301
2796	GNRH1	-0.345181	-0.652163	-0.0381983	0.0275352	0.045934
2797	GNRH2	0.375692	0.19744	0.553944	3.61e-05	0.000104412
2798	GNRHR	0.201696	-0.0350255	0.438418	0.094926	0.138958
2799	GNS	-0.0927505	-0.25908	0.073579	0.274422	0.351056
2800	GOLGA1	-0.0516459	-0.575437	0.472145	0.846761	0.881017
2801	GOLGA2	0.718819	0.485598	0.952039	1.53e-09	8.21e-09
2802	GOLGA3	1.07113	0.515544	1.62671	0.000157663	0.000409431
2803	GOLGA4	-0.0948883	-0.464952	0.275176	0.615277	0.686363
2804	GOLGB1	0.116295	-0.176564	0.409155	0.436388	0.519318
2805	GOT1	1.08558	0.636515	1.53465	2.16e-06	7.54e-06
2806	GOT2	1.31088	0.993866	1.62789	5.29e-16	5.6e-15
2810	SFN	1.08558	0.71905	1.45212	6.44e-09	3.18e-08
2811	GP1BA	-0.0537817	-0.276197	0.168634	0.635547	0.704531
2813	GP2	0.417719	0.184379	0.651058	0.00045034	0.00107748
2814	GP5	-0.169889	-0.495243	0.155466	0.306107	0.385042
2815	GP9	-0.406455	-1.22506	0.412149	0.330471	0.411139
2817	GPC1	0.401241	0.0589047	0.743576	0.0216068	0.0369123
2819	GPD1	-1.97215	-2.75545	-1.18885	8.03e-07	2.98e-06
2820	GPD2	0.698849	0.529079	0.868619	7.14e-16	7.46e-15
2821	GPI	1.60075	1.25369	1.9478	1.57e-19	2.24e-18
2822	GPLD1	-0.297216	-0.700915	0.106484	0.149025	0.207108
2823	GPM6A	-3.63235	-4.63106	-2.63364	1.01e-12	7.69e-12
2824	GPM6B	-2.28849	-2.48551	-2.09146	1.01e-114	3.57e-111
2825	GPR1	-0.148026	-0.416994	0.120941	0.280736	0.357878
2826	CCR10	0.538249	0.151377	0.925121	0.00639389	0.0122662
2827	GPR3	0.148583	-0.150756	0.447921	0.330619	0.411299
2828	GPR4	-0.938866	-1.36718	-0.510557	1.74e-05	5.29e-05
2829	XCR1	-0.0550304	-0.34911	0.239049	0.713795	0.771727
2830	GPR6	0.0962766	-0.163037	0.35559	0.466806	0.549271
2831	NPBWR1	0.345037	0.091469	0.598606	0.00765372	0.01442
2832	NPBWR2	0.0949181	-0.0877236	0.27756	0.3084	0.387581
2833	CXCR3	0.461652	0.284208	0.639096	3.41e-07	1.33e-06
2834	PRLHR	0.147556	-0.046731	0.341844	0.136608	0.191806
2835	GPR12	0.254662	0.0878781	0.421445	0.00276552	0.00570064
2837	UTS2R	0.0634259	-0.673475	0.800327	0.866036	0.896132
2838	GPR15	0.28596	0.113682	0.458237	0.00114073	0.002538
2840	GPR17	-0.546721	-1.17372	0.0802783	0.0874475	0.129137
2841	GPR18	0.186419	-0.0795461	0.452384	0.169514	0.231747
2842	GPR19	0.563071	-0.0586794	1.18482	0.0759	0.114125
2843	GPR20	-0.837848	-1.2704	-0.405293	0.00014681	0.000383743
2844	GPR21	0.139052	-0.0908504	0.368955	0.235841	0.308286
2845	GPR22	0.105956	-0.277142	0.489054	0.587762	0.662361
2846	LPAR4	0.508526	0.197788	0.819264	0.00133892	0.00293998
2847	MCHR1	1.22554	0.799081	1.65199	1.78e-08	8.24e-08
2848	GPR25	0.321975	0.127851	0.516099	0.0011508	0.00255799
2849	GPR26	0.00707452	-0.18714	0.201289	0.943084	0.956603
2850	GPR27	0.233954	-0.231462	0.699371	0.324512	0.404702
2852	GPER1	-1.59526	-2.39122	-0.79929	8.56e-05	0.000232391
2853	GPR31	0.342283	0.169794	0.514773	0.000100533	0.000269784
2854	GPR32	0.120506	-0.0621845	0.303196	0.196071	0.262866
2857	GPR34	-0.613211	-0.802008	-0.424414	1.94e-10	1.15e-09
2859	GPR35	0.913628	0.707002	1.12025	4.46e-18	5.68e-17
2861	GPR37	0.904088	0.727266	1.08091	1.23e-23	2.51e-22
2862	MLNR	0.188382	0.00555595	0.371208	0.0434326	0.0692674
2863	GPR39	0.954912	0.576452	1.33337	7.6e-07	2.84e-06
2864	FFAR1	-0.0420585	-0.236102	0.151985	0.670969	0.734135
2867	FFAR2	-0.28606	-0.469174	-0.102946	0.00219971	0.00461843
2868	GRK4	-0.121339	-0.46322	0.220543	0.486666	0.568455
2869	GRK5	-3.34443	-3.99576	-2.69311	7.96e-24	1.66e-22
2870	GRK6	-0.208442	-0.534937	0.118053	0.210831	0.279953
2872	MKNK2	-0.784788	-1.08971	-0.479869	4.55e-07	1.75e-06
2873	GPS1	1.56698	1.22741	1.90655	1.5e-19	2.16e-18
2874	GPS2	-0.371629	-0.603231	-0.140028	0.00166105	0.00358146
2875	GPT	0.555035	0.301189	0.808882	1.82e-05	5.52e-05
2876	GPX1	0.129554	-0.095053	0.35416	0.258261	0.333489
2877	GPX2	0.946875	0.736381	1.15737	1.18e-18	1.57e-17
2878	GPX3	-2.6315	-3.43581	-1.8272	1.43e-10	8.6e-10
2879	GPX4	0.481698	0.313353	0.650043	2.04e-08	9.39e-08
2880	GPX5	-0.143	-0.325993	0.039993	0.125617	0.178245
2882	GPX7	0.48633	0.318202	0.654458	1.43e-08	6.73e-08
2885	GRB2	-0.152314	-0.519223	0.214595	0.415855	0.498446
2886	GRB7	1.30233	0.974071	1.63058	7.49e-15	7.02e-14
2887	GRB10	0.274469	0.0322065	0.516731	0.0263833	0.0442358
2888	GRB14	0.638371	0.469418	0.807325	1.31e-13	1.08e-12
2889	RAPGEF1	-0.872779	-1.5011	-0.244462	0.00647828	0.0124123
2890	GRIA1	-2.0638	-2.93172	-1.19588	3.15e-06	1.08e-05
2891	GRIA2	0.202133	0.0351648	0.3691	0.0176563	0.0307549
2892	GRIA3	0.173403	-0.323417	0.670223	0.493927	0.575301
2893	GRIA4	-0.0114116	-0.424359	0.401536	0.956806	0.967006
2894	GRID1	-0.631743	-1.15704	-0.10645	0.0184159	0.0319359
2895	GRID2	0.0668895	-0.403135	0.536914	0.780303	0.826642
2896	GRN	-0.886925	-1.40477	-0.369075	0.00078838	0.00180127
2897	GRIK1	0.145354	-0.135783	0.426492	0.310896	0.39023
2898	GRIK2	0.783301	0.608133	0.958469	1.88e-18	2.46e-17
2899	GRIK3	0.160317	-0.0117187	0.332352	0.0677818	0.103196
2900	GRIK4	-0.736444	-1.47838	0.00549346	0.0517206	0.0810125
2901	GRIK5	0.389565	0.216954	0.562175	9.71e-06	3.07e-05
2902	GRIN1	0.866649	0.575487	1.15781	5.42e-09	2.7e-08
2903	GRIN2A	0.263892	-0.0946604	0.622445	0.149156	0.20725
2904	GRIN2B	0.118241	-0.0536452	0.290128	0.177573	0.241187
2905	GRIN2C	0.527473	0.29386	0.761086	9.63e-06	3.05e-05
2906	GRIN2D	0.648248	-0.0418509	1.33835	0.0656065	0.100144
2907	GRINA	0.0855664	-0.0808565	0.251989	0.313591	0.393072
2908	NR3C1	-1.08858	-1.26279	-0.91436	1.75e-34	7.82e-33
2909	ARHGAP35	-0.111337	-0.522995	0.300321	0.596048	0.669462
2911	GRM1	0.164627	-0.159391	0.488644	0.319339	0.399192
2912	GRM2	0.54877	0.300183	0.797357	1.51e-05	4.65e-05
2913	GRM3	-0.222989	-0.771461	0.325484	0.425539	0.508123
2914	GRM4	0.632906	0.464178	0.801634	1.95e-13	1.59e-12
2915	GRM5	0.59988	0.305628	0.894131	6.45e-05	0.000178438
2916	GRM6	-0.270803	-0.498064	-0.0435423	0.019518	0.0336485
2917	GRM7	0.13586	-0.178431	0.45015	0.396861	0.479759
2918	GRM8	0.0596106	-0.153265	0.272487	0.583116	0.657966
2919	CXCL1	-0.374768	-0.58716	-0.162376	0.000543436	0.00128051
2920	CXCL2	-1.45634	-1.90719	-1.00548	2.43e-10	1.42e-09
2921	CXCL3	-1.24293	-1.58191	-0.903944	6.65e-13	5.14e-12
2922	GRP	-0.235411	-0.543506	0.0726847	0.134243	0.188837
2923	PDIA3	0.719471	0.372922	1.06602	4.72e-05	0.000133612
2925	GRPR	0.413429	0.0779024	0.748955	0.015734	0.0277055
2926	GRSF1	0.283355	-0.217081	0.783792	0.267101	0.343082
2928	GSC2	0.14364	-0.0870229	0.374303	0.222267	0.292862
2931	GSK3A	0.638951	0.464663	0.813238	6.7e-13	5.18e-12
2932	GSK3B	-0.169984	-0.602169	0.262201	0.440779	0.523541
2934	GSN	-0.899654	-1.22768	-0.571627	7.64e-08	3.24e-07
2935	GSPT1	0.352037	-0.244903	0.948977	0.247738	0.321532
2936	GSR	0.775096	0.575642	0.97455	2.6e-14	2.32e-13
2937	GSS	1.03854	0.550308	1.52677	3.06e-05	8.93e-05
2938	GSTA1	0.082157	-0.283981	0.448295	0.660088	0.725355
2939	GSTA2	0.386607	-0.590213	1.36343	0.437916	0.520814
2940	GSTA3	-0.658618	-1.67641	0.359178	0.204692	0.272815
2941	GSTA4	-1.11547	-1.39584	-0.8351	6.3e-15	5.96e-14
2944	GSTM1	-0.280936	-0.918772	0.356901	0.38799	0.470866
2946	GSTM2	-0.412376	-0.664031	-0.160721	0.00131948	0.00290242
2947	GSTM3	-0.439717	-0.759503	-0.11993	0.00703857	0.0133887
2948	GSTM4	-0.351222	-0.583987	-0.118457	0.00310233	0.0063344
2949	GSTM5	-1.96448	-2.44504	-1.48393	1.13e-15	1.16e-14
2950	GSTP1	0.663845	0.423738	0.903952	6e-08	2.58e-07
2952	GSTT1	-0.355463	-0.606384	-0.104542	0.00549388	0.0106978
2953	GSTT2	-0.0788852	-0.328943	0.171173	0.536375	0.61514
2954	GSTZ1	0.264289	-0.472919	1.0015	0.482276	0.564301
2956	MSH6	0.861766	0.376342	1.34719	0.000502354	0.00119008
2957	GTF2A1	0.369779	0.0590425	0.680516	0.0196811	0.0339128
2958	GTF2A2	-0.18209	-0.508973	0.144793	0.274922	0.35157
2959	GTF2B	-0.574036	-0.980772	-0.167301	0.00567225	0.0110056
2960	GTF2E1	0.721394	0.486846	0.955942	1.66e-09	8.85e-09
2961	GTF2E2	0.897477	0.534494	1.26046	1.26e-06	4.56e-06
2962	GTF2F1	0.0180088	-0.193329	0.229347	0.867359	0.897017
2963	GTF2F2	0.205944	-0.270173	0.682061	0.396561	0.479534
2965	GTF2H1	-0.32031	-0.522544	-0.118075	0.0019073	0.00405738
2966	GTF2H2	0.0137417	-0.442636	0.470119	0.95294	0.963928
2967	GTF2H3	0.425627	0.257879	0.593374	6.59e-07	2.48e-06
2968	GTF2H4	0.811089	0.382625	1.23955	0.00020706	0.000527023
2969	GTF2I	0.42339	0.0933922	0.753388	0.011915	0.0215498
2970	GTF2IP1	0.278598	0.0281208	0.529075	0.0292569	0.0485876
2971	GTF3A	0.708134	0.441793	0.974475	1.88e-07	7.6e-07
2972	BRF1	0.493046	0.325187	0.660905	8.57e-09	4.15e-08
2974	GUCY1B2	1.39878	0.992066	1.80549	1.58e-11	1.05e-10
[truncated: 19,142 more rows]

## Sheet: S2_SQ_SMD
EntrezID	Symbol	SMD	SMD.lower	SMD.upper	pv	p.SQj
1	A1BG	0.30965	0.114225	0.505075	0.00189921	0.00410133
2	A2M	-2.71732	-3.53118	-1.90346	5.99138e-11	4.83816e-10
9	NAT1	-0.718514	-0.895082	-0.541946	1.51461e-15	2.16877e-14
10	NAT2	-0.656325	-0.835357	-0.477293	6.71319e-13	7.08442e-12
12	SERPINA3	-0.272698	-0.44576	-0.0996352	0.00201271	0.00431918
13	AADAC	-0.235917	-0.435824	-0.0360087	0.0207224	0.0356655
14	AAMP	0.876379	0.50868	1.24408	2.99153e-06	1.12609e-05
15	AANAT	-0.0172349	-0.304748	0.270278	0.906472	0.928468
16	AARS	1.09784	0.45381	1.74188	0.000834697	0.00192957
18	ABAT	-0.597541	-1.0536	-0.141479	0.0102292	0.0188923
19	ABCA1	-0.0949431	-0.45257	0.262683	0.602831	0.669468
20	ABCA2	-0.0652498	-0.342884	0.212385	0.645063	0.707982
21	ABCA3	-3.1395	-4.20925	-2.06975	8.81394e-09	5.05486e-08
22	ABCB7	0.501181	0.159163	0.843198	0.00407797	0.00817685
23	ABCF1	1.06376	0.749349	1.37817	3.32936e-11	2.8162e-10
24	ABCA4	0.544509	0.314754	0.774264	3.40025e-06	1.26731e-05
25	ABL1	-0.564387	-0.739661	-0.389113	2.76998e-10	2.02417e-09
26	AOC1	0.370513	0.154622	0.586403	0.000769046	0.00179161
27	ABL2	0.107192	-0.286271	0.500655	0.59337	0.660512
28	ABO	0.141526	-0.288856	0.571908	0.519244	0.592078
29	ABR	-1.67606	-1.89066	-1.46145	6.81959e-53	1.47924e-50
30	ACAA1	-1.75558	-2.27854	-1.23262	4.71612e-11	3.87695e-10
31	ACACA	0.498187	0.0940699	0.902305	0.0156834	0.0277492
32	ACACB	-2.63951	-3.58811	-1.69091	4.93453e-08	2.49724e-07
33	ACADL	-2.66397	-3.7031	-1.62483	5.04408e-07	2.16381e-06
34	ACADM	-0.849816	-1.1737	-0.52593	2.71008e-07	1.21491e-06
35	ACADS	-1.08881	-1.46547	-0.712154	1.46408e-08	8.13798e-08
36	ACADSB	-0.976606	-1.86031	-0.0929024	0.0303103	0.0500858
37	ACADVL	-0.952163	-1.41348	-0.490843	5.22434e-05	0.000154543
38	ACAT1	-1.91334	-2.63633	-1.19035	2.13845e-07	9.74401e-07
39	ACAT2	1.14489	0.780915	1.50887	7.04414e-10	4.81987e-09
40	ASIC2	0.00206807	-0.259773	0.263909	0.987649	0.990588
41	ASIC1	0.962617	0.310609	1.61463	0.0038077	0.00768272
43	ACHE	-0.217879	-0.478382	0.0426238	0.101157	0.145498
47	ACLY	1.12681	0.712703	1.54092	9.65084e-08	4.6622e-07
48	ACO1	-1.09388	-1.56342	-0.624338	4.96902e-06	1.79966e-05
49	ACR	-0.0141704	-1.47604	1.4477	0.984842	0.988372
50	ACO2	0.885515	0.0990417	1.67199	0.0273291	0.0456763
51	ACOX1	-0.199823	-0.445523	0.0458771	0.110936	0.157643
52	ACP1	1.65772	0.882251	2.43319	2.79183e-05	8.69786e-05
53	ACP2	-0.435388	-1.11681	0.246034	0.21046	0.275796
54	ACP5	-1.76896	-2.60148	-0.936431	3.11977e-05	9.63324e-05
55	ACPP	0.536718	0.249755	0.82368	0.000246563	0.000633705
56	ACRV1	0.335369	-0.133922	0.80466	0.16132	0.218998
58	ACTA1	-0.0388894	-0.225057	0.147278	0.682227	0.740389
59	ACTA2	-0.776033	-0.994786	-0.55728	3.57516e-12	3.44587e-11
60	ACTB	0.311091	-0.0937911	0.715972	0.132083	0.184147
69	ACTBP9	0.169187	-0.331446	0.669821	0.507738	0.581136
70	ACTC1	-0.441184	-0.754924	-0.127445	0.00584903	0.0113812
71	ACTG1	0.670907	0.0965475	1.24527	0.0220546	0.0376978
72	ACTG2	-1.0515	-1.47858	-0.624414	1.39651e-06	5.57485e-06
81	ACTN4	0.178561	-0.0883039	0.445426	0.189714	0.251956
86	ACTL6A	3.23513	2.36092	4.10934	4.07337e-13	4.40906e-12
87	ACTN1	0.624998	0.339168	0.910828	1.82185e-05	5.90956e-05
88	ACTN2	-1.20161	-2.02551	-0.377706	0.00425674	0.00850262
89	ACTN3	-0.015657	-0.726229	0.694915	0.965553	0.973417
90	ACVR1	0.571606	0.0608279	1.08238	0.0282805	0.0471083
91	ACVR1B	0.507221	0.150597	0.863846	0.00530957	0.0104241
92	ACVR2A	0.362157	0.155608	0.568705	0.000589167	0.00140329
93	ACVR2B	0.425559	-0.0237492	0.874866	0.0634015	0.0964449
94	ACVRL1	-2.98837	-4.14041	-1.83633	3.69352e-07	1.6242e-06
95	ACY1	0.262049	0.0172049	0.506894	0.0359327	0.0583769
97	ACYP1	1.01621	0.504059	1.52836	0.00010067	0.000281597
98	ACYP2	-0.592857	-1.2595	0.0737862	0.0813286	0.120193
100	ADA	1.58829	1.39914	1.77743	7.2976e-61	2.38621e-58
101	ADAM8	0.266686	0.0936908	0.43968	0.00251572	0.00527814
102	ADAM10	0.441	0.0718012	0.810199	0.0192253	0.0333428
103	ADAR	0.417132	0.108624	0.725641	0.00804794	0.0152139
104	ADARB1	-2.50972	-3.40917	-1.61028	4.52867e-08	2.3057e-07
105	ADARB2	-0.106885	-0.404551	0.19078	0.481569	0.555889
107	ADCY1	0.0390035	-0.267971	0.345978	0.803339	0.8439
108	ADCY2	0.420579	0.210392	0.630766	8.78766e-05	0.000248734
109	ADCY3	0.674281	0.293551	1.05501	0.000518248	0.00124726
111	ADCY5	-0.386344	-0.914022	0.141334	0.151285	0.207381
112	ADCY6	-1.26468	-1.98514	-0.544211	0.00058076	0.00138462
113	ADCY7	-1.2362	-1.80425	-0.668146	1.99641e-05	6.41876e-05
114	ADCY8	0.0260258	-0.355774	0.407826	0.893717	0.918107
115	ADCY9	-2.02762	-2.81478	-1.24046	4.45005e-07	1.93015e-06
116	ADCYAP1	-0.600107	-0.778122	-0.422092	3.91529e-11	3.2714e-10
117	ADCYAP1R1	-0.80112	-1.23677	-0.365467	0.000313154	0.000787668
118	ADD1	-1.6221	-2.50521	-0.73899	0.000318129	0.000799171
119	ADD2	0.885021	0.50455	1.26549	5.13691e-06	1.85311e-05
120	ADD3	0.144659	-0.324008	0.613327	0.545203	0.61574
123	PLIN2	-0.965438	-1.6075	-0.323377	0.00320763	0.00657985
124	ADH1A	-1.82181	-2.44925	-1.19436	1.26457e-08	7.08185e-08
125	ADH1B	-4.08034	-5.17054	-2.99015	2.20598e-13	2.46198e-12
126	ADH1C	-0.512439	-1.43186	0.406984	0.274665	0.346163
127	ADH4	-0.157543	-0.542061	0.226975	0.421958	0.497244
128	ADH5	-0.13679	-0.619563	0.345984	0.578663	0.647232
130	ADH6	-0.643614	-1.05325	-0.233981	0.00207354	0.0044345
131	ADH7	1.77176	1.00524	2.53829	5.88987e-06	2.10292e-05
132	ADK	0.445067	0.151135	0.739	0.00299995	0.00619269
133	ADM	1.53598	1.22747	1.84449	1.70604e-22	4.73112e-21
134	ADORA1	-0.261532	-0.664074	0.141009	0.202878	0.267235
135	ADORA2A	-1.15199	-2.9831	0.679116	0.217554	0.283811
136	ADORA2B	1.08443	0.627432	1.54144	3.3055e-06	1.23473e-05
140	ADORA3	-0.529499	-0.73222	-0.326777	3.06639e-07	1.36514e-06
141	ADPRH	-2.03843	-2.82417	-1.25269	3.68211e-07	1.61983e-06
142	PARP1	2.3398	1.84108	2.83852	3.73861e-20	8.34918e-19
143	PARP4	-1.18637	-1.74797	-0.624771	3.46717e-05	0.000106088
146	ADRA1D	-0.160956	-0.628688	0.306777	0.500019	0.5738
147	ADRA1B	-0.382174	-0.997856	0.233507	0.223751	0.290743
148	ADRA1A	-2.06287	-3.04263	-1.0831	3.68079e-05	0.00011206
150	ADRA2A	-0.559338	-0.987417	-0.131259	0.0104391	0.0192298
151	ADRA2B	0.42413	0.0248166	0.823443	0.0373633	0.0604459
152	ADRA2C	0.0606296	-0.234741	0.356	0.687453	0.744916
153	ADRB1	-1.98442	-2.93882	-1.03003	4.59636e-05	0.000137358
154	ADRB2	-2.51878	-3.12878	-1.90879	5.81751e-16	8.68187e-15
155	ADRB3	0.265848	-0.166851	0.698548	0.228516	0.295847
156	GRK2	0.265062	0.0363627	0.493761	0.023111	0.0393561
157	GRK3	-0.794437	-1.12278	-0.466095	2.11402e-06	8.151e-06
158	ADSL	1.70468	1.35104	2.05831	3.4591e-21	8.59207e-20
159	ADSS	1.35241	0.976961	1.72786	1.66491e-12	1.67239e-11
160	AP2A1	0.70121	0.502533	0.899888	4.59768e-12	4.3813e-11
161	AP2A2	-1.36902	-1.80038	-0.937656	4.9606e-10	3.48994e-09
162	AP1B1	0.730209	0.385044	1.07537	3.37791e-05	0.000103646
163	AP2B1	-0.0558496	-0.568154	0.456454	0.830806	0.866769
164	AP1G1	0.243151	-0.192695	0.678996	0.274206	0.345724
165	AEBP1	0.0130515	-0.242988	0.269091	0.920417	0.939457
166	AES	-1.05466	-1.2713	-0.838024	1.40429e-21	3.61518e-20
167	CRISP1	0.223896	0.0298414	0.41795	0.0237367	0.040312
172	AFG3L1P	-0.3337	-1.00099	0.333589	0.327015	0.4012
173	AFM	0.351439	-0.207439	0.910318	0.217769	0.284031
174	AFP	0.348988	-0.0727465	0.770722	0.104829	0.150074
175	AGA	0.0718204	-0.168089	0.31173	0.557376	0.626815
176	ACAN	0.293719	-0.0444947	0.631933	0.0887337	0.129806
177	AGER	-4.53656	-6.13638	-2.93674	2.73168e-08	1.44835e-07
178	AGL	0.436325	0.0368597	0.835791	0.032289	0.0529957
181	AGRP	-1.84004	-3.25135	-0.428744	0.010607	0.0195138
182	JAG1	1.94022	1.49363	2.38681	1.66416e-17	2.90738e-16
183	AGT	-0.487652	-0.787008	-0.188297	0.00140901	0.00312309
185	AGTR1	-2.86996	-3.77383	-1.96609	4.86942e-10	3.4313e-09
186	AGTR2	-1.55773	-2.01229	-1.10318	1.85924e-11	1.64111e-10
187	APLNR	-0.615054	-1.00378	-0.226332	0.00192774	0.00415761
189	AGXT	0.25754	-0.0944966	0.609576	0.151614	0.207779
190	NR0B1	0.804	0.591437	1.01656	1.2313e-13	1.42426e-12
191	AHCY	2.05456	1.14266	2.96646	1.00595e-05	3.43438e-05
196	AHR	-0.597239	-0.908511	-0.285967	0.000169514	0.000451187
197	AHSG	0.919925	0.653965	1.18588	1.20772e-11	1.09125e-10
199	AIF1	-1.27648	-1.93778	-0.615186	0.000154782	0.000415764
202	AIM1	0.292645	0.119607	0.465684	0.000917328	0.00210504
203	AK1	-3.21469	-3.8791	-2.55029	2.46668e-21	6.19725e-20
204	AK2	-0.386963	-1.24749	0.473559	0.378121	0.453786
205	AK4	3.0033	2.38377	3.62283	2.07191e-21	5.26582e-20
207	AKT1	-0.0336143	-0.428358	0.361129	0.867449	0.896672
208	AKT2	0.505955	0.0744	0.937509	0.0215697	0.036964
210	ALAD	-0.181885	-0.868984	0.505214	0.603879	0.670409
211	ALAS1	-1.617	-2.47944	-0.754564	0.000238056	0.000613279
212	ALAS2	-1.06975	-1.86461	-0.27488	0.00834566	0.0157374
213	ALB	0.0572475	-0.187864	0.302359	0.647123	0.709745
214	ALCAM	-0.618135	-0.79361	-0.44266	5.0471e-12	4.77849e-11
215	ABCD1	-0.262304	-1.1751	0.650493	0.573285	0.642069
216	ALDH1A1	-0.464723	-0.6389	-0.290545	1.7008e-07	7.87262e-07
217	ALDH2	-2.97482	-3.40419	-2.54545	5.32116e-42	6.77767e-40
218	ALDH3A1	1.18978	0.742059	1.63751	1.90454e-07	8.75099e-07
219	ALDH1B1	0.668275	0.328391	1.00816	0.000116367	0.000320877
220	ALDH1A3	0.235697	-0.0652756	0.53667	0.124813	0.175113
221	ALDH3B1	-3.01294	-4.57011	-1.45577	0.000149264	0.000402274
222	ALDH3B2	2.0704	1.56442	2.57639	1.05907e-15	1.53554e-14
223	ALDH9A1	-0.412459	-0.651678	-0.173241	0.00072655	0.00169875
224	ALDH3A2	-0.427053	-0.601038	-0.253068	1.50322e-06	5.95958e-06
225	ABCD2	-0.417401	-0.787854	-0.0469472	0.02722	0.0455149
226	ALDOA	2.20327	1.37075	3.03578	2.13621e-07	9.73787e-07
229	ALDOB	0.23293	-0.624561	1.09042	0.594444	0.661473
230	ALDOC	1.88005	1.33645	2.42364	1.21343e-11	1.09579e-10
231	AKR1B1	0.139661	-0.100332	0.379654	0.254046	0.324149
238	ALK	0.0737544	-0.292946	0.440455	0.693428	0.750204
239	ALOX12	1.28754	0.88932	1.68577	2.34304e-10	1.73182e-09
240	ALOX5	-2.51092	-3.38663	-1.63521	1.91176e-08	1.0429e-07
241	ALOX5AP	-2.47791	-3.44117	-1.51466	4.60941e-07	1.99374e-06
242	ALOX12B	1.19148	0.953762	1.42919	8.89354e-23	2.52383e-21
245	ALOX12P2	1.28109	0.865167	1.69702	1.57104e-09	1.00963e-08
246	ALOX15	-0.443784	-0.961356	0.0737885	0.0928525	0.135128
247	ALOX15B	-1.99152	-2.86631	-1.11673	8.12049e-06	2.82118e-05
248	ALPI	0.226564	-0.24015	0.693278	0.341373	0.415725
249	ALPL	-1.67988	-2.10765	-1.25212	1.39205e-14	1.80242e-13
250	ALPP	-0.895659	-1.78356	-0.00776	0.0480311	0.0756426
251	ALPPL2	-0.154078	-1.01792	0.70977	0.726652	0.779717
257	ALX3	0.473369	-0.107664	1.0544	0.110313	0.15687
258	AMBN	0.296196	0.100802	0.491591	0.00296751	0.00613149
259	AMBP	-0.511225	-1.02701	0.00455969	0.05206	0.0812054
262	AMD1	0.462038	0.132989	0.791087	0.00592138	0.0115117
265	AMELX	0.15946	-0.0271523	0.346072	0.0939761	0.136473
266	AMELY	0.329073	0.0656599	0.592486	0.0143446	0.025654
267	AMFR	0.0775804	-0.142481	0.297642	0.489587	0.563719
268	AMH	0.734096	0.343559	1.12463	0.000229458	0.000593292
269	AMHR2	-0.150754	-0.929057	0.627549	0.704215	0.759623
270	AMPD1	-1.03744	-1.63833	-0.436541	0.000714791	0.00167411
271	AMPD2	-0.161035	-0.637928	0.315859	0.508081	0.581437
272	AMPD3	0.632746	0.32917	0.936323	4.40459e-05	0.000132186
273	AMPH	0.122584	-0.272089	0.517258	0.542685	0.613474
274	BIN1	-0.922093	-1.43494	-0.409244	0.000425122	0.00104074
275	AMT	-2.02588	-2.57506	-1.4767	4.8247e-13	5.17375e-12
276	AMY1A	-1.14633	-1.57318	-0.719475	1.41307e-07	6.62583e-07
279	AMY2A	-1.33498	-1.58054	-1.08941	1.65118e-26	6.54141e-25
280	AMY2B	-1.14058	-1.44084	-0.840324	9.67295e-14	1.13142e-12
283	ANG	-2.54924	-3.09706	-2.00142	7.47723e-20	1.63484e-18
284	ANGPT1	-2.84927	-3.84675	-1.85178	2.16184e-08	1.16855e-07
285	ANGPT2	0.224707	-0.111795	0.56121	0.190598	0.253022
286	ANK1	0.218852	-0.114097	0.551802	0.197638	0.261149
287	ANK2	-1.8498	-2.59173	-1.10787	1.02566e-06	4.1797e-06
288	ANK3	-0.988558	-1.51456	-0.462557	0.000230032	0.000594706
290	ANPEP	-1.63495	-2.21226	-1.05764	2.84614e-08	1.5043e-07
291	SLC25A4	-1.65785	-2.17721	-1.13848	3.94262e-10	2.81718e-09
292	SLC25A5	1.43608	0.948187	1.92397	7.97362e-09	4.60792e-08
293	SLC25A6	0.280134	0.0105913	0.549678	0.0416523	0.0666266
301	ANXA1	-0.253052	-0.559534	0.0534308	0.105604	0.150987
302	ANXA2	0.12451	-0.259739	0.508758	0.525365	0.597379
303	ANXA2P1	0.225606	0.0386736	0.412538	0.0180081	0.031451
304	ANXA2P2	0.0689389	-0.132437	0.270315	0.502238	0.575698
305	ANXA2P3	0.151186	-0.159055	0.461427	0.339515	0.41394
306	ANXA3	-2.36452	-3.11817	-1.61086	7.78942e-10	5.28821e-09
307	ANXA4	-1.35378	-1.9779	-0.729658	2.12492e-05	6.79405e-05
308	ANXA5	-1.58726	-2.06827	-1.10626	9.95401e-11	7.74955e-10
309	ANXA6	-1.44757	-1.81824	-1.0769	1.94481e-14	2.46425e-13
310	ANXA7	-0.0143401	-0.236151	0.207471	0.899169	0.922756
311	ANXA11	-1.94078	-2.40257	-1.47898	1.76512e-16	2.78604e-15
312	ANXA13	0.326801	0.0109707	0.642631	0.0425556	0.0679277
313	AOAH	-0.269212	-0.567476	0.0290526	0.0768851	0.114437
314	AOC2	-0.240976	-0.736926	0.254973	0.340932	0.415322
316	AOX1	-2.20918	-2.69675	-1.72162	6.64547e-19	1.33201e-17
317	APAF1	-0.512249	-0.994872	-0.0296251	0.0375004	0.0606541
318	NUDT2	0.674979	0.476938	0.873019	2.3875e-11	2.07068e-10
319	APOF	0.0726228	-0.167156	0.312402	0.552765	0.622493
320	APBA1	0.358759	0.184901	0.532616	5.24526e-05	0.000155099
321	APBA2	1.13279	0.867466	1.39811	5.85864e-17	9.59275e-16
322	APBB1	-2.23889	-2.94568	-1.53211	5.34604e-10	3.74109e-09
323	APBB2	-1.17031	-1.75253	-0.588085	8.15982e-05	0.000232465
324	APC	-1.15037	-1.63395	-0.666789	3.12412e-06	1.17248e-05
325	APCS	0.0903711	-0.414062	0.594804	0.725487	0.778658
326	AIRE	0.111635	-0.128211	0.351481	0.361635	0.43686
327	APEH	-0.151475	-0.581968	0.279018	0.49042	0.56453
328	APEX1	1.30049	0.902218	1.69876	1.5543e-10	1.1746e-09
329	BIRC2	-0.326084	-0.582139	-0.0700285	0.0125605	0.0227286
330	BIRC3	-0.89745	-1.39239	-0.402506	0.000379592	0.000938187
331	XIAP	0.217867	-0.117172	0.552906	0.202482	0.266793
332	BIRC5	4.39424	2.82409	5.96439	4.13043e-08	2.11227e-07
333	APLP1	-0.0889825	-0.463314	0.285349	0.641284	0.704718
334	APLP2	-1.41134	-2.18405	-0.638627	0.000343817	0.000857508
335	APOA1	-0.231891	-1.10891	0.64513	0.604298	0.670735
336	APOA2	0.422485	0.0568462	0.788124	0.0235322	0.0400019
337	APOA4	0.223959	-0.175628	0.623547	0.27198	0.343412
338	APOB	-0.146516	-0.530757	0.237724	0.454846	0.529787
339	APOBEC1	0.165001	-0.0922199	0.422222	0.208656	0.273743
341	APOC1	-1.12178	-1.72653	-0.517033	0.000277286	0.000705795
342	APOC1P1	0.0276907	-0.717743	0.773124	0.94196	0.955303
343	AQP8	-0.244855	-0.791826	0.302115	0.380274	0.455896
344	APOC2	-0.671155	-1.96018	0.617868	0.307495	0.380943
345	APOC3	0.382432	-0.00534028	0.770204	0.0532397	0.0827568
346	APOC4	0.110153	-2.87776	3.09807	0.942398	0.955659
347	APOD	-0.944745	-1.14436	-0.745133	1.75416e-20	4.0241e-19
348	APOE	-0.0367322	-0.348175	0.274711	0.817189	0.855415
350	APOH	-2.20416	-3.48138	-0.92694	0.000718534	0.00168198
351	APP	0.123178	-0.174527	0.420883	0.417392	0.492685
353	APRT	0.920833	0.561897	1.27977	4.95139e-07	2.12738e-06
354	KLK3	0.022404	-0.389133	0.433941	0.915027	0.935349
355	FAS	-1.28802	-1.63238	-0.943665	2.28494e-13	2.54298e-12
356	FASLG	-0.410892	-0.610432	-0.211353	5.43777e-05	0.000160251
357	SHROOM2	0.509608	0.28053	0.738685	1.29971e-05	4.33727e-05
358	AQP1	-3.30606	-4.28926	-2.32286	4.38402e-11	3.62434e-10
359	AQP2	-0.333681	-0.85047	0.183107	0.205687	0.270383
360	AQP3	-0.866604	-1.09358	-0.63963	7.24842e-14	8.62566e-13
361	AQP4	-2.83455	-3.76424	-1.90487	2.28963e-09	1.43893e-08
362	AQP5	-0.84136	-1.12984	-0.552879	1.08888e-08	6.15933e-08
363	AQP6	-0.043118	-0.443619	0.357383	0.832879	0.868478
364	AQP7	-1.00691	-2.84565	0.831831	0.28314	0.355161
366	AQP9	-1.34373	-2.06645	-0.621023	0.000268273	0.000685403
367	AR	-1.40379	-1.82104	-0.986544	4.27802e-11	3.55011e-10
368	ABCC6	-2.46213	-3.45103	-1.47323	1.06166e-06	4.3168e-06
369	ARAF	-0.78979	-1.10399	-0.475589	8.3649e-07	3.45966e-06
372	ARCN1	0.342549	0.145731	0.539367	0.000646799	0.00152728
373	TRIM23	-1.04623	-1.29641	-0.79606	2.47295e-16	3.84236e-15
374	AREG	-0.962815	-1.67284	-0.252794	0.00786563	0.0148976
375	ARF1	0.367591	0.193807	0.541376	3.3871e-05	0.000103845
377	ARF3	0.486509	0.0933561	0.879662	0.0152929	0.0271571
378	ARF4	-0.332649	-0.506191	-0.159108	0.000172022	0.000457361
379	ARL4D	1.41981	0.874651	1.96497	3.31618e-07	1.47037e-06
381	ARF5	1.06905	0.596001	1.54209	9.45107e-06	3.24434e-05
382	ARF6	0.616295	0.332153	0.900437	2.12728e-05	6.79879e-05
383	ARG1	-0.132712	-0.463972	0.198547	0.432325	0.50755
384	ARG2	0.433024	-0.219253	1.0853	0.193207	0.255911
387	RHOA	-2.16929	-2.63138	-1.7072	3.54246e-20	7.9192e-19
388	RHOB	-1.4465	-2.10628	-0.786725	1.73093e-05	5.63883e-05
389	RHOC	-0.112437	-0.392569	0.167695	0.431474	0.506794
390	RND3	0.838794	0.55327	1.12432	8.51829e-09	4.89813e-08
391	RHOG	-1.00757	-1.53469	-0.480451	0.000179387	0.00047504
392	ARHGAP1	0.0399723	-0.271042	0.350986	0.801119	0.842295
393	ARHGAP4	-0.747522	-1.38351	-0.111538	0.0212395	0.0364637
394	ARHGAP5	-0.305157	-0.782969	0.172654	0.210663	0.276013
395	ARHGAP6	-2.60316	-3.53064	-1.67567	3.77672e-08	1.95188e-07
396	ARHGDIA	-0.0547846	-0.227421	0.117852	0.533957	0.605545
397	ARHGDIB	-1.69889	-2.14791	-1.24987	1.21048e-13	1.40239e-12
398	ARHGDIG	0.174405	-0.338243	0.687053	0.504908	0.57835
399	RHOH	-0.0269812	-0.426922	0.37296	0.894806	0.919111
400	ARL1	0.660872	0.331785	0.98996	8.28516e-05	0.00023576
401	PHOX2A	0.349676	-0.217641	0.916992	0.227024	0.294247
402	ARL2	-0.548852	-0.751344	-0.346361	1.08141e-07	5.17621e-07
403	ARL3	-0.53028	-0.862663	-0.197897	0.00176659	0.00383953
405	ARNT	-0.995378	-1.48516	-0.505592	6.79994e-05	0.000196509
406	ARNTL	-0.0287209	-0.319703	0.262261	0.846603	0.879397
407	ARR3	0.250425	-0.0255529	0.526403	0.0753234	0.112349
408	ARRB1	-4.08503	-5.49211	-2.67795	1.26923e-08	7.10431e-08
409	ARRB2	-2.25629	-3.06532	-1.44725	4.60068e-08	2.33855e-07
410	ARSA	0.0480346	-0.163639	0.259708	0.656486	0.717715
411	ARSB	-0.516005	-0.857012	-0.174998	0.00301919	0.00623005
412	STS	-1.4569	-2.4374	-0.476409	0.00358797	0.00727961
414	ARSD	-1.03392	-1.21425	-0.853595	2.66632e-29	1.32158e-27
415	ARSE	-0.746719	-1.11435	-0.379088	6.8623e-05	0.000198232
416	ARSF	-0.130811	-0.5399	0.278278	0.530841	0.602698
417	ART1	-0.430511	-1.69945	0.838424	0.506078	0.579539
419	ART3	0.0607995	-0.15652	0.278119	0.583458	0.651632
420	ART4	-1.9429	-2.60139	-1.28441	7.33971e-09	4.26521e-08
421	ARVCF	0.143677	-0.307923	0.595278	0.532912	0.604611
427	ASAH1	-2.36588	-3.21899	-1.51276	5.46733e-08	2.75036e-07
429	ASCL1	0.444214	0.163524	0.724904	0.00192348	0.00414924
430	ASCL2	1.26674	1.06492	1.46856	8.84901e-35	6.63919e-33
432	ASGR1	-1.00454	-1.87349	-0.135583	0.023465	0.0399
433	ASGR2	-0.811707	-1.16194	-0.46147	5.56177e-06	1.99325e-05
434	ASIP	0.244248	-0.217745	0.706241	0.300109	0.373268
435	ASL	-1.36686	-1.59738	-1.13633	3.21755e-31	1.84529e-29
438	ASMT	0.210231	-0.0450454	0.465508	0.106503	0.152133
439	ASNA1	0.635321	0.274847	0.995796	0.000551616	0.00132045
440	ASNS	2.05441	1.73613	2.37268	1.10003e-36	9.52546e-35
443	ASPA	-2.98361	-4.50329	-1.46392	0.000119087	0.000327649
444	ASPH	0.53863	0.167853	0.909406	0.0044098	0.00877952
445	ASS1	-0.0364772	-0.381652	0.308698	0.835913	0.870857
460	ASTN1	-0.290316	-0.557241	-0.0233908	0.0330301	0.0540987
462	SERPINC1	-0.380431	-0.554156	-0.206705	1.77066e-05	5.758e-05
463	ZFHX3	-0.698748	-0.918135	-0.47936	4.30711e-10	3.06265e-09
466	ATF1	0.32008	0.0543546	0.585806	0.0182318	0.0318061
467	ATF3	-1.04311	-1.37202	-0.714192	5.1074e-10	3.58746e-09
468	ATF4	0.479299	0.258931	0.699667	2.01778e-05	6.47984e-05
471	ATIC	1.48786	0.969037	2.00667	1.90142e-08	1.03855e-07
472	ATM	-0.269618	-0.630283	0.0910466	0.142869	0.197127
473	RERE	-0.789896	-1.14294	-0.436854	1.15867e-05	3.90767e-05
474	ATOH1	0.560475	0.293364	0.827586	3.91292e-05	0.000118617
475	ATOX1	0.053372	-0.282035	0.388779	0.755131	0.803594
476	ATP1A1	-0.41823	-0.592121	-0.24434	2.42912e-06	9.24552e-06
477	ATP1A2	-2.04357	-3.28211	-0.805038	0.00122101	0.00274105
478	ATP1A3	0.464165	0.21249	0.71584	0.000300621	0.000759193
479	ATP12A	0.558944	0.136441	0.981448	0.0095169	0.0177172
480	ATP1A4	0.16148	-0.210697	0.533656	0.395111	0.470542
481	ATP1B1	0.198251	0.0255725	0.37093	0.0244349	0.0413854
482	ATP1B2	-0.98741	-1.75342	-0.221402	0.0115219	0.0210562
483	ATP1B3	1.45373	1.12481	1.78264	4.61345e-18	8.62671e-17
486	FXYD2	-0.306831	-0.952603	0.338941	0.351722	0.426355
487	ATP2A1	0.48359	-0.121223	1.0884	0.117085	0.165404
488	ATP2A2	0.670634	0.0654473	1.27582	0.0298615	0.0494188
489	ATP2A3	-0.6952	-1.17309	-0.217307	0.00435548	0.00868085
490	ATP2B1	0.446821	0.272706	0.620936	4.91181e-07	2.11244e-06
491	ATP2B2	0.259632	-0.0972945	0.616558	0.153956	0.210514
492	ATP2B3	0.204595	-0.178637	0.587826	0.295396	0.368496
493	ATP2B4	-1.02702	-1.51593	-0.538107	3.83612e-05	0.00011645
495	ATP4A	0.599112	0.067304	1.13092	0.0272435	0.0455472
496	ATP4B	0.123352	-0.207708	0.454413	0.465221	0.539891
498	ATP5A1	0.416627	-0.0579383	0.891192	0.0853093	0.125341
501	ALDH7A1	-0.634349	-1.17504	-0.093659	0.0214782	0.0368188
506	ATP5B	1.69957	1.18264	2.2165	1.16402e-10	8.95099e-10
509	ATP5C1	0.71085	0.493683	0.928017	1.40344e-10	1.06685e-09
513	ATP5D	0.148945	-0.848849	1.14674	0.769849	0.816432
514	ATP5E	0.855391	-0.362619	2.0734	0.168681	0.227735
515	ATP5F1	0.288783	0.0492192	0.528347	0.018145	0.03167
516	ATP5G1	1.71171	1.19061	2.23282	1.21002e-10	9.28191e-10
517	ATP5G2	0.413335	0.105851	0.720819	0.00842162	0.0158642
518	ATP5G3	1.4482	0.567967	2.32844	0.00126141	0.00282393
520	ATP5G2P1	0.389515	0.106636	0.672395	0.00695895	0.0133313
521	ATP5I	0.537728	0.045977	1.02948	0.0320959	0.0527302
522	ATP5J	0.454943	0.196293	0.713594	0.000565996	0.00135207
523	ATP6V1A	0.496424	0.186977	0.805871	0.00166523	0.00363583
525	ATP6V1B1	-0.189585	-1.06408	0.684907	0.670903	0.730588
526	ATP6V1B2	-1.25476	-1.85498	-0.654537	4.18012e-05	0.000125932
527	ATP6V0C	-0.267168	-0.518935	-0.0154015	0.0375382	0.0606935
528	ATP6V1C1	0.771781	0.456085	1.08748	1.65523e-06	6.52679e-06
529	ATP6V1E1	0.223933	0.0171817	0.430683	0.033767	0.0551735
533	ATP6V0B	-0.0579089	-0.234095	0.118277	0.519444	0.592196
534	ATP6V1G2	-0.264459	-0.573113	0.0441955	0.0930895	0.13541
535	ATP6V0A1	-0.882326	-1.52269	-0.24196	0.00692293	0.0132693
537	ATP6AP1	-0.511576	-0.823802	-0.19935	0.00132106	0.00294633
538	ATP7A	-0.206341	-0.478068	0.0653856	0.136662	0.189721
539	ATP5O	0.125562	-0.11554	0.366663	0.307388	0.380875
540	ATP7B	-0.736028	-1.15274	-0.319313	0.000536566	0.00128738
541	ALDH7A1P1	-0.851287	-1.75088	0.0483059	0.0636364	0.0967888
545	ATR	1.55594	0.738123	2.37376	0.000192297	0.000505379
546	ATRX	-0.316307	-0.70726	0.0746463	0.112798	0.160061
547	KIF1A	0.923344	0.544221	1.30247	1.811e-06	7.08362e-06
549	AUH	-0.571362	-0.829683	-0.313041	1.45689e-05	4.81484e-05
550	AUP1	1.6539	1.43125	1.87655	5.12366e-48	9.12595e-46
551	AVP	0.53775	-0.128315	1.20381	0.113562	0.160978
552	AVPR1A	0.0722551	-0.236149	0.380659	0.646095	0.708831
553	AVPR1B	0.461508	-0.104185	1.0272	0.109822	0.156233
554	AVPR2	-1.14938	-1.95805	-0.340714	0.00534038	0.0104761
558	AXL	-1.56154	-1.75128	-1.3718	1.5574e-58	4.61075e-56
563	AZGP1	-1.01923	-1.45229	-0.58618	3.96954e-06	1.4611e-05
566	AZU1	-0.916221	-1.91805	0.0856065	0.0730554	0.109428
567	B2M	-1.06518	-1.40836	-0.721992	1.17693e-09	7.7152e-09
570	BAAT	0.416311	-0.121941	0.954563	0.129536	0.180987
571	BACH1	-0.323511	-0.892181	0.24516	0.26485	0.335627
572	BAD	-0.0044496	-0.176877	0.167978	0.959662	0.969084
573	BAG1	-0.626221	-1.10432	-0.148119	0.0102532	0.0189295
575	ADGRB1	0.661121	0.451482	0.87076	6.37108e-10	4.38923e-09
576	ADGRB2	0.736626	0.176129	1.29712	0.00999922	0.0185097
577	ADGRB3	-1.69929	-2.42936	-0.969215	5.06861e-06	1.83089e-05
578	BAK1	1.06531	0.396031	1.73458	0.00181013	0.00392597
579	NKX3-2	1.11954	0.51462	1.72446	0.000286339	0.000726813
580	BARD1	1.80137	1.60681	1.99592	1.34456e-73	7.96126e-71
581	BAX	0.0857965	-0.163153	0.334746	0.499377	0.573214
582	BBS1	-1.64846	-1.86978	-1.42714	2.88058e-48	5.21552e-46
583	BBS2	-1.13137	-1.55795	-0.704795	2.01178e-07	9.20513e-07
585	BBS4	-0.558016	-0.987855	-0.128178	0.0109458	0.0200771
586	BCAT1	0.0493913	-0.343238	0.442021	0.805252	0.845667
587	BCAT2	0.18788	-0.095785	0.471544	0.194238	0.257106
590	BCHE	-0.592051	-1.03907	-0.145032	0.00943548	0.0175851
593	BCKDHA	-0.133363	-0.663407	0.396681	0.621913	0.686922
594	BCKDHB	-0.277427	-0.694347	0.139493	0.192165	0.254809
595	CCND1	-0.527708	-0.702315	-0.3531	3.15155e-09	1.93076e-08
596	BCL2	0.0924663	-0.0809547	0.265887	0.296008	0.369177
597	BCL2A1	-0.815462	-1.53831	-0.0926113	0.0270307	0.0452433
598	BCL2L1	-0.490648	-0.750351	-0.230945	0.000213151	0.000554794
599	BCL2L2	-0.83211	-1.04821	-0.616008	4.4558e-14	5.42019e-13
602	BCL3	-0.366771	-0.646094	-0.0874476	0.0100656	0.0186153
604	BCL6	-0.458645	-0.734024	-0.183266	0.00109725	0.00248435
605	BCL7A	1.56926	1.10553	2.03299	3.2995e-11	2.79418e-10
607	BCL9	0.388914	-0.619776	1.3976	0.449835	0.524899
608	TNFRSF17	0.406655	0.105003	0.708307	0.00823665	0.0155425
610	HCN2	0.722914	0.385031	1.0608	2.74785e-05	8.57793e-05
611	OPN1SW	-0.0131732	-0.256326	0.22998	0.915436	0.935571
613	BCR	0.936213	0.312233	1.56019	0.0032746	0.00669715
617	BCS1L	0.423515	-0.058891	0.90592	0.085306	0.125341
618	BCYRN1	0.232705	-0.0118158	0.477227	0.0621458	0.0947915
622	BDH1	1.76695	1.10283	2.43108	1.84165e-07	8.48692e-07
623	BDKRB1	0.626902	0.445195	0.80861	1.36111e-11	1.2206e-10
624	BDKRB2	0.146502	-0.139134	0.432137	0.314771	0.388398
627	BDNF	-0.416324	-0.840261	0.00761259	0.0542583	0.0841491
629	CFB	-0.0993055	-0.369002	0.170391	0.470489	0.545225
631	BFSP1	0.279983	0.0937131	0.466253	0.00321883	0.00659665
632	BGLAP	0.320734	-0.0352711	0.676739	0.0774326	0.115111
633	BGN	0.335067	-0.100236	0.77037	0.131389	0.183331
634	CEACAM1	0.340914	0.124765	0.557063	0.00199293	0.00428176
635	BHMT	0.554617	0.226115	0.883118	0.000936127	0.00214548
636	BICD1	0.324579	-0.0543239	0.703482	0.0931597	0.135494
637	BID	1.38691	1.13905	1.63478	5.52361e-28	2.48483e-26
638	BIK	2.00434	1.36063	2.64806	1.04225e-09	6.89005e-09
639	PRDM1	0.496321	0.204084	0.788557	0.000872511	0.00201083
640	BLK	-0.0273299	-0.2222	0.16754	0.783409	0.827507
641	BLM	3.17257	2.67642	3.66872	4.94024e-36	4.08418e-34
642	BLMH	1.29872	0.916555	1.68088	2.72674e-11	2.33806e-10
643	CXCR5	0.307021	0.00922685	0.604815	0.0433117	0.0690039
644	BLVRA	-0.724537	-0.919078	-0.529996	2.88705e-13	3.17677e-12
645	BLVRB	-0.163027	-0.582329	0.256275	0.446034	0.521269
646	BNC1	2.33861	1.64055	3.03666	5.16026e-11	4.21517e-10
648	BMI1	-0.0700768	-0.314029	0.173875	0.573427	0.642163
649	BMP1	0.851791	0.185638	1.51794	0.0122054	0.0221672
650	BMP2	-1.69817	-2.49163	-0.904713	2.73174e-05	8.53372e-05
651	BMP3	-0.301082	-1.00067	0.398503	0.398941	0.474407
652	BMP4	-1.06159	-1.24213	-0.881051	9.89398e-31	5.54367e-29
653	BMP5	-2.15848	-3.21751	-1.09945	6.47672e-05	0.000187961
654	BMP6	-1.37117	-1.8584	-0.883945	3.47173e-08	1.80603e-07
655	BMP7	2.33922	1.50974	3.16869	3.25156e-08	1.70202e-07
656	BMP8B	1.16832	0.793638	1.543	9.86889e-10	6.56169e-09
657	BMPR1A	-1.06843	-1.76793	-0.368921	0.00275657	0.00573783
658	BMPR1B	-0.292077	-0.606312	0.0221573	0.0684909	0.10329
659	BMPR2	-1.54333	-2.12178	-0.96488	1.70169e-07	7.87506e-07
660	BMX	-1.66471	-2.62137	-0.708062	0.000648145	0.00153013
661	POLR3D	1.20993	0.97496	1.4449	5.96469e-24	1.88021e-22
662	BNIP1	0.286427	0.0442514	0.528602	0.020444	0.0352473
663	BNIP2	-1.19904	-2.05509	-0.34298	0.00604691	0.0117349
664	BNIP3	1.38837	1.07658	1.70017	2.60565e-18	4.97686e-17
665	BNIP3L	-0.476191	-0.886433	-0.0659497	0.0229033	0.0390236
666	BOK	-1.07823	-1.6558	-0.500658	0.000253274	0.000649193
667	DST	-0.365725	-0.942077	0.210627	0.213611	0.279423
668	FOXL2	1.51287	1.23334	1.79241	2.75161e-26	1.06506e-24
669	BPGM	0.667725	0.264542	1.07091	0.00117055	0.00263723
670	BPHL	1.15996	0.516814	1.8031	0.000407866	0.00100264
671	BPI	-0.494101	-0.838199	-0.150004	0.00488714	0.00966138
672	BRCA1	2.33581	1.67021	3.00141	6.06423e-12	5.68973e-11
673	BRAF	0.881352	0.534738	1.22797	6.23798e-07	2.63595e-06
675	BRCA2	1.87583	1.65204	2.09962	1.19607e-60	3.85345e-58
676	BRDT	0.603919	0.428786	0.779052	1.39305e-11	1.24567e-10
677	ZFP36L1	0.0234208	-0.333473	0.380314	0.897658	0.921507
678	ZFP36L2	-1.38638	-1.62365	-1.1491	2.30315e-30	1.25205e-28
680	BRS3	0.193658	-0.00174928	0.389065	0.0520865	0.0812351
682	BSG	0.552971	0.329111	0.776832	1.28913e-06	5.16974e-06
683	BST1	-1.367	-1.91224	-0.821767	8.92465e-07	3.67052e-06
684	BST2	-0.570548	-0.768212	-0.372884	1.53724e-08	8.5137e-08
685	BTC	-0.857792	-1.28755	-0.428034	9.15098e-05	0.000257885
686	BTD	-2.1107	-2.70736	-1.51404	4.10771e-12	3.9332e-11
687	KLF9	-2.12067	-2.81858	-1.42275	2.59227e-09	1.60974e-08
688	KLF5	1.43617	0.964142	1.9082	2.47221e-09	1.54217e-08
689	BTF3	0.232062	-0.0982004	0.562325	0.168454	0.227471
690	BTF3P11	0.340796	0.0833636	0.598228	0.0094686	0.0176378
694	BTG1	0.123678	-0.19858	0.445937	0.451927	0.526947
695	BTK	-2.02488	-2.82559	-1.22417	7.1784e-07	3.00467e-06
696	BTN1A1	0.210645	-0.086477	0.507768	0.164675	0.222986
699	BUB1	3.63178	2.48649	4.77707	5.12755e-10	3.59931e-09
701	BUB1B	4.07653	2.76693	5.38614	1.05431e-09	6.96554e-09
705	BYSL	2.07357	1.65967	2.48746	9.30568e-23	2.63396e-21
706	TSPO	-0.353911	-0.532613	-0.175208	0.000103769	0.000289069
708	C1QBP	1.74828	1.44447	2.05209	1.67113e-29	8.49444e-28
710	SERPING1	-2.19049	-2.75404	-1.62693	2.57304e-14	3.21197e-13
711	ERC2-IT1	0.519366	0.225763	0.81297	0.000526202	0.00126529
712	C1QA	-1.28784	-1.93686	-0.638827	0.000100594	0.000281458
713	C1QB	-1.35861	-2.03624	-0.680968	8.51011e-05	0.000241533
714	C1QC	-0.987086	-1.62868	-0.345489	0.00256664	0.0053752
715	C1R	-0.120788	-0.378828	0.137252	0.358903	0.434076
716	C1S	-0.105114	-0.365862	0.155635	0.429465	0.504749
717	C2	-1.7411	-2.6791	-0.803103	0.000274694	0.000699766
718	C3	-1.43395	-1.73853	-1.12937	2.77243e-20	6.26816e-19
719	C3AR1	-0.953227	-1.62386	-0.282591	0.00533879	0.0104739
722	C4BPA	-1.74962	-2.51998	-0.979258	8.53068e-06	2.95245e-05
725	C4BPB	-0.985819	-1.41794	-0.553701	7.77097e-06	2.71266e-05
726	CAPN5	-0.037554	-0.299901	0.224793	0.779046	0.823714
727	C5	-2.1986	-2.59994	-1.79726	6.82586e-27	2.77957e-25
728	C5AR1	-2.15095	-3.15646	-1.14544	2.75673e-05	8.60321e-05
729	C6	-1.30402	-2.22774	-0.380303	0.00565922	0.0110531
730	C7	-2.05517	-2.7111	-1.39924	8.20151e-10	5.53409e-09
731	C8A	-0.613821	-1.03938	-0.188261	0.00469836	0.00931677
732	C8B	-1.8316	-2.84686	-0.816341	0.000406365	0.000999063
733	C8G	0.229987	-0.0571985	0.517173	0.116508	0.164707
734	OSGIN2	-0.650392	-1.30702	0.00623558	0.0522157	0.0814031
735	C9	0.251178	-0.0109874	0.513343	0.0604056	0.0925625
738	VPS51	-0.711432	-0.979618	-0.443245	2.0004e-07	9.15878e-07
740	MRPL49	0.316922	0.143724	0.49012	0.000335279	0.000837547
741	ZNHIT2	0.23683	-0.230987	0.704646	0.32109	0.395126
744	MPPED2	0.749578	0.5593	0.939856	1.1539e-14	1.50923e-13
745	MYRF	-2.55293	-3.13324	-1.97261	6.56347e-18	1.20027e-16
746	TMEM258	0.84805	0.664107	1.03199	1.6222e-19	3.44372e-18
747	DAGLA	-0.595839	-0.872524	-0.319153	2.43482e-05	7.69061e-05
750	GAS8-AS1	0.0189635	-0.321122	0.359049	0.912973	0.933599
752	FMNL1	-1.3083	-1.95593	-0.66066	7.51577e-05	0.00021549
753	LDLRAD4	-0.977962	-1.49023	-0.465696	0.000182742	0.000482933
754	PTTG1IP	-1.10252	-1.89349	-0.31154	0.00629646	0.0121739
755	C21orf2	-1.49862	-2.17023	-0.827014	1.22301e-05	4.10129e-05
757	TMEM50B	-1.96461	-2.7112	-1.21801	2.50313e-07	1.12906e-06
758	MPPED1	0.742626	0.268055	1.2172	0.00216202	0.00460396
759	CA1	-0.415776	-1.46345	0.6319	0.436674	0.511749
760	CA2	-0.932397	-1.60834	-0.256459	0.00685934	0.0131612
761	CA3	-1.70895	-2.25557	-1.16233	8.91834e-10	5.97684e-09
762	CA4	-3.27291	-4.7655	-1.78032	1.72541e-05	5.62168e-05
763	CA5A	0.359933	0.0176492	0.702216	0.0393006	0.0632435
765	CA6	0.463222	0.0739648	0.85248	0.0196804	0.0340379
766	CA7	0.530096	0.355389	0.704802	2.73231e-09	1.69142e-08
767	CA8	-0.628576	-0.858204	-0.398949	8.08805e-08	3.96051e-07
768	CA9	1.69377	1.14483	2.24271	1.47072e-09	9.49058e-09
770	CA11	0.170267	-0.00781182	0.348346	0.0609324	0.0932254
771	CA12	1.77439	1.13837	2.41041	4.55135e-08	2.31616e-07
773	CACNA1A	0.384883	0.0541	0.715666	0.022577	0.0385035
774	CACNA1B	1.20809	0.496517	1.91966	0.000876052	0.00201751
775	CACNA1C	-0.954885	-1.73884	-0.170933	0.016972	0.029815
776	CACNA1D	-2.48995	-3.33611	-1.6438	8.04468e-09	4.64408e-08
777	CACNA1E	0.408704	-0.00755753	0.824965	0.054307	0.0842188
778	CACNA1F	0.380992	-0.0853432	0.847327	0.109316	0.155594
779	CACNA1S	-0.182377	-1.09994	0.735189	0.696857	0.753206
780	DDR1	2.07772	1.00236	3.15307	0.000152546	0.000410159
781	CACNA2D1	0.772398	0.412791	1.13201	2.55611e-05	8.04239e-05
782	CACNB1	-0.38732	-0.705918	-0.0687218	0.0171848	0.0301598
783	CACNB2	-1.67803	-2.1703	-1.18575	2.37354e-11	2.05939e-10
784	CACNB3	0.387753	0.199112	0.576393	5.60775e-05	0.000164736
785	CACNB4	-0.813725	-1.26184	-0.365611	0.000372168	0.000920982
786	CACNG1	-0.172114	-0.664889	0.320662	0.493619	0.567584
788	SLC25A20	-1.52436	-2.37253	-0.676191	0.000427472	0.00104602
790	CAD	2.30001	1.51782	3.0822	8.25164e-09	4.76105e-08
793	CALB1	0.970133	0.63051	1.30976	2.16057e-08	1.16845e-07
794	CALB2	0.424461	0.232649	0.616272	1.44301e-05	4.77256e-05
795	S100G	-0.284868	-0.560899	-0.00883745	0.0431026	0.0687032
796	CALCA	-0.292404	-0.582256	-0.00255245	0.0480164	0.0756249
797	CALCB	0.647477	0.458255	0.8367	1.99257e-11	1.74822e-10
799	CALCR	-0.310809	-0.497921	-0.123698	0.00113123	0.00255416
800	CALD1	-0.328287	-0.675803	0.0192297	0.0640962	0.09738
801	CALM1	-1.45952	-1.86796	-1.05107	2.49471e-12	2.45305e-11
805	CALM2	-0.868159	-1.35659	-0.37973	0.000494449	0.00119447
808	CALM3	-0.176765	-0.406722	0.0531924	0.131914	0.183946
810	CALML3	2.89752	2.0044	3.79064	2.03554e-10	1.51631e-09
811	CALR	0.86402	0.560628	1.16741	2.38155e-08	1.27661e-07
813	CALU	1.64492	1.34089	1.94895	2.84831e-26	1.09861e-24
814	CAMK4	-0.100577	-0.381583	0.180429	0.482989	0.557059
815	CAMK2A	-0.28019	-0.85637	0.29599	0.340534	0.414946
816	CAMK2B	0.720726	0.441984	0.999468	4.02536e-07	1.75882e-06
817	CAMK2D	-0.55025	-0.904891	-0.195608	0.00235784	0.00497596
818	CAMK2G	-0.489943	-0.664039	-0.315846	3.47307e-08	1.80603e-07
819	CAMLG	-0.806321	-1.33551	-0.277129	0.00282318	0.00585927
820	CAMP	-1.97661	-2.86948	-1.08374	1.43192e-05	4.73945e-05
821	CANX	0.249205	-0.0334609	0.531872	0.0839969	0.123711
822	CAPG	-0.601495	-1.17422	-0.0287724	0.039549	0.0636059
823	CAPN1	1.15486	0.442216	1.8675	0.00149228	0.00329002
824	CAPN2	-1.53693	-2.10853	-0.96533	1.36436e-07	6.41564e-07
825	CAPN3	-2.27809	-3.00852	-1.54765	9.79254e-10	6.51686e-09
826	CAPNS1	-0.405124	-0.673609	-0.13664	0.003102	0.00638228
827	CAPN6	-0.0831968	-0.337094	0.1707	0.520718	0.593273
828	CAPS	-1.1223	-1.70226	-0.542343	0.000148954	0.000401487
829	CAPZA1	1.028	0.322823	1.73317	0.00427371	0.00853263
830	CAPZA2	-1.24119	-1.89094	-0.591443	0.000181083	0.000478895
831	CAST	-0.820158	-1.10614	-0.534179	1.89896e-08	1.03747e-07
832	CAPZB	-0.276871	-0.524379	-0.0293627	0.0283448	0.0471939
833	CARS	0.983251	0.550799	1.4157	8.33849e-06	2.89141e-05
834	CASP1	-1.17689	-1.72495	-0.628837	2.56719e-05	8.07148e-05
835	CASP2	1.15348	0.305407	2.00155	0.00768089	0.0145844
836	CASP3	1.33851	0.786526	1.89049	2.00669e-06	7.77134e-06
837	CASP4	-0.912732	-1.47775	-0.347714	0.00154482	0.00339355
838	CASP5	-0.686903	-1.31519	-0.05862	0.0321266	0.0527687
839	CASP6	0.650814	0.250149	1.05148	0.00145438	0.00321454
840	CASP7	-0.550804	-0.795309	-0.306299	1.00882e-05	3.44363e-05
841	CASP8	-0.523696	-1.15255	0.105155	0.102632	0.147344
842	CASP9	-0.729528	-1.05679	-0.402264	1.24758e-05	4.17472e-05
843	CASP10	-0.561631	-1.01992	-0.10334	0.0163094	0.0287455
844	CASQ1	-0.0163111	-0.409145	0.376523	0.935139	0.950233
845	CASQ2	-2.4339	-3.11364	-1.75415	2.25304e-12	2.22341e-11
846	CASR	0.239728	-0.0820101	0.561466	0.144187	0.198745
847	CAT	-2.86498	-3.64056	-2.08939	4.48691e-13	4.83281e-12
857	CAV1	-2.77425	-3.81155	-1.73696	1.58905e-07	7.37736e-07
858	CAV2	-1.96519	-2.75274	-1.17764	1.00466e-06	4.0972e-06
859	CAV3	-1.31808	-2.87926	0.243101	0.097972	0.141544
860	RUNX2	0.732205	0.0263794	1.43803	0.0420308	0.0671732
861	RUNX1	0.528889	0.0515063	1.00627	0.0298986	0.0494728
862	RUNX1T1	-1.86942	-2.46136	-1.27748	6.02237e-10	4.16603e-09
863	CBFA2T3	-1.44115	-2.242	-0.640309	0.000420239	0.00102994
864	RUNX3	0.0251124	-0.147455	0.19768	0.775477	0.820803
865	CBFB	0.686124	0.405961	0.966286	1.58676e-06	6.26809e-06
866	SERPINA6	-0.00293156	-0.436339	0.430475	0.989423	0.991867
867	CBL	-0.0427277	-0.324875	0.239419	0.76661	0.813509
868	CBLB	0.288167	-0.0879287	0.664263	0.133165	0.18536
869	CBLN1	0.0964041	-0.187045	0.379853	0.505024	0.578453
871	SERPINH1	1.1855	0.884734	1.48627	1.11503e-14	1.46101e-13
873	CBR1	1.36313	0.912816	1.81344	2.97547e-09	1.83057e-08
874	CBR3	1.36865	0.837503	1.89979	4.40843e-07	1.91361e-06
881	CCIN	-0.446791	-1.01432	0.120738	0.122832	0.172672
883	KYAT1	0.312019	0.0190268	0.605011	0.0368661	0.0597252
885	CCK	-0.821474	-1.13238	-0.51057	2.23507e-07	1.01505e-06
886	CCKAR	0.419209	0.129842	0.708575	0.00451958	0.00897941
887	CCKBR	0.588085	0.268683	0.907487	0.000307735	0.00077546
889	KRIT1	0.354225	-0.0060901	0.714541	0.054	0.0838138
890	CCNA2	3.48248	2.12699	4.83798	4.76725e-07	2.05714e-06
891	CCNB1	3.88568	2.76329	5.00808	1.15848e-11	1.04963e-10
892	CCNC	0.996665	0.816517	1.17681	2.14201e-27	9.1298e-26
894	CCND2	0.0341417	-0.3028	0.371084	0.842576	0.876255
896	CCND3	-2.47829	-3.37316	-1.58341	5.70002e-08	2.85823e-07
898	CCNE1	2.5624	1.62068	3.50411	9.6594e-08	4.66427e-07
899	CCNF	2.34732	1.33835	3.35629	5.12107e-06	1.84836e-05
900	CCNG1	-0.597741	-1.467	0.271521	0.177738	0.238275
901	CCNG2	-0.282421	-0.521265	-0.043577	0.0204733	0.0352867
902	CCNH	-0.850858	-1.38774	-0.313973	0.00189535	0.0040942
904	CCNT1	0.567169	0.101787	1.03255	0.0169109	0.0297266
905	CCNT2	0.247734	-0.153513	0.648982	0.226239	0.293333
908	CCT6A	2.01193	1.4666	2.55727	4.79419e-13	5.14354e-12
909	CD1A	0.220739	-0.0992231	0.540701	0.176324	0.236596
910	CD1B	-0.375421	-0.719911	-0.03093	0.0326844	0.0535965
911	CD1C	-1.79952	-2.16976	-1.42927	1.63332e-21	4.19002e-20
912	CD1D	-0.807037	-1.2255	-0.388577	0.000156848	0.000420384
913	CD1E	-1.12781	-1.32302	-0.932599	1.00464e-29	5.1666e-28
914	CD2	-0.845968	-1.08872	-0.603212	8.48118e-12	7.80041e-11
915	CD3D	-0.462823	-0.827885	-0.0977607	0.0129614	0.0233846
916	CD3E	-0.494222	-0.786969	-0.201475	0.000936771	0.00214651
917	CD3G	-0.528858	-0.736717	-0.320999	6.13999e-07	2.59782e-06
919	CD247	-1.12899	-1.67562	-0.582366	5.16406e-05	0.000152863
920	CD4	-1.19679	-1.61457	-0.779008	1.97027e-08	1.07215e-07
921	CD5	-0.47475	-0.775079	-0.174422	0.00194667	0.00419471
922	CD5L	-1.36695	-2.56892	-0.164976	0.0258153	0.0434546
923	CD6	-0.608683	-0.912688	-0.304678	8.6994e-05	0.000246395
924	CD7	-0.225355	-0.564268	0.113558	0.192489	0.255177
925	CD8A	-0.687975	-1.10452	-0.27143	0.00120742	0.00271286
926	CD8B	-0.256549	-0.652786	0.139688	0.204439	0.268952
928	CD9	0.721639	0.461451	0.981826	5.44841e-08	2.74147e-07
929	CD14	-0.642593	-1.05086	-0.234325	0.00203631	0.00436247
930	CD19	0.749195	0.469437	1.02895	1.53085e-07	7.12812e-07
931	MS4A1	0.392366	0.0588331	0.725898	0.021128	0.0362838
932	MS4A3	-0.575285	-1.16788	0.0173121	0.057079	0.0880314
933	CD22	-0.676413	-1.24725	-0.105577	0.020208	0.0348733
939	CD27	0.366076	0.0428174	0.689335	0.0264478	0.0443965
940	CD28	0.0501927	-0.243909	0.344294	0.738005	0.789579
941	CD80	-0.409701	-0.984029	0.164627	0.162067	0.219822
942	CD86	-0.992986	-1.53741	-0.448559	0.0003505	0.000871892
943	TNFRSF8	-0.26068	-0.767487	0.246127	0.313396	0.387006
944	TNFSF8	-0.711405	-1.21927	-0.203539	0.00604253	0.0117275
945	CD33	-1.9984	-2.90037	-1.09643	1.40881e-05	4.67073e-05
946	SIGLEC6	-1.41446	-2.06478	-0.764145	2.01717e-05	6.47883e-05
947	CD34	-2.57944	-3.20059	-1.9583	3.98049e-16	6.04748e-15
948	CD36	-2.34873	-3.63336	-1.06409	0.000339093	0.000846496
949	SCARB1	0.0481495	-0.124587	0.220886	0.584838	0.652839
950	SCARB2	-0.764244	-1.16837	-0.360115	0.000210169	0.000547814
951	CD37	-1.45412	-2.02999	-0.878255	7.45537e-07	3.1105e-06
952	CD38	0.238408	-0.104205	0.581022	0.172616	0.232332
953	ENTPD1	-0.587663	-0.868945	-0.30638	4.22516e-05	0.000127167
954	ENTPD2	0.628273	0.0286784	1.22787	0.0400039	0.0642715
955	ENTPD6	0.175838	-1.04469	1.39636	0.777662	0.822647
956	ENTPD3	0.967101	0.534878	1.39932	1.15759e-05	3.9046e-05
957	ENTPD5	0.849134	0.66212	1.03615	5.62618e-19	1.13393e-17
958	CD40	-0.66717	-0.995981	-0.338359	6.98371e-05	0.0002015
959	CD40LG	-0.828083	-1.30224	-0.353924	0.000619492	0.00146881
960	CD44	0.472235	0.0710228	0.873447	0.0210594	0.036183
961	CD47	-1.5276	-2.1589	-0.896296	2.10945e-06	8.1348e-06
962	CD48	-0.805671	-1.2548	-0.356543	0.000438278	0.00107032
963	CD53	-1.12684	-1.76758	-0.486096	0.00056711	0.00135444
965	CD58	-0.467907	-1.06749	0.131674	0.126132	0.17676
966	CD59	-1.68554	-2.1824	-1.18869	2.95033e-11	2.51991e-10
967	CD63	-1.64061	-2.05877	-1.22245	1.47398e-14	1.90401e-13
968	CD68	-1.41067	-2.13283	-0.688504	0.000128889	0.000351854
969	CD69	-1.68483	-2.57795	-0.791698	0.000217868	0.000565929
970	CD70	0.53115	0.191918	0.870382	0.00214919	0.00458011
971	CD72	0.0549665	-0.260853	0.370786	0.733013	0.785197
972	CD74	-1.52563	-1.72857	-1.32268	3.89902e-49	7.23896e-47
973	CD79A	0.610045	0.325612	0.894477	2.62608e-05	8.23182e-05
974	CD79B	0.187722	-0.225856	0.6013	0.373669	0.449281
975	CD81	-1.96212	-2.88906	-1.03518	3.34224e-05	0.000102609
976	ADGRE5	-3.33927	-4.33195	-2.3466	4.30559e-11	3.57028e-10
977	CD151	-1.2889	-1.94739	-0.63042	0.000124851	0.000341777
978	CDA	-0.131955	-0.607833	0.343923	0.586803	0.654633
983	CDK1	3.60913	2.36469	4.85358	1.31369e-08	7.33633e-08
987	LRBA	-0.8065	-1.21262	-0.400376	9.93434e-05	0.00027835
988	CDC5L	0.882896	0.454937	1.31086	5.26631e-05	0.00015568
989	SEPT7	-0.973201	-1.82061	-0.125795	0.024391	0.0413173
990	CDC6	3.30971	1.92347	4.69595	2.87558e-06	1.08524e-05
991	CDC20	3.58239	1.61984	5.54494	0.000346671	0.000863543
993	CDC25A	2.17643	1.24091	3.11194	5.12121e-06	1.84836e-05
994	CDC25B	0.692893	0.511747	0.874039	6.53086e-14	7.84849e-13
995	CDC25C	2.43374	1.28447	3.58301	3.31742e-05	0.000101933
996	CDC27	1.12949	0.482115	1.77687	0.000627167	0.00148508
997	CDC34	0.650696	0.115662	1.18573	0.0171412	0.0300881
998	CDC42	-0.553576	-1.04412	-0.0630338	0.0269794	0.0451746
999	CDH1	1.49302	1.11947	1.86656	4.73571e-15	6.46819e-14
1000	CDH2	0.557553	0.0836439	1.03146	0.0211166	0.0362671
1001	CDH3	2.27098	0.797009	3.74495	0.00252973	0.00530479
1002	CDH4	0.457842	0.05316	0.862524	0.0265937	0.0446073
1003	CDH5	-3.70812	-4.89144	-2.5248	8.15555e-10	5.50776e-09
1004	CDH6	-0.418716	-0.715753	-0.12168	0.00572979	0.011172
1005	CDH7	0.140584	-0.0548181	0.335986	0.158506	0.215833
1006	CDH8	1.05065	0.732087	1.36921	1.01851e-10	7.91165e-10
1007	CDH9	0.236062	0.0410041	0.43112	0.0176931	0.0309725
1008	CDH10	-0.533185	-1.02321	-0.0431635	0.032957	0.0540031
1009	CDH11	-0.450879	-0.672163	-0.229596	6.50926e-05	0.000188806
1010	CDH12	-0.0197398	-0.393317	0.353838	0.917515	0.93715
1012	CDH13	-0.582824	-0.757854	-0.407795	6.73668e-11	5.40019e-10
1013	CDH15	-0.0664355	-0.532234	0.399363	0.779828	0.82442
1014	CDH16	0.522956	0.0582066	0.987706	0.0274235	0.0458098
1015	CDH17	0.386464	0.00182611	0.771102	0.0489222	0.0768858
1016	CDH18	0.386715	0.0648698	0.708561	0.0185224	0.0322695
1017	CDK2	1.51735	1.17419	1.86051	4.46013e-18	8.3515e-17
1018	CDK3	0.47751	-0.566211	1.52123	0.36988	0.445377
1019	CDK4	2.30903	1.47393	3.14412	5.98387e-08	2.98621e-07
1020	CDK5	1.19333	0.678452	1.70821	5.55669e-06	1.99175e-05
1021	CDK6	1.14348	0.583687	1.70328	6.23934e-05	0.000181674
1022	CDK7	0.862482	0.665002	1.05996	1.12864e-17	2.01027e-16
1024	CDK8	1.31129	0.982671	1.6399	5.24391e-15	7.1288e-14
1025	CDK9	-0.533334	-1.11618	0.0495141	0.0728992	0.109224
1026	CDKN1A	-0.572226	-0.980022	-0.16443	0.00595497	0.0115684
1027	CDKN1B	-0.422706	-0.673238	-0.172173	0.000943332	0.00215974
1028	CDKN1C	-1.67393	-1.94868	-1.39918	7.21169e-33	4.77323e-31
1029	CDKN2A	1.15041	0.807468	1.49335	4.87197e-11	3.99614e-10
1030	CDKN2B	-0.473493	-0.874314	-0.0726708	0.0205957	0.0354698
1031	CDKN2C	0.490061	0.060678	0.919443	0.0252906	0.0426697
1032	CDKN2D	0.301136	0.021867	0.580404	0.0345639	0.0563202
1033	CDKN3	3.7367	3.13074	4.34265	1.24705e-33	8.75653e-32
1036	CDO1	-1.90531	-3.06819	-0.742426	0.00132148	0.00294697
1038	CDR1	-0.313509	-0.860487	0.23347	0.261275	0.331809
1039	CDR2	-0.277855	-0.627747	0.0720377	0.119604	0.16866
1040	CDS1	-0.55017	-0.904399	-0.195941	0.00233365	0.00492824
1041	CDSN	0.429378	0.0931546	0.765601	0.0123147	0.0223429
1043	CD52	-2.41995	-3.24459	-1.59532	8.83619e-09	5.06497e-08
1044	CDX1	0.603281	0.0464595	1.1601	0.0337122	0.0551005
1045	CDX2	0.587954	0.148983	1.02692	0.00866091	0.0162716
1046	CDX4	0.224474	-0.0514192	0.500368	0.110784	0.157458
1047	CLGN	0.769041	0.502203	1.03588	1.61645e-08	8.93147e-08
1048	CEACAM5	0.48507	0.0435356	0.926605	0.0313016	0.0515489
1050	CEBPA	-0.536145	-0.715404	-0.356886	4.57205e-09	2.73691e-08
1051	CEBPB	-1.13454	-1.67593	-0.59315	4.00298e-05	0.000121079
1052	CEBPD	-1.37822	-2.33721	-0.419239	0.00485044	0.00959402
1053	CEBPE	0.0560143	-0.494118	0.606147	0.841823	0.875719
1054	CEBPG	1.66577	1.34189	1.98966	6.76011e-24	2.12178e-22
1056	CEL	0.999337	0.407211	1.59146	0.000940144	0.00215356
1057	CELP	0.392228	0.0776428	0.706813	0.0145374	0.0259543
1058	CENPA	4.49479	3.4673	5.52227	9.99577e-18	1.79663e-16
1059	CENPB	0.277305	-0.0569673	0.611578	0.103962	0.148969
1060	CENPC	0.0619647	-0.28836	0.41229	0.728836	0.781602
1062	CENPE	3.52313	2.60636	4.4399	4.99207e-14	6.04902e-13
1063	CENPF	3.79401	2.81207	4.77595	3.65038e-14	4.47774e-13
1066	CES1	-0.434293	-0.667849	-0.200737	0.0002679	0.000684529
1068	CETN1	0.343269	-0.0530046	0.739542	0.0895449	0.130897
1069	CETN2	-0.158317	-0.48173	0.165096	0.337336	0.411673
1070	CETN3	0.27757	-0.0186094	0.57375	0.066237	0.100188
1071	CETP	-0.925408	-1.59828	-0.252534	0.00702722	0.0134491
1072	CFL1	0.459601	0.0712144	0.847987	0.0203765	0.0351364
1073	CFL2	-2.30674	-3.16208	-1.4514	1.25172e-07	5.92025e-07
1075	CTSC	0.0968231	-0.168434	0.36208	0.47435	0.548742
1080	CFTR	-1.98788	-2.28536	-1.69039	3.43137e-39	3.49648e-37
1081	CGA	0.192401	0.0198205	0.364982	0.0288843	0.0479683
1082	CGB3	0.767017	-0.123496	1.65753	0.0913811	0.133208
1084	CEACAM3	-0.396213	-0.925968	0.133541	0.142677	0.196949
1087	CEACAM7	0.444877	-0.0578651	0.94762	0.0828517	0.122214
1088	CEACAM8	-1.23119	-2.35334	-0.109038	0.0315227	0.0518857
1089	CEACAM4	-0.488846	-0.999967	0.0222755	0.0608553	0.0931397
1101	CHAD	0.0917422	-0.288464	0.471948	0.636262	0.700358
1102	RCBTB2	-1.01073	-1.35093	-0.670521	5.78312e-09	3.41209e-08
1103	CHAT	-0.0534253	-0.551925	0.445075	0.833626	0.869008
1104	RCC1	2.23414	1.60356	2.86473	3.80995e-12	3.66572e-11
1105	CHD1	-0.951751	-1.46719	-0.436317	0.000295653	0.0007482
1106	CHD2	-0.488871	-1.23819	0.26045	0.200996	0.265059
1107	CHD3	-0.108186	-0.465089	0.248717	0.552436	0.622218
1108	CHD4	0.577253	0.150065	1.00444	0.00808573	0.0152775
1109	AKR1C4	0.570639	0.381686	0.759592	3.23701e-09	1.98035e-08
1111	CHEK1	3.46565	2.31123	4.62008	4.00619e-09	2.41851e-08
1112	FOXN3	-0.57431	-0.817544	-0.331077	3.69639e-06	1.36861e-05
1113	CHGA	0.125264	-0.457701	0.70823	0.673648	0.733013
1114	CHGB	0.810715	0.559249	1.06218	2.63538e-10	1.93485e-09
1116	CHI3L1	0.337952	0.151567	0.524337	0.000379727	0.000938416
1117	CHI3L2	-1.81006	-2.83162	-0.7885	0.000515096	0.00124049
1118	CHIT1	-0.382214	-0.64842	-0.116008	0.00489173	0.00966959
1119	CHKA	-0.99154	-1.40686	-0.576224	2.87876e-06	1.08621e-05
1120	CHKB	-0.573205	-1.17559	0.0291802	0.0621784	0.0948281
1121	CHM	-0.279311	-0.662116	0.103494	0.152696	0.209092
1122	CHML	0.855523	0.5412	1.16985	9.57456e-08	4.63045e-07
1123	CHN1	-0.657465	-0.934023	-0.380908	3.17051e-06	1.18815e-05
1124	CHN2	-1.06174	-1.48684	-0.636644	9.81637e-07	4.01226e-06
1128	CHRM1	-1.56027	-2.32941	-0.791137	7.00851e-05	0.000202083
1129	CHRM2	-0.475958	-2.01444	1.06253	0.544282	0.614837
1130	LYST	-1.19102	-1.83361	-0.548439	0.000280395	0.000713129
1131	CHRM3	1.421	1.13049	1.7115	9.05399e-22	2.37835e-20
1132	CHRM4	-0.00388859	-0.356721	0.348943	0.982766	0.986783
1133	CHRM5	-0.0876061	-0.595303	0.420091	0.73521	0.787203
1134	CHRNA1	0.109302	-0.0773076	0.295912	0.250968	0.320782
1135	CHRNA2	-0.545837	-1.67527	0.5836	0.343529	0.417834
1136	CHRNA3	0.324097	0.150771	0.497424	0.000247457	0.000635545
1137	CHRNA4	0.38171	0.0240093	0.73941	0.0364815	0.0591458
1138	CHRNA5	1.95039	1.40199	2.49878	3.15361e-12	3.053e-11
1139	CHRNA7	0.356348	-0.670113	1.38281	0.496236	0.570235
1140	CHRNB1	-0.0225679	-0.465687	0.420551	0.920487	0.939484
1141	CHRNB2	0.49729	0.00274433	0.991835	0.0487422	0.0766523
1142	CHRNB3	0.00575271	-0.183307	0.194812	0.952444	0.963572
1143	CHRNB4	1.04703	0.29717	1.79689	0.00620589	0.0120137
1144	CHRND	-0.149182	-0.514719	0.216354	0.423769	0.498949
1145	CHRNE	0.240549	-0.0745469	0.555645	0.134584	0.187121
1146	CHRNG	0.552552	0.172243	0.93286	0.00440447	0.0087705
1147	CHUK	-0.076233	-0.316093	0.163627	0.533336	0.604904
1149	CIDEA	0.65894	0.460969	0.85691	6.86014e-11	5.49112e-10
1152	CKB	-0.922236	-1.16891	-0.675566	2.33958e-13	2.59653e-12
1153	CIRBP	-1.44291	-2.2474	-0.638431	0.000439129	0.00107216
1154	CISH	-1.7733	-2.7435	-0.803105	0.000340483	0.000849772
1155	TBCB	0.81932	0.505054	1.13359	3.22499e-07	1.43283e-06
1158	CKM	-0.0255856	-0.545585	0.494414	0.923174	0.94135
1159	CKMT1B	1.69349	0.132862	3.25412	0.0334348	0.0547002
1160	CKMT2	-0.469827	-1.22416	0.284509	0.222186	0.288968
1161	ERCC8	0.459874	-0.138249	1.058	0.131826	0.183835
1163	CKS1B	2.8008	2.1231	3.47851	5.49152e-16	8.21217e-15
1164	CKS2	2.18219	1.88325	2.48113	1.97312e-46	3.202e-44
1173	AP2M1	2.03409	1.30378	2.7644	4.78869e-08	2.42849e-07
1174	AP1S1	1.42448	0.953646	1.89532	3.03442e-09	1.86422e-08
1175	AP2S1	1.25104	1.06686	1.43522	1.93959e-40	2.23645e-38
1176	AP3S1	0.72491	0.49777	0.952051	3.9715e-10	2.8369e-09
1178	CLC	-0.650472	-1.00294	-0.298009	0.000297902	0.00075337
1179	CLCA1	0.0657834	-0.173232	0.304799	0.589587	0.657236
1180	CLCN1	0.800689	0.367981	1.2334	0.000287018	0.00072845
1181	CLCN2	2.02848	1.58578	2.47117	2.69004e-19	5.59141e-18
1182	CLCN3	0.164421	-0.138205	0.467047	0.286933	0.35933
1183	CLCN4	-1.38976	-1.8951	-0.884421	7.03787e-08	3.47109e-07
1184	CLCN5	0.269641	0.00312015	0.536163	0.0473776	0.0746886
1185	CLCN6	-1.58575	-2.00585	-1.16564	1.38027e-13	1.57988e-12
1186	CLCN7	0.0837451	-0.210052	0.377542	0.576383	0.645111
1187	CLCNKA	-0.110393	-0.819975	0.599189	0.760427	0.808087
1188	CLCNKB	0.182163	-0.863	1.22733	0.732648	0.784921
1191	CLU	-1.66627	-1.92661	-1.40593	4.26594e-36	3.54008e-34
1192	CLIC1	-0.210116	-0.47945	0.0592171	0.126256	0.176923
1193	CLIC2	-1.99854	-2.92363	-1.07346	2.29263e-05	7.27717e-05
1195	CLK1	-0.941618	-1.53378	-0.349455	0.00182946	0.00396477
1196	CLK2	0.774159	0.301433	1.24689	0.00132858	0.00296039
1197	CLK2P1	1.17731	0.613936	1.74068	4.20641e-05	0.000126689
1198	CLK3	-0.0169514	-0.196257	0.162354	0.852999	0.884909
1200	TPP1	-1.16446	-1.53548	-0.793454	7.67055e-10	5.2156e-09
1201	CLN3	-0.793447	-1.03833	-0.548567	2.14499e-10	1.59242e-09
1203	CLN5	-1.27032	-1.45446	-1.08619	1.16594e-41	1.45133e-39
1207	CLNS1A	1.41247	0.357086	2.46786	0.00871309	0.0163612
1208	CLPS	0.108688	-0.226095	0.44347	0.524577	0.596733
1209	CLPTM1	0.669342	0.250195	1.08849	0.0017487	0.00380575
1211	CLTA	0.521757	0.30226	0.741253	3.17807e-06	1.19038e-05
1212	CLTB	0.370276	0.0536222	0.68693	0.0219135	0.0374857
1213	CLTC	0.688017	0.274314	1.10172	0.00111588	0.00252314
1215	CMA1	-0.875603	-1.49936	-0.251842	0.00593601	0.0115371
1230	CCR1	-1.13853	-2.02422	-0.252834	0.0117533	0.0214326
1232	CCR3	-0.324759	-0.653497	0.00397899	0.0528382	0.0822144
1233	CCR4	-0.186083	-0.628931	0.256765	0.410184	0.485432
1234	CCR5	-0.664983	-0.980672	-0.349293	3.65043e-05	0.000111229
1235	CCR6	-0.359729	-0.650546	-0.068911	0.0153342	0.0272061
1236	CCR7	-0.0735472	-0.410035	0.262941	0.668363	0.72841
1237	CCR8	0.559002	0.370725	0.74728	5.91306e-09	3.48328e-08
1238	ACKR2	0.162498	-0.286957	0.611953	0.478564	0.553061
1240	CMKLR1	-1.07034	-1.45007	-0.690614	3.30319e-08	1.72753e-07
1241	LTB4R	1.02624	0.59277	1.45972	3.48089e-06	1.29472e-05
1244	ABCC2	0.531487	0.353067	0.709907	5.26872e-09	3.1205e-08
1258	CNGB1	0.35895	-0.164197	0.882096	0.178689	0.239344
1259	CNGA1	0.360203	-0.0374793	0.757886	0.0758568	0.113045
1260	CNGA2	0.192843	-0.0775998	0.463285	0.162239	0.220015
1261	CNGA3	-0.198922	-0.700072	0.302227	0.436586	0.511674
1262	CNGA4	-0.976905	-1.66059	-0.293224	0.00510123	0.0100483
1263	PLK3	-1.38906	-1.97291	-0.805207	3.11621e-06	1.16981e-05
1264	CNN1	-1.32457	-2.18449	-0.464653	0.00253595	0.0053155
1265	CNN2	0.0550638	-0.432927	0.543055	0.82497	0.861912
1266	CNN3	-0.883489	-1.4546	-0.312379	0.00242937	0.00511019
1267	CNP	1.60704	1.16045	2.05363	1.75255e-12	1.75159e-11
1268	CNR1	-1.21408	-1.93321	-0.494947	0.000936558	0.00214625
1269	CNR2	0.0284236	-0.42173	0.478577	0.901508	0.924637
1271	CNTFR	-0.294121	-0.693909	0.105668	0.149323	0.204973
1272	CNTN1	0.627011	0.297735	0.956287	0.000189823	0.000499477
1277	COL1A1	2.07967	1.54993	2.6094	1.41978e-14	1.83724e-13
1278	COL1A2	1.4462	0.915665	1.97673	9.15511e-08	4.44034e-07
1280	COL2A1	0.706355	0.517508	0.895203	2.28552e-13	2.54298e-12
1281	COL3A1	1.69058	1.3527	2.02847	1.05481e-22	2.96645e-21
1282	COL4A1	0.126234	-0.202585	0.455053	0.451791	0.526844
1284	COL4A2	-0.202996	-0.615641	0.209648	0.334953	0.409267
1285	COL4A3	-2.69548	-3.63258	-1.75838	1.7238e-08	9.48629e-08
1286	COL4A4	-2.40336	-3.35993	-1.44679	8.46389e-07	3.49664e-06
1287	COL4A5	0.838581	0.344426	1.33274	0.000880829	0.0020268
1288	COL4A6	1.14226	0.820858	1.46367	3.26957e-12	3.16107e-11
1289	COL5A1	1.27618	0.775691	1.77666	5.80272e-07	2.46655e-06
1290	COL5A2	1.83146	1.41807	2.24484	3.84134e-18	7.24236e-17
1291	COL6A1	0.000847974	-0.369128	0.370824	0.996416	0.997235
1292	COL6A2	0.031603	-0.198904	0.26211	0.788149	0.831372
1293	COL6A3	0.653849	0.299078	1.00862	0.000303549	0.00076597
1294	COL7A1	2.71196	1.87841	3.54551	1.80921e-10	1.35647e-09
1295	COL8A1	-0.44692	-0.956146	0.0623057	0.0854043	0.125456
1296	COL8A2	0.150467	-0.11892	0.419853	0.27363	0.345117
1297	COL9A1	0.57677	0.311052	0.842488	2.09686e-05	6.71018e-05
1298	COL9A2	0.240953	-0.0773163	0.559223	0.137852	0.191156
1299	COL9A3	1.1658	0.969452	1.36214	2.66149e-31	1.53847e-29
1300	COL10A1	2.35424	1.91087	2.79761	2.29789e-25	8.13283e-24
1301	COL11A1	2.80796	2.0715	3.54442	7.84535e-14	9.27555e-13
1302	COL11A2	0.521573	0.00150312	1.04164	0.0493415	0.0774281
1303	COL12A1	0.840164	0.375599	1.30473	0.000393231	0.000968619
1305	COL13A1	-1.75134	-2.49456	-1.00812	3.86527e-06	1.42584e-05
1306	COL15A1	0.454441	0.162048	0.746835	0.00231757	0.00489713
1307	COL16A1	0.623697	0.283699	0.963695	0.000323908	0.000812384
1308	COL17A1	2.12288	1.52203	2.72372	4.36443e-12	4.1699e-11
1310	COL19A1	0.16054	-0.344558	0.665637	0.533315	0.604904
1311	COMP	0.517994	0.217654	0.818335	0.000723985	0.00169343
1312	COMT	-0.240476	-0.413544	-0.0674075	0.00646254	0.0124697
1314	COPA	0.848932	0.595438	1.10243	5.2466e-11	4.27613e-10
1315	COPB1	0.511652	0.325776	0.697528	6.84818e-08	3.3821e-07
1316	KLF6	-2.28044	-3.02353	-1.53734	1.80125e-09	1.14782e-08
1317	SLC31A1	-0.121235	-0.512907	0.270437	0.544069	0.614754
1318	SLC31A2	-1.61179	-2.30203	-0.921545	4.72331e-06	1.71665e-05
1325	CORT	0.579876	0.195545	0.964207	0.00310465	0.00638654
1326	MAP3K8	-1.91671	-2.56707	-1.26635	7.63641e-09	4.4341e-08
1327	COX4I1	0.402461	-0.0805917	0.885514	0.102476	0.147139
1329	COX5B	1.34429	0.924831	1.76374	3.35606e-10	2.41777e-09
1337	COX6A1	0.994425	0.445689	1.54316	0.000382504	0.000944854
1338	COX6A1P1	0.573232	0.0934979	1.05297	0.0191832	0.0332804
1339	COX6A2	0.254193	-0.17766	0.686046	0.248642	0.318127
1340	COX6B1	1.33238	0.863388	1.80136	2.57407e-08	1.37142e-07
1345	COX6C	1.28954	0.851534	1.72754	7.9086e-09	4.57751e-08
1346	COX7A1	-2.89961	-3.724	-2.07522	5.43544e-12	5.13053e-11
1347	COX7A2	0.957111	0.652965	1.26126	6.92538e-10	4.74871e-09
1348	COX7A2P2	0.776696	0.280289	1.2731	0.00216487	0.00460913
1349	COX7B	1.26726	0.91397	1.62056	2.0597e-12	2.04273e-11
1350	COX7C	-0.328863	-0.622884	-0.0348424	0.0283632	0.0472174
1351	COX8A	1.05839	0.642707	1.47408	6.02782e-07	2.55431e-06
1352	COX10	0.998492	0.649192	1.34779	2.11096e-08	1.14331e-07
1353	COX11	-0.0697989	-0.375298	0.2357	0.654295	0.71584
1355	COX15	0.514424	0.179007	0.849841	0.0026474	0.00553058
1356	CP	0.377915	0.0306375	0.725192	0.0329349	0.053971
1357	CPA1	-0.000389121	-0.767476	0.766698	0.999207	0.999435
1358	CPA2	0.397944	0.120675	0.675214	0.00490835	0.0096998
1359	CPA3	-1.63446	-2.08912	-1.17981	1.84126e-12	1.83606e-11
1360	CPB1	-0.31361	-0.567007	-0.0602121	0.0152794	0.0271375
1361	CPB2	-3.01375	-4.51968	-1.50782	8.76744e-05	0.000248226
1362	CPD	0.542025	0.183219	0.900832	0.00306853	0.00632234
1363	CPE	-0.36085	-0.640083	-0.0816159	0.0113145	0.02071
1364	CLDN4	0.243944	0.0709225	0.416965	0.00572089	0.0111556
1365	CLDN3	-0.947971	-1.44919	-0.446747	0.000209806	0.000547128
1366	CLDN7	-0.377698	-0.551568	-0.203827	2.06625e-05	6.62384e-05
1368	CPM	-2.66658	-3.54083	-1.79234	2.25635e-09	1.41924e-08
1369	CPN1	-0.0317576	-0.409481	0.345966	0.869112	0.897925
1370	CPN2	0.288331	-0.134571	0.711233	0.181455	0.242605
1371	CPOX	1.81351	0.974729	2.65229	2.25929e-05	7.17966e-05
1373	CPS1	-0.146207	-0.505092	0.212678	0.424596	0.499788
1374	CPT1A	0.0977691	-0.239521	0.435059	0.569948	0.638757
1375	CPT1B	0.915145	0.0350286	1.79526	0.0415529	0.0664773
1376	CPT2	-0.120147	-0.646786	0.406492	0.654771	0.716197
1378	CR1	-0.732944	-1.15814	-0.307749	0.000728691	0.00170355
1379	CR1L	-0.145944	-0.436925	0.145037	0.325589	0.39972
1380	CR2	0.334952	0.131583	0.538321	0.00124619	0.00279242
1381	CRABP1	0.908757	0.566453	1.25106	1.95721e-07	8.97418e-07
1382	CRABP2	1.76246	1.08539	2.43954	3.36313e-07	1.48908e-06
1384	CRAT	0.124049	-0.154654	0.402751	0.383007	0.458566
1385	CREB1	-0.215743	-0.600211	0.168726	0.271408	0.342749
1386	ATF2	0.19942	0.0267229	0.372117	0.0236205	0.0401395
1387	CREBBP	-0.201527	-0.538403	0.135349	0.240999	0.309629
1388	ATF6B	0.166386	-0.16415	0.496923	0.323833	0.398122
1389	CREBL2	-1.94949	-2.30843	-1.59054	1.8409e-26	7.24065e-25
1390	CREM	-0.659518	-1.03631	-0.28273	0.000602112	0.00143101
1392	CRH	0.0276435	-0.599226	0.654513	0.931125	0.94734
1393	CRHBP	-0.0932643	-0.623271	0.436742	0.730176	0.782847
1394	CRHR1	0.161665	-0.888977	1.21231	0.762969	0.810273
1395	CRHR2	0.145897	-0.0406476	0.332442	0.125302	0.175755
1396	CRIP1	-2.68344	-3.1207	-2.24618	2.52594e-33	1.75121e-31
1397	CRIP2	-2.1375	-2.39116	-1.88385	2.81242e-61	9.33552e-59
1398	CRK	-0.852952	-1.22352	-0.482388	6.44076e-06	2.28422e-05
1399	CRKL	1.44093	0.909724	1.97214	1.0577e-07	5.07048e-07
1400	CRMP1	0.297413	-0.00332401	0.598149	0.0525865	0.0819101
1401	CRP	0.156751	-0.21596	0.529463	0.409768	0.485044
1404	HAPLN1	0.483486	0.308861	0.658111	5.74483e-08	2.87872e-07
1406	CRX	0.121665	-0.0565779	0.299909	0.180951	0.242019
1407	CRY1	-1.2132	-1.69358	-0.732824	7.4242e-07	3.09808e-06
1408	CRY2	-2.58193	-3.58555	-1.57832	4.60004e-07	1.99047e-06
1410	CRYAB	-0.135684	-0.582049	0.310681	0.551321	0.621218
1411	CRYBA1	0.312026	-0.101559	0.72561	0.139226	0.192816
1412	CRYBA2	0.495573	0.258547	0.732599	4.16944e-05	0.000125645
1413	CRYBA4	0.338462	0.0880126	0.588911	0.00807943	0.0152669
1414	CRYBB1	0.0581191	-0.337528	0.453766	0.773414	0.819148
1415	CRYBB2	0.1866	0.00722195	0.365978	0.0414626	0.0663474
1416	CRYBB2P1	0.560702	0.31795	0.803455	5.98084e-06	2.13328e-05
1417	CRYBB3	0.63406	0.219352	1.04877	0.00272962	0.00568986
1418	CRYGA	0.462014	0.233376	0.690652	7.47787e-05	0.000214571
1419	CRYGB	-0.0531754	-0.408817	0.302466	0.769482	0.816121
1420	CRYGC	0.302576	0.0417448	0.563408	0.0229873	0.0391575
1421	CRYGD	-0.0607754	-0.591333	0.469782	0.822357	0.859593
1427	CRYGS	0.40013	-0.0240141	0.824275	0.0644585	0.097815
1428	CRYM	-1.81789	-2.56521	-1.07057	1.86357e-06	7.26331e-06
1429	CRYZ	-0.71424	-1.2219	-0.206576	0.00582443	0.0113383
1431	CS	1.15109	0.844975	1.45721	1.7054e-13	1.92191e-12
1432	MAPK14	0.270678	-0.379111	0.920466	0.414244	0.489311
1434	CSE1L	3.01639	2.15452	3.87827	6.90944e-12	6.41951e-11
1435	CSF1	-0.992778	-1.5282	-0.457357	0.000278884	0.000709451
1436	CSF1R	-0.616987	-1.14087	-0.0930989	0.0209844	0.0360627
1437	CSF2	-0.728736	-1.1319	-0.325574	0.000395996	0.000975102
1438	CSF2RA	-1.24997	-2.18094	-0.318995	0.00849989	0.0159993
1439	CSF2RB	-1.36677	-1.76179	-0.971759	1.18851e-11	1.07516e-10
1440	CSF3	-1.31468	-1.69643	-0.932925	1.48143e-11	1.31985e-10
1441	CSF3R	-2.37357	-3.31	-1.43714	6.76691e-07	2.84493e-06
1442	CSH1	-0.235887	-0.966968	0.495195	0.527131	0.599138
1443	CSH2	0.201086	-0.212956	0.615127	0.341154	0.415522
1444	CSHL1	0.534576	0.18308	0.886073	0.00287473	0.00595814
1445	CSK	0.413317	-0.766855	1.59349	0.492452	0.566422
1446	CSN1S1	0.0707476	-0.238503	0.379998	0.653877	0.715505
1447	CSN2	0.274633	0.0874765	0.461789	0.00402689	0.00808478
1448	CSN3	-0.0601558	-0.412391	0.292079	0.737829	0.789449
1452	CSNK1A1	0.779796	0.522201	1.03739	2.97036e-09	1.82794e-08
1453	CSNK1D	-0.374963	-1.18112	0.431194	0.361966	0.437152
1454	CSNK1E	0.710804	-0.0869102	1.50852	0.0807366	0.119375
1455	CSNK1G2	0.718601	0.179193	1.25801	0.00902589	0.0168831
1456	CSNK1G3	0.637939	0.251058	1.02482	0.00122996	0.00275972
1457	CSNK2A1	2.65336	1.74782	3.55889	9.30273e-09	5.31848e-08
1459	CSNK2A2	0.30929	-0.114749	0.733329	0.152838	0.209234
1460	CSNK2B	0.78279	0.386524	1.17906	0.000108059	0.000299898
1462	VCAN	0.860117	0.623427	1.09681	1.06077e-12	1.09156e-11
1463	NCAN	0.598411	0.385374	0.811449	3.68233e-08	1.90625e-07
1464	CSPG4	-0.665483	-1.21134	-0.119622	0.0168724	0.0296637
1465	CSRP1	-2.39832	-3.12916	-1.66748	1.26097e-10	9.64233e-10
1466	CSRP2	0.939126	0.574775	1.30348	4.37499e-07	1.89985e-06
1468	SLC25A10	2.19081	1.6332	2.74841	1.35377e-14	1.75806e-13
1469	CST1	1.26829	0.315695	2.22089	0.0090674	0.0169437
1470	CST2	0.914881	0.334861	1.4949	0.00199146	0.00427944
1471	CST3	-1.55956	-2.04735	-1.07177	3.69552e-10	2.64927e-09
1472	CST4	0.535277	-0.0431815	1.11374	0.069731	0.104965
1473	CST5	-1.68803	-2.71602	-0.660051	0.00128897	0.00288121
1474	CST6	-1.41905	-2.31019	-0.527907	0.00180218	0.00391105
1475	CSTA	1.99498	1.17248	2.81748	1.99533e-06	7.73285e-06
1476	CSTB	0.968202	0.765848	1.17056	6.73281e-21	1.62091e-19
1477	CSTF1	1.05211	0.562668	1.54155	2.51809e-05	7.93188e-05
1478	CSTF2	1.98512	1.41704	2.5532	7.43774e-12	6.88407e-11
1479	CSTF3	1.34382	0.9878	1.69985	1.38325e-13	1.58247e-12
1482	NKX2-5	1.08688	0.824274	1.34948	4.97804e-16	7.48003e-15
1485	CTAG1B	-0.340446	-2.42362	1.74273	0.748734	0.798599
1486	CTBS	-0.500309	-0.825784	-0.174834	0.00258859	0.00541858
1487	CTBP1	-0.268519	-0.490031	-0.0470072	0.0175067	0.0306805
1488	CTBP2	-0.560529	-0.911216	-0.209841	0.00173179	0.00377138
1489	CTF1	-0.785262	-1.06983	-0.500698	6.35321e-08	3.154e-07
1490	CTGF	-1.37497	-1.62092	-1.12903	6.13549e-28	2.7488e-26
1491	CTH	-0.428513	-1.25643	0.399401	0.310372	0.384009
1493	CTLA4	0.409392	0.0376886	0.781094	0.0308739	0.0509097
1495	CTNNA1	-1.10861	-1.63601	-0.581206	3.7909e-05	0.000115205
1496	CTNNA2	0.0278436	-0.229154	0.284841	0.831837	0.86757
1497	CTNS	-1.05007	-1.23028	-0.869861	3.29481e-30	1.76486e-28
1498	CTNNA1P1	0.458719	0.175189	0.742249	0.00151916	0.00334256
1499	CTNNB1	-0.390278	-0.579049	-0.201507	5.07467e-05	0.000150421
1500	CTNND1	0.379248	0.126356	0.632141	0.00329012	0.00672577
1501	CTNND2	-1.13543	-1.60688	-0.663983	2.35441e-06	8.99867e-06
1503	CTPS1	2.02022	1.4186	2.62185	4.65804e-11	3.83209e-10
1504	CTRB1	0.0714353	-0.198719	0.34159	0.604275	0.670735
1506	CTRL	-0.275398	-0.618911	0.0681157	0.116108	0.164173
1508	CTSB	0.198551	-0.165319	0.562422	0.284852	0.357194
1509	CTSD	-1.1523	-1.59711	-0.707498	3.82553e-07	1.67754e-06
1510	CTSE	-1.05681	-1.37349	-0.740127	6.12392e-11	4.94154e-10
1511	CTSG	-1.08335	-1.58496	-0.581748	2.30515e-05	7.31371e-05
1512	CTSH	-2.10254	-2.76186	-1.44322	4.09763e-10	2.92127e-09
1513	CTSK	0.783785	0.506266	1.0613	3.10455e-08	1.62948e-07
1514	CTSL	-0.770003	-1.22204	-0.317964	0.00084201	0.00194422
1515	CTSV	2.62806	1.62514	3.63098	2.80802e-07	1.25701e-06
1519	CTSO	-2.50808	-2.96482	-2.05134	5.16571e-27	2.1193e-25
1520	CTSS	-1.56818	-1.93123	-1.20513	2.54057e-17	4.32446e-16
1521	CTSW	-1.7574	-2.35028	-1.16452	6.25879e-09	3.67115e-08
1522	CTSZ	-0.949622	-1.35884	-0.540403	5.40977e-06	1.94354e-05
1523	CUX1	0.303276	-0.117763	0.724316	0.158018	0.215263
1524	CX3CR1	-2.45505	-3.11333	-1.79678	2.67674e-13	2.95839e-12
1525	CXADR	0.880987	0.703072	1.0589	2.86538e-22	7.80782e-21
1527	TEX28	0.198028	-0.165918	0.561974	0.286224	0.358588
1528	CYB5A	-2.52448	-3.27926	-1.76971	5.54744e-11	4.4979e-10
1532	CYB5AP4	-2.17593	-2.51734	-1.83453	8.26925e-36	6.68497e-34
1534	CYB561	-0.323176	-0.522607	-0.123746	0.00149264	0.00329047
1535	CYBA	-0.556613	-1.07547	-0.0377542	0.0355026	0.0577425
1536	CYBB	-1.1941	-1.78536	-0.602849	7.54649e-05	0.000216314
1537	CYC1	1.95176	1.47467	2.42886	1.07401e-15	1.55617e-14
1538	CYLC1	0.346705	0.062005	0.631406	0.0169946	0.0298499
1539	CYLC2	0.0782755	-0.0945255	0.251077	0.374634	0.450293
1540	CYLD	-1.4181	-2.14024	-0.695968	0.000118646	0.000326626
1543	CYP1A1	-0.411844	-0.7526	-0.0710877	0.0178436	0.0311986
1544	CYP1A2	-0.92196	-2.28208	0.438155	0.18399	0.245619
1545	CYP1B1	-0.0953067	-0.449136	0.258523	0.597547	0.664352
1548	CYP2A6	-0.473002	-1.09817	0.152165	0.138098	0.191412
1549	CYP2A7	0.102691	-0.512267	0.717648	0.743448	0.794045
1550	CYP2A7P1	0.505015	0.220606	0.789423	0.000500969	0.00120926
1551	CYP3A7	-1.47921	-2.28554	-0.67288	0.000323711	0.000811982
1553	CYP2A13	-0.0236946	-0.376983	0.329593	0.895417	0.919595
1555	CYP2B6	-0.239358	-0.803947	0.32523	0.406013	0.481166
1556	CYP2B7P	-2.61478	-4.89401	-0.335555	0.0245433	0.0415401
1557	CYP2C19	0.225581	-0.0868375	0.538	0.157014	0.214148
1558	CYP2C8	-0.478601	-0.738643	-0.21856	0.000309428	0.000779189
1559	CYP2C9	0.480543	0.0126924	0.948394	0.0441003	0.0701023
1562	CYP2C18	0.874315	0.450881	1.29775	5.18846e-05	0.000153503
1564	CYP2D7	0.930756	0.0927305	1.76878	0.0294924	0.0488523
1565	CYP2D6	0.692692	-0.0428715	1.42826	0.0649315	0.0984442
1571	CYP2E1	0.303525	0.0603212	0.546729	0.0144416	0.0258063
1572	CYP2F1	-1.37211	-1.65566	-1.08855	2.44099e-21	6.13976e-20
1573	CYP2J2	0.041513	-0.407398	0.490424	0.856173	0.887152
1576	CYP3A4	0.18582	-0.33235	0.703991	0.482143	0.556229
1577	CYP3A5	-1.2646	-1.6851	-0.844098	3.76256e-09	2.2796e-08
1579	CYP4A11	-0.309085	-0.768804	0.150634	0.187587	0.249675
1580	CYP4B1	-2.80857	-3.54086	-2.07628	5.59999e-14	6.76475e-13
1581	CYP7A1	-0.55604	-1.17605	0.0639655	0.078789	0.116882
1582	CYP8B1	-0.0899901	-0.530216	0.350236	0.688676	0.745947
1583	CYP11A1	-0.0441213	-0.383822	0.295579	0.799058	0.840452
1584	CYP11B1	0.34707	-0.010261	0.7044	0.0569516	0.0878658
1585	CYP11B2	0.325374	0.0146172	0.636131	0.0401546	0.0644757
1586	CYP17A1	-0.469355	-1.64071	0.701999	0.43225	0.507529
1587	ADAM3A	0.12888	-0.0652207	0.32298	0.193126	0.255882
1588	CYP19A1	0.418679	0.168976	0.668383	0.00101519	0.00231025
1589	CYP21A2	-0.489755	-1.57719	0.597678	0.377386	0.453177
1591	CYP24A1	1.00624	0.601203	1.41127	1.12059e-06	4.54122e-06
1592	CYP26A1	1.08971	0.747856	1.43156	4.16564e-10	2.96783e-09
1593	CYP27A1	-2.26708	-3.06435	-1.46982	2.49972e-08	1.3344e-07
1594	CYP27B1	1.17803	0.657249	1.69881	9.27062e-06	3.18739e-05
1595	CYP51A1	-0.52696	-0.963125	-0.0907953	0.0178863	0.0312681
1600	DAB1	0.288772	-0.121312	0.698856	0.167537	0.226372
1601	DAB2	-1.6887	-2.29507	-1.08232	4.80632e-08	2.43517e-07
1602	DACH1	-1.95644	-2.78588	-1.12701	3.78026e-06	1.39706e-05
1603	DAD1	0.167396	-0.00534742	0.340139	0.0575261	0.0886187
1604	CD55	-3.01148	-3.94646	-2.0765	2.73913e-10	2.00296e-09
1605	DAG1	-0.352213	-0.707897	0.00347176	0.0522785	0.0814883
1606	DGKA	1.99763	1.3415	2.65376	2.41308e-09	1.50873e-08
1607	DGKB	0.372681	-0.0312237	0.776586	0.0705366	0.106027
1608	DGKG	0.564107	0.156817	0.971397	0.00663561	0.0127722
1609	DGKQ	0.0469298	-0.154953	0.248813	0.648668	0.710871
1610	DAO	-0.353408	-1.17683	0.470018	0.400235	0.475688
1611	DAP	0.393058	0.111987	0.674128	0.00612757	0.0118789
1612	DAPK1	-2.5732	-3.45596	-1.69043	1.10901e-08	6.26354e-08
1613	DAPK3	-0.101684	-0.332025	0.128656	0.386911	0.462436
1615	DARS	1.86689	1.43815	2.29562	1.40752e-17	2.47877e-16
1616	DAXX	0.871659	0.602187	1.14113	2.29962e-10	1.70088e-09
1618	DAZL	0.445512	-0.0128622	0.903886	0.0567844	0.0876265
1620	BRINP1	-0.339923	-0.672845	-0.00700104	0.045373	0.071849
1621	DBH	-0.593422	-0.998923	-0.18792	0.00412735	0.00826904
1622	DBI	0.437733	0.108206	0.76726	0.00922638	0.0172261
1627	DBN1	0.952406	0.457126	1.44769	0.000163941	0.00043747
1628	DBP	0.654437	-0.0972513	1.40612	0.0879356	0.128785
1629	DBT	0.30734	0.0374784	0.577201	0.0256041	0.0431289
1630	DCC	-0.405635	-0.804733	-0.00653707	0.0463637	0.0732536
1632	ECI1	0.301316	-0.00691601	0.609547	0.0553668	0.085656
1633	DCK	0.755716	0.578737	0.932695	5.80034e-17	9.51152e-16
1634	DCN	-1.24948	-1.66204	-0.836926	2.92057e-09	1.79882e-08
1635	DCTD	0.0156956	-0.157027	0.188418	0.858641	0.889119
1636	ACE	-2.59872	-3.29613	-1.90132	2.8065e-13	3.09451e-12
1638	DCT	-0.217233	-0.639829	0.205362	0.313689	0.387281
1639	DCTN1	-0.0790317	-0.288378	0.130315	0.45935	0.533983
1641	DCX	0.178677	-0.200619	0.557972	0.355856	0.430842
1642	DDB1	0.990183	0.336371	1.64399	0.00299433	0.00618224
1643	DDB2	0.479899	0.194935	0.764863	0.000964402	0.00220429
1644	DDC	-0.745464	-1.20154	-0.289389	0.00135721	0.00301896
1645	AKR1C1	1.38022	0.993239	1.76721	2.74076e-12	2.67459e-11
1646	AKR1C2	1.91807	1.36747	2.46867	8.62621e-12	7.92714e-11
1647	GADD45A	0.40701	0.0342197	0.7798	0.0323648	0.0531003
1649	DDIT3	1.13033	0.630025	1.63063	9.50566e-06	3.26155e-05
1650	DDOST	1.16338	0.717155	1.6096	3.22211e-07	1.43184e-06
1652	DDT	1.28685	1.10193	1.47177	2.33807e-42	3.01309e-40
1653	DDX1	1.39211	0.970553	1.81367	9.64606e-11	7.52317e-10
1654	DDX3X	0.0169717	-0.475091	0.509034	0.946103	0.958529
1655	DDX5	-1.38203	-2.13098	-0.633077	0.00029839	0.000754343
1656	DDX6	0.146623	-0.0261786	0.319425	0.0963046	0.139438
1657	DMXL1	-1.46123	-2.12924	-0.793224	1.80847e-05	5.87135e-05
1659	DHX8	1.11071	0.682338	1.53909	3.73685e-07	1.64062e-06
1660	DHX9	1.27931	0.773044	1.78557	7.31675e-07	3.05732e-06
1661	DHX9P1	0.986579	0.691906	1.28125	5.30718e-11	4.32069e-10
1662	DDX10	1.63804	1.43326	1.84283	2.16007e-55	5.2581e-53
1663	DDX11	1.68444	1.18517	2.18372	3.77921e-11	3.16737e-10
1665	DHX15	0.364804	-0.0617583	0.791367	0.0936994	0.136143
1666	DECR1	-0.814821	-1.12378	-0.505861	2.35317e-07	1.06471e-06
1669	DEFA4	-0.814866	-1.36674	-0.262989	0.00380421	0.0076764
1670	DEFA5	0.23315	0.0365221	0.429778	0.0201249	0.0347354
1671	DEFA6	0.183837	-0.128198	0.495873	0.248204	0.317676
1672	DEFB1	0.540626	0.331097	0.750156	4.25732e-07	1.85205e-06
1673	DEFB4A	0.546885	0.274581	0.819189	8.27419e-05	0.000235478
1674	DES	-2.79334	-3.69803	-1.88866	1.43323e-09	9.27052e-09
1675	CFD	-3.05766	-3.8695	-2.24582	1.56061e-13	1.77426e-12
1676	DFFA	0.610531	0.0967329	1.12433	0.0198608	0.0343121
1677	DFFB	-0.00628783	-0.422339	0.409763	0.976369	0.981792
1678	TIMM8A	1.73935	0.819469	2.65923	0.000210571	0.000548667
1687	DFNA5	0.784658	0.30955	1.25977	0.00120814	0.00271411
1690	COCH	1.24388	0.579505	1.90826	0.000242979	0.000625081
1716	DGUOK	1.94358	1.43399	2.45317	7.70133e-14	9.12497e-13
1717	DHCR7	1.30782	1.00474	1.61091	2.73626e-17	4.63261e-16
1718	DHCR24	-1.57468	-1.76395	-1.38541	8.8964e-60	2.70698e-57
1719	DHFR	1.79637	1.53898	2.05375	1.35207e-42	1.76317e-40
1720	DHFRP3	0.0396228	-0.243128	0.322374	0.783581	0.827629
1723	DHODH	0.484509	0.310682	0.658336	4.6809e-08	2.37602e-07
1725	DHPS	0.106538	-0.0660011	0.279077	0.226194	0.293309
1727	CYB5R3	-1.11113	-1.46742	-0.754853	9.8066e-10	6.52423e-09
1728	NQO1	1.20462	0.826078	1.58316	4.45692e-10	3.15892e-09
1729	DIAPH1	-1.09997	-1.58258	-0.617353	7.92792e-06	2.76041e-05
1730	DIAPH2	-0.44283	-0.833098	-0.0525633	0.0261523	0.0439442
1731	SEPT1	-0.674938	-1.18193	-0.167943	0.0090753	0.0169571
1733	DIO1	-0.744049	-1.16422	-0.323881	0.000518958	0.00124883
1734	DIO2	1.74832	1.40876	2.08789	6.03742e-24	1.9004e-22
1735	DIO3	-0.227652	-0.541205	0.0859015	0.154733	0.211433
1736	DKC1	2.5214	1.62962	3.41319	2.99786e-08	1.57726e-07
1737	DLAT	0.593314	0.156402	1.03023	0.00777759	0.0147423
1738	DLD	0.763364	0.446333	1.0804	2.36657e-06	9.0401e-06
1739	DLG1	2.08067	1.68083	2.48051	1.99963e-24	6.5679e-23
1740	DLG2	-0.300685	-0.696911	0.0955406	0.136919	0.190017
1741	DLG3	0.570503	0.201496	0.939511	0.00244394	0.00513886
1742	DLG4	-0.336215	-0.836776	0.164346	0.18802	0.25013
1743	DLST	0.11377	-0.277406	0.504947	0.568652	0.637467
1744	DLSTP1	-0.297246	-1.11651	0.522017	0.477012	0.551443
1745	DLX1	1.49724	1.19755	1.79694	1.22136e-22	3.41732e-21
1746	DLX2	1.10688	0.771087	1.44266	1.04211e-10	8.07873e-10
1747	DLX3	0.865059	0.680651	1.04947	3.77826e-20	8.42914e-19
1748	DLX4	0.662795	0.0368348	1.28876	0.0379589	0.0613173
1749	DLX5	2.12269	1.4784	2.76697	1.06522e-10	8.2433e-10
1750	DLX6	1.6284	0.880466	2.37634	1.97922e-05	6.36909e-05
1755	DMBT1	-1.56814	-1.96103	-1.17525	5.16617e-15	7.03421e-14
1756	DMD	-1.35272	-1.79782	-0.907612	2.5767e-09	1.60097e-08
1757	SARDH	0.218101	-0.162671	0.598872	0.26159	0.332111
1758	DMP1	0.254288	-0.528736	1.03731	0.52445	0.596679
1759	DNM1	0.916789	0.331051	1.50253	0.00215707	0.00459469
1760	DMPK	-0.997825	-1.49505	-0.500597	8.38198e-05	0.000238205
1761	DMRT1	0.989587	0.573132	1.40604	3.20391e-06	1.19944e-05
1762	DMWD	0.0694076	-0.306838	0.445653	0.717678	0.771714
1763	DNA2	1.81638	0.758646	2.87411	0.000763437	0.00177967
1767	DNAH5	-0.920407	-1.4884	-0.352416	0.00149298	0.00329089
1768	DNAH6	-0.705739	-1.34196	-0.0695161	0.0296964	0.0491608
1769	DNAH8	0.114217	-0.469177	0.697611	0.701184	0.756987
1770	DNAH9	-0.91624	-1.43156	-0.400925	0.000492414	0.00119018
1773	DNASE1	0.766881	0.294931	1.23883	0.00144861	0.00320276
1774	DNASE1L1	-0.653218	-0.972531	-0.333905	6.08478e-05	0.000177551
1775	DNASE1L2	0.475846	0.020223	0.93147	0.0406622	0.0651667
1776	DNASE1L3	-1.60813	-2.16894	-1.04732	1.90707e-08	1.04086e-07
1777	DNASE2	0.0479745	-0.176273	0.272222	0.674993	0.734138
1778	DYNC1H1	0.42277	0.0269675	0.818573	0.0363042	0.0589019
1780	DYNC1I1	1.38612	0.872768	1.89948	1.20891e-07	5.73387e-07
1781	DYNC1I2	-0.921435	-1.72044	-0.122431	0.0238033	0.0404104
1783	DYNC1LI2	-1.19549	-1.51728	-0.873697	3.30192e-13	3.61512e-12
1785	DNM2	-0.868289	-1.32684	-0.40974	0.000206198	0.000538553
1786	DNMT1	1.65002	0.967131	2.3329	2.18245e-06	8.39562e-06
1787	TRDMT1	-1.12074	-1.38879	-0.852686	2.51284e-16	3.90158e-15
1788	DNMT3A	1.4206	1.00318	1.83802	2.55226e-11	2.20051e-10
1789	DNMT3B	1.8015	1.23031	2.37269	6.34484e-10	4.37391e-09
1791	DNTT	0.277213	-0.0469062	0.601332	0.0936755	0.136125
1793	DOCK1	-0.560934	-1.18109	0.0592269	0.0762647	0.113614
1794	DOCK2	-1.61932	-2.11179	-1.12684	1.15955e-10	8.91975e-10
1795	DOCK3	0.17663	-0.18362	0.536879	0.336568	0.41088
1796	DOK1	-1.54511	-2.20726	-0.882961	4.79562e-06	1.7406e-05
1797	DXO	0.172022	-0.171108	0.515152	0.325808	0.3999
1798	DPAGT1	0.697661	0.30445	1.09087	0.000506122	0.00122062
1800	DPEP1	0.467891	0.130135	0.805648	0.0066251	0.0127542
1801	DPH1	0.112424	-0.119844	0.344692	0.342786	0.417116
1802	DPH2	1.45598	0.854649	2.05731	2.07905e-06	8.02603e-06
1803	DPP4	-1.35333	-2.12842	-0.578239	0.000621282	0.00147242
1804	DPP6	-1.03559	-1.80475	-0.266432	0.00831791	0.0156877
1805	DPT	-1.41919	-1.70024	-1.13813	4.2986e-23	1.25565e-21
1806	DPYD	-1.53714	-1.97269	-1.10159	4.60955e-12	4.38879e-11
1807	DPYS	-0.67914	-1.0975	-0.260777	0.00146433	0.00323327
1808	DPYSL2	-3.15791	-4.39628	-1.91954	5.79257e-07	2.46367e-06
1809	DPYSL3	-0.126518	-0.44201	0.188973	0.431876	0.507185
1810	DR1	1.16155	0.607542	1.71556	3.96829e-05	0.000120146
1811	SLC26A3	-0.0657017	-0.447821	0.316417	0.736119	0.787985
1812	DRD1	-0.894208	-1.1835	-0.604917	1.37555e-09	8.92378e-09
1813	DRD2	0.251265	-0.165036	0.667566	0.236823	0.305051
1814	DRD3	0.197002	-0.21055	0.604554	0.343433	0.417764
1815	DRD4	0.805421	0.445066	1.16578	1.18312e-05	3.98093e-05
1816	DRD5	0.419939	0.158429	0.681448	0.00164753	0.00360221
1819	DRG2	0.35575	-0.0589435	0.770444	0.0926892	0.134935
1820	ARID3A	0.746737	0.464151	1.02932	2.22796e-07	1.01203e-06
1821	DRP2	0.239115	-0.384079	0.862308	0.452037	0.527048
1822	ATN1	-0.117985	-0.414822	0.178853	0.435961	0.511064
1823	DSC1	0.947491	0.642232	1.25275	1.17567e-09	7.71155e-09
1824	DSC2	1.80735	1.13917	2.47552	1.14853e-07	5.47001e-07
1825	DSC3	3.24794	2.12061	4.37527	1.63418e-08	9.02029e-08
1826	DSCAM	0.431664	-0.0375714	0.9009	0.0713833	0.107166
1827	RCAN1	-0.71291	-1.28449	-0.14133	0.0145017	0.025899
1828	DSG1	0.994113	0.618879	1.36935	2.07425e-07	9.47116e-07
1829	DSG2	2.43317	1.76961	3.09672	6.62577e-13	7.00229e-12
1830	DSG3	3.92232	2.20175	5.64289	7.89359e-06	2.74977e-05
1831	TSC22D3	-1.54549	-2.00145	-1.08953	3.06591e-11	2.60846e-10
1832	DSP	3.78432	2.61779	4.95085	2.04018e-10	1.51883e-09
1833	EPYC	0.688375	0.335217	1.04153	0.000133257	0.000362433
1834	DSPP	0.567609	0.208165	0.927053	0.00196785	0.00423495
1836	SLC26A2	-1.00549	-1.33227	-0.678701	1.63335e-09	1.04752e-08
1837	DTNA	-0.895985	-1.31234	-0.479633	2.46677e-05	7.78253e-05
1838	DTNB	0.885937	0.254571	1.5173	0.00595527	0.0115684
1839	HBEGF	-1.19261	-1.85972	-0.525497	0.000458554	0.00111573
1840	DTX1	-0.187758	-0.532503	0.156987	0.285768	0.358178
1841	DTYMK	2.57959	1.66405	3.49512	3.34515e-08	1.74656e-07
1842	ECM2	-1.82879	-2.35054	-1.30703	6.4282e-12	6.00039e-11
1843	DUSP1	-2.4063	-3.15716	-1.65545	3.35998e-10	2.41981e-09
1844	DUSP2	-0.166847	-0.607544	0.27385	0.458064	0.532855
1845	DUSP3	-0.816897	-1.48671	-0.147086	0.016832	0.0295975
1846	DUSP4	-0.709037	-0.994394	-0.423681	1.11592e-06	4.52398e-06
1847	DUSP5	-0.189781	-0.461664	0.0821032	0.171282	0.230781
1848	DUSP6	-1.6019	-2.05953	-1.14428	6.84735e-12	6.36722e-11
1849	DUSP7	0.79989	0.483871	1.11591	7.01464e-07	2.94166e-06
1850	DUSP8	-1.09358	-1.50107	-0.686084	1.44129e-07	6.74409e-07
1852	DUSP9	1.77052	0.88983	2.6512	8.13884e-05	0.000231958
1854	DUT	1.18717	0.792106	1.58224	3.86962e-09	2.33993e-08
1855	DVL1	-0.00585857	-0.265826	0.254109	0.964769	0.972879
1856	DVL2	1.02642	0.50334	1.54951	0.000120087	0.000330096
1857	DVL3	1.94237	0.787898	3.09684	0.000975168	0.0022282
1859	DYRK1A	-0.541334	-0.912302	-0.170367	0.00423534	0.00846604
1861	TOR1A	0.276935	0.0293421	0.524527	0.0283623	0.0472174
1869	E2F1	1.30291	0.701213	1.9046	2.19466e-05	6.99049e-05
1870	E2F2	1.69338	0.804406	2.58235	0.000188852	0.000497399
1871	E2F3	1.43073	1.04613	1.81533	3.07295e-13	3.37286e-12
1874	E2F4	0.866553	0.517095	1.21601	1.17308e-06	4.73557e-06
1875	E2F5	0.076554	-0.256347	0.409455	0.652196	0.714059
1876	E2F6	1.27811	0.684613	1.87161	2.43404e-05	7.68925e-05
1877	E4F1	0.309701	-0.286825	0.906226	0.308886	0.382385
1879	EBF1	-1.56443	-1.81241	-1.31644	4.07706e-35	3.17866e-33
1880	GPR183	-0.717697	-1.05458	-0.380817	2.97264e-05	9.22182e-05
1889	ECE1	0.221075	0.00994954	0.432201	0.0401376	0.0644674
1890	TYMP	0.413668	0.226048	0.601287	1.55061e-05	5.09842e-05
1891	ECH1	-0.0192276	-0.329595	0.29114	0.903357	0.925797
1892	ECHS1	0.686684	0.369967	1.0034	2.14285e-05	6.84238e-05
1893	ECM1	0.253382	-0.247656	0.754421	0.321596	0.395661
1894	ECT2	3.56426	2.4903	4.63822	7.78243e-11	6.17521e-10
1896	EDA	-0.405966	-0.764988	-0.0469441	0.0266751	0.04473
1901	S1PR1	-3.28555	-4.24906	-2.32205	2.33349e-11	2.02624e-10
1902	LPAR1	0.0623458	-0.297153	0.421845	0.733928	0.786023
1903	S1PR3	0.0314636	-0.181984	0.244911	0.772649	0.818615
1906	EDN1	-1.23672	-2.03522	-0.438228	0.00240035	0.00505255
1907	EDN2	0.684436	0.350506	1.01837	5.88904e-05	0.000172322
1908	EDN3	-0.501267	-0.99042	-0.0121135	0.0445901	0.0707525
1909	EDNRA	-1.56095	-1.86735	-1.25455	1.77115e-23	5.32267e-22
1910	EDNRB	-3.55609	-4.58047	-2.5317	1.01857e-11	9.27851e-11
1911	PHC1	-0.441878	-1.24068	0.356928	0.278276	0.34997
1912	PHC2	-0.481199	-0.95844	-0.00395894	0.0481295	0.0757705
1915	EEF1A1	-1.22485	-2.08537	-0.364337	0.00527408	0.0103618
1917	EEF1A2	0.841181	0.47543	1.20693	6.55441e-06	2.32127e-05
1933	EEF1B2	0.371287	-0.162425	0.904999	0.172729	0.232459
1936	EEF1D	0.642694	0.370169	0.91522	3.79763e-06	1.4023e-05
1937	EEF1G	0.715614	0.137348	1.29388	0.0152878	0.0271502
1938	EEF2	0.280791	0.107288	0.454294	0.00151426	0.00333211
1939	EIF2D	0.148645	-0.0306207	0.327911	0.104124	0.149173
1942	EFNA1	-0.370883	-0.748756	0.00698972	0.054391	0.0843192
1943	EFNA2	0.438042	-0.0138679	0.889951	0.057457	0.0885273
1944	EFNA3	2.0564	0.904977	3.20782	0.000464506	0.00112896
1945	EFNA4	2.67694	1.49702	3.85686	8.72117e-06	3.01172e-05
1946	EFNA5	-0.295976	-0.473892	-0.11806	0.001112	0.00251541
1947	EFNB1	0.806552	0.331462	1.28164	0.000876607	0.00201857
1948	EFNB2	-0.422107	-0.8783	0.0340865	0.0697522	0.10499
1949	EFNB3	0.527532	0.0153821	1.03968	0.0435049	0.0692613
1950	EGF	0.501437	0.17958	0.823295	0.00226169	0.00478941
1951	CELSR3	0.906769	0.412559	1.40098	0.000323012	0.000810387
1952	CELSR2	2.08096	1.13349	3.02843	1.67185e-05	5.46343e-05
1953	MEGF6	-0.831793	-1.35028	-0.313307	0.00166474	0.00363547
1954	MEGF8	0.365714	0.0321332	0.699295	0.0316532	0.0520815
1955	MEGF9	-1.02598	-1.55137	-0.500586	0.000129514	0.00035326
1956	EGFR	1.12473	0.667314	1.58215	1.44072e-06	5.73554e-06
1958	EGR1	-1.25044	-1.64031	-0.86058	3.24991e-10	2.34825e-09
1959	EGR2	-0.842596	-1.26914	-0.416055	0.000108061	0.000299898
1960	EGR3	-0.632183	-1.23711	-0.0272532	0.0405341	0.0649899
1961	EGR4	0.584806	0.290249	0.879363	9.97222e-05	0.000279316
1962	EHHADH	1.11756	0.463739	1.77137	0.000807749	0.0018736
1964	EIF1AX	-0.408867	-1.14299	0.325257	0.275012	0.346501
1965	EIF2S1	0.663034	0.401686	0.924383	6.61377e-07	2.78429e-06
1967	EIF2B1	0.45744	-0.106628	1.02151	0.111956	0.158948
1968	EIF2S3	0.558213	0.208615	0.90781	0.00175085	0.00380872
1969	EPHA2	0.0190124	-0.294369	0.332393	0.905348	0.92762
1973	EIF4A1	1.01932	0.601886	1.43676	1.70185e-06	6.69372e-06
1974	EIF4A2	0.876274	0.521906	1.23064	1.25626e-06	5.04716e-06
1975	EIF4B	0.284485	-0.279607	0.848577	0.32293	0.397168
1977	EIF4E	0.473463	0.0876611	0.859264	0.016159	0.0284919
1978	EIF4EBP1	2.35903	1.87048	2.84757	2.96418e-21	7.39627e-20
1979	EIF4EBP2	-1.48426	-1.9638	-1.00473	1.30695e-09	8.50646e-09
1981	EIF4G1	1.84771	1.20164	2.49378	2.07849e-08	1.12666e-07
1982	EIF4G2	0.509654	0.223885	0.795422	0.000473178	0.0011485
1983	EIF5	0.572368	-0.107027	1.25176	0.0986968	0.142469
1984	EIF5A	0.921797	0.301823	1.54177	0.00356672	0.00724119
1990	CELA1	-0.0688183	-0.507578	0.369942	0.758527	0.806573
1991	ELANE	-1.22836	-2.09165	-0.365059	0.00529093	0.0103912
1992	SERPINB1	-0.961285	-1.45402	-0.468553	0.000131436	0.000357924
1993	ELAVL2	0.310049	-0.000782485	0.62088	0.0505795	0.0791341
1994	ELAVL1	0.803425	0.209712	1.39714	0.00799543	0.0151238
1995	ELAVL3	0.112241	-0.38079	0.605271	0.655457	0.71684
1996	ELAVL4	0.470892	-0.0559089	0.997693	0.0797816	0.118186
1997	ELF1	-0.808466	-1.2547	-0.362228	0.000383853	0.000948078
1998	ELF2	-0.944496	-1.28226	-0.606736	4.23526e-08	2.16285e-07
1999	ELF3	-0.4398	-0.771937	-0.107664	0.00945088	0.0176076
2000	ELF4	0.634569	0.458674	0.810463	1.53941e-12	1.55417e-11
2001	ELF5	-0.849335	-1.06516	-0.633509	1.22906e-14	1.60276e-13
2002	ELK1	1.13895	0.575217	1.70269	7.49973e-05	0.000215086
2004	ELK3	-0.82554	-1.012	-0.639083	4.03633e-18	7.59037e-17
2005	ELK4	1.30261	1.06952	1.53571	6.4299e-28	2.86897e-26
2006	ELN	-1.27208	-1.45566	-1.08849	5.21687e-42	6.68369e-40
2009	EML1	-1.2258	-1.44639	-1.00522	1.26414e-27	5.52791e-26
2010	EMD	0.854172	0.662843	1.0455	2.13187e-18	4.09692e-17
2011	MARK2	1.04533	0.658318	1.43234	1.19704e-07	5.6825e-07
2012	EMP1	-0.563394	-0.954708	-0.17208	0.00477462	0.00945942
2013	EMP2	-3.09096	-3.88641	-2.2955	2.61733e-14	3.26169e-13
2014	EMP3	-1.51472	-2.21682	-0.812626	2.35279e-05	7.45514e-05
2015	ADGRE1	-1.61922	-2.42509	-0.813347	8.21252e-05	0.000233875
2016	EMX1	0.856599	0.168239	1.54496	0.0147284	0.0262461
2017	CTTN	0.845355	0.513235	1.17747	6.07684e-07	2.57308e-06
2018	EMX2	0.361767	0.138601	0.584934	0.00148688	0.00327878
2019	EN1	0.799422	0.170983	1.42786	0.0126589	0.0228934
2020	EN2	1.07217	0.782982	1.36135	3.68505e-13	4.00259e-12
2021	ENDOG	0.377376	0.0253288	0.729424	0.0356429	0.0579615
2022	ENG	-2.40531	-3.45923	-1.35139	7.70848e-06	2.69385e-05
2023	ENO1	2.00686	1.6035	2.41022	1.81788e-22	5.03492e-21
2026	ENO2	1.09226	0.781396	1.40313	5.71594e-12	5.3837e-11
2027	ENO3	0.350086	-0.0358081	0.73598	0.0753884	0.112422
2028	ENPEP	-0.798117	-1.13251	-0.463725	2.89716e-06	1.09245e-05
2029	ENSA	0.458545	0.124165	0.792925	0.00719336	0.0137395
2030	SLC29A1	-0.387383	-0.648704	-0.126063	0.00366711	0.00742916
2033	EP300	0.0989835	-0.406949	0.604916	0.70138	0.757056
2034	EPAS1	-3.19595	-3.74292	-2.64898	2.29591e-30	1.25121e-28
2035	EPB41	-0.102278	-0.566461	0.361905	0.665844	0.726206
2036	EPB41L1	-0.397954	-0.715402	-0.0805059	0.0140096	0.025102
2037	EPB41L2	-1.37997	-1.73429	-1.02565	2.28633e-14	2.87042e-13
2038	EPB42	-0.388933	-1.27145	0.493587	0.387714	0.463244
2039	DMTN	-0.429479	-0.782167	-0.0767911	0.0169999	0.0298545
2040	STOM	-2.40425	-2.98423	-1.82428	4.47731e-16	6.75544e-15
2041	EPHA1	1.41705	0.844617	1.98949	1.22319e-06	4.92421e-06
2042	EPHA3	-0.942637	-1.33916	-0.546116	3.17199e-06	1.18851e-05
2043	EPHA4	0.377142	-0.242817	0.9971	0.233139	0.300996
2044	EPHA5	0.054722	-0.166765	0.27621	0.628215	0.692893
2045	EPHA7	0.81687	0.586547	1.04719	3.62078e-12	3.48677e-11
2046	EPHA8	0.577542	0.167682	0.987401	0.00574787	0.0112042
2047	EPHB1	0.875796	0.404543	1.34705	0.000270025	0.000689477
2048	EPHB2	1.1168	0.656056	1.57755	2.02656e-06	7.84139e-06
2049	EPHB3	2.31112	1.62855	2.99369	3.21671e-11	2.72829e-10
2050	EPHB4	0.638678	0.462768	0.814588	1.11055e-12	1.14054e-11
2051	EPHB6	0.40815	0.152416	0.663884	0.00175945	0.00382477
2052	EPHX1	-0.694958	-0.87064	-0.519275	8.96392e-15	1.19019e-13
2053	EPHX2	-0.80421	-1.0387	-0.569724	1.79226e-11	1.58517e-10
2054	STX2	-2.14942	-2.58039	-1.71844	1.44138e-22	4.01243e-21
2055	CLN8	-0.851258	-1.2922	-0.410313	0.000154471	0.000415031
2056	EPO	0.443637	-0.00697541	0.894249	0.0536534	0.0833231
2057	EPOR	-1.7517	-2.86504	-0.638353	0.00204418	0.00437727
2058	EPRS	1.52697	0.815334	2.23861	2.60478e-05	8.17558e-05
2059	EPS8	-0.481952	-0.683297	-0.280608	2.71192e-06	1.02666e-05
2060	EPS15	-2.04084	-2.75203	-1.32965	1.86206e-08	1.01934e-07
2063	NR2F6	0.461688	-0.0636373	0.987013	0.0849725	0.124938
2064	ERBB2	-0.371552	-0.744042	0.000939042	0.0505804	0.0791341
2065	ERBB3	-0.759824	-1.11447	-0.405182	2.6781e-05	8.3805e-05
2066	ERBB4	-1.97051	-2.89226	-1.04875	2.78979e-05	8.69274e-05
2067	ERCC1	0.604784	0.14073	1.06884	0.0106387	0.0195646
2068	ERCC2	0.646724	0.160275	1.13317	0.00916782	0.0171197
2069	EREG	-0.452238	-0.83744	-0.0670351	0.0213889	0.036683
2070	EYA4	-0.725283	-0.980551	-0.470014	2.56566e-08	1.3676e-07
2071	ERCC3	0.774679	0.321915	1.22744	0.000797985	0.00185409
2072	ERCC4	0.325036	-0.0334586	0.68353	0.0755619	0.112651
2073	ERCC5	-1.25516	-1.81874	-0.691589	1.27047e-05	4.24745e-05
2074	ERCC6	0.740612	0.420164	1.06106	5.90314e-06	2.10651e-05
2077	ERF	0.673151	0.287768	1.05853	0.000618243	0.00146617
2078	ERG	-2.88935	-3.90263	-1.87608	2.28589e-08	1.23011e-07
2079	ERH	1.16151	0.711996	1.61103	4.09729e-07	1.78804e-06
2081	ERN1	-1.09762	-1.6569	-0.538329	0.000119827	0.000329547
2086	ERV3-1	0.592403	-0.126617	1.31142	0.10635	0.151944
2091	FBL	1.96701	1.41025	2.52378	4.37769e-12	4.18075e-11
2098	ESD	-0.828949	-1.26556	-0.392343	0.00019826	0.00051968
2099	ESR1	-0.454174	-0.865829	-0.0425183	0.0305873	0.050494
2100	ESR2	0.507098	0.149958	0.864237	0.00538707	0.0105592
2101	ESRRA	0.598147	0.0953384	1.10096	0.0197219	0.0340963
2103	ESRRB	0.0813309	-0.156477	0.319139	0.502659	0.576105
2104	ESRRG	-0.0891904	-0.355262	0.176881	0.511178	0.584432
2107	ETF1	-1.01227	-1.6233	-0.401241	0.00116629	0.00262844
2108	ETFA	1.12254	0.428363	1.81671	0.00152742	0.00335971
2109	ETFB	0.687842	0.506764	0.868921	9.68764e-14	1.13253e-12
2110	ETFDH	-0.495515	-0.861912	-0.129119	0.00803345	0.0151918
2113	ETS1	-1.63718	-2.04184	-1.23253	2.19648e-15	3.09855e-14
2114	ETS2	-1.29052	-1.79414	-0.786904	5.10308e-07	2.18741e-06
2115	ETV1	-1.56127	-1.91476	-1.20778	4.85772e-18	9.04187e-17
2116	ETV2	0.500706	0.0418459	0.959567	0.0324597	0.053244
2117	ETV3	-0.193488	-0.580333	0.193357	0.326932	0.401122
2118	ETV4	1.74903	1.41256	2.0855	2.23738e-24	7.32683e-23
2119	ETV5	-0.662456	-0.837985	-0.486927	1.39295e-13	1.59273e-12
2120	ETV6	0.32029	-0.202034	0.842615	0.22942	0.29685
2121	EVC	-0.5864	-0.867978	-0.304822	4.47038e-05	0.000133977
2122	MECOM	-1.35136	-1.62696	-1.07576	7.23277e-22	1.90681e-20
2123	EVI2A	-1.04856	-1.64089	-0.456223	0.000521319	0.0012541
2124	EVI2B	-1.58474	-2.1504	-1.01908	3.99726e-08	2.05135e-07
2125	EVPL	0.399292	0.0907801	0.707804	0.0111907	0.020504
2128	EVX1	0.299175	-0.209101	0.807451	0.248644	0.318127
2130	EWSR1	0.82266	0.599417	1.0459	5.10291e-13	5.46139e-12
2131	EXT1	1.4274	0.893064	1.96173	1.6431e-07	7.61519e-07
2132	EXT2	0.086408	-0.320244	0.49306	0.677069	0.736067
2134	EXTL1	0.0217403	-0.574723	0.618203	0.943049	0.95601
2135	EXTL2	-0.286764	-0.565976	-0.00755145	0.0441175	0.0701246
2137	EXTL3	0.573059	-0.00896234	1.15508	0.0536337	0.0832984
2138	EYA1	0.242314	-0.0278506	0.512478	0.0787618	0.116849
2139	EYA2	1.17292	0.225485	2.12035	0.0152483	0.0270926
2140	EYA3	0.627532	0.348846	0.906217	1.01778e-05	3.47152e-05
2145	EZH1	-1.80262	-2.63277	-0.972474	2.08158e-05	6.66713e-05
2146	EZH2	3.22271	2.72819	3.71722	2.32627e-37	2.11468e-35
2147	F2	0.404248	0.0582948	0.750201	0.0220081	0.037633
2149	F2R	-0.249416	-0.610614	0.111782	0.175927	0.236136
2150	F2RL1	1.23462	0.725673	1.74357	1.98893e-06	7.71487e-06
2151	F2RL2	0.866404	0.617446	1.11536	9.0476e-12	8.29351e-11
2152	F3	-0.62678	-0.874792	-0.378768	7.29843e-07	3.05025e-06
2153	F5	0.0794897	-0.162595	0.321575	0.519859	0.592533
2155	F7	0.379388	-0.0568969	0.815673	0.0883137	0.12927
2157	F8	-2.40598	-3.17783	-1.63413	9.99374e-10	6.62861e-09
2158	F9	0.0312483	-0.155201	0.217698	0.742547	0.793354
2159	F10	-2.31101	-3.02903	-1.59298	2.82168e-10	2.05989e-09
2160	F11	-2.44495	-3.71472	-1.17517	0.000160711	0.000429949
2161	F12	2.21344	1.30203	3.12486	1.93664e-06	7.52737e-06
2162	F13A1	-0.828889	-1.3102	-0.347583	0.000737137	0.0017224
2165	F13B	0.186105	-0.0634752	0.435685	0.143881	0.198348
2166	FAAH	-0.998765	-1.19775	-0.799778	7.75846e-23	2.20743e-21
2167	FABP4	-2.7825	-3.79434	-1.77066	7.05521e-08	3.47807e-07
2168	FABP1	0.170575	-0.327903	0.669054	0.502422	0.575864
2169	FABP2	0.174556	-0.154639	0.503751	0.298677	0.371848
2170	FABP3	-0.929436	-1.51471	-0.344161	0.00185517	0.00401691
2171	FABP5	0.961168	0.20901	1.71333	0.012259	0.0222547
2172	FABP6	-0.268482	-0.713581	0.176616	0.237109	0.305384
2173	FABP7	0.87188	0.671787	1.07197	1.33875e-17	2.36527e-16
2175	FANCA	1.48677	0.472371	2.50117	0.00407045	0.00816476
2176	FANCC	0.504476	0.175337	0.833616	0.00266401	0.00556211
2177	FANCD2	2.51616	1.87362	3.1587	1.65231e-14	2.11813e-13
2178	FANCE	2.36903	1.72514	3.01292	5.54685e-13	5.90191e-12
2180	ACSL1	-1.51268	-2.22388	-0.801482	3.06285e-05	9.47754e-05
2181	ACSL3	-0.445244	-0.903301	0.0128139	0.0567625	0.087605
2182	ACSL4	-0.786377	-1.81152	0.238771	0.13272	0.184905
2184	FAH	0.634959	0.156403	1.11352	0.00930814	0.0173655
2185	PTK2B	-0.968128	-1.38094	-0.555317	4.29597e-06	1.57148e-05
2186	BPTF	-0.345116	-0.568712	-0.121519	0.00248511	0.00522092
2187	FANCB	2.19435	1.5806	2.80809	2.42529e-12	2.38587e-11
2188	FANCF	0.95	0.0633658	1.83663	0.0357255	0.0580834
2189	FANCG	1.96802	1.33856	2.59747	8.90318e-10	5.96851e-09
2191	FAP	1.56426	1.25962	1.86891	7.98651e-24	2.48888e-22
2192	FBLN1	-1.29624	-1.65327	-0.939219	1.11097e-12	1.14054e-11
2193	FARSA	1.50881	0.995385	2.02224	8.42306e-09	4.84846e-08
2194	FASN	0.305819	-0.270203	0.881842	0.298073	0.371286
2195	FAT1	0.728098	-0.392097	1.84829	0.20269	0.267035
2196	FAT2	2.61037	1.61196	3.60878	2.98546e-07	1.33209e-06
2197	FAU	0.104544	-0.296424	0.505512	0.609338	0.675439
2199	FBLN2	-0.112361	-0.362776	0.138054	0.379166	0.45481
2200	FBN1	-0.100785	-0.323218	0.121648	0.374507	0.450189
2201	FBN2	1.28692	0.974928	1.59891	6.23957e-16	9.28645e-15
2202	EFEMP1	-2.37757	-2.82797	-1.92717	4.35205e-25	1.50386e-23
2203	FBP1	-2.63222	-3.25734	-2.0071	1.54575e-16	2.4486e-15
2204	FCAR	-0.691102	-1.17422	-0.207981	0.00505167	0.00996057
2205	FCER1A	-2.12766	-2.71561	-1.53971	1.31514e-12	1.33823e-11
2206	MS4A2	-2.12547	-2.68174	-1.5692	6.94536e-14	8.30108e-13
2207	FCER1G	-1.47172	-2.21552	-0.727911	0.000105298	0.000292954
2208	FCER2	-0.0742374	-0.549644	0.401169	0.75956	0.807435
2212	FCGR2A	-1.10244	-2.23007	0.0251864	0.0553413	0.0856227
2213	FCGR2B	-0.519353	-0.905845	-0.13286	0.00844562	0.0159053
2214	FCGR3A	-1.01247	-2.12852	0.103575	0.0753926	0.112422
2215	FCGR3B	-1.23687	-1.99012	-0.48362	0.00128932	0.0028817
2217	FCGRT	-2.29756	-3.17155	-1.42357	2.57175e-07	1.15692e-06
2218	FKTN	0.353339	-0.0401743	0.746852	0.0784301	0.11642
2219	FCN1	-2.20002	-3.12091	-1.27913	2.83583e-06	1.07116e-05
2220	FCN2	-0.276349	-0.610178	0.0574804	0.104699	0.149928
2222	FDFT1	0.0839343	-0.100815	0.268684	0.37323	0.448827
2224	FDPS	0.585304	0.273643	0.896964	0.000232463	0.00060007
2229	FDPSP5	0.389588	0.0207089	0.758467	0.0384527	0.0620111
2230	FDX1	-0.774074	-1.64993	0.101785	0.0832392	0.122703
2232	FDXR	1.25789	0.858367	1.65741	6.78873e-10	4.66377e-09
2235	FECH	0.21269	-0.0771765	0.502557	0.150398	0.206293
2237	FEN1	3.39362	2.50825	4.27899	5.80099e-14	6.99824e-13
2239	GPC4	-0.423968	-0.840989	-0.00694635	0.046304	0.0731753
2241	FER	-0.544609	-0.966029	-0.123189	0.0113124	0.0207079
2242	FES	-1.87752	-2.09357	-1.66148	4.69047e-65	1.93885e-62
2243	FGA	-0.555286	-1.13786	0.0272904	0.0617411	0.0942433
2244	FGB	0.0396346	-0.247543	0.326813	0.786774	0.830161
2245	FGD1	1.41087	0.873369	1.94837	2.67991e-07	1.20187e-06
2246	FGF1	0.114181	-0.209452	0.437813	0.489254	0.563365
2247	FGF2	-0.960977	-1.42451	-0.497441	4.83859e-05	0.000143988
2248	FGF3	0.354179	0.166871	0.541488	0.00021049	0.00054852
2249	FGF4	0.403913	0.172917	0.634909	0.000609973	0.00144828
2250	FGF5	0.661759	0.428312	0.895206	2.76074e-08	1.46269e-07
2251	FGF6	0.470874	-0.175136	1.11688	0.153116	0.209524
2252	FGF7	-1.70235	-2.08087	-1.32384	1.198e-18	2.35178e-17
2253	FGF8	0.480654	0.0540758	0.907231	0.0272149	0.0455133
2254	FGF9	-1.79327	-2.34	-1.24654	1.28704e-10	9.83485e-10
2255	FGF10	-1.87529	-2.70899	-1.0416	1.04e-05	3.54122e-05
2256	FGF11	2.55911	1.84781	3.2704	1.76924e-12	1.76585e-11
2257	FGF12	0.858891	0.680999	1.03678	2.99097e-21	7.45463e-20
2258	FGF13	-0.131351	-0.317624	0.0549223	0.16695	0.225662
2259	FGF14	-1.5279	-1.96632	-1.08949	8.45757e-12	7.78196e-11
2260	FGFR1	-0.692926	-0.992508	-0.393345	5.80517e-06	2.07403e-05
2261	FGFR3	0.935662	0.402285	1.46904	0.000585569	0.00139518
2262	GPC5	-1.19622	-2.0072	-0.385234	0.00384033	0.00773931
2263	FGFR2	0.481447	0.232555	0.73034	0.000149877	0.000403776
2264	FGFR4	-2.51627	-3.32401	-1.70854	1.02344e-09	6.77181e-09
2266	FGG	-1.0042	-1.54701	-0.461389	0.000287924	0.000730665
2267	FGL1	0.0616659	-0.452828	0.57616	0.814274	0.853138
2268	FGR	-2.31789	-3.526	-1.10978	0.000169647	0.000451486
2271	FH	1.33517	0.836302	1.83404	1.55749e-07	7.24174e-07
2272	FHIT	-0.91615	-1.63001	-0.202291	0.0118906	0.021656
2273	FHL1	-3.16309	-4.27087	-2.05531	2.18906e-08	1.18094e-07
2274	FHL2	1.16774	0.810866	1.52462	1.42485e-10	1.08199e-09
2275	FHL3	0.620342	0.414746	0.825937	3.34333e-09	2.03857e-08
2277	VEGFD	-3.74158	-4.0711	-3.41206	1.01179e-109	3.16662e-106
2280	FKBP1A	0.161461	-0.0396543	0.362576	0.1156	0.16356
2281	FKBP1B	-1.2581	-1.72235	-0.793853	1.08762e-07	5.20368e-07
2286	FKBP2	0.175995	-0.0740692	0.42606	0.167765	0.226624
2287	FKBP3	1.62068	0.875092	2.36628	2.04109e-05	6.54703e-05
2288	FKBP4	2.20119	1.62987	2.77251	4.30776e-14	5.2547e-13
2289	FKBP5	-0.524591	-0.841454	-0.207728	0.00117506	0.00264602
2290	FOXG1	0.286085	-0.170731	0.742901	0.219656	0.286084
2294	FOXF1	-2.96579	-3.86434	-2.06723	9.86005e-11	7.67913e-10
2295	FOXF2	-1.19834	-1.78845	-0.608239	6.88706e-05	0.000198895
2296	FOXC1	0.0228233	-0.384063	0.42971	0.912458	0.933202
2297	FOXD1	2.1985	1.30386	3.09313	1.46138e-06	5.80523e-06
2298	FOXD4	-0.0637421	-0.334096	0.206612	0.644005	0.706999
2299	FOXI1	0.566244	0.0420506	1.09044	0.0342436	0.0558731
2300	FOXL1	0.482294	0.0557165	0.908871	0.0266942	0.0447518
2301	FOXE3	0.154293	-0.44538	0.753966	0.614058	0.679743
2302	FOXJ1	-1.02666	-1.50555	-0.54777	2.64762e-05	8.29194e-05
2303	FOXC2	0.307079	-0.155791	0.76995	0.193502	0.256225
2304	FOXE1	2.33892	1.50128	3.17657	4.43216e-08	2.25918e-07
2305	FOXM1	3.64349	1.85691	5.43008	6.41277e-05	0.000186253
2306	FOXD2	0.479669	0.0820575	0.87728	0.0180567	0.0315333
2307	FOXS1	-0.531705	-0.790977	-0.272432	5.83456e-05	0.000170887
2308	FOXO1	-0.875851	-1.0539	-0.697804	5.33898e-22	1.42991e-20
2309	FOXO3	-0.538967	-0.875305	-0.20263	0.0016851	0.00367774
2312	FLG	0.451673	0.141982	0.761363	0.00425599	0.00850189
2313	FLI1	-2.45354	-3.13393	-1.77315	1.57461e-12	1.58824e-11
2314	FLII	-0.688898	-1.02667	-0.351129	6.40286e-05	0.000186023
2315	MLANA	-0.0692179	-0.541972	0.403536	0.774138	0.819717
2316	FLNA	-0.651748	-0.918547	-0.384949	1.68546e-06	6.63446e-06
2317	FLNB	-0.042254	-0.480945	0.396437	0.850265	0.88249
2318	FLNC	-0.616682	-1.33151	0.0981426	0.0908619	0.132601
2319	FLOT2	-0.114855	-0.287863	0.0581518	0.193199	0.255911
2321	FLT1	-0.459766	-0.997805	0.0782723	0.0939668	0.136473
2322	FLT3	-0.540952	-0.919116	-0.162789	0.00505243	0.00996118
2323	FLT3LG	-0.885223	-1.3887	-0.381749	0.000568816	0.00135807
2324	FLT4	-1.55946	-2.38495	-0.73397	0.000213375	0.000555247
2326	FMO1	0.702213	0.145695	1.25873	0.0133956	0.0241004
2327	FMO2	-2.94701	-3.60422	-2.2898	1.51262e-18	2.93781e-17
2328	FMO3	-1.16403	-1.50685	-0.821202	2.83576e-11	2.42679e-10
2329	FMO4	0.280862	0.0924017	0.469322	0.00348987	0.00709502
2330	FMO5	-2.67042	-3.28255	-2.05829	1.22693e-17	2.17824e-16
2331	FMOD	-0.51025	-0.896907	-0.123593	0.00969691	0.018011
2332	FMR1	0.109446	-0.0786893	0.297581	0.254207	0.32432
2334	AFF2	0.2986	-0.121975	0.719175	0.164063	0.222241
2335	FN1	-0.446548	-0.703309	-0.189786	0.000652795	0.00153944
2339	FNTA	0.80034	0.623393	0.977287	7.6491e-19	1.52342e-17
2342	FNTB	1.1341	0.865682	1.40252	1.22084e-16	1.958e-15
2346	FOLH1	1.27712	0.802643	1.75159	1.32371e-07	6.23652e-07
2348	FOLR1	-3.28291	-4.20225	-2.36357	2.57983e-12	2.52995e-11
2350	FOLR2	-1.19741	-1.60791	-0.786914	1.08322e-08	6.1289e-08
2352	FOLR3	-1.30534	-1.7606	-0.850074	1.91353e-08	1.04309e-07
2353	FOS	-1.67261	-2.06216	-1.28307	3.90869e-17	6.52183e-16
2354	FOSB	-1.90667	-2.52325	-1.29008	1.35444e-09	8.79726e-09
2355	FOSL2	0.542825	0.141712	0.943938	0.00799184	0.0151183
2356	FPGS	-0.1229	-0.309167	0.0633676	0.195945	0.259163
2357	FPR1	-1.30263	-2.15673	-0.448531	0.00279669	0.00581239
2358	FPR2	-1.41139	-2.06903	-0.753746	2.59545e-05	8.14979e-05
2359	FPR3	-0.702922	-1.00415	-0.401692	4.79449e-06	1.74048e-05
2395	FXN	0.819891	0.642075	0.997707	1.60762e-19	3.41608e-18
2444	FRK	1.36848	0.872866	1.86409	6.23798e-08	3.10172e-07
2475	MTOR	0.254003	-0.351647	0.859653	0.411084	0.486155
2483	FRG1	-0.306573	-0.736686	0.123539	0.16241	0.220205
2487	FRZB	-1.02662	-1.34787	-0.705362	3.7675e-10	2.69733e-09
2488	FSHB	0.41126	-0.167234	0.989753	0.163508	0.221571
2491	CENPI	2.59924	1.54213	3.65636	1.44145e-06	5.73646e-06
2492	FSHR	-0.140938	-0.721336	0.439459	0.634118	0.698511
2494	NR5A2	-1.60902	-2.18284	-1.03519	3.89031e-08	2.00068e-07
2495	FTH1	-1.34652	-2.35567	-0.337363	0.00891788	0.0167014
2509	FTH1P5	-0.380072	-1.24674	0.486594	0.390047	0.465447
2512	FTL	-0.329329	-0.559416	-0.0992418	0.00502632	0.00991595
2515	ADAM2	0.0645417	-0.121834	0.250917	0.497306	0.571256
2516	NR5A1	0.517286	0.274693	0.759879	2.92441e-05	9.08379e-05
2517	FUCA1	-1.03819	-1.28692	-0.789473	2.81162e-16	4.35622e-15
2519	FUCA2	0.103977	-0.111622	0.319577	0.34454	0.418925
2520	GAST	1.12357	0.927712	1.31943	2.48838e-29	1.23899e-27
2521	FUS	0.82197	0.560334	1.08361	7.38892e-10	5.0366e-09
2523	FUT1	-0.549003	-0.804903	-0.293103	2.61227e-05	8.19672e-05
2524	FUT2	1.26135	0.565051	1.95765	0.000384519	0.000949401
2525	FUT3	0.716852	0.196326	1.23738	0.00695064	0.0133165
2526	FUT4	-0.271521	-0.486575	-0.0564666	0.0133389	0.0240063
2527	FUT5	0.22815	-0.12759	0.58389	0.208752	0.273853
2528	FUT6	0.492786	0.0372144	0.948358	0.0340003	0.0555258
2529	FUT7	0.114786	-0.28288	0.512452	0.571569	0.640344
2530	FUT8	0.810573	0.392712	1.22843	0.000143553	0.000388171
2531	KDSR	-0.514131	-0.903211	-0.125052	0.00960022	0.0178481
2532	ACKR1	-2.13227	-2.66725	-1.59729	5.63607e-15	7.61721e-14
2533	FYB	-0.49415	-0.842086	-0.146214	0.00537581	0.0105399
2534	FYN	-1.81122	-2.27264	-1.34981	1.43118e-14	1.8509e-13
2535	FZD2	0.395732	0.0589578	0.732507	0.0212739	0.0365143
2537	IFI6	-0.0340718	-0.329223	0.26108	0.821003	0.858505
2538	G6PC	0.0780335	-0.22018	0.376247	0.608047	0.674213
2539	G6PD	1.14563	0.921704	1.36956	1.15569e-23	3.52631e-22
2542	SLC37A4	0.651154	0.246777	1.05553	0.00159918	0.00350524
2543	GAGE1	0.555936	0.358688	0.753184	3.31194e-08	1.73128e-07
2547	XRCC6	0.80714	-0.769425	2.3837	0.315656	0.389292
2548	GAA	-0.554534	-0.786951	-0.322118	2.91994e-06	1.10047e-05
2549	GAB1	-1.124	-1.77843	-0.469572	0.000761842	0.00177633
2550	GABBR1	-0.472197	-0.838067	-0.106326	0.0114208	0.0208871
2551	GABPA	-0.156148	-0.696605	0.38431	0.571211	0.640009
2553	GABPB1	1.29627	1.02349	1.56905	1.23201e-20	2.89291e-19
2554	GABRA1	0.274858	0.100642	0.449074	0.00198672	0.00427052
2555	GABRA2	0.278969	-0.219947	0.777886	0.273117	0.344549
2556	GABRA3	1.43978	0.216442	2.66311	0.0210695	0.0361975
2557	GABRA4	0.00985206	-0.538112	0.557816	0.971889	0.978384
2558	GABRA5	0.58368	0.276067	0.891294	0.000200072	0.000523865
2559	GABRA6	0.0858542	-0.1794	0.351108	0.525835	0.597882
2560	GABRB1	0.280773	0.0343077	0.527239	0.0255629	0.0430754
2561	GABRB2	-0.361983	-1.2952	0.571235	0.447108	0.522302
2562	GABRB3	-0.0692469	-0.402942	0.264448	0.684212	0.742138
2563	GABRD	0.370443	0.19712	0.543765	2.80136e-05	8.72382e-05
2564	GABRE	1.12035	0.76925	1.47145	3.99639e-10	2.85375e-09
2565	GABRG1	0.311269	-0.255561	0.8781	0.281795	0.353726
2566	GABRG2	0.717728	0.427904	1.00755	1.21168e-06	4.8815e-06
2567	GABRG3	0.518375	0.105681	0.931069	0.0138218	0.024804
2568	GABRP	0.50848	0.0375645	0.979395	0.0343186	0.0559663
2569	GABRR1	1.57031	1.16157	1.97904	5.07528e-14	6.14305e-13
2570	GABRR2	0.201029	-0.23665	0.638708	0.368	0.443463
2571	GAD1	1.17449	0.823372	1.52561	5.52474e-11	4.48282e-10
2572	GAD2	0.344881	0.131956	0.557807	0.00150041	0.00330595
2580	GAK	-0.738384	-0.92037	-0.556398	1.83096e-15	2.60134e-14
2581	GALC	-1.73128	-2.06672	-1.39583	4.70535e-24	1.50051e-22
2582	GALE	-0.297062	-0.546644	-0.0474795	0.0196576	0.0340065
2583	B4GALNT1	1.01177	0.333738	1.6898	0.00344801	0.00702166
2584	GALK1	0.0108586	-0.28115	0.302867	0.941899	0.955303
2585	GALK2	-0.447255	-0.873073	-0.021438	0.0395288	0.0635781
2587	GALR1	-0.229887	-0.691167	0.231394	0.328678	0.40279
2588	GALNS	0.77713	0.570636	0.983623	1.62816e-13	1.84244e-12
2589	GALNT1	1.49628	1.16904	1.82352	3.19414e-19	6.583e-18
2590	GALNT2	1.44808	0.875128	2.02102	7.28381e-07	3.0453e-06
2591	GALNT3	1.36087	1.01852	1.70323	6.65399e-15	8.9378e-14
2592	GALT	-1.05546	-1.61144	-0.499483	0.000198616	0.000520488
2593	GAMT	1.32833	0.888228	1.76843	3.30578e-09	2.01679e-08
2595	GANC	-1.38162	-2.24694	-0.516312	0.00175146	0.00380929
2596	GAP43	1.09516	0.776355	1.41397	1.6642e-11	1.47489e-10
2597	GAPDH	3.61999	2.5219	4.71807	1.03806e-10	8.05307e-10
2615	LRRC32	-2.39436	-3.13415	-1.65458	2.24491e-10	1.66266e-09
2617	GARS	2.19943	1.52139	2.87746	2.04685e-10	1.52318e-09
2618	GART	1.91424	1.55538	2.27311	1.3926e-25	5.08484e-24
2619	GAS1	-0.17841	-0.539281	0.182461	0.332554	0.406698
2620	GAS2	-0.876124	-1.35046	-0.401784	0.000294456	0.000745514
2621	GAS6	-2.38513	-2.90275	-1.86751	1.69582e-19	3.59304e-18
2622	GAS8	-0.813223	-1.40089	-0.225559	0.00668295	0.0128554
2623	GATA1	-0.174835	-1.16494	0.815264	0.729269	0.78199
2624	GATA2	-2.66178	-3.54911	-1.77445	4.11718e-09	2.47936e-08
2625	GATA3	-0.353513	-0.668946	-0.0380789	0.0280512	0.0467513
2626	GATA4	0.376908	0.170915	0.582901	0.000335568	0.000838175
2627	GATA6	-2.62706	-3.41651	-1.83761	6.92735e-11	5.53885e-10
2628	GATM	0.347964	0.174279	0.52165	8.61474e-05	0.000244376
2629	GBA	0.234917	-0.115905	0.585739	0.189375	0.251628
2630	GBAP1	0.507176	0.27318	0.741172	2.15556e-05	6.87996e-05
2631	GBAS	0.523827	0.334902	0.712753	5.50051e-08	2.76452e-07
2632	GBE1	0.0348022	-0.343867	0.413471	0.857048	0.887805
2633	GBP1	-0.189383	-0.790505	0.41174	0.536916	0.60817
2634	GBP2	-0.670074	-0.989866	-0.350283	4.01161e-05	0.000121323
2635	GBP3	-1.24039	-1.4303	-1.05048	1.61231e-37	1.48414e-35
2636	GBX1	0.138654	-0.258141	0.535448	0.49342	0.567387
2637	GBX2	0.651463	0.253208	1.04972	0.0013455	0.00299473
2638	GC	-0.268231	-0.49144	-0.0450218	0.0185081	0.0322471
2639	GCDH	0.776362	0.388046	1.16468	8.90792e-05	0.000251683
2641	GCG	-0.00815019	-0.378892	0.362591	0.965632	0.973453
2642	GCGR	0.277386	-0.0988803	0.653652	0.148486	0.203927
2643	GCH1	-0.207916	-0.469681	0.0538498	0.119526	0.16856
2644	GCHFR	-1.54926	-1.84518	-1.25335	1.05206e-24	3.54593e-23
2645	GCK	0.23858	0.0513564	0.425804	0.012504	0.0226395
2646	GCKR	0.510577	0.129812	0.891342	0.00858469	0.016145
2647	BLOC1S1	-0.672918	-1.33712	-0.00872093	0.0470668	0.0742415
2648	KAT2A	1.3305	0.840597	1.82041	1.02103e-07	4.91187e-07
2649	NR6A1	0.361091	0.0133961	0.708787	0.0418028	0.0668381
2650	GCNT1	-0.0803456	-0.585414	0.424722	0.755201	0.803621
2651	GCNT2	-0.425838	-0.828027	-0.0236498	0.0379666	0.061322
2653	GCSH	1.15249	0.771003	1.53398	3.19736e-09	1.95664e-08
2657	GDF1	0.291842	-0.553488	1.13717	0.498623	0.572438
2658	GDF2	-0.27271	-1.35726	0.811839	0.62213	0.687081
2660	MSTN	-0.234824	-0.515623	0.0459758	0.101202	0.145548
2661	GDF9	0.231963	-0.260753	0.72468	0.356153	0.431178
2662	GDF10	-2.77043	-4.09161	-1.44924	3.95857e-05	0.000119885
2664	GDI1	0.273474	-0.0945875	0.641535	0.145316	0.20015
2665	GDI2	0.43838	0.263966	0.612793	8.38186e-07	3.46537e-06
2668	GDNF	0.93995	0.632005	1.24789	2.19785e-09	1.38483e-08
2669	GEM	-0.922728	-1.20862	-0.636836	2.51807e-10	1.85183e-09
2670	GFAP	0.19063	-0.107377	0.488636	0.20993	0.275195
2671	GFER	0.110294	-0.543717	0.764305	0.740997	0.791842
2672	GFI1	-0.068037	-0.42506	0.288986	0.708772	0.763448
2673	GFPT1	0.789326	0.413769	1.16488	3.79936e-05	0.00011543
2674	GFRA1	-0.996017	-1.52003	-0.472004	0.00019501	0.000511833
2675	GFRA2	-1.08877	-1.75028	-0.42725	0.00125606	0.00281339
2676	GFRA3	0.114226	-0.175311	0.403762	0.439386	0.514548
2677	GGCX	0.72868	0.1156	1.34176	0.0198312	0.0342638
2678	GGT1	-1.25446	-1.93877	-0.570163	0.000326875	0.000819075
2679	GGT3P	-0.818298	-1.67494	0.0383495	0.0611758	0.0935465
2681	GGTA1P	-2.34774	-2.58539	-2.11009	1.61037e-83	1.53391e-80
2683	B4GALT1	0.213767	-0.157514	0.585048	0.259126	0.329461
2686	GGT7	0.0892869	-0.119394	0.297968	0.401695	0.477041
2687	GGT5	0.317414	0.00917031	0.625657	0.0435628	0.0693384
2688	GH1	0.047673	-0.438338	0.533684	0.847543	0.880166
2689	GH2	0.747573	0.349064	1.14608	0.000236231	0.000609081
2690	GHR	-0.416617	-0.714618	-0.118617	0.00614175	0.0119011
2691	GHRH	0.0610725	-0.382137	0.504282	0.787102	0.830468
2692	GHRHR	-0.148958	-0.61243	0.314513	0.528742	0.60072
2693	GHSR	0.492083	0.0456891	0.938478	0.0307286	0.0507006
2694	GIF	-0.00849034	-0.239076	0.222095	0.942469	0.955686
2695	GIP	0.239317	0.0524934	0.426141	0.0120502	0.0219156
2696	GIPR	-0.0969317	-0.462238	0.268375	0.603019	0.669587
2697	GJA1	0.426767	0.24352	0.610013	5.00452e-06	1.81042e-05
2700	GJA3	1.38983	0.623357	2.15631	0.000379477	0.00093801
2701	GJA4	-2.77381	-2.99933	-2.54829	2.14546e-128	1.56676e-124
2702	GJA5	-1.39456	-1.81094	-0.978183	5.22227e-11	4.26265e-10
2703	GJA8	0.0852664	-0.624129	0.794662	0.813759	0.852721
2705	GJB1	-0.684207	-1.28107	-0.0873482	0.0246529	0.0417063
2706	GJB2	3.4601	2.15886	4.76134	1.87128e-07	8.61079e-07
2707	GJB3	2.83719	2.0348	3.63958	4.20092e-12	4.01894e-11
2709	GJB5	2.68404	1.22233	4.14575	0.000319512	0.000802359
2710	GK	-1.04218	-2.05454	-0.0298274	0.0436214	0.0694215
2712	GK2	0.226694	-0.036389	0.489778	0.0912449	0.133053
2713	GK3P	-0.183283	-1.60396	1.23739	0.800378	0.841597
2717	GLA	0.56899	0.393866	0.744114	1.91436e-10	1.43042e-09
2719	GPC3	-0.765346	-1.10454	-0.426152	9.76146e-06	3.34147e-05
2720	GLB1	-1.10568	-1.5626	-0.648766	2.10694e-06	8.12657e-06
2729	GCLC	2.47737	1.82958	3.12517	6.60474e-14	7.93293e-13
2730	GCLM	1.33922	1.03503	1.64341	6.19486e-18	1.13857e-16
2731	GLDC	0.583511	0.408088	0.758933	7.05543e-11	5.63303e-10
2733	GLE1	0.70536	0.52747	0.88325	7.7529e-15	1.03631e-13
2734	GLG1	0.579237	0.117609	1.04086	0.0139206	0.0249671
2735	GLI1	0.470341	0.246996	0.693686	3.66776e-05	0.000111713
2736	GLI2	0.959104	0.622665	1.29554	2.30537e-08	1.23941e-07
2737	GLI3	0.229825	-0.27047	0.730121	0.367925	0.443396
2738	GLI4	1.33167	0.719799	1.94355	1.9934e-05	6.41189e-05
2739	GLO1	0.471216	0.291865	0.650567	2.61199e-07	1.17334e-06
2740	GLP1R	-0.00852158	-0.74891	0.731867	0.982003	0.9862
2741	GLRA1	0.18757	0.000987655	0.374152	0.0487995	0.0767315
2742	GLRA2	0.238884	-0.171281	0.649049	0.253662	0.323715
2743	GLRB	-0.622395	-0.803357	-0.441433	1.57261e-11	1.39711e-10
2744	GLS	-1.59642	-2.60208	-0.590756	0.00186264	0.00403269
2745	GLRX	-1.92439	-2.43863	-1.41014	2.22527e-13	2.48224e-12
2746	GLUD1	-0.144554	-0.488918	0.19981	0.410658	0.485845
2747	GLUD2	-0.133846	-0.326125	0.0584319	0.172459	0.232163
2752	GLUL	-0.631221	-1.02054	-0.241907	0.00148386	0.0032731
2760	GM2A	0.498524	0.323891	0.673157	2.20501e-08	1.18896e-07
2762	GMDS	1.18276	0.827737	1.53779	6.59574e-11	5.30468e-10
2764	GMFB	0.0740361	-0.487331	0.635403	0.796028	0.837788
2765	GML	0.211369	-0.0831639	0.505902	0.15956	0.217067
2766	GMPR	-1.58625	-2.06506	-1.10744	8.40387e-11	6.6275e-10
2767	GNA11	-1.24653	-1.43002	-1.06304	1.89463e-40	2.19617e-38
2768	GNA12	0.444758	0.214573	0.674943	0.000152479	0.00041008
2769	GNA15	0.852438	0.674754	1.03012	5.30528e-21	1.29286e-19
2770	GNAI1	0.480951	0.236123	0.725779	0.000118003	0.00032506
2771	GNAI2	-2.0612	-2.62359	-1.49882	6.7983e-13	7.16733e-12
2773	GNAI3	0.878553	0.520551	1.23655	1.51046e-06	5.98503e-06
2774	GNAL	0.332537	0.036551	0.628523	0.0276655	0.0461787
2775	GNAO1	0.122402	-0.248198	0.493003	0.517412	0.59042
2776	GNAQ	-2.65795	-3.52085	-1.79504	1.56846e-09	1.00827e-08
2778	GNAS	0.4022	-0.0452611	0.849661	0.078118	0.116036
2779	GNAT1	0.204722	-0.175315	0.584758	0.291054	0.363702
2780	GNAT2	0.0575863	-0.216499	0.331671	0.680489	0.738978
2781	GNAZ	-0.14569	-0.360592	0.0692124	0.183938	0.245575
2782	GNB1	-0.362752	-0.576877	-0.148627	0.000898873	0.00206594
2783	GNB2	0.338772	0.165322	0.512222	0.000129144	0.000352428
2784	GNB3	0.547696	-0.0942583	1.18965	0.0944884	0.137117
2785	GNG3	0.134302	-0.327082	0.595686	0.568328	0.637137
2786	GNG4	1.16205	0.664584	1.65952	4.68691e-06	1.70481e-05
2787	GNG5	-0.750243	-1.0369	-0.463589	2.90204e-07	1.29698e-06
2788	GNG7	-0.897515	-1.54564	-0.249391	0.00664485	0.0127888
2790	GNG10	-0.132511	-0.700981	0.435959	0.647765	0.710201
2791	GNG11	-3.6649	-4.97171	-2.35808	3.87122e-08	1.9932e-07
2792	GNGT1	1.43862	0.622078	2.25516	0.000554068	0.00132574
2793	GNGT2	-1.23066	-2.04555	-0.415763	0.00307691	0.00633722
2794	GNL1	-0.548039	-1.02819	-0.067888	0.025281	0.0426569
2796	GNRH1	-0.49495	-0.912676	-0.0772232	0.0202171	0.0348863
2797	GNRH2	0.0555106	-0.40205	0.513072	0.812052	0.851373
2798	GNRHR	0.437909	0.0388546	0.836964	0.0314921	0.0518392
2799	GNS	-0.93726	-1.42729	-0.447229	0.00017773	0.00047105
2800	GOLGA1	-0.13371	-0.45289	0.185471	0.411613	0.486624
2801	GOLGA2	0.162455	-0.26379	0.5887	0.455062	0.530011
2802	GOLGA3	0.405654	-0.0158483	0.827155	0.0592585	0.0909702
2803	GOLGA4	-0.462985	-0.734363	-0.191606	0.000826427	0.00191146
2804	GOLGB1	0.0824535	-0.293238	0.458145	0.667082	0.72734
2805	GOT1	1.38106	0.844312	1.9178	4.58205e-07	1.98308e-06
2806	GOT2	2.09155	1.38337	2.79973	7.09858e-09	4.13496e-08
2810	SFN	2.69956	1.9708	3.42831	3.86002e-13	4.18847e-12
2811	GP1BA	-0.219322	-0.639012	0.200368	0.305722	0.379029
2813	GP2	0.276331	0.0424134	0.510249	0.0205943	0.0354698
2814	GP5	-0.235462	-0.809838	0.338914	0.4217	0.497074
2815	GP9	-1.02128	-2.58086	0.538299	0.199328	0.263064
2817	GPC1	2.41896	1.66335	3.17457	3.50782e-10	2.52379e-09
2819	GPD1	-2.50115	-3.62259	-1.37972	1.23484e-05	4.13812e-05
2820	GPD2	1.55073	1.16082	1.94063	6.43146e-15	8.6495e-14
2821	GPI	2.5924	1.8729	3.31189	1.64229e-12	1.6527e-11
2822	GPLD1	0.156809	-0.157077	0.470696	0.327508	0.401513
2823	GPM6A	-4.03917	-5.84952	-2.22882	1.22564e-05	4.10947e-05
2824	GPM6B	-1.98133	-2.32652	-1.63614	2.31943e-29	1.1575e-27
2825	GPR1	0.327608	-0.0250596	0.680276	0.0686533	0.103485
2826	CCR10	-0.657154	-0.901362	-0.412947	1.33343e-07	6.2796e-07
2827	GPR3	0.190108	-0.0715402	0.451757	0.154426	0.211053
2828	GPR4	-1.15185	-1.84355	-0.460153	0.00109915	0.00248763
2829	XCR1	0.0187042	-0.36823	0.405638	0.924518	0.94215
2830	GPR6	0.203945	0.0171088	0.390781	0.0324	0.0531541
2831	NPBWR1	0.346038	-0.201807	0.893883	0.215723	0.281782
2832	NPBWR2	0.157532	-0.037577	0.35264	0.113539	0.160966
2833	CXCR3	-0.16352	-0.592916	0.265876	0.455438	0.530335
2834	PRLHR	0.00913101	-0.185892	0.204154	0.926884	0.944166
2835	GPR12	-0.214211	-0.682005	0.253584	0.369453	0.444968
2837	UTS2R	0.129645	-0.0496998	0.308991	0.156535	0.213561
2838	GPR15	0.0708696	-0.145684	0.287424	0.521251	0.593717
2840	GPR17	-0.695055	-1.59337	0.203258	0.129396	0.180825
2841	GPR18	-0.292131	-0.59292	0.008657	0.0569683	0.0878854
2842	GPR19	0.892267	0.115545	1.66899	0.0243522	0.0412581
2843	GPR20	-1.38468	-1.8713	-0.898064	2.44549e-08	1.30832e-07
2844	GPR21	-0.101464	-0.509601	0.306673	0.62608	0.690747
2845	GPR22	-0.146499	-0.464033	0.171035	0.365858	0.441245
2846	LPAR4	0.298028	-0.135587	0.731643	0.177947	0.238496
2847	MCHR1	1.25038	0.950276	1.55049	3.18468e-16	4.89958e-15
2848	GPR25	0.376794	-0.0585026	0.81209	0.0897817	0.131199
2849	GPR26	0.120397	-0.16546	0.406253	0.40909	0.484372
2850	GPR27	0.266827	-0.0411299	0.574783	0.0894707	0.130806
2852	GPER1	-1.78057	-2.5575	-1.00365	7.05938e-06	2.48166e-05
2853	GPR31	0.00979138	-0.422329	0.441912	0.964577	0.972747
2854	GPR32	0.152608	-0.114859	0.420074	0.263442	0.334122
2857	GPR34	-0.84797	-1.36573	-0.330207	0.00132761	0.00295882
2859	GPR35	0.0262301	-0.392126	0.444586	0.902197	0.925041
2861	GPR37	0.716504	0.526097	0.906912	1.639e-13	1.85376e-12
2862	MLNR	0.352862	0.157199	0.548524	0.000408327	0.00100336
2863	GPR39	-1.26921	-1.86643	-0.671991	3.10923e-05	9.60477e-05
2864	FFAR1	0.0342434	-0.389115	0.457602	0.874038	0.901993
2865	FFAR3	-0.114727	-1.79662	1.56716	0.893644	0.918107
2867	FFAR2	-0.292257	-0.642298	0.0577833	0.101751	0.146223
2868	GRK4	-0.261803	-0.682884	0.159278	0.223	0.289917
2869	GRK5	-3.13217	-4.07607	-2.18827	7.83134e-11	6.20228e-10
2870	GRK6	-0.0743472	-0.290783	0.142089	0.500782	0.574384
2872	MKNK2	-0.199777	-0.706892	0.307339	0.440042	0.515146
2873	GPS1	1.25714	0.677394	1.83688	2.1371e-05	6.82602e-05
2874	GPS2	-0.70903	-1.02909	-0.388971	1.4124e-05	4.68053e-05
2875	GPT	0.0913155	-0.384344	0.566975	0.706718	0.76191
2876	GPX1	-0.585351	-1.12135	-0.049355	0.0323193	0.0530336
2877	GPX2	2.58442	1.79699	3.37185	1.25284e-10	9.58688e-10
2878	GPX3	-3.1097	-4.05629	-2.1631	1.20443e-10	9.24553e-10
2879	GPX4	-0.269047	-0.466989	-0.0711055	0.00772108	0.0146517
2880	GPX5	0.0847445	-0.607164	0.776653	0.810288	0.849815
2882	GPX7	0.750268	0.464889	1.03565	2.56625e-07	1.15468e-06
2885	GRB2	-0.165873	-0.536485	0.204739	0.380373	0.455989
2886	GRB7	0.61544	0.440215	0.790665	5.82088e-12	5.47078e-11
2887	GRB10	0.269418	-0.251584	0.790419	0.310809	0.38444
2888	GRB14	-0.339167	-0.918852	0.240517	0.251483	0.321347
2889	RAPGEF1	-0.938226	-1.49254	-0.383916	0.000908469	0.00208624
2890	GRIA1	-2.44959	-3.43488	-1.46431	1.10019e-06	4.46846e-06
2891	GRIA2	0.419947	0.2286	0.611294	1.6964e-05	5.53293e-05
2892	GRIA3	0.508977	0.0850856	0.932869	0.0186038	0.032388
2893	GRIA4	0.235352	-0.106919	0.577623	0.177753	0.23828
2894	GRID1	-0.773784	-1.55029	0.00271922	0.0508077	0.0794727
2895	GRID2	0.290137	-0.0778321	0.658107	0.12225	0.17197
2896	GRN	-1.29365	-1.94593	-0.641362	0.000101448	0.00028334
2897	GRIK1	-0.0664687	-0.290073	0.157136	0.56015	0.629321
2898	GRIK2	0.653464	0.320387	0.986541	0.000120426	0.000330946
2899	GRIK3	0.244834	-0.0823436	0.572011	0.142462	0.196726
2900	GRIK4	-0.782661	-1.59003	0.0247102	0.057436	0.0885136
2901	GRIK5	0.386799	0.136369	0.637229	0.00246795	0.00518636
2902	GRIN1	0.492437	0.0722636	0.912609	0.021616	0.0370376
2903	GRIN2A	0.30613	-0.0621422	0.674402	0.103262	0.148064
2904	GRIN2B	0.157398	-0.0293895	0.344186	0.0986202	0.142386
2905	GRIN2C	0.433721	0.169391	0.698052	0.00130003	0.00290416
2906	GRIN2D	0.946232	0.36473	1.52773	0.0014262	0.00315735
2907	GRINA	-0.151722	-0.324365	0.0209209	0.0849871	0.124951
2908	NR3C1	-1.74757	-2.63581	-0.859323	0.000115205	0.000317952
2909	ARHGAP35	0.217326	-0.200752	0.635404	0.308283	0.381769
2911	GRM1	0.261426	-0.0338408	0.556692	0.0826823	0.122021
2912	GRM2	0.367687	0.168334	0.56704	0.000300399	0.000758807
2913	GRM3	-0.301441	-0.778853	0.175972	0.21589	0.281947
2914	GRM4	0.588488	0.0625202	1.11446	0.0283118	0.0471461
2915	GRM5	0.384892	-0.129466	0.89925	0.142476	0.196729
2916	GRM6	-0.384741	-0.711041	-0.0584403	0.0208333	0.035831
2917	GRM7	0.057556	-0.468632	0.583744	0.830245	0.866267
2918	GRM8	0.129495	-0.0572	0.316189	0.173999	0.233878
2919	CXCL1	-0.100594	-0.437996	0.236808	0.558985	0.628255
2920	CXCL2	-1.92592	-2.63818	-1.21365	1.1604e-07	5.52413e-07
2921	CXCL3	-1.44245	-2.03802	-0.846876	2.06517e-06	7.97951e-06
2922	GRP	-0.274321	-0.522416	-0.0262262	0.0302232	0.0499683
2923	PDIA3	0.596279	0.0915231	1.10104	0.0205939	0.0354698
2925	GRPR	0.289779	-0.0974036	0.676962	0.142404	0.196659
2926	GRSF1	0.225464	-0.168978	0.619906	0.262578	0.333143
2928	GSC2	0.312799	0.11739	0.508208	0.00170457	0.00371541
2931	GSK3A	1.02981	0.659846	1.39977	4.87875e-08	2.47073e-07
2932	GSK3B	0.580651	0.205415	0.955886	0.0024221	0.00509686
2934	GSN	-0.693084	-0.992024	-0.394144	5.51637e-06	1.97892e-05
2935	GSPT1	0.157761	-0.615233	0.930755	0.689148	0.746363
2936	GSR	1.1893	0.885267	1.49333	1.76162e-14	2.24382e-13
2937	GSS	1.32488	0.369997	2.27975	0.0065398	0.0126033
2938	GSTA1	0.508997	0.110172	0.907822	0.0123707	0.0224279
2939	GSTA2	-0.166484	-0.904072	0.571103	0.658205	0.719159
2940	GSTA3	-0.481731	-1.077	0.113537	0.112709	0.159955
2941	GSTA4	0.196774	0.0238534	0.369694	0.0257256	0.0433135
2944	GSTM1	0.370202	0.136309	0.604095	0.00192087	0.00414431
2946	GSTM2	0.618621	0.383446	0.853796	2.5277e-07	1.13851e-06
2947	GSTM3	0.306646	0.0491621	0.564129	0.019586	0.0339041
2948	GSTM4	0.60551	0.423437	0.787584	7.11941e-11	5.67584e-10
2949	GSTM5	-2.0128	-2.53996	-1.48564	7.23415e-14	8.61335e-13
[truncated: 19,909 more rows]

## Sheet: S3_AD_TvsN_fgsea
library	pathway	pval	padj	ES	NES	size
c1.all	chr5q23	0.00326045	0.0277996	-0.445391	-1.66218	57
c1.all	chr16q24	0.279424	0.520308	0.266121	1.09309	81
c1.all	chr8q24	0.000223464	0.00373935	0.499644	2.24945	143
c1.all	chr13q11	0.641539	0.816917	0.317861	0.868657	14
c1.all	chr7p21	0.0888889	0.274286	0.383264	1.32793	35
c1.all	chr10q23	0.00620184	0.0422252	-0.386771	-1.54781	83
c1.all	chr13q13	0.0252586	0.113663	-0.49659	-1.58008	27
c1.all	chr10q21	0.658379	0.820442	-0.250583	-0.88209	43
c1.all	chr1p13	0.0192343	0.0989194	-0.339004	-1.41052	104
c1.all	chrxp21	0.0542097	0.199271	-0.448156	-1.44842	29
c1.all	chr4q12	0.0963979	0.284163	0.375103	1.31687	37
c1.all	chr6q13	0.683465	0.823544	-0.306456	-0.838791	15
c1.all	chr2p22	0.398354	0.645333	0.286443	1.03179	42
c1.all	chr18q23	0.24985	0.479003	-0.396587	-1.16657	20
c1.all	chr8p11	0.594753	0.787282	-0.260433	-0.916765	43
c1.all	chr1p11	0.164323	0.38029	0.698946	1.2753	4
c1.all	chr9p12	0.19065	0.420207	-0.4541	-1.2429	15
c1.all	chr20p12	0.77164	0.878905	-0.233954	-0.816831	41
c1.all	chr7p13	0.0286768	0.123884	0.427787	1.49081	36
c1.all	chr4p16	0.92535	0.943719	0.181874	0.78795	111
c1.all	chr8q22	0.222993	0.454401	0.286879	1.14142	68
c1.all	chr14q11	0.650508	0.816917	-0.210877	-0.921476	142
c1.all	chryp11	0.858272	0.924511	0.251657	0.725808	17
c1.all	chr10q25	0.0708692	0.227343	-0.39078	-1.37561	43
c1.all	chr11q	0.213831	0.444111	-0.567116	-1.25227	7
c1.all	chr4p14	0.87588	0.924511	0.224836	0.727327	26
c1.all	chr15q26	0.511107	0.727799	-0.25252	-0.971765	67
c1.all	chr12q15	0.0481038	0.18336	-0.482381	-1.48838	24
c1.all	chr4p12	0.712662	0.843523	-0.280939	-0.826384	20
c1.all	chr9q12	0.900405	0.941068	0.352298	0.642802	4
c1.all	chr2q22	0.100486	0.289006	-0.501434	-1.39459	16
c1.all	chr9q33	0.564157	0.769557	-0.257681	-0.936844	50
c1.all	chr18p	0.854277	0.924511	-0.454705	-0.696433	2
c1.all	chr3q28	0.719291	0.847456	-0.273128	-0.824231	22
c1.all	chr12q14	0.367244	0.622968	-0.304946	-1.05021	38
c1.all	chr2q36	0.91621	0.943719	-0.203436	-0.716128	43
c1.all	chr9q22	0.00413301	0.033127	-0.393375	-1.57697	84
c1.all	chr3p22	0.000191865	0.00373935	-0.633311	-2.3465	55
c1.all	chrxq	0.796621	0.890018	-0.485122	-0.743021	2
c1.all	chr6p11	0.671045	0.823365	-0.376792	-0.832006	7
c1.all	chr12q24	0.772792	0.878905	-0.192465	-0.889462	220
c1.all	chr2q32	0.449687	0.685501	-0.284178	-1.00035	43
c1.all	chr4q35	0.00253017	0.0239966	-0.512874	-1.77476	39
c1.all	chr3p14	0.000583544	0.00700662	-0.547513	-1.9116	41
c1.all	chr22q	0.315152	0.564139	0.548537	1.14212	6
c1.all	chr15q24	0.0747467	0.237431	-0.342348	-1.31603	66
c1.all	chr2p	0.298548	0.546495	0.481562	1.14572	9
c1.all	chr13q31	0.441612	0.681345	0.362984	1.01114	15
c1.all	chr12q22	0.587311	0.783081	-0.286981	-0.913131	27
c1.all	chr7p	0.237239	0.474478	0.717585	1.19304	3
c1.all	chr11q22	0.0912402	0.276279	-0.361641	-1.3209	51
c1.all	chrxq28	0.000215936	0.00373935	0.401379	1.69321	94
c1.all	chr16q22	0.15485	0.364679	-0.269555	-1.16904	135
c1.all	chr11q24	0.0308429	0.131488	-0.376963	-1.43059	62
c1.all	chr5q12	0.0219984	0.104816	0.425806	1.50862	39
c1.all	chr10p11	0.00934208	0.0593497	-0.541898	-1.71085	26
c1.all	chr5q21	0.271119	0.510713	-0.361194	-1.14034	26
c1.all	chr14q21	0.872982	0.924511	-0.213914	-0.746864	41
c1.all	chrxq12	0.622951	0.807344	-0.321648	-0.880373	15
c1.all	chr1p35	0.0439845	0.171698	0.316184	1.33219	93
c1.all	chr3p12	0.015466	0.0835165	-0.65701	-1.6925	12
c1.all	chr4q21	0.0407665	0.161077	-0.341309	-1.36825	84
c1.all	chr10p15	0.203228	0.432401	-0.334887	-1.18719	44
c1.all	chr18q21	0.218323	0.447701	-0.295312	-1.14755	70
c1.all	chr1p33	0.551738	0.757471	0.269341	0.948629	38
c1.all	chr11q12	0.514786	0.727799	-0.226806	-0.971529	125
c1.all	chr17q22	0.100795	0.289006	-0.419674	-1.34627	28
c1.all	chr1p31	0.000187935	0.00373935	-0.456997	-1.82885	83
c1.all	chr10p13	0.110379	0.305666	-0.432956	-1.33588	24
c1.all	chr14q13	0.926243	0.943719	-0.210507	-0.675281	28
c1.all	chr2q24	0.22836	0.462429	-0.333064	-1.16287	41
c1.all	chr22q13	0.0501129	0.186627	0.272819	1.26693	175
c1.all	chr15q11	0.348292	0.600248	-0.330389	-1.0678	29
c1.all	chr1q43	0.432896	0.678937	-0.353023	-1.01008	18
c1.all	chr19p	0.208903	0.436674	-0.743236	-1.27095	3
c1.all	chr3q24	0.197982	0.425363	-0.432563	-1.23766	18
c1.all	chr22q11	0.00488889	0.0368372	0.319897	1.45294	149
c1.all	chr7p11	0.00296384	0.0259536	0.655252	1.8253	15
c1.all	chr16q13	0.865785	0.924511	-0.215581	-0.752686	41
c1.all	chr1p22	0.019909	0.100789	-0.375145	-1.46139	71
c1.all	chr12p	0.608267	0.797888	-0.436947	-0.873077	5
c1.all	chr2q11	0.0227415	0.105261	0.387296	1.48167	56
c1.all	chr9p21	0.0132437	0.0772611	-0.508494	-1.65647	30
c1.all	chr4q33	0.371376	0.626696	-0.545417	-1.08981	5
c1.all	chr2p11	0.108741	0.305666	0.341468	1.2746	49
c1.all	chr2q34	0.176459	0.394294	-0.455077	-1.26566	16
c1.all	chr17q23	0.487478	0.717923	-0.256232	-0.984992	66
c1.all	chr14q23	0.0966879	0.284163	0.363085	1.30177	41
c1.all	chr5q33	0.0284506	0.123884	-0.397446	-1.46751	54
c1.all	chr6q27	0.917087	0.943719	0.207682	0.705074	32
c1.all	chr3q26	0.49569	0.720196	-0.260901	-0.977084	58
c1.all	chr10q11	0.0835249	0.260212	-0.345104	-1.30968	62
c1.all	chr5p12	0.155326	0.364679	0.474946	1.29794	14
c1.all	chr1q21	0.00022941	0.00373935	0.436897	2.07653	210
c1.all	chr4q24	0.249039	0.479003	-0.415936	-1.17389	17
c1.all	chr7q31	0.000375799	0.00544003	-0.443562	-1.78252	85
c1.all	chr6p21	0.000242365	0.00373935	0.328642	1.64479	329
c1.all	chr17q	0.606179	0.797888	0.363223	0.894317	10
c1.all	chr5q15	0.418544	0.668022	-0.347978	-1.02358	20
c1.all	chr2q13	0.245469	0.479003	0.349476	1.1626	29
c1.all	chr1q23	0.511543	0.727799	0.239999	0.969227	74
c1.all	chr6q23	0.000193087	0.00373935	-0.608405	-2.19304	48
c1.all	chr11q14	0.756652	0.875554	0.235861	0.828035	37
c1.all	chr5p14	0.122974	0.318749	-0.485826	-1.35118	16
c1.all	chr5q31	0.0568729	0.199332	-0.274365	-1.24978	198
c1.all	chr2p24	0.775866	0.878953	0.224652	0.834293	48
c1.all	chr9p11	0.576066	0.777658	0.371744	0.915297	10
c1.all	chr4q26	0.0585267	0.20173	-0.514889	-1.47321	18
c1.all	chr1q25	0.480335	0.710632	0.24687	0.980696	67
c1.all	chrxq11	0.243453	0.479003	-0.492745	-1.2059	10
c1.all	chr5q14	0.849251	0.924511	-0.218758	-0.763776	41
c1.all	chr4q28	0.43712	0.678937	-0.298897	-1.00941	35
c1.all	chr1q42	0.000212857	0.00373935	0.46823	1.95292	87
c1.all	chr6p25	0.317837	0.56582	-0.316688	-1.09065	38
c1.all	chr13q34	0.77207	0.878905	-0.236934	-0.805445	36
c1.all	chr8q12	0.907	0.943719	0.211156	0.716866	32
c1.all	chr4q22	0.00198807	0.0201292	-0.579116	-1.85774	28
c1.all	chr7q22	0.000437828	0.00591068	0.375245	1.62571	111
c1.all	chr6p23	0.0145661	0.0814529	-0.596557	-1.68366	17
c1.all	chr8p21	0.00505429	0.0372179	-0.392992	-1.55943	78
c1.all	chr5q35	0.312432	0.564139	0.249434	1.06642	103
c1.all	chr13q32	0.453028	0.685892	0.309845	1.00232	26
c1.all	chr12q12	0.106165	0.301732	0.328961	1.2701	59
c1.all	chr3p24	0.119043	0.316147	-0.370702	-1.29428	41
c1.all	chr7q33	0.765105	0.878905	-0.268377	-0.789434	20
c1.all	chr12p12	0.0594002	0.202586	-0.369932	-1.36592	54
c1.all	chr9p23	0.139752	0.340447	-0.782187	-1.33755	3
c1.all	chr7p14	0.396396	0.645333	0.282131	1.03429	45
c1.all	chr6q21	0.00998272	0.0622	-0.420934	-1.56465	56
c1.all	chryq11	0.710867	0.843523	-0.281346	-0.827583	20
c1.all	chr15q13	0.395012	0.645333	0.314341	1.03687	28
c1.all	chr3q22	0.437074	0.678937	-0.288907	-1.0087	41
c1.all	chr6q15	0.0226675	0.105261	-0.601588	-1.64659	15
c1.all	chr4q31	0.0157585	0.0837009	-0.387737	-1.50246	69
c1.all	chr3q12	0.850895	0.924511	-0.232708	-0.746502	28
c1.all	chr13q22	0.00343921	0.0285719	-0.645344	-1.82135	17
c1.all	chr15q15	0.382709	0.632641	-0.264077	-1.03486	73
c1.all	chr3p26	0.00259222	0.0239966	-0.628053	-1.84742	20
c1.all	chr17q12	0.126178	0.322339	0.287904	1.20916	90
c1.all	chr11p12	0.437956	0.678937	-0.384106	-1.01023	13
c1.all	chr7p12	0.379749	0.630968	0.356448	1.05916	19
c1.all	chr6q	0.645067	0.816917	0.449062	0.878618	5
c1.all	chrxq21	0.15765	0.367471	-0.358109	-1.24556	40
c1.all	chr16p12	0.545923	0.752676	0.234323	0.953808	78
c1.all	chr1q32	0.0211534	0.104036	0.304276	1.36755	141
c1.all	chr8p23	0.000386175	0.00544003	-0.512761	-1.84828	48
c1.all	chrxq23	0.687804	0.825365	-0.300653	-0.836177	16
c1.all	chr2p15	0.374234	0.628248	0.382177	1.06461	15
c1.all	chr18q12	0.611176	0.798472	-0.255402	-0.908151	45
c1.all	chr17p13	0.00053286	0.00690586	-0.361507	-1.66419	215
c1.all	chr14q	0.130045	0.326624	0.611077	1.34305	7
c1.all	chr11p14	0.644112	0.816917	-0.283878	-0.8759	24
c1.all	chr1q	0.595321	0.787282	0.564349	0.938271	3
c1.all	chr9q32	0.136337	0.337199	-0.391121	-1.28358	31
c1.all	chr20q12	0.854115	0.924511	0.214986	0.783263	44
c1.all	chr14q32	0.8953	0.938761	-0.185802	-0.811011	141
c1.all	chr7p22	0.00419199	0.033127	0.410545	1.6247	66
c1.all	chr5q	0.303663	0.552734	-0.544203	-1.15022	6
c1.all	chr21q21	0.0564824	0.199332	-0.510114	-1.47851	19
c1.all	chr2p13	0.138754	0.340447	0.303781	1.21069	69
c1.all	chr16q12	0.545025	0.752676	0.268255	0.950419	39
c1.all	chr3p	0.248033	0.479003	-0.719189	-1.22983	3
c1.all	chr10q22	0.0378774	0.153403	-0.336182	-1.36751	91
c1.all	chr17p11	0.327455	0.579757	-0.274891	-1.07084	71
c1.all	chr15q22	0.175921	0.394294	-0.295982	-1.17768	80
c1.all	chr10q	0.218291	0.447701	0.725707	1.20654	3
c1.all	chr1q31	0.20419	0.432401	-0.336065	-1.183	43
c1.all	chr10q24	0.636265	0.816917	0.217344	0.925346	100
c1.all	chr13q14	0.000187829	0.00373935	-0.494396	-1.94488	74
c1.all	chr11p	0.662386	0.820531	0.440911	0.86267	5
c1.all	chr14q12	0.869591	0.924511	0.230152	0.728183	24
c1.all	chr4q	0.876002	0.924511	-0.323598	-0.646591	5
c1.all	chr1p34	0.00625559	0.0422252	0.310654	1.41971	156
c1.all	chr2q23	0.910625	0.943719	0.22233	0.686998	22
c1.all	chr6q16	0.936429	0.951106	-0.209506	-0.653586	25
c1.all	chr16q21	0.46922	0.697373	0.32787	0.987761	20
c1.all	chr9q13	0.000608273	0.00703858	-0.758707	-1.99546	13
c1.all	chr15q25	0.855036	0.924511	-0.211379	-0.774655	52
c1.all	chr18q22	0.121845	0.318368	-0.415031	-1.31031	26
c1.all	chr2q21	0.516148	0.727799	-0.269121	-0.961042	46
c1.all	chr3p25	0.0458992	0.17704	-0.34655	-1.36565	75
c1.all	chr20p13	0.207433	0.436417	-0.296329	-1.15436	71
c1.all	chr8q21	0.0620452	0.207244	-0.369785	-1.36005	53
c1.all	chr4p15	0.117464	0.314532	-0.366004	-1.2975	44
c1.all	chr12p11	0.406422	0.651885	-0.307316	-1.0294	34
c1.all	chr9p13	0.921462	0.943719	0.191725	0.745022	61
c1.all	chr2q37	0.0133538	0.0772611	0.329877	1.42915	111
c1.all	chr3q29	0.86537	0.924511	-0.213631	-0.762883	46
c1.all	chr16p	0.0151781	0.0833506	0.801826	1.56882	5
c1.all	chr13q12	0.000189179	0.00373935	-0.508767	-1.98816	72
c1.all	chr3p21	0.000701631	0.00783892	-0.350533	-1.62315	223
c1.all	chr1p12	0.948094	0.959945	-0.223925	-0.588939	13
c1.all	chr4p11	0.836719	0.924511	0.508397	0.763228	2
c1.all	chr10q26	0.493787	0.720196	0.233641	0.98126	90
c1.all	chr13q21	0.500304	0.723653	-0.352085	-0.963683	15
c1.all	chr15q23	0.332345	0.585217	-0.33042	-1.08437	31
c1.all	chr2p21	0.184603	0.409668	-0.349	-1.21388	40
c1.all	chr19q12	0.286391	0.530232	0.429355	1.14922	13
c1.all	chr20p11	0.887544	0.933651	0.201008	0.768989	56
c1.all	chr5q22	0.00776428	0.0503126	-0.578948	-1.74712	22
c1.all	chr4p13	0.347586	0.600248	-0.445576	-1.09046	10
c1.all	chr8q23	0.0969146	0.284163	-0.4461	-1.36507	23
c1.all	chr19p12	0.115191	0.312033	0.383868	1.30322	32
c1.all	chr21q22	0.109897	0.305666	0.26468	1.19543	145
c1.all	chrxq25	0.00582446	0.0410245	0.570235	1.73681	21
c1.all	chr4q34	0.243996	0.479003	-0.414276	-1.18534	18
c1.all	chr11q23	0.459225	0.688838	-0.235029	-0.996623	117
c1.all	chr10p14	0.450653	0.685501	-0.344384	-0.998155	19
c1.all	chr9q34	0.786322	0.887694	-0.191992	-0.882462	212
c1.all	chr15q	0.0213421	0.104036	-0.753875	-1.66466	7
c1.all	chr7q	0.132577	0.330423	0.587205	1.34315	8
c1.all	chr2q33	0.196402	0.425363	0.271534	1.14259	91
c1.all	chr8q	0.957692	0.966642	0.256632	0.564035	7
c1.all	chr22q12	0.73498	0.862802	-0.209707	-0.876998	107
c1.all	chr6p12	0.436571	0.678937	-0.27886	-1.00517	48
c1.all	chr7q21	0.565292	0.769557	0.231103	0.949256	81
c1.all	chr16q23	0.173983	0.394294	0.369893	1.23052	29
c1.all	chr11q25	0.524826	0.732946	-0.322933	-0.949911	20
c1.all	chr5q11	0.113888	0.312033	0.368556	1.2844	36
c1.all	chr21q11	0.176028	0.394294	-0.493669	-1.27172	12
c1.all	chr11q13	0.000235294	0.00373935	0.353263	1.71338	247
c1.all	chr9p	0.314903	0.564139	-0.620014	-1.15597	4
c1.all	chr17q25	0.000223614	0.00373935	0.442252	2.04583	169
c1.all	chr6q25	0.854653	0.924511	-0.211268	-0.777035	53
c1.all	chr10p12	0.011337	0.0693053	-0.477675	-1.63189	37
c1.all	chr7q36	0.516648	0.727799	-0.247489	-0.967138	72
c1.all	chrxp11	0.129111	0.326624	0.258807	1.17548	149
c1.all	chr9q21	0.0215136	0.104036	-0.414686	-1.50766	50
c1.all	chrxp22	0.0660395	0.213968	-0.301304	-1.27566	116
c1.all	chr1p32	0.261492	0.495459	0.272808	1.10895	77
c1.all	chr12q21	0.0258654	0.1148	-0.426136	-1.51067	44
c1.all	chr8p12	0.448492	0.685501	0.2976	1.00196	31
c1.all	chr11q11	0.252331	0.480913	0.432919	1.18309	14
c1.all	chr12q23	0.679197	0.823544	0.224691	0.895485	69
c1.all	chrxq13	0.617862	0.803965	0.239305	0.920567	58
c1.all	chr1p36	0.0496849	0.186627	0.24211	1.21172	329
c1.all	chr2p23	0.0027885	0.0250965	0.380345	1.55474	79
c1.all	chr2q31	0.583226	0.780848	0.22998	0.940091	79
c1.all	chr3p13	0.45677	0.688342	-0.419217	-0.994012	9
c1.all	chr2q	0.012843	0.0770578	0.81137	1.5875	5
c1.all	chrxq27	0.997607	0.997607	-0.152514	-0.448622	20
c1.all	chr3p11	0.12009	0.316336	-0.698029	-1.39475	5
c1.all	chr17q21	0.000236463	0.00373935	0.366997	1.79411	266
c1.all	chr13q33	0.0973522	0.284163	-0.453804	-1.36946	22
c1.all	chr11p15	0.97754	0.983612	-0.167486	-0.781824	242
c1.all	chr1p21	0.357171	0.612293	-0.317526	-1.0636	34
c1.all	chr3q25	0.0345026	0.143318	-0.397879	-1.45326	51
c1.all	chr3q13	0.467078	0.697373	-0.247951	-0.989078	81
c1.all	chr5p13	0.152153	0.364679	-0.342558	-1.23477	48
c1.all	chr14q22	0.0559499	0.199332	0.357134	1.36086	55
c1.all	chr9p22	0.0165975	0.0867354	-0.493188	-1.61855	31
c1.all	chr4q27	0.538129	0.748299	0.359721	0.939714	12
c1.all	chr2p25	0.673431	0.823365	0.235998	0.892764	53
c1.all	chr6p24	0.663516	0.820531	0.264492	0.872438	28
c1.all	chr1p	0.4055	0.651885	-0.474391	-1.04752	7
c1.all	chr2q12	0.235363	0.473649	-0.337279	-1.16156	38
c1.all	chr8q13	0.0333059	0.140144	0.410701	1.4551	39
c1.all	chr2p16	0.568608	0.770833	-0.27118	-0.926436	37
c1.all	chr12q	0.0366694	0.150391	-0.562311	-1.5639	16
c1.all	chr4q25	0.126349	0.322339	-0.38306	-1.29364	35
c1.all	chr20q13	0.000226244	0.00373935	0.427008	1.99278	181
c1.all	chr5q34	0.578443	0.777658	-0.296924	-0.916152	24
c1.all	chr17q24	0.671857	0.823365	-0.251922	-0.871757	39
c1.all	chr2q14	0.00534869	0.0385106	0.463761	1.66273	41
c1.all	chr7q35	0.242418	0.479003	0.372565	1.16294	23
c1.all	chr5q13	0.773111	0.878905	-0.222792	-0.83145	57
c1.all	chr19q	0.71335	0.843523	0.455871	0.831782	4
c1.all	chr5q32	0.750741	0.871829	-0.251413	-0.819003	30
c1.all	chr20q11	0.00436395	0.0336648	0.351815	1.52045	109
c1.all	chr6q24	0.00233554	0.0229307	-0.519329	-1.7971	39
c1.all	chr5p15	0.00128287	0.0135618	0.393975	1.60149	77
c1.all	chr1q22	0.000211193	0.00373935	0.514413	2.05014	69
c1.all	chr6q26	0.0649166	0.212454	-0.581361	-1.49762	12
c1.all	chr6p22	0.00129758	0.0135618	0.376613	1.59979	98
c1.all	chr11q21	0.793355	0.890018	0.234257	0.801153	33
c1.all	chr1q41	0.0386561	0.154625	0.439158	1.47856	31
c1.all	chr15q14	0.52284	0.732946	0.26666	0.96053	42
c1.all	chr8q11	0.677484	0.823544	-0.28681	-0.853326	21
c1.all	chr1q24	0.379639	0.630968	0.280827	1.04291	48
c1.all	chr4q23	0.649413	0.816917	-0.290313	-0.87609	22
c1.all	chrxq26	0.626987	0.809338	0.242316	0.913246	52
c1.all	chr3q23	0.647998	0.816917	0.281494	0.878665	23
c1.all	chr3p23	0.0901506	0.275555	-0.553434	-1.42568	12
c1.all	chr12q13	0.0572157	0.199332	0.256789	1.22805	221
c1.all	chr9q31	0.000193087	0.00373935	-0.560799	-2.02144	48
c1.all	chr2p12	0.514383	0.727799	0.297515	0.962437	26
c1.all	chr1q44	0.194797	0.425363	0.341543	1.19025	36
c1.all	chr7q34	0.835946	0.924511	0.213184	0.799922	51
c1.all	chr2q35	0.741452	0.867258	-0.231173	-0.840471	50
c1.all	chr6q14	0.91875	0.943719	-0.205086	-0.697179	36
c1.all	chr16p13	0.000234028	0.00373935	0.381885	1.85114	245
c1.all	chr18q11	0.296582	0.54598	-0.339627	-1.11459	31
c1.all	chr3q27	0.171184	0.39336	0.319842	1.19749	50
c1.all	chr7q11	0.000214179	0.00373935	0.433032	1.82217	91
c1.all	chr3q21	0.0612207	0.20662	-0.318085	-1.30421	95
c1.all	chr16p11	0.000215564	0.00373935	0.4382	1.8553	96
c1.all	chr12p13	0.00680882	0.0450216	-0.326883	-1.46546	173
c1.all	chr7p15	0.683745	0.823544	-0.225558	-0.890392	76
c1.all	chr3q11	0.364964	0.622359	-0.406674	-1.06958	13
c1.all	chr6q22	0.000191571	0.00373935	-0.516715	-1.96095	62
c1.all	chr7q32	0.0243155	0.110961	0.415439	1.50722	43
c1.all	chr12q11	0.0781506	0.245833	-0.64062	-1.46656	8
c1.all	chr18p11	0.391421	0.643758	-0.269172	-1.03585	67
c1.all	chr17q11	0.0145811	0.0814529	0.334343	1.42659	102
c1.all	chrxq24	0.339638	0.592408	-0.322077	-1.07885	34
c1.all	chr6q12	0.708384	0.843523	-0.31608	-0.814241	12
c1.all	chr3q	0.340086	0.592408	-0.528249	-1.1165	6
c1.all	chr6p	0.653846	0.817939	-0.367579	-0.841491	8
c1.all	chr21p11	0.747796	0.871533	0.625307	0.83373	1
c1.all	chrxq22	0.19824	0.425363	-0.292604	-1.16108	78
c1.all	chr9p24	0.000583885	0.00700662	-0.568496	-1.96724	39
c1.all	chr11p11	0.988994	0.992056	-0.166278	-0.59936	48
c1.all	chr4q13	0.833333	0.924511	-0.220163	-0.78285	45
c1.all	chr16q11	0.0639296	0.211359	0.695094	1.44727	6
c1.all	chr8p22	0.0547381	0.199271	-0.425424	-1.43671	35
c1.all	chr14q24	0.875232	0.924511	-0.195331	-0.804659	98
c1.all	chr1q12	0.277246	0.519235	-0.461375	-1.16287	11
c1.all	chr15q21	0.000187652	0.00373935	-0.447725	-1.78849	82
c1.all	chr11p13	0.494651	0.720196	-0.282179	-0.9718	38
c1.all	chr17p12	0.426028	0.676633	-0.333225	-1.01967	23
c1.all	chr4q32	0.153125	0.364679	-0.369336	-1.25554	36
c1.all	chr4q11	0.793993	0.890018	-0.282959	-0.758328	14
c1.all	chr14q31	0.15447	0.364679	-0.416711	-1.27514	23
c1.all	chr2p14	0.115568	0.312033	-0.408867	-1.32144	29
c2.cgp	NAKAMURA_CANCER_MICROENVIRONMENT_UP	0.07368	0.141393	0.448155	1.40271	24
c2.cgp	NAKAMURA_CANCER_MICROENVIRONMENT_DN	0.000206016	0.00131152	0.706259	2.58751	46
c2.cgp	WEST_ADRENOCORTICAL_TUMOR_MARKERS_UP	0.000395179	0.00194029	0.679456	2.05617	21
c2.cgp	WEST_ADRENOCORTICAL_TUMOR_MARKERS_DN	0.000407997	0.00196499	-0.683259	-2.03119	20
c2.cgp	WINTER_HYPOXIA_UP	0.000214777	0.00131152	0.541484	2.25801	91
c2.cgp	WINTER_HYPOXIA_DN	0.000194515	0.00131152	-0.700852	-2.59083	52
c2.cgp	PARENT_MTOR_SIGNALING_DN	0.720608	0.767553	-0.23951	-0.85413	44
c2.cgp	PYEON_HPV_POSITIVE_TUMORS_UP	0.000214961	0.00131152	0.465307	1.94314	92
c2.cgp	PYEON_HPV_POSITIVE_TUMORS_DN	0.141513	0.231072	-0.559248	-1.33357	9
c2.cgp	NAKAMURA_TUMOR_ZONE_PERIPHERAL_VS_CENTRAL_UP	0.000239578	0.00131152	0.425352	2.07998	283
c2.cgp	PICCALUGA_ANGIOIMMUNOBLASTIC_LYMPHOMA_UP	0.000177148	0.00131152	-0.523763	-2.38861	205
c2.cgp	PICCALUGA_ANGIOIMMUNOBLASTIC_LYMPHOMA_DN	0.000182349	0.00131152	-0.560944	-2.42636	133
c2.cgp	LU_TUMOR_VASCULATURE_UP	0.00904159	0.0258897	0.503815	1.65515	29
c2.cgp	LU_TUMOR_VASCULATURE_DN	0.00348147	0.0117582	-0.682872	-1.81375	13
c2.cgp	KORKOLA_EMBRYONAL_CARCINOMA_UP	0.30915	0.413802	0.308467	1.09129	39
c2.cgp	KORKOLA_EMBRYONAL_CARCINOMA_DN	0.0210979	0.0522257	-0.638116	-1.65957	12
c2.cgp	KORKOLA_TERATOMA_UP	0.00534869	0.0168207	-0.640855	-1.78673	16
c2.cgp	KORKOLA_YOLK_SAC_TUMOR_UP	0.292157	0.398064	0.374464	1.11979	20
c2.cgp	KORKOLA_CHORIOCARCINOMA_UP	0.532141	0.619695	0.462531	0.960563	6
c2.cgp	KORKOLA_CHORIOCARCINOMA_DN	0.00616016	0.0188612	-0.706529	-1.78855	11
c2.cgp	KORKOLA_SEMINOMA_UP	0.60264	0.67326	0.254904	0.916087	42
c2.cgp	KORKOLA_SEMINOMA_DN	0.0415813	0.0904663	-0.599221	-1.55841	12
c2.cgp	WATANABE_RECTAL_CANCER_RADIOTHERAPY_RESPONSIVE_UP	0.206986	0.308077	0.264602	1.13087	106
c2.cgp	WATANABE_RECTAL_CANCER_RADIOTHERAPY_RESPONSIVE_DN	0.0315767	0.0727154	0.33059	1.37512	89
c2.cgp	HOLLMANN_APOPTOSIS_VIA_CD40_UP	0.0829338	0.15435	-0.267552	-1.21702	200
c2.cgp	HOLLMANN_APOPTOSIS_VIA_CD40_DN	0.0561718	0.114515	0.249899	1.21159	261
c2.cgp	LIU_PROSTATE_CANCER_UP	0.000217202	0.00131152	0.479288	2.01039	95
c2.cgp	LIU_PROSTATE_CANCER_DN	0.000162681	0.00131152	-0.604008	-3.00811	477
c2.cgp	LIU_SOX4_TARGETS_UP	0.00311355	0.0107398	-0.358114	-1.54885	135
c2.cgp	LIU_SOX4_TARGETS_DN	0.000243191	0.00131152	0.332897	1.64396	306
c2.cgp	BERTUCCI_MEDULLARY_VS_DUCTAL_BREAST_CANCER_UP	0.0020562	0.00764433	0.313914	1.46906	199
c2.cgp	BERTUCCI_MEDULLARY_VS_DUCTAL_BREAST_CANCER_DN	0.00018044	0.00131152	-0.500341	-2.22568	168
c2.cgp	SCHUETZ_BREAST_CANCER_DUCTAL_INVASIVE_UP	0.00016835	0.00131152	-0.548301	-2.64836	345
c2.cgp	SCHUETZ_BREAST_CANCER_DUCTAL_INVASIVE_DN	0.308397	0.413303	0.260723	1.07499	84
c2.cgp	DAVICIONI_PAX_FOXO1_SIGNATURE_IN_ARMS_UP	0.000777001	0.00337871	-0.480914	-1.81404	58
c2.cgp	DAVICIONI_PAX_FOXO1_SIGNATURE_IN_ARMS_DN	0.182987	0.278958	-0.417989	-1.2426	20
c2.cgp	FOURNIER_ACINAR_DEVELOPMENT_EARLY_UP	0.0335964	0.0765044	-0.511522	-1.54276	21
c2.cgp	FOURNIER_ACINAR_DEVELOPMENT_EARLY_DN	0.60194	0.672708	0.433448	0.900165	6
c2.cgp	FOURNIER_ACINAR_DEVELOPMENT_LATE_UP	0.605749	0.67535	-0.350864	-0.888198	11
c2.cgp	FOURNIER_ACINAR_DEVELOPMENT_LATE_DN	0.000197589	0.00131152	0.766346	2.31912	21
c2.cgp	NAM_FXYD5_TARGETS_DN	0.198944	0.298279	0.42043	1.22369	18
c2.cgp	FRASOR_TAMOXIFEN_RESPONSE_UP	0.0234088	0.0570393	-0.403875	-1.48862	51
c2.cgp	FRASOR_TAMOXIFEN_RESPONSE_DN	0.276306	0.381876	0.465536	1.17049	11
c2.cgp	KIM_RESPONSE_TO_TSA_AND_DECITABINE_UP	0.180543	0.276483	-0.268004	-1.15159	128
c2.cgp	KIM_RESPONSE_TO_TSA_AND_DECITABINE_DN	0.475093	0.568027	0.372231	0.982772	13
c2.cgp	SENGUPTA_NASOPHARYNGEAL_CARCINOMA_UP	0.00024079	0.00131152	0.499293	2.4498	291
c2.cgp	SENGUPTA_NASOPHARYNGEAL_CARCINOMA_DN	0.000168492	0.00131152	-0.428801	-2.06823	340
c2.cgp	WATANABE_COLON_CANCER_MSI_VS_MSS_UP	0.339361	0.443186	0.326903	1.07395	29
c2.cgp	WATANABE_COLON_CANCER_MSI_VS_MSS_DN	0.2994	0.405798	-0.269012	-1.08127	81
c2.cgp	KOBAYASHI_EGFR_SIGNALING_6HR_UP	0.0810359	0.151942	-0.653804	-1.4513	7
c2.cgp	KOBAYASHI_EGFR_SIGNALING_6HR_DN	0.562986	0.644144	-0.32188	-0.92848	18
c2.cgp	SOTIRIOU_BREAST_CANCER_GRADE_1_VS_3_UP	0.000221779	0.00131152	0.845777	3.81965	151
c2.cgp	SOTIRIOU_BREAST_CANCER_GRADE_1_VS_3_DN	0.000194515	0.00131152	-0.670654	-2.4792	52
c2.cgp	GAZDA_DIAMOND_BLACKFAN_ANEMIA_ERYTHROID_UP	0.657638	0.717543	-0.279784	-0.873139	24
c2.cgp	GAZDA_DIAMOND_BLACKFAN_ANEMIA_ERYTHROID_DN	0.468917	0.562082	-0.199485	-0.994256	480
c2.cgp	GAZDA_DIAMOND_BLACKFAN_ANEMIA_MYELOID_UP	0.108333	0.189743	-0.402567	-1.32066	30
c2.cgp	GAZDA_DIAMOND_BLACKFAN_ANEMIA_MYELOID_DN	0.427079	0.523837	-0.297211	-1.01606	36
c2.cgp	GAZDA_DIAMOND_BLACKFAN_ANEMIA_PROGENITOR_UP	0.000197941	0.00131152	-0.61402	-2.12127	38
c2.cgp	GAZDA_DIAMOND_BLACKFAN_ANEMIA_PROGENITOR_DN	0.0101223	0.0284642	0.38672	1.51494	65
c2.cgp	CHEMNITZ_RESPONSE_TO_PROSTAGLANDIN_E2_UP	0.000220459	0.00131152	0.637125	2.86118	144
c2.cgp	CHEMNITZ_RESPONSE_TO_PROSTAGLANDIN_E2_DN	0.000166917	0.00131152	-0.408478	-1.9891	376
c2.cgp	ZERBINI_RESPONSE_TO_SULINDAC_UP	0.00773411	0.0228254	-0.735168	-1.75306	9
c2.cgp	ZERBINI_RESPONSE_TO_SULINDAC_DN	0.00228224	0.00831986	0.83667	1.73756	6
c2.cgp	IGARASHI_ATF4_TARGETS_UP	0.376379	0.475564	0.524681	1.08963	6
c2.cgp	IGARASHI_ATF4_TARGETS_DN	0.221449	0.324821	-0.27705	-1.12871	89
c2.cgp	ZHONG_RESPONSE_TO_AZACITIDINE_AND_TSA_UP	0.00213295	0.00789	-0.3372	-1.51576	180
c2.cgp	ZHONG_RESPONSE_TO_AZACITIDINE_AND_TSA_DN	0.00843704	0.0244801	0.386246	1.53774	70
c2.cgp	DAVICIONI_MOLECULAR_ARMS_VS_ERMS_UP	0.000168719	0.00131152	-0.364887	-1.75588	331
c2.cgp	DAVICIONI_MOLECULAR_ARMS_VS_ERMS_DN	0.00106762	0.00443596	-0.360289	-1.62104	182
c2.cgp	DAVICIONI_TARGETS_OF_PAX_FOXO1_FUSIONS_UP	0.00017301	0.00131152	-0.491927	-2.29935	253
c2.cgp	DAVICIONI_TARGETS_OF_PAX_FOXO1_FUSIONS_DN	0.000381752	0.00189428	-0.475145	-1.84706	68
c2.cgp	DAVICIONI_RHABDOMYOSARCOMA_PAX_FOXO1_FUSION_UP	0.000191718	0.00131152	-0.559118	-2.14314	63
c2.cgp	DAVICIONI_RHABDOMYOSARCOMA_PAX_FOXO1_FUSION_DN	0.74727	0.785462	0.286928	0.79329	15
c2.cgp	SENGUPTA_NASOPHARYNGEAL_CARCINOMA_WITH_LMP1_UP	0.526474	0.614846	-0.199751	-0.97822	397
c2.cgp	SENGUPTA_NASOPHARYNGEAL_CARCINOMA_WITH_LMP1_DN	0.000180505	0.00131152	-0.420224	-1.8704	169
c2.cgp	TURASHVILI_BREAST_NORMAL_DUCTAL_VS_LOBULAR_UP	0.155755	0.247844	-0.310725	-1.2079	68
c2.cgp	TURASHVILI_BREAST_NORMAL_DUCTAL_VS_LOBULAR_DN	0.598389	0.670328	0.408984	0.893253	7
c2.cgp	TURASHVILI_BREAST_DUCTAL_CARCINOMA_VS_DUCTAL_NORMAL_UP	0.000205212	0.00131152	0.625702	2.26966	44
c2.cgp	TURASHVILI_BREAST_DUCTAL_CARCINOMA_VS_DUCTAL_NORMAL_DN	0.000177525	0.00131152	-0.47912	-2.17021	193
c2.cgp	TURASHVILI_BREAST_DUCTAL_CARCINOMA_VS_LOBULAR_NORMAL_UP	0.000212179	0.00131152	0.639518	2.56466	73
c2.cgp	TURASHVILI_BREAST_DUCTAL_CARCINOMA_VS_LOBULAR_NORMAL_DN	0.000190876	0.00131152	-0.705141	-2.74114	68
c2.cgp	TURASHVILI_BREAST_CARCINOMA_DUCTAL_VS_LOBULAR_UP	0.516863	0.606448	0.321273	0.960729	20
c2.cgp	TURASHVILI_BREAST_CARCINOMA_DUCTAL_VS_LOBULAR_DN	0.59482	0.668406	-0.40241	-0.893265	7
c2.cgp	TURASHVILI_BREAST_LOBULAR_CARCINOMA_VS_DUCTAL_NORMAL_UP	0.000419903	0.00199867	0.465964	1.84684	68
c2.cgp	TURASHVILI_BREAST_LOBULAR_CARCINOMA_VS_DUCTAL_NORMAL_DN	0.000373902	0.00188676	-0.456855	-1.86502	90
c2.cgp	TURASHVILI_BREAST_LOBULAR_CARCINOMA_VS_LOBULAR_NORMAL_UP	0.000185632	0.00131152	-0.488588	-2.01104	94
c2.cgp	TURASHVILI_BREAST_LOBULAR_CARCINOMA_VS_LOBULAR_NORMAL_DN	0.000211372	0.00131152	0.556838	2.24017	74
c2.cgp	CHANDRAN_METASTASIS_TOP50_UP	0.0534089	0.10999	0.407348	1.41766	37
c2.cgp	CHANDRAN_METASTASIS_TOP50_DN	0.0393563	0.0866635	-0.400883	-1.43847	45
c2.cgp	WILCOX_RESPONSE_TO_PROGESTERONE_UP	0.00110889	0.00458621	0.35156	1.58769	151
c2.cgp	WILCOX_RESPONSE_TO_PROGESTERONE_DN	0.0214724	0.0530323	-0.385766	-1.47867	63
c2.cgp	FULCHER_INFLAMMATORY_RESPONSE_LECTIN_VS_LPS_DN	0.00016284	0.00131152	-0.489646	-2.42402	448
c2.cgp	GARY_CD5_TARGETS_UP	0.097688	0.17542	-0.232689	-1.15614	468
c2.cgp	GARY_CD5_TARGETS_DN	0.000254907	0.0013273	0.411353	2.10222	430
c2.cgp	ZHOU_INFLAMMATORY_RESPONSE_LIVE_UP	0.000162973	0.00131152	-0.429971	-2.13423	463
c2.cgp	ZHOU_INFLAMMATORY_RESPONSE_LIVE_DN	0.158186	0.250615	-0.229512	-1.11779	379
c2.cgp	SAMOLS_TARGETS_OF_KHSV_MIRNAS_UP	0.1207	0.205775	0.60008	1.36882	8
c2.cgp	SAMOLS_TARGETS_OF_KHSV_MIRNAS_DN	0.108304	0.189743	0.323768	1.25711	61
c2.cgp	HOOI_ST7_TARGETS_UP	0.00673401	0.0203326	-0.376124	-1.53811	91
c2.cgp	HOOI_ST7_TARGETS_DN	0.0598481	0.120442	-0.304608	-1.29548	119
c2.cgp	PRAMOONJAGO_SOX4_TARGETS_UP	0.245283	0.350098	-0.307055	-1.13509	52
c2.cgp	PRAMOONJAGO_SOX4_TARGETS_DN	0.000206911	0.00131152	0.566828	2.12102	51
c2.cgp	PUIFFE_INVASION_INHIBITED_BY_ASCITES_UP	0.000426712	0.0020164	0.435279	1.77638	80
c2.cgp	PUIFFE_INVASION_INHIBITED_BY_ASCITES_DN	0.0283623	0.0669637	-0.309259	-1.34937	145
c2.cgp	PIEPOLI_LGI1_TARGETS_UP	0.263028	0.369301	-0.42422	-1.16576	15
c2.cgp	PIEPOLI_LGI1_TARGETS_DN	0.299447	0.405798	-0.419968	-1.13675	14
c2.cgp	THUM_SYSTOLIC_HEART_FAILURE_UP	0.0001657	0.00131152	-0.438838	-2.15794	414
c2.cgp	THUM_SYSTOLIC_HEART_FAILURE_DN	0.000175193	0.00131152	-0.411679	-1.90072	228
c2.cgp	CASORELLI_ACUTE_PROMYELOCYTIC_LEUKEMIA_UP	0.000179921	0.00131152	-0.517259	-2.30714	172
c2.cgp	CORRE_MULTIPLE_MYELOMA_UP	0.000380156	0.00188922	-0.471497	-1.84741	71
c2.cgp	CORRE_MULTIPLE_MYELOMA_DN	0.00873278	0.0251784	-0.4191	-1.58912	60
c2.cgp	HUTTMANN_B_CLL_POOR_SURVIVAL_UP	0.000171762	0.00131152	-0.345227	-1.62671	271
c2.cgp	HUTTMANN_B_CLL_POOR_SURVIVAL_DN	0.0665629	0.130462	-0.353988	-1.33815	59
c2.cgp	DIAZ_CHRONIC_MEYLOGENOUS_LEUKEMIA_DN	0.000186706	0.00131152	-0.528384	-2.22162	110
c2.cgp	CASORELLI_APL_SECONDARY_VS_DE_NOVO_UP	0.000396825	0.00194546	-0.585447	-2.03168	39
c2.cgp	CASORELLI_APL_SECONDARY_VS_DE_NOVO_DN	0.586623	0.661696	0.381101	0.901849	9
c2.cgp	DEURIG_T_CELL_PROLYMPHOCYTIC_LEUKEMIA_UP	0.000246184	0.00131152	0.36158	1.81849	359
c2.cgp	DEURIG_T_CELL_PROLYMPHOCYTIC_LEUKEMIA_DN	0.000169319	0.00131152	-0.529011	-2.52987	312
c2.cgp	LIU_CMYB_TARGETS_UP	0.301584	0.407175	0.233698	1.0651	163
c2.cgp	LIU_CMYB_TARGETS_DN	0.139307	0.228796	-0.606775	-1.34691	7
c2.cgp	LIU_VMYB_TARGETS_UP	0.0932078	0.168858	-0.289039	-1.24115	127
c2.cgp	LIU_TARGETS_OF_VMYB_VS_CMYB_UP	0.720916	0.767631	-0.280374	-0.821176	19
c2.cgp	LIU_TARGETS_OF_VMYB_VS_CMYB_DN	0.00728777	0.0217436	-0.464112	-1.63905	42
c2.cgp	CHARAFE_BREAST_CANCER_LUMINAL_VS_BASAL_UP	0.0462384	0.0978639	0.236523	1.19195	374
c2.cgp	CHARAFE_BREAST_CANCER_LUMINAL_VS_BASAL_DN	0.000163212	0.00131152	-0.455043	-2.25326	451
c2.cgp	CHARAFE_BREAST_CANCER_LUMINAL_VS_MESENCHYMAL_UP	0.000258264	0.00133416	0.400311	2.05069	444
c2.cgp	CHARAFE_BREAST_CANCER_LUMINAL_VS_MESENCHYMAL_DN	0.000162893	0.00131152	-0.453098	-2.24706	457
c2.cgp	CHARAFE_BREAST_CANCER_BASAL_VS_MESENCHYMAL_UP	0.000655308	0.00291545	0.37892	1.6506	120
c2.cgp	CHARAFE_BREAST_CANCER_BASAL_VS_MESENCHYMAL_DN	0.00409437	0.0133752	-0.46778	-1.70892	49
c2.cgp	DOANE_BREAST_CANCER_CLASSES_UP	0.640373	0.703635	-0.232512	-0.909163	70
c2.cgp	DOANE_BREAST_CANCER_CLASSES_DN	0.0664102	0.130271	0.40854	1.39527	34
c2.cgp	DOANE_RESPONSE_TO_ANDROGEN_UP	0.342322	0.445086	0.226672	1.04541	180
c2.cgp	DOANE_RESPONSE_TO_ANDROGEN_DN	0.00514861	0.0163297	0.286528	1.37262	238
c2.cgp	DOANE_BREAST_CANCER_ESR1_UP	0.341491	0.444443	-0.250011	-1.05381	112
c2.cgp	DOANE_BREAST_CANCER_ESR1_DN	0.0217883	0.05361	0.407821	1.50275	47
c2.cgp	WANG_RESPONSE_TO_ANDROGEN_UP	0.328557	0.432173	-0.333243	-1.0861	29
c2.cgp	WANG_RESPONSE_TO_FORSKOLIN_UP	0.592674	0.666682	-0.294824	-0.908945	23
c2.cgp	WANG_RESPONSE_TO_FORSKOLIN_DN	0.26714	0.372834	-0.495162	-1.18075	9
c2.cgp	TIMOFEEVA_GROWTH_STRESS_VIA_STAT1_DN	0.220774	0.324172	0.429984	1.21095	16
c2.cgp	LAIHO_COLORECTAL_CANCER_SERRATED_UP	0.00909935	0.0260095	-0.351343	-1.48066	111
c2.cgp	LAIHO_COLORECTAL_CANCER_SERRATED_DN	0.0398976	0.0875018	0.336045	1.3714	80
c2.cgp	BORCZUK_MALIGNANT_MESOTHELIOMA_UP	0.000243368	0.00131152	0.547955	2.70186	304
c2.cgp	BORCZUK_MALIGNANT_MESOTHELIOMA_DN	0.00481036	0.0153913	-0.372042	-1.54789	102
c2.cgp	ROY_WOUND_BLOOD_VESSEL_UP	0.0655098	0.128969	-0.37261	-1.36124	49
c2.cgp	ROY_WOUND_BLOOD_VESSEL_DN	0.0369048	0.0823183	0.498624	1.52813	22
c2.cgp	GRABARCZYK_BCL11B_TARGETS_UP	0.00394292	0.0129712	-0.400775	-1.60084	78
c2.cgp	GRABARCZYK_BCL11B_TARGETS_DN	0.0848837	0.156929	-0.35135	-1.31404	55
c2.cgp	NEWMAN_ERCC6_TARGETS_UP	0.0525478	0.108961	-0.457658	-1.45581	26
c2.cgp	NEWMAN_ERCC6_TARGETS_DN	0.0113095	0.0311822	-0.468951	-1.6274	39
c2.cgp	HORIUCHI_WTAP_TARGETS_UP	0.000170648	0.00131152	-0.497515	-2.36853	298
c2.cgp	HORIUCHI_WTAP_TARGETS_DN	0.000243309	0.00131152	0.575927	2.84441	307
c2.cgp	GAL_LEUKEMIC_STEM_CELL_UP	0.0983125	0.176445	-0.28634	-1.23417	130
c2.cgp	GAL_LEUKEMIC_STEM_CELL_DN	0.000468933	0.00219372	0.337331	1.61727	241
c2.cgp	CHOI_ATL_CHRONIC_VS_ACUTE_DN	0.238846	0.343006	-0.416678	-1.18416	17
c2.cgp	BASAKI_YBX1_TARGETS_UP	0.000238663	0.00131152	0.559527	2.74564	289
c2.cgp	BASAKI_YBX1_TARGETS_DN	0.000166639	0.00131152	-0.337758	-1.64433	374
c2.cgp	NOJIMA_SFRP2_TARGETS_UP	0.0442373	0.0947941	-0.442692	-1.46312	31
c2.cgp	NOJIMA_SFRP2_TARGETS_DN	0.702948	0.75663	0.268507	0.849013	25
c2.cgp	WIKMAN_ASBESTOS_LUNG_CANCER_UP	0.0847319	0.156893	-0.49796	-1.41515	17
c2.cgp	WIKMAN_ASBESTOS_LUNG_CANCER_DN	0.123526	0.209182	-0.400556	-1.29389	28
c2.cgp	RODRIGUES_DCC_TARGETS_UP	0.760874	0.795415	0.395616	0.775479	5
c2.cgp	RODRIGUES_DCC_TARGETS_DN	0.000185151	0.00131152	-0.429588	-1.82415	118
c2.cgp	RODRIGUES_NTN1_TARGETS_UP	0.35264	0.455064	-0.379755	-1.07923	17
c2.cgp	RODRIGUES_NTN1_TARGETS_DN	0.0280645	0.0663084	-0.305017	-1.34619	157
c2.cgp	WANG_LMO4_TARGETS_UP	0.0481336	0.101285	0.236287	1.18948	360
c2.cgp	WANG_LMO4_TARGETS_DN	0.187839	0.284498	0.217948	1.09052	345
c2.cgp	WANG_CLIM2_TARGETS_UP	0.28091	0.386815	0.220201	1.06224	253
c2.cgp	WANG_CLIM2_TARGETS_DN	0.557435	0.64008	-0.212727	-0.957363	183
c2.cgp	VECCHI_GASTRIC_CANCER_ADVANCED_VS_EARLY_UP	0.0150511	0.0397232	-0.310283	-1.38614	174
c2.cgp	VECCHI_GASTRIC_CANCER_ADVANCED_VS_EARLY_DN	0.161369	0.254179	0.259192	1.1529	137
c2.cgp	VECCHI_GASTRIC_CANCER_EARLY_UP	0.000251953	0.00131855	0.688606	3.51544	420
c2.cgp	VECCHI_GASTRIC_CANCER_EARLY_DN	0.000168124	0.00131152	-0.622053	-3.01389	358
c2.cgp	BARRIER_COLON_CANCER_RECURRENCE_UP	0.053198	0.109777	0.390747	1.40429	42
c2.cgp	BARRIER_COLON_CANCER_RECURRENCE_DN	0.680131	0.736433	-0.286491	-0.851681	20
c2.cgp	SMIRNOV_CIRCULATING_ENDOTHELIOCYTES_IN_CANCER_UP	0.000181851	0.00131152	-0.503429	-2.22213	158
c2.cgp	SMIRNOV_CIRCULATING_ENDOTHELIOCYTES_IN_CANCER_DN	0.0143551	0.038288	-0.823951	-1.64657	5
c2.cgp	SLEBOS_HEAD_AND_NECK_CANCER_WITH_HPV_UP	0.000213129	0.00131152	0.599085	2.4701	84
c2.cgp	JAEGER_METASTASIS_UP	0.000203791	0.00131152	0.624571	2.2567	43
c2.cgp	JAEGER_METASTASIS_DN	0.0202949	0.0505825	-0.281483	-1.31721	258
c2.cgp	OSMAN_BLADDER_CANCER_UP	0.00851419	0.0246821	-0.269382	-1.32026	402
c2.cgp	OSMAN_BLADDER_CANCER_DN	0.68314	0.739447	-0.191504	-0.933658	383
c2.cgp	GINESTIER_BREAST_CANCER_ZNF217_AMPLIFIED_UP	0.0349254	0.0787086	-0.35141	-1.39968	77
c2.cgp	GINESTIER_BREAST_CANCER_ZNF217_AMPLIFIED_DN	0.000244918	0.00131152	0.417876	2.07865	326
c2.cgp	GINESTIER_BREAST_CANCER_20Q13_AMPLIFICATION_UP	0.832342	0.854824	-0.196915	-0.834679	117
c2.cgp	GINESTIER_BREAST_CANCER_20Q13_AMPLIFICATION_DN	0.00863833	0.0249755	0.304889	1.40106	175
c2.cgp	OSWALD_HEMATOPOIETIC_STEM_CELL_IN_COLLAGEN_GEL_UP	0.000174581	0.00131152	-0.404734	-1.87124	231
c2.cgp	OSWALD_HEMATOPOIETIC_STEM_CELL_IN_COLLAGEN_GEL_DN	0.0661043	0.129905	-0.258869	-1.21914	270
c2.cgp	GARGALOVIC_RESPONSE_TO_OXIDIZED_PHOSPHOLIPIDS_YELLOW_UP	0.0666272	0.130462	-0.419717	-1.39923	32
c2.cgp	GARGALOVIC_RESPONSE_TO_OXIDIZED_PHOSPHOLIPIDS_YELLOW_DN	0.240711	0.345382	0.375859	1.16343	23
c2.cgp	GARGALOVIC_RESPONSE_TO_OXIDIZED_PHOSPHOLIPIDS_TURQUOISE_UP	0.000376648	0.00188676	-0.523795	-2.09576	79
c2.cgp	GARGALOVIC_RESPONSE_TO_OXIDIZED_PHOSPHOLIPIDS_TURQUOISE_DN	0.000205508	0.00131152	0.70086	2.64388	53
c2.cgp	GARGALOVIC_RESPONSE_TO_OXIDIZED_PHOSPHOLIPIDS_RED_UP	0.51036	0.600315	0.334992	0.957298	17
c2.cgp	GARGALOVIC_RESPONSE_TO_OXIDIZED_PHOSPHOLIPIDS_RED_DN	0.00019802	0.00131152	-0.668005	-2.11222	25
c2.cgp	GARGALOVIC_RESPONSE_TO_OXIDIZED_PHOSPHOLIPIDS_MAGENTA_UP	0.00158322	0.00614131	-0.602479	-1.9333	27
c2.cgp	GARGALOVIC_RESPONSE_TO_OXIDIZED_PHOSPHOLIPIDS_MAGENTA_DN	0.802335	0.830527	-0.285768	-0.743207	12
c2.cgp	GARGALOVIC_RESPONSE_TO_OXIDIZED_PHOSPHOLIPIDS_LIGHTYELLOW_UP	0.860986	0.879317	-0.273727	-0.692928	11
c2.cgp	GARGALOVIC_RESPONSE_TO_OXIDIZED_PHOSPHOLIPIDS_LIGHTYELLOW_DN	0.304312	0.409675	-0.448327	-1.13492	11
c2.cgp	GARGALOVIC_RESPONSE_TO_OXIDIZED_PHOSPHOLIPIDS_GREEN_UP	0.163845	0.257213	-0.411812	-1.25652	22
c2.cgp	GARGALOVIC_RESPONSE_TO_OXIDIZED_PHOSPHOLIPIDS_GREEN_DN	0.0290792	0.0682619	0.488447	1.54446	25
c2.cgp	GARGALOVIC_RESPONSE_TO_OXIDIZED_PHOSPHOLIPIDS_BLUE_UP	0.00128205	0.00515026	-0.381648	-1.65063	135
c2.cgp	GARGALOVIC_RESPONSE_TO_OXIDIZED_PHOSPHOLIPIDS_BLUE_DN	0.0674657	0.131709	-0.350975	-1.33712	61
c2.cgp	GARGALOVIC_RESPONSE_TO_OXIDIZED_PHOSPHOLIPIDS_BLACK_UP	0.000197161	0.00131152	-0.585254	-1.98898	35
c2.cgp	GARGALOVIC_RESPONSE_TO_OXIDIZED_PHOSPHOLIPIDS_BLACK_DN	0.745585	0.784195	-0.310527	-0.786087	11
c2.cgp	GARGALOVIC_RESPONSE_TO_OXIDIZED_PHOSPHOLIPIDS_GREY_UP	0.00204666	0.00763123	-0.657112	-1.86745	17
c2.cgp	GARGALOVIC_RESPONSE_TO_OXIDIZED_PHOSPHOLIPIDS_GREY_DN	0.0011383	0.00467033	-0.436722	-1.7244	74
c2.cgp	RUNNE_GENDER_EFFECT_UP	0.0188127	0.0473941	-0.691227	-1.64828	9
c2.cgp	TAKEDA_TARGETS_OF_NUP98_HOXA9_FUSION_6HR_UP	0.000188395	0.00131152	-0.577125	-2.33486	85
c2.cgp	TAKEDA_TARGETS_OF_NUP98_HOXA9_FUSION_6HR_DN	0.000393236	0.00193366	-0.544512	-1.91187	41
c2.cgp	TAKEDA_TARGETS_OF_NUP98_HOXA9_FUSION_3D_UP	0.000177746	0.00131152	-0.420118	-1.88849	180
c2.cgp	TAKEDA_TARGETS_OF_NUP98_HOXA9_FUSION_3D_DN	0.000198373	0.00131152	-0.62756	-2.07411	31
c2.cgp	TAKEDA_TARGETS_OF_NUP98_HOXA9_FUSION_8D_UP	0.000181061	0.00131152	-0.398578	-1.75912	157
c2.cgp	TAKEDA_TARGETS_OF_NUP98_HOXA9_FUSION_8D_DN	0.000177399	0.00131152	-0.544467	-2.48114	203
c2.cgp	TAKEDA_TARGETS_OF_NUP98_HOXA9_FUSION_10D_UP	0.000177525	0.00131152	-0.409725	-1.85588	193
c2.cgp	TAKEDA_TARGETS_OF_NUP98_HOXA9_FUSION_10D_DN	0.00018379	0.00131152	-0.533205	-2.31732	141
c2.cgp	TAKEDA_TARGETS_OF_NUP98_HOXA9_FUSION_16D_UP	0.00161929	0.00625156	-0.347704	-1.55087	172
c2.cgp	TAKEDA_TARGETS_OF_NUP98_HOXA9_FUSION_16D_DN	0.00018315	0.00131152	-0.400907	-1.73393	135
c2.cgp	LOPEZ_MESOTELIOMA_SURVIVAL_TIME_UP	0.000195198	0.00131152	0.851414	2.30299	14
c2.cgp	LOPEZ_MESOTELIOMA_SURVIVAL_TIME_DN	0.0513784	0.106943	-0.686437	-1.52374	7
c2.cgp	BOGNI_TREATMENT_RELATED_MYELOID_LEUKEMIA_UP	0.821891	0.84595	-0.23775	-0.77487	29
c2.cgp	BOGNI_TREATMENT_RELATED_MYELOID_LEUKEMIA_DN	0.511869	0.601657	0.28625	0.962812	32
c2.cgp	BILBAN_B_CLL_LPL_UP	0.121933	0.207019	-0.325255	-1.24672	63
c2.cgp	BILBAN_B_CLL_LPL_DN	0.000196618	0.00131152	-0.594296	-2.08667	41
c2.cgp	HOEBEKE_LYMPHOID_STEM_CELL_UP	0.00279434	0.00978317	-0.397829	-1.63401	93
c2.cgp	HOEBEKE_LYMPHOID_STEM_CELL_DN	0.00131876	0.0052654	-0.418185	-1.69184	85
c2.cgp	PEPPER_CHRONIC_LYMPHOCYTIC_LEUKEMIA_UP	0.00335769	0.0114252	-0.524468	-1.75747	33
c2.cgp	PEPPER_CHRONIC_LYMPHOCYTIC_LEUKEMIA_DN	0.0101194	0.0284642	-0.565425	-1.70533	21
c2.cgp	AKL_HTLV1_INFECTION_UP	0.0288947	0.0679754	0.481224	1.55066	27
c2.cgp	AKL_HTLV1_INFECTION_DN	0.000191498	0.00131152	-0.530611	-2.05596	67
c2.cgp	RHEIN_ALL_GLUCOCORTICOID_THERAPY_UP	0.000188964	0.00131152	-0.593167	-2.35697	76
c2.cgp	RHEIN_ALL_GLUCOCORTICOID_THERAPY_DN	0.000246184	0.00131152	0.460317	2.31656	361
c2.cgp	MULLIGHAN_NPM1_MUTATED_SIGNATURE_1_UP	0.0814315	0.152509	-0.255547	-1.20054	266
c2.cgp	MULLIGHAN_NPM1_MUTATED_SIGNATURE_1_DN	0.00259788	0.00922376	-0.36787	-1.57454	125
c2.cgp	MULLIGHAN_NPM1_MUTATED_SIGNATURE_2_UP	0.596462	0.668788	-0.217195	-0.939476	133
c2.cgp	MULLIGHAN_NPM1_MUTATED_SIGNATURE_2_DN	0.0786092	0.148757	-0.324426	-1.28912	76
c2.cgp	MULLIGHAN_MLL_SIGNATURE_1_UP	0.000166861	0.00131152	-0.348975	-1.70038	377
c2.cgp	MULLIGHAN_MLL_SIGNATURE_1_DN	0.000174459	0.00131152	-0.364132	-1.68785	237
c2.cgp	MULLIGHAN_MLL_SIGNATURE_2_UP	0.0001657	0.00131152	-0.325839	-1.60228	414
c2.cgp	MULLIGHAN_MLL_SIGNATURE_2_DN	0.000860882	0.00367504	-0.320507	-1.51366	277
c2.cgp	MULLIGHAN_NPM1_SIGNATURE_3_UP	0.134898	0.22369	-0.236694	-1.13922	332
c2.cgp	MULLIGHAN_NPM1_SIGNATURE_3_DN	0.000725295	0.00321285	-0.368022	-1.62956	162
c2.cgp	TONKS_TARGETS_OF_RUNX1_RUNX1T1_FUSION_SUSTAINED_IN_GRANULOCYTE_UP	0.729719	0.774483	0.29206	0.807479	15
c2.cgp	TONKS_TARGETS_OF_RUNX1_RUNX1T1_FUSION_SUSTAINED_IN_GRANULOCYTE_DN	0.00417711	0.0135912	-0.811793	-1.80201	7
c2.cgp	TONKS_TARGETS_OF_RUNX1_RUNX1T1_FUSION_HSC_UP	0.000178348	0.00131152	-0.412847	-1.86039	185
c2.cgp	TONKS_TARGETS_OF_RUNX1_RUNX1T1_FUSION_HSC_DN	0.000178444	0.00131152	-0.469024	-2.11329	186
c2.cgp	TONKS_TARGETS_OF_RUNX1_RUNX1T1_FUSION_GRANULOCYTE_UP	0.00136293	0.00539561	-0.475758	-1.7657	53
c2.cgp	TONKS_TARGETS_OF_RUNX1_RUNX1T1_FUSION_GRANULOCYTE_DN	0.00205719	0.00764433	-0.672653	-1.87539	16
c2.cgp	TONKS_TARGETS_OF_RUNX1_RUNX1T1_FUSION_MONOCYTE_UP	0.00137457	0.00542856	0.319203	1.49538	201
c2.cgp	TONKS_TARGETS_OF_RUNX1_RUNX1T1_FUSION_MONOCYTE_DN	0.0226832	0.0555195	-0.399699	-1.48819	54
c2.cgp	TONKS_TARGETS_OF_RUNX1_RUNX1T1_FUSION_ERYTHROCYTE_UP	0.000181061	0.00131152	-0.407882	-1.80019	157
c2.cgp	TONKS_TARGETS_OF_RUNX1_RUNX1T1_FUSION_ERYTHROCYTE_DN	0.0452582	0.0964132	-0.54343	-1.51511	16
c2.cgp	TONKS_TARGETS_OF_RUNX1_RUNX1T1_FUSION_SUSTAINED_IN_MONOCYTE_UP	0.762498	0.796759	0.264874	0.801562	21
c2.cgp	TONKS_TARGETS_OF_RUNX1_RUNX1T1_FUSION_SUSTAINED_IN_MONOCYTE_DN	0.06418	0.127106	-0.643115	-1.48762	8
c2.cgp	TONKS_TARGETS_OF_RUNX1_RUNX1T1_FUSION_SUSTAINDED_IN_ERYTHROCYTE_UP	0.339637	0.443241	-0.299184	-1.06694	44
c2.cgp	LOPEZ_MESOTHELIOMA_SURVIVAL_WORST_VS_BEST_UP	0.155573	0.247674	0.481882	1.30344	14
c2.cgp	LOPEZ_MESOTHELIOMA_SURVIVAL_WORST_VS_BEST_DN	0.942356	0.949031	-0.259866	-0.576846	7
c2.cgp	PAPASPYRIDONOS_UNSTABLE_ATEROSCLEROTIC_PLAQUE_UP	0.000193461	0.00131152	-0.54954	-2.02552	51
c2.cgp	PAPASPYRIDONOS_UNSTABLE_ATEROSCLEROTIC_PLAQUE_DN	0.000196271	0.00131152	-0.738862	-2.62123	43
c2.cgp	DITTMER_PTHLH_TARGETS_UP	0.0051624	0.0163576	0.349921	1.50946	112
c2.cgp	DITTMER_PTHLH_TARGETS_DN	0.18801	0.284626	-0.297916	-1.17101	72
c2.cgp	UDAYAKUMAR_MED1_TARGETS_UP	0.000220556	0.00131152	0.422251	1.87182	134
c2.cgp	UDAYAKUMAR_MED1_TARGETS_DN	0.000174459	0.00131152	-0.430291	-1.99451	237
c2.cgp	ODONNELL_TFRC_TARGETS_UP	0.000164636	0.00131152	-0.355455	-1.75269	428
c2.cgp	ODONNELL_TFRC_TARGETS_DN	0.000220167	0.00131152	0.691063	3.06771	135
c2.cgp	ODONNELL_TARGETS_OF_MYC_AND_TFRC_UP	0.000188608	0.00131152	-0.549367	-2.20863	82
c2.cgp	ODONNELL_TARGETS_OF_MYC_AND_TFRC_DN	0.000206441	0.00131152	0.793705	2.89384	45
c2.cgp	SENESE_HDAC1_TARGETS_UP	0.197161	0.296376	0.211013	1.08198	450
c2.cgp	SENESE_HDAC1_TARGETS_DN	0.000346981	0.00177563	-0.328108	-1.53472	257
c2.cgp	SENESE_HDAC1_AND_HDAC2_TARGETS_UP	0.000869112	0.00370534	-0.327514	-1.5168	234
c2.cgp	SENESE_HDAC1_AND_HDAC2_TARGETS_DN	0.000173974	0.00131152	-0.441307	-2.04118	230
c2.cgp	SENESE_HDAC2_TARGETS_UP	0.219316	0.322611	-0.267967	-1.1295	112
c2.cgp	SENESE_HDAC2_TARGETS_DN	0.000182315	0.00131152	-0.416593	-1.79929	131
c2.cgp	SENESE_HDAC3_TARGETS_UP	0.000487726	0.00226865	-0.283656	-1.41638	495
c2.cgp	LEE_NEURAL_CREST_STEM_CELL_UP	0.00164144	0.00632214	-0.364244	-1.59118	146
c2.cgp	LEE_NEURAL_CREST_STEM_CELL_DN	0.000185151	0.00131152	-0.42523	-1.80564	118
c2.cgp	HUMMEL_BURKITTS_LYMPHOMA_UP	0.32895	0.432516	-0.30306	-1.07515	43
c2.cgp	HUMMEL_BURKITTS_LYMPHOMA_DN	0.00143619	0.00563903	-0.705812	-1.93958	15
c2.cgp	TIEN_INTESTINE_PROBIOTICS_2HR_UP	0.591603	0.666165	0.286425	0.915531	26
c2.cgp	TIEN_INTESTINE_PROBIOTICS_2HR_DN	0.203463	0.30394	-0.281626	-1.14529	88
c2.cgp	TIEN_INTESTINE_PROBIOTICS_6HR_UP	0.739979	0.781315	0.230932	0.850943	47
c2.cgp	TIEN_INTESTINE_PROBIOTICS_6HR_DN	0.0136814	0.0368822	-0.313123	-1.39294	167
c2.cgp	TIEN_INTESTINE_PROBIOTICS_24HR_DN	0.000228728	0.00131152	0.369281	1.73139	202
c2.cgp	ZHOU_INFLAMMATORY_RESPONSE_FIMA_DN	0.00103217	0.0043161	-0.312489	-1.47692	279
c2.cgp	ZHOU_INFLAMMATORY_RESPONSE_LPS_UP	0.000165508	0.00131152	-0.368842	-1.81497	416
c2.cgp	KINSEY_TARGETS_OF_EWSR1_FLII_FUSION_DN	0.000168947	0.00131152	-0.438298	-2.1031	322
c2.cgp	SABATES_COLORECTAL_ADENOMA_SIZE_UP	0.582266	0.658595	-0.296733	-0.914831	23
c2.cgp	SABATES_COLORECTAL_ADENOMA_SIZE_DN	0.066612	0.130462	-0.541098	-1.46462	14
c2.cgp	SABATES_COLORECTAL_ADENOMA_UP	0.00418134	0.0135914	0.333061	1.4845	138
c2.cgp	SABATES_COLORECTAL_ADENOMA_DN	0.000172652	0.00131152	-0.582127	-2.75796	288
c2.cgp	SCIBETTA_KDM5B_TARGETS_UP	0.300333	0.406345	0.377867	1.1177	19
c2.cgp	SCIBETTA_KDM5B_TARGETS_DN	0.0010627	0.00442679	0.418269	1.69505	77
c2.cgp	NAGASHIMA_NRG1_SIGNALING_UP	0.000179179	0.00131152	-0.477114	-2.13144	174
c2.cgp	NAGASHIMA_NRG1_SIGNALING_DN	0.142054	0.231449	-0.33049	-1.23602	55
c2.cgp	NAGASHIMA_EGF_SIGNALING_UP	0.000193648	0.00131152	-0.731103	-2.74885	57
c2.cgp	KIM_WT1_TARGETS_UP	0.00017696	0.00131152	-0.380409	-1.74311	214
c2.cgp	KIM_WT1_TARGETS_DN	0.000258933	0.00133551	0.396689	2.03628	455
c2.cgp	KIM_WT1_TARGETS_8HR_UP	0.000181192	0.00131152	-0.413729	-1.83368	163
c2.cgp	KIM_WT1_TARGETS_8HR_DN	0.217837	0.321012	0.254293	1.11735	126
c2.cgp	KIM_WT1_TARGETS_12HR_UP	0.00417499	0.0135912	-0.343436	-1.51956	161
c2.cgp	KIM_WT1_TARGETS_12HR_DN	0.122164	0.207304	0.246724	1.16165	207
c2.cgp	ELVIDGE_HYPOXIA_UP	0.0149523	0.0395262	-0.311624	-1.38913	171
c2.cgp	ELVIDGE_HYPOXIA_DN	0.000221288	0.00131152	0.419932	1.88837	146
c2.cgp	ELVIDGE_HYPOXIA_BY_DMOG_UP	0.0440205	0.0945776	-0.30502	-1.31468	130
c2.cgp	ELVIDGE_HYPOXIA_BY_DMOG_DN	0.0561266	0.114494	0.350593	1.35272	59
c2.cgp	ELVIDGE_HIF1A_TARGETS_UP	0.0462343	0.0978639	0.344494	1.36203	67
c2.cgp	ELVIDGE_HIF1A_TARGETS_DN	0.238683	0.342923	-0.273888	-1.12003	91
c2.cgp	ELVIDGE_HIF2A_TARGETS_UP	0.535722	0.622902	-0.44589	-0.943302	6
c2.cgp	ELVIDGE_HIF1A_AND_HIF2A_TARGETS_UP	0.0390561	0.0862846	0.406249	1.45057	41
c2.cgp	ELVIDGE_HIF1A_AND_HIF2A_TARGETS_DN	0.0324903	0.0744522	-0.326082	-1.36185	104
c2.cgp	JAATINEN_HEMATOPOIETIC_STEM_CELL_UP	0.0013557	0.00538657	-0.307391	-1.46941	311
c2.cgp	JAATINEN_HEMATOPOIETIC_STEM_CELL_DN	0.0001755	0.00131152	-0.602415	-2.77656	225
c2.cgp	MOROSETTI_FACIOSCAPULOHUMERAL_MUSCULAR_DISTROPHY_UP	0.366789	0.467602	-0.357175	-1.06181	20
c2.cgp	MOROSETTI_FACIOSCAPULOHUMERAL_MUSCULAR_DISTROPHY_DN	0.0083982	0.0244108	-0.67562	-1.75711	12
c2.cgp	GRAHAM_CML_QUIESCENT_VS_CML_DIVIDING_UP	0.0772618	0.146973	-0.457525	-1.41055	23
c2.cgp	GRAHAM_CML_QUIESCENT_VS_CML_DIVIDING_DN	0.0606002	0.121572	0.586855	1.47551	11
c2.cgp	GRAHAM_CML_QUIESCENT_VS_NORMAL_QUIESCENT_UP	0.000212811	0.00131152	0.484133	2.00758	87
c2.cgp	GRAHAM_CML_QUIESCENT_VS_NORMAL_QUIESCENT_DN	0.00019425	0.00131152	-0.584737	-2.10849	46
c2.cgp	GRAHAM_CML_QUIESCENT_VS_NORMAL_DIVIDING_UP	0.00504658	0.0160841	-0.441951	-1.65693	56
c2.cgp	GRAHAM_CML_QUIESCENT_VS_NORMAL_DIVIDING_DN	0.758932	0.794048	-0.307096	-0.777401	11
c2.cgp	GRAHAM_CML_DIVIDING_VS_NORMAL_DIVIDING_UP	0.193938	0.292113	-0.469819	-1.24787	13
c2.cgp	GRAHAM_CML_DIVIDING_VS_NORMAL_DIVIDING_DN	0.428987	0.525059	-0.417389	-1.02689	10
c2.cgp	GRAHAM_CML_DIVIDING_VS_NORMAL_QUIESCENT_UP	0.000228154	0.00131152	0.670873	3.09739	181
c2.cgp	GRAHAM_CML_DIVIDING_VS_NORMAL_QUIESCENT_DN	0.000185632	0.00131152	-0.552093	-2.27243	94
c2.cgp	GRAHAM_NORMAL_QUIESCENT_VS_NORMAL_DIVIDING_UP	0.000190549	0.00131152	-0.559419	-2.16393	66
c2.cgp	GRAHAM_NORMAL_QUIESCENT_VS_NORMAL_DIVIDING_DN	0.000212811	0.00131152	0.774041	3.20975	87
c2.cgp	BIDUS_METASTASIS_UP	0.000229832	0.00131152	0.550836	2.60519	214
c2.cgp	BIDUS_METASTASIS_DN	0.000181061	0.00131152	-0.477206	-2.10614	157
c2.cgp	WAMUNYOKOLI_OVARIAN_CANCER_LMP_UP	0.000236072	0.00131152	0.437958	2.12719	264
c2.cgp	WAMUNYOKOLI_OVARIAN_CANCER_LMP_DN	0.000177683	0.00131152	-0.601209	-2.72824	196
c2.cgp	WAMUNYOKOLI_OVARIAN_CANCER_GRADES_1_2_UP	0.000220167	0.00131152	0.529257	2.34943	135
c2.cgp	WAMUNYOKOLI_OVARIAN_CANCER_GRADES_1_2_DN	0.000190114	0.00131152	-0.711549	-2.74486	65
c2.cgp	MAYBURD_RESPONSE_TO_L663536_UP	0.13261	0.220679	0.388426	1.27607	29
c2.cgp	MAYBURD_RESPONSE_TO_L663536_DN	0.0266419	0.0635441	0.383553	1.45832	55
c2.cgp	WATANABE_ULCERATIVE_COLITIS_WITH_CANCER_UP	0.645399	0.707257	-0.3019	-0.870846	18
c2.cgp	WATANABE_ULCERATIVE_COLITIS_WITH_CANCER_DN	0.0147571	0.0391369	-0.624184	-1.68952	14
c2.cgp	RODRIGUES_THYROID_CARCINOMA_UP	0.298704	0.405295	-0.404353	-1.12736	16
c2.cgp	RODRIGUES_THYROID_CARCINOMA_DN	0.0530489	0.109652	-0.338015	-1.34633	77
c2.cgp	GOZGIT_ESR1_TARGETS_UP	0.000182983	0.00131152	-0.420913	-1.83654	145
c2.cgp	HAHTOLA_SEZARY_SYNDROM_UP	0.118587	0.203027	-0.29715	-1.23027	98
c2.cgp	HAHTOLA_SEZARY_SYNDROM_DN	0.000593824	0.00267363	-0.563222	-1.94577	38
c2.cgp	HAHTOLA_MYCOSIS_FUNGOIDES_SKIN_UP	0.000178571	0.00131152	-0.404074	-1.81017	177
c2.cgp	HAHTOLA_MYCOSIS_FUNGOIDES_SKIN_DN	0.69246	0.747555	-0.26633	-0.854627	27
c2.cgp	HAHTOLA_MYCOSIS_FUNGOIDES_CD4_UP	0.000192864	0.00131152	-0.61471	-2.3481	62
c2.cgp	HAHTOLA_MYCOSIS_FUNGOIDES_CD4_DN	0.611369	0.680687	-0.219951	-0.93087	115
c2.cgp	HAHTOLA_MYCOSIS_FUNGOIDES_UP	0.0595092	0.120046	-0.510622	-1.47292	18
c2.cgp	HAHTOLA_MYCOSIS_FUNGOIDES_DN	0.00143619	0.00563903	-0.709905	-1.95082	15
c2.cgp	PROVENZANI_METASTASIS_UP	0.0239726	0.0581963	0.280489	1.30803	194
c2.cgp	PROVENZANI_METASTASIS_DN	0.168358	0.261784	0.257215	1.14262	136
c2.cgp	PACHER_TARGETS_OF_IGF1_AND_IGF2_UP	0.0807302	0.151456	0.396252	1.36312	35
c2.cgp	LIU_CDX2_TARGETS_UP	0.0193142	0.0484453	-0.45797	-1.56565	36
c2.cgp	LIU_CDX2_TARGETS_DN	0.249279	0.354752	0.530868	1.21094	8
c2.cgp	COLDREN_GEFITINIB_RESISTANCE_UP	0.273657	0.379499	0.265283	1.09379	84
c2.cgp	COLDREN_GEFITINIB_RESISTANCE_DN	0.000232612	0.00131152	0.385237	1.83473	227
c2.cgp	KOKKINAKIS_METHIONINE_DEPRIVATION_48HR_UP	0.153747	0.245844	-0.274036	-1.17673	127
c2.cgp	KOKKINAKIS_METHIONINE_DEPRIVATION_48HR_DN	0.0255059	0.061417	0.366709	1.43088	64
c2.cgp	KOKKINAKIS_METHIONINE_DEPRIVATION_96HR_UP	0.00427668	0.0138463	-0.370501	-1.56942	116
c2.cgp	KOKKINAKIS_METHIONINE_DEPRIVATION_96HR_DN	0.000211775	0.00131152	0.522188	2.1053	75
c2.cgp	PASTURAL_RIZ1_TARGETS_UP	0.370347	0.46994	-0.437709	-1.07688	10
c2.cgp	PASTURAL_RIZ1_TARGETS_DN	0.131307	0.218845	-0.685136	-1.36916	5
c2.cgp	CHOW_RASSF1_TARGETS_UP	0.304176	0.40966	-0.344968	-1.10697	27
c2.cgp	CHOW_RASSF1_TARGETS_DN	0.0146029	0.038854	0.498679	1.62601	28
c2.cgp	ENK_UV_RESPONSE_EPIDERMIS_UP	0.000238663	0.00131152	0.419618	2.0591	289
c2.cgp	ENK_UV_RESPONSE_KERATINOCYTE_DN	0.0599527	0.120569	0.225022	1.16024	483
c2.cgp	LANDIS_BREAST_CANCER_PROGRESSION_UP	0.0101895	0.0286006	0.444523	1.60615	43
c2.cgp	LANDIS_BREAST_CANCER_PROGRESSION_DN	0.000190078	0.00131152	-0.57409	-2.2448	70
c2.cgp	GESERICK_TERT_TARGETS_DN	0.000202388	0.00131152	-0.775316	-2.33836	21
c2.cgp	YEMELYANOV_GR_TARGETS_DN	0.377417	0.475894	-0.434932	-1.07005	10
c2.cgp	LAU_APOPTOSIS_CDKN2A_UP	0.0638166	0.12655	0.354542	1.34802	55
c2.cgp	LAU_APOPTOSIS_CDKN2A_DN	0.0187883	0.0473941	-0.807589	-1.61387	5
c2.cgp	DELYS_THYROID_CANCER_UP	0.00747615	0.0221751	0.251694	1.28903	441
c2.cgp	DELYS_THYROID_CANCER_DN	0.000174856	0.00131152	-0.657	-3.03571	229
c2.cgp	CHIARADONNA_NEOPLASTIC_TRANSFORMATION_KRAS_CDC25_UP	0.129806	0.217332	0.322598	1.23446	57
c2.cgp	CHIARADONNA_NEOPLASTIC_TRANSFORMATION_KRAS_CDC25_DN	0.000193461	0.00131152	-0.535745	-1.97467	51
c2.cgp	CHIARADONNA_NEOPLASTIC_TRANSFORMATION_KRAS_UP	0.000216779	0.00131152	0.50201	2.20532	125
c2.cgp	CHIARADONNA_NEOPLASTIC_TRANSFORMATION_KRAS_DN	0.00018379	0.00131152	-0.541677	-2.35414	141
c2.cgp	CHIARADONNA_NEOPLASTIC_TRANSFORMATION_CDC25_UP	0.0294985	0.0688509	-0.319449	-1.36123	120
c2.cgp	CHIARADONNA_NEOPLASTIC_TRANSFORMATION_CDC25_DN	0.00018205	0.00131152	-0.468358	-2.05422	151
c2.cgp	CASTELLANO_HRAS_TARGETS_UP	0.14264	0.232172	0.669801	1.31293	5
c2.cgp	CASTELLANO_HRAS_TARGETS_DN	0.603652	0.67393	0.432341	0.897866	6
c2.cgp	CASTELLANO_HRAS_AND_NRAS_TARGETS_UP	0.221652	0.324821	0.626564	1.22818	5
c2.cgp	CASTELLANO_HRAS_AND_NRAS_TARGETS_DN	0.0445926	0.0954305	-0.670903	-1.5519	8
c2.cgp	CASTELLANO_NRAS_TARGETS_UP	0.142406	0.231907	0.308364	1.21318	66
c2.cgp	CASTELLANO_NRAS_TARGETS_DN	0.338799	0.442972	-0.405451	-1.09746	14
c2.cgp	CHEBOTAEV_GR_TARGETS_UP	0.000189394	0.00131152	-0.52226	-2.06852	75
c2.cgp	CHEBOTAEV_GR_TARGETS_DN	0.00185943	0.00703742	-0.390393	-1.65368	116
c2.cgp	BERENJENO_ROCK_SIGNALING_NOT_VIA_RHOA_UP	0.576715	0.654812	0.283111	0.923121	28
c2.cgp	BERENJENO_ROCK_SIGNALING_NOT_VIA_RHOA_DN	0.00604878	0.0185898	-0.452425	-1.64498	48
c2.cgp	BERENJENO_TRANSFORMED_BY_RHOA_REVERSIBLY_UP	0.375703	0.475077	-0.465096	-1.07583	8
c2.cgp	BERENJENO_TRANSFORMED_BY_RHOA_REVERSIBLY_DN	0.00219868	0.0080783	-0.573026	-1.85101	28
c2.cgp	LINDGREN_BLADDER_CANCER_CLUSTER_1_UP	0.000185288	0.00131152	-0.470645	-2.00163	119
c2.cgp	LINDGREN_BLADDER_CANCER_CLUSTER_1_DN	0.000248756	0.00131411	0.422578	2.12939	372
c2.cgp	LINDGREN_BLADDER_CANCER_CLUSTER_2A_UP	0.642217	0.704848	-0.370169	-0.856254	8
c2.cgp	LINDGREN_BLADDER_CANCER_CLUSTER_2A_DN	0.000183587	0.00131152	-0.640629	-2.78082	140
c2.cgp	LINDGREN_BLADDER_CANCER_CLUSTER_3_UP	0.000245761	0.00131152	0.559233	2.77762	323
c2.cgp	LINDGREN_BLADDER_CANCER_CLUSTER_3_DN	0.000351	0.00179059	-0.346249	-1.59588	225
c2.cgp	KOINUMA_COLON_CANCER_MSI_UP	0.00389029	0.0128338	0.656288	1.84829	16
c2.cgp	KOINUMA_COLON_CANCER_MSI_DN	0.5468	0.631146	0.408914	0.932759	8
c2.cgp	CREIGHTON_AKT1_SIGNALING_VIA_MTOR_UP	0.00040494	0.00196499	0.599323	2.04685	34
c2.cgp	CREIGHTON_AKT1_SIGNALING_VIA_MTOR_DN	0.00019976	0.00131152	0.718375	2.22366	23
c2.cgp	NADERI_BREAST_CANCER_PROGNOSIS_UP	0.00020555	0.00131152	0.704349	2.59541	47
c2.cgp	NADERI_BREAST_CANCER_PROGNOSIS_DN	0.00634466	0.0193674	-0.622211	-1.76826	17
c2.cgp	MARKEY_RB1_CHRONIC_LOF_UP	0.00151943	0.00592582	0.367672	1.5895	114
c2.cgp	MARKEY_RB1_CHRONIC_LOF_DN	0.00018577	0.00131152	-0.449076	-1.90056	115
c2.cgp	MARKEY_RB1_ACUTE_LOF_UP	0.000233536	0.00131152	0.561848	2.68264	232
c2.cgp	MARKEY_RB1_ACUTE_LOF_DN	0.000175747	0.00131152	-0.412303	-1.89661	220
c2.cgp	CHIN_BREAST_CANCER_COPY_NUMBER_UP	0.000403877	0.00196499	0.633581	2.00336	25
c2.cgp	CHIN_BREAST_CANCER_COPY_NUMBER_DN	0.650625	0.711791	-0.324589	-0.862128	13
c2.cgp	GRAESSMANN_APOPTOSIS_BY_SERUM_DEPRIVATION_DN	0.158282	0.250645	-0.24719	-1.13994	226
c2.cgp	VANHARANTA_UTERINE_FIBROID_UP	0.0744921	0.142617	0.371757	1.3485	44
c2.cgp	VANHARANTA_UTERINE_FIBROID_DN	0.000191498	0.00131152	-0.712318	-2.76002	67
c2.cgp	VANHARANTA_UTERINE_FIBROID_WITH_7Q_DELETION_UP	0.00378629	0.0125906	0.402209	1.58239	66
c2.cgp	VANHARANTA_UTERINE_FIBROID_WITH_7Q_DELETION_DN	0.00571541	0.0177319	-0.496822	-1.69847	36
c2.cgp	LANDIS_ERBB2_BREAST_TUMORS_65_UP	0.14504	0.234328	0.417178	1.27853	22
c2.cgp	LANDIS_ERBB2_BREAST_TUMORS_65_DN	0.000593003	0.00267363	-0.551763	-1.89826	37
c2.cgp	LANDIS_ERBB2_BREAST_PRENEOPLASTIC_UP	0.378008	0.476334	0.356309	1.05393	19
c2.cgp	LANDIS_ERBB2_BREAST_PRENEOPLASTIC_DN	0.0100775	0.0284082	-0.427011	-1.597	55
c2.cgp	CONCANNON_APOPTOSIS_BY_EPOXOMICIN_UP	0.00645499	0.0196352	-0.303857	-1.40846	237
c2.cgp	CONCANNON_APOPTOSIS_BY_EPOXOMICIN_DN	0.000224871	0.00131152	0.369006	1.69016	170
c2.cgp	ODONNELL_METASTASIS_UP	0.133898	0.22237	-0.303678	-1.21505	79
c2.cgp	ODONNELL_METASTASIS_DN	0.304758	0.410107	0.353515	1.10649	24
c2.cgp	GRAESSMANN_RESPONSE_TO_MC_AND_SERUM_DEPRIVATION_UP	0.000177336	0.00131152	-0.371122	-1.69381	207
c2.cgp	GRAESSMANN_RESPONSE_TO_MC_AND_SERUM_DEPRIVATION_DN	0.235545	0.339813	0.274142	1.11878	80
c2.cgp	GAUSSMANN_MLL_AF4_FUSION_TARGETS_A_UP	0.00639886	0.0194826	-0.31987	-1.44355	187
c2.cgp	GAUSSMANN_MLL_AF4_FUSION_TARGETS_A_DN	0.00715227	0.0214371	-0.378044	-1.53739	88
c2.cgp	GAUSSMANN_MLL_AF4_FUSION_TARGETS_B_UP	0.341276	0.444443	0.340256	1.07588	25
c2.cgp	GAUSSMANN_MLL_AF4_FUSION_TARGETS_B_DN	0.0120859	0.0330717	-0.741151	-1.71439	8
c2.cgp	GAUSSMANN_MLL_AF4_FUSION_TARGETS_C_UP	0.00361011	0.0121326	-0.337358	-1.50156	169
c2.cgp	GAUSSMANN_MLL_AF4_FUSION_TARGETS_C_DN	0.197222	0.296376	0.414635	1.22645	19
c2.cgp	GAUSSMANN_MLL_AF4_FUSION_TARGETS_D_UP	0.0300871	0.0699252	-0.434606	-1.50144	38
c2.cgp	GAUSSMANN_MLL_AF4_FUSION_TARGETS_D_DN	0.430811	0.526439	-0.430137	-1.02569	9
c2.cgp	GAUSSMANN_MLL_AF4_FUSION_TARGETS_E_UP	0.000743771	0.00328223	-0.415229	-1.71693	97
c2.cgp	GAUSSMANN_MLL_AF4_FUSION_TARGETS_E_DN	0.729365	0.774358	0.270992	0.830511	22
c2.cgp	GAUSSMANN_MLL_AF4_FUSION_TARGETS_F_UP	0.000178094	0.00131152	-0.476285	-2.14348	183
c2.cgp	GAUSSMANN_MLL_AF4_FUSION_TARGETS_F_DN	0.04286	0.0925096	-0.435847	-1.46051	33
c2.cgp	GAUSSMANN_MLL_AF4_FUSION_TARGETS_G_UP	0.00403155	0.0132228	-0.312544	-1.44133	226
c2.cgp	GAUSSMANN_MLL_AF4_FUSION_TARGETS_G_DN	0.103891	0.184032	-0.389431	-1.31442	34
c2.cgp	BERENJENO_TRANSFORMED_BY_RHOA_FOREVER_UP	0.00224903	0.00822884	-0.634375	-1.858	19
c2.cgp	BERENJENO_TRANSFORMED_BY_RHOA_FOREVER_DN	0.0222178	0.0545847	-0.475967	-1.57309	31
c2.cgp	CAIRO_PML_TARGETS_BOUND_BY_MYC_UP	0.00479425	0.0153547	0.580659	1.79737	23
c2.cgp	CAIRO_PML_TARGETS_BOUND_BY_MYC_DN	0.103505	0.183495	-0.508403	-1.37613	14
c2.cgp	OUELLET_OVARIAN_CANCER_INVASIVE_VS_LMP_UP	0.000216357	0.00131152	0.530021	2.30323	117
c2.cgp	OUELLET_OVARIAN_CANCER_INVASIVE_VS_LMP_DN	0.463039	0.556464	-0.395262	-1.00059	11
c2.cgp	LANDIS_ERBB2_BREAST_TUMORS_324_UP	0.00110939	0.00458621	0.350769	1.58087	149
c2.cgp	LANDIS_ERBB2_BREAST_TUMORS_324_DN	0.000181752	0.00131152	-0.514162	-2.25053	148
c2.cgp	BARRIER_CANCER_RELAPSE_NORMAL_SAMPLE_UP	0.101567	0.181192	-0.4024	-1.32995	31
c2.cgp	BARRIER_CANCER_RELAPSE_NORMAL_SAMPLE_DN	0.813529	0.83867	-0.236496	-0.78163	31
c2.cgp	BARRIER_CANCER_RELAPSE_TUMOR_SAMPLE_UP	0.033262	0.0759014	0.556953	1.56853	16
c2.cgp	BARRIER_CANCER_RELAPSE_TUMOR_SAMPLE_DN	0.7437	0.783725	0.300821	0.794232	13
c2.cgp	BARIS_THYROID_CANCER_UP	0.448861	0.543018	0.323579	1.0016	23
c2.cgp	BARIS_THYROID_CANCER_DN	0.382639	0.481201	-0.274814	-1.03886	59
c2.cgp	BERENJENO_TRANSFORMED_BY_RHOA_DN	0.000167701	0.00131152	-0.370659	-1.81166	392
c2.cgp	TAKADA_GASTRIC_CANCER_COPY_NUMBER_UP	0.542386	0.627824	0.429014	0.937001	7
c2.cgp	TAKADA_GASTRIC_CANCER_COPY_NUMBER_DN	0.00437811	0.0141607	-0.543315	-1.77076	29
c2.cgp	WANG_BARRETTS_ESOPHAGUS_AND_ESOPHAGUS_CANCER_UP	0.553837	0.636956	0.293927	0.939512	26
c2.cgp	WANG_BARRETTS_ESOPHAGUS_AND_ESOPHAGUS_CANCER_DN	0.0395335	0.0868197	-0.427004	-1.46905	37
c2.cgp	KERLEY_RESPONSE_TO_CISPLATIN_UP	0.00565412	0.0175888	-0.461963	-1.64743	44
c2.cgp	KERLEY_RESPONSE_TO_CISPLATIN_DN	0.907748	0.917852	-0.304168	-0.607842	5
c2.cgp	MISSIAGLIA_REGULATED_BY_METHYLATION_UP	0.453736	0.547901	0.228358	1.00146	124
c2.cgp	MISSIAGLIA_REGULATED_BY_METHYLATION_DN	0.000218436	0.00131152	0.667488	2.90761	120
c2.cgp	TANG_SENESCENCE_TP53_TARGETS_UP	0.000197511	0.00131152	-0.625074	-2.0946	33
c2.cgp	TANG_SENESCENCE_TP53_TARGETS_DN	0.000206186	0.00131152	0.744266	2.84187	56
c2.cgp	WANG_BARRETTS_ESOPHAGUS_UP	0.277854	0.383691	-0.306022	-1.11267	48
c2.cgp	WANG_BARRETTS_ESOPHAGUS_DN	0.059604	0.120089	-0.456235	-1.4426	25
c2.cgp	WANG_ESOPHAGUS_CANCER_VS_NORMAL_UP	0.0157993	0.0411334	-0.335814	-1.42344	117
c2.cgp	WANG_ESOPHAGUS_CANCER_VS_NORMAL_DN	0.237379	0.3415	-0.269004	-1.11801	101
c2.cgp	WANG_ESOPHAGUS_CANCER_PROGRESSION_UP	0.740988	0.782127	-0.338096	-0.782065	8
c2.cgp	SILIGAN_TARGETS_OF_EWS_FLI1_FUSION_UP	0.831903	0.854641	0.262303	0.725209	15
c2.cgp	SILIGAN_TARGETS_OF_EWS_FLI1_FUSION_DN	0.13126	0.218845	0.452438	1.31685	18
c2.cgp	ROYLANCE_BREAST_CANCER_16Q_COPY_NUMBER_UP	0.00966283	0.0273571	0.398889	1.53907	59
c2.cgp	ROYLANCE_BREAST_CANCER_16Q_COPY_NUMBER_DN	0.0553312	0.113154	0.455358	1.43983	25
c2.cgp	JOHANSSON_GLIOMAGENESIS_BY_PDGFB_UP	0.00330442	0.0113028	0.431853	1.64196	55
c2.cgp	JOHANSSON_GLIOMAGENESIS_BY_PDGFB_DN	0.63813	0.702588	-0.291081	-0.877903	21
c2.cgp	MCBRYAN_PUBERTAL_BREAST_3_4WK_UP	0.150194	0.241344	-0.250997	-1.14915	212
c2.cgp	MCBRYAN_PUBERTAL_BREAST_3_4WK_DN	0.535848	0.622902	-0.284524	-0.953428	33
c2.cgp	MCBRYAN_PUBERTAL_BREAST_4_5WK_UP	0.00212465	0.00786817	0.290127	1.40917	264
c2.cgp	MCBRYAN_PUBERTAL_BREAST_4_5WK_DN	0.000177525	0.00131152	-0.428478	-1.94083	193
c2.cgp	MCBRYAN_PUBERTAL_BREAST_5_6WK_UP	0.143281	0.232636	-0.281893	-1.19151	114
c2.cgp	MCBRYAN_PUBERTAL_BREAST_5_6WK_DN	0.00364697	0.0122189	-0.356689	-1.54285	133
c2.cgp	MCBRYAN_PUBERTAL_BREAST_6_7WK_UP	0.000177873	0.00131152	-0.385803	-1.7486	194
c2.cgp	MCBRYAN_PUBERTAL_BREAST_6_7WK_DN	0.10308	0.183055	0.305162	1.23846	78
c2.cgp	VETTER_TARGETS_OF_PRKCA_AND_ETS1_UP	0.41276	0.508755	0.365781	1.03014	16
c2.cgp	VETTER_TARGETS_OF_PRKCA_AND_ETS1_DN	0.00719704	0.0215122	0.632896	1.78241	16
c2.cgp	DUNNE_TARGETS_OF_AML1_MTG8_FUSION_UP	0.000193986	0.00131152	-0.626709	-2.30019	50
c2.cgp	DUNNE_TARGETS_OF_AML1_MTG8_FUSION_DN	0.0723778	0.139467	-0.490708	-1.43721	19
c2.cgp	LUI_THYROID_CANCER_PAX8_PPARG_UP	0.765256	0.79923	-0.232495	-0.829112	44
c2.cgp	LUI_THYROID_CANCER_PAX8_PPARG_DN	0.441015	0.535109	-0.28547	-1.00233	41
c2.cgp	HAMAI_APOPTOSIS_VIA_TRAIL_DN	0.0720967	0.139171	0.263862	1.21824	181
c2.cgp	OUELLET_CULTURED_OVARIAN_CANCER_INVASIVE_VS_LMP_UP	0.000420698	0.00199954	0.446787	1.75777	66
c2.cgp	OUELLET_CULTURED_OVARIAN_CANCER_INVASIVE_VS_LMP_DN	0.753308	0.790285	-0.245285	-0.827891	34
c2.cgp	HUMMERICH_BENIGN_SKIN_TUMOR_UP	0.0370143	0.0824501	-0.533537	-1.53902	18
c2.cgp	HUMMERICH_BENIGN_SKIN_TUMOR_DN	0.0319018	0.0733092	-0.541513	-1.56202	18
c2.cgp	MCBRYAN_PUBERTAL_TGFB1_TARGETS_UP	0.000902527	0.00382784	-0.359056	-1.59814	169
c2.cgp	MCBRYAN_PUBERTAL_TGFB1_TARGETS_DN	0.0111861	0.0309202	-0.407086	-1.55501	62
c2.cgp	HUMMERICH_MALIGNANT_SKIN_TUMOR_UP	0.121871	0.207019	-0.489039	-1.34388	15
c2.cgp	HUMMERICH_MALIGNANT_SKIN_TUMOR_DN	0.0840491	0.155805	-0.489296	-1.4114	18
c2.cgp	LUCAS_HNF4A_TARGETS_UP	0.104957	0.185331	-0.340608	-1.28064	57
c2.cgp	LUCAS_HNF4A_TARGETS_DN	0.699937	0.754134	-0.352165	-0.81461	8
c2.cgp	ZIRN_TRETINOIN_RESPONSE_WT1_UP	0.0202162	0.0504248	-0.524171	-1.61602	23
c2.cgp	ZIRN_TRETINOIN_RESPONSE_WT1_DN	0.334247	0.438422	-0.530616	-1.12255	6
c2.cgp	ZIRN_TRETINOIN_RESPONSE_UP	0.00387597	0.0128307	-0.606182	-1.80206	20
c2.cgp	ZIRN_TRETINOIN_RESPONSE_DN	0.656523	0.716566	0.413034	0.857769	6
c2.cgp	STREICHER_LSM1_TARGETS_UP	0.00974849	0.0275519	-0.451223	-1.60913	44
c2.cgp	STREICHER_LSM1_TARGETS_DN	0.0944592	0.170559	-0.473738	-1.38751	19
c2.cgp	BUSA_SAM68_TARGETS_UP	0.166249	0.259988	-0.589255	-1.30802	7
c2.cgp	BUSA_SAM68_TARGETS_DN	0.560669	0.642393	0.450199	0.934953	6
c2.cgp	KAN_RESPONSE_TO_ARSENIC_TRIOXIDE	0.00870854	0.0251341	-0.34821	-1.48091	119
c2.cgp	LANG_MYB_FAMILY_TARGETS	0.0763512	0.145579	0.420574	1.38169	29
c2.cgp	MCBRYAN_TERMINAL_END_BUD_UP	0.267104	0.372834	-0.447296	-1.1633	12
c2.cgp	MCBRYAN_TERMINAL_END_BUD_DN	0.478279	0.570793	-0.445578	-0.989089	7
c2.cgp	NUNODA_RESPONSE_TO_DASATINIB_IMATINIB_UP	0.0235081	0.0572387	0.474515	1.5589	29
c2.cgp	NUNODA_RESPONSE_TO_DASATINIB_IMATINIB_DN	0.826333	0.849186	0.274986	0.726023	13
c2.cgp	DARWICHE_SKIN_TUMOR_PROMOTER_UP	0.353748	0.455676	-0.240879	-1.04324	136
c2.cgp	DARWICHE_SKIN_TUMOR_PROMOTER_DN	0.408946	0.504844	0.220652	1.01609	178
c2.cgp	DARWICHE_PAPILLOMA_RISK_LOW_UP	0.166555	0.260267	0.253357	1.14586	154
c2.cgp	DARWICHE_PAPILLOMA_RISK_LOW_DN	0.202943	0.303441	-0.255092	-1.12738	160
c2.cgp	DARWICHE_PAPILLOMA_RISK_HIGH_UP	0.376905	0.475677	-0.237216	-1.0297	140
c2.cgp	DARWICHE_PAPILLOMA_RISK_HIGH_DN	0.5327	0.620125	-0.216779	-0.968428	174
c2.cgp	DARWICHE_SQUAMOUS_CELL_CARCINOMA_UP	0.0346281	0.0783592	-0.309075	-1.33997	138
c2.cgp	DARWICHE_SQUAMOUS_CELL_CARCINOMA_DN	0.114836	0.198474	0.255832	1.17703	176
c2.cgp	MAHADEVAN_IMATINIB_RESISTANCE_UP	0.287189	0.39357	-0.372825	-1.12445	21
c2.cgp	MAHADEVAN_IMATINIB_RESISTANCE_DN	0.000408914	0.00196499	-0.710913	-2.08217	19
c2.cgp	TOMIDA_METASTASIS_UP	0.00481831	0.0154016	0.569726	1.78322	24
c2.cgp	TOMIDA_METASTASIS_DN	0.564163	0.644814	0.319129	0.928846	18
c2.cgp	SAENZ_DETOX_PATHWAY_AND_CARCINOGENESIS_DN	0.240016	0.344536	-0.449554	-1.19404	13
c2.cgp	OZANNE_AP1_TARGETS_UP	0.692796	0.747671	-0.295303	-0.839223	17
c2.cgp	OZANNE_AP1_TARGETS_DN	0.0367321	0.0820451	-0.775419	-1.54958	5
c2.cgp	HWANG_PROSTATE_CANCER_MARKERS	0.487977	0.580039	0.304628	0.98161	27
c2.cgp	CORRADETTI_MTOR_PATHWAY_REGULATORS_DN	0.762647	0.796759	0.370801	0.770061	6
c2.cgp	HU_ANGIOGENESIS_UP	0.115667	0.199384	-0.45216	-1.34418	20
c2.cgp	HU_ANGIOGENESIS_DN	0.0441028	0.0946546	0.415532	1.44614	37
c2.cgp	BEGUM_TARGETS_OF_PAX3_FOXO1_FUSION_UP	0.000194062	0.00131152	-0.635243	-2.40868	60
c2.cgp	BEGUM_TARGETS_OF_PAX3_FOXO1_FUSION_DN	0.3829	0.481201	-0.289693	-1.03949	45
c2.cgp	DARWICHE_PAPILLOMA_PROGRESSION_RISK	0.476906	0.569778	-0.252927	-0.988991	70
c2.cgp	SHIRAISHI_PLZF_TARGETS_UP	0.352397	0.454931	0.447146	1.09474	10
c2.cgp	SHIRAISHI_PLZF_TARGETS_DN	0.279034	0.384834	0.496545	1.17504	9
c2.cgp	MOTAMED_RESPONSE_TO_ANDROGEN_UP	0.0516333	0.107405	-0.720653	-1.52458	6
c2.cgp	MOTAMED_RESPONSE_TO_ANDROGEN_DN	0.515279	0.605057	-0.454739	-0.962024	6
c2.cgp	RAMJAUN_APOPTOSIS_BY_TGFB1_VIA_SMAD4_UP	0.639432	0.703635	0.395707	0.864256	7
c2.cgp	RAMJAUN_APOPTOSIS_BY_TGFB1_VIA_SMAD4_DN	0.894484	0.906965	0.281896	0.643022	8
c2.cgp	RAMJAUN_APOPTOSIS_BY_TGFB1_VIA_MAPK1_UP	0.411754	0.507897	0.506915	1.05274	6
c2.cgp	RAMJAUN_APOPTOSIS_BY_TGFB1_VIA_MAPK1_DN	0.047857	0.100833	0.667487	1.52258	8
c2.cgp	OLSSON_E2F3_TARGETS_UP	0.701379	0.755438	-0.263699	-0.851808	28
c2.cgp	OLSSON_E2F3_TARGETS_DN	0.00309023	0.0106706	0.467077	1.71122	46
c2.cgp	MARKS_HDAC_TARGETS_UP	0.630189	0.694781	-0.290634	-0.88678	22
c2.cgp	MARKS_HDAC_TARGETS_DN	0.392746	0.490988	0.378317	1.04596	15
c2.cgp	CHOI_ATL_ACUTE_STAGE	0.931814	0.939572	0.30277	0.593483	5
c2.cgp	CHOI_ATL_STAGE_PREDICTOR	0.168479	0.261848	0.334296	1.21262	44
c2.cgp	WONG_ENDMETRIUM_CANCER_UP	0.0339257	0.0771254	0.482583	1.52591	25
c2.cgp	WONG_ENDMETRIUM_CANCER_DN	0.000188608	0.00131152	-0.74103	-2.97917	82
c2.cgp	WONG_ENDOMETRIAL_CANCER_LATE	0.760242	0.795009	-0.322941	-0.770077	9
c2.cgp	ABDULRAHMAN_KIDNEY_CANCER_VHL_UP	0.408737	0.504844	0.544045	1.06643	5
c2.cgp	ABDULRAHMAN_KIDNEY_CANCER_VHL_DN	0.0569789	0.115623	-0.550952	-1.4913	14
c2.cgp	KONG_E2F1_TARGETS	0.668122	0.725834	-0.344011	-0.846357	10
c2.cgp	KONG_E2F3_TARGETS	0.000216685	0.00131152	0.779299	3.26228	94
c2.cgp	TANAKA_METHYLATED_IN_ESOPHAGEAL_CARCINOMA	0.207486	0.30854	0.268121	1.13302	98
c2.cgp	EGUCHI_CELL_CYCLE_RB1_TARGETS	0.00019976	0.00131152	0.856278	2.65052	23
c2.cgp	CROSBY_E2F4_TARGETS	0.000190186	0.00131152	0.969955	2.01436	6
c2.cgp	MARKS_ACETYLATED_NON_HISTONE_PROTEINS	0.807535	0.834589	0.274446	0.742349	14
c2.cgp	IVANOV_MUTATED_IN_COLON_CANCER	0.403516	0.500948	0.406196	1.04629	12
c2.cgp	TAKAYAMA_BOUND_BY_AR	0.855687	0.875226	-0.281413	-0.692351	10
c2.cgp	RIZ_ERYTHROID_DIFFERENTIATION	0.00021254	0.00131152	0.48145	1.95109	77
c2.cgp	RIZ_ERYTHROID_DIFFERENTIATION_CCNE1	0.103532	0.183495	0.367239	1.3065	40
c2.cgp	RIZ_ERYTHROID_DIFFERENTIATION_HBZ	0.224166	0.327681	0.324277	1.15788	41
c2.cgp	CHASSOT_SKIN_WOUND	0.000415887	0.00198533	-0.857976	-2.11085	10
c2.cgp	LASTOWSKA_NEUROBLASTOMA_COPY_NUMBER_UP	0.000228206	0.00131152	0.452196	2.08233	178
c2.cgp	MUELLER_METHYLATED_IN_GLIOBLASTOMA	0.574401	0.653546	-0.265687	-0.928815	40
c2.cgp	RIZ_ERYTHROID_DIFFERENTIATION_HEMGN	0.223567	0.327098	-0.354118	-1.17038	31
c2.cgp	RIZ_ERYTHROID_DIFFERENTIATION_APOBEC2	0.456608	0.549948	-0.313937	-0.998631	26
c2.cgp	RIZ_ERYTHROID_DIFFERENTIATION_6HR	0.571825	0.651295	-0.268435	-0.93155	39
c2.cgp	RIZ_ERYTHROID_DIFFERENTIATION_12HR	0.0033366	0.0113772	-0.478717	-1.69832	43
c2.cgp	EBAUER_TARGETS_OF_PAX3_FOXO1_FUSION_UP	0.000177336	0.00131152	-0.40921	-1.86764	207
c2.cgp	PEREZ_TP63_TARGETS	0.000167701	0.00131152	-0.427452	-2.06509	344
c2.cgp	PEREZ_TP53_AND_TP63_TARGETS	0.000177588	0.00131152	-0.437797	-1.99141	200
c2.cgp	WAKASUGI_HAVE_ZNF143_BINDING_SITES	0.000206016	0.00131152	0.54701	2.1014	58
c2.cgp	RODRIGUES_NTN1_AND_DCC_TARGETS	0.00276025	0.00969498	-0.523889	-1.78043	35
c2.cgp	DACOSTA_UV_RESPONSE_VIA_ERCC3_XPCS_UP	0.872077	0.888654	-0.228516	-0.73816	28
c2.cgp	DACOSTA_UV_RESPONSE_VIA_ERCC3_XPCS_DN	0.000188218	0.00131152	-0.566614	-2.30425	88
c2.cgp	DACOSTA_UV_RESPONSE_VIA_ERCC3_TTD_UP	0.00484823	0.015467	0.407293	1.58924	64
c2.cgp	DACOSTA_UV_RESPONSE_VIA_ERCC3_TTD_DN	0.000376648	0.00188676	-0.465809	-1.88054	84
c2.cgp	TURJANSKI_MAPK1_AND_MAPK2_TARGETS	0.960444	0.965167	0.225346	0.566582	11
c2.cgp	TURJANSKI_MAPK8_AND_MAPK9_TARGETS	0.430506	0.526264	-0.443345	-1.02552	8
c2.cgp	TURJANSKI_MAPK7_TARGETS	0.100854	0.180412	-0.611308	-1.41404	8
c2.cgp	TURJANSKI_MAPK11_TARGETS	0.26008	0.366105	-0.606542	-1.2121	5
c2.cgp	TURJANSKI_MAPK14_TARGETS	0.742358	0.782563	-0.320638	-0.788855	10
c2.cgp	MAHADEVAN_GIST_MORPHOLOGICAL_SWITCH	0.141773	0.231336	-0.477857	-1.31315	15
c2.cgp	MAHADEVAN_RESPONSE_TO_MP470_DN	0.000408914	0.00196499	-0.704397	-2.06308	19
c2.cgp	MAHADEVAN_RESPONSE_TO_MP470_UP	0.89	0.903539	0.232784	0.696112	20
c2.cgp	APPIERTO_RESPONSE_TO_FENRETINIDE_UP	0.62886	0.693549	-0.259574	-0.896753	38
c2.cgp	APPIERTO_RESPONSE_TO_FENRETINIDE_DN	0.00513031	0.0163033	0.44755	1.66207	49
c2.cgp	NAGY_TFTC_COMPONENTS_HUMAN	0.0534142	0.10999	0.501479	1.48333	19
c2.cgp	NAGY_STAGA_COMPONENTS_HUMAN	0.182917	0.278958	0.456108	1.26103	15
c2.cgp	NAGY_PCAF_COMPONENTS_HUMAN	0.523189	0.612322	0.402528	0.952555	9
c2.cgp	BAKER_HEMATOPOESIS_STAT1_TARGETS	0.588896	0.663573	-0.365812	-0.899994	10
c2.cgp	BAKER_HEMATOPOIESIS_STAT3_TARGETS	0.429488	0.525412	0.361104	1.01697	16
c2.cgp	BAKER_HEMATOPOESIS_STAT5_TARGETS	0.698622	0.752964	-0.365591	-0.811533	7
c2.cgp	SEIDEN_MET_SIGNALING	0.175504	0.271307	0.424171	1.25466	19
c2.cgp	AUNG_GASTRIC_CANCER	0.0302096	0.0701326	0.385012	1.4524	53
c2.cgp	SANCHEZ_MDM2_TARGETS	0.356791	0.458262	-0.393197	-1.08051	15
c2.cgp	BREUHAHN_GROWTH_FACTOR_SIGNALING_IN_LIVER_CANCER	0.295244	0.401148	-0.36718	-1.12034	22
c2.cgp	NAKAMURA_LUNG_CANCER	0.000192197	0.00131152	0.87454	1.99488	8
c2.cgp	GALLUZZI_PERMEABILIZE_MITOCHONDRIA	0.183615	0.279526	0.331604	1.19815	43
c2.cgp	HAEGERSTRAND_RESPONSE_TO_IMATINIB	0.0873746	0.160785	-0.602046	-1.43562	9
c2.cgp	MATHEW_FANCONI_ANEMIA_GENES	0.00194856	0.00734923	0.743932	1.87045	11
c2.cgp	MIDORIKAWA_AMPLIFIED_IN_LIVER_CANCER	0.216884	0.320185	-0.313682	-1.15958	52
c2.cgp	GILMORE_CORE_NFKB_PATHWAY	0.771675	0.804985	-0.285155	-0.771847	14
c2.cgp	SCHEIDEREIT_IKK_TARGETS	0.0765452	0.145864	-0.505203	-1.43574	17
c2.cgp	DUTTA_APOPTOSIS_VIA_NFKB	0.295279	0.401148	-0.33016	-1.10635	33
c2.cgp	DEBOSSCHER_NFKB_TARGETS_REPRESSED_BY_GLUCOCORTICOIDS	0.00260208	0.00922864	-0.591342	-1.82311	23
c2.cgp	ROVERSI_GLIOMA_COPY_NUMBER_DN	0.129868	0.217332	-0.336755	-1.24981	53
c2.cgp	SEIDEN_ONCOGENESIS_BY_MET	0.369162	0.469069	0.250646	1.04091	88
c2.cgp	HUMMERICH_SKIN_CANCER_PROGRESSION_UP	0.064269	0.127106	0.312847	1.2973	87
c2.cgp	HUMMERICH_SKIN_CANCER_PROGRESSION_DN	0.00464684	0.0148972	-0.376949	-1.56066	98
c2.cgp	CAVARD_LIVER_CANCER_MALIGNANT_VS_BENIGN	0.882282	0.896539	0.221576	0.738916	31
c2.cgp	KLEIN_TARGETS_OF_BCR_ABL1_FUSION	0.0612641	0.122557	-0.383557	-1.37629	45
c2.cgp	ROVERSI_GLIOMA_LOH_REGIONS	0.00779879	0.0229335	-0.455913	-1.62585	44
c2.cgp	ROVERSI_GLIOMA_COPY_NUMBER_UP	0.0657724	0.129408	0.303989	1.28459	98
c2.cgp	RASHI_RESPONSE_TO_IONIZING_RADIATION_1	0.0871515	0.160555	-0.371239	-1.32389	44
c2.cgp	RASHI_RESPONSE_TO_IONIZING_RADIATION_2	0.00111338	0.00459196	-0.387464	-1.65841	125
c2.cgp	RASHI_RESPONSE_TO_IONIZING_RADIATION_3	0.0834529	0.155052	0.357044	1.32075	48
c2.cgp	RASHI_RESPONSE_TO_IONIZING_RADIATION_4	0.067023	0.13108	0.343767	1.32638	59
c2.cgp	RASHI_RESPONSE_TO_IONIZING_RADIATION_5	0.237145	0.341464	-0.25358	-1.10643	145
c2.cgp	RASHI_RESPONSE_TO_IONIZING_RADIATION_6	0.261994	0.368165	-0.273855	-1.10452	83
c2.cgp	RASHI_NFKB1_TARGETS	0.115518	0.199233	-0.455106	-1.33294	19
c2.cgp	IWANAGA_E2F1_TARGETS_INDUCED_BY_SERUM	0.000806289	0.00346461	0.570954	1.90403	31
c2.cgp	AIGNER_ZEB1_TARGETS	0.00242964	0.00872111	0.523244	1.78702	34
c2.cgp	SUZUKI_AMPLIFIED_IN_ORAL_CANCER	0.647192	0.708729	-0.312387	-0.87095	16
c2.cgp	HESSON_TUMOR_SUPPRESSOR_CLUSTER_3P21_3	0.0557644	0.113897	-0.679438	-1.50821	7
c2.cgp	MARTIN_INTERACT_WITH_HDAC	0.32014	0.424689	-0.302582	-1.07905	44
c2.cgp	LASTOWSKA_COAMPLIFIED_WITH_MYCN	0.625712	0.691678	0.253226	0.90418	41
c2.cgp	IWANAGA_E2F1_TARGETS_NOT_INDUCED_BY_SERUM	0.590306	0.664933	-0.424924	-0.898947	6
c2.cgp	LI_LUNG_CANCER	0.0371342	0.0826047	0.41014	1.45913	40
c2.cgp	LI_AMPLIFIED_IN_LUNG_CANCER	0.000224871	0.00131152	0.684524	3.13533	170
c2.cgp	LINDGREN_BLADDER_CANCER_CLUSTER_2B	0.000168039	0.00131152	-0.634027	-3.09108	384
c2.cgp	LINDGREN_BLADDER_CANCER_HIGH_RECURRENCE	0.000974849	0.00409737	-0.492348	-1.79867	49
c2.cgp	LINDGREN_BLADDER_CANCER_WITH_LOH_IN_CHR9Q	0.00204537	0.00763123	-0.387959	-1.64337	116
c2.cgp	NAKAMURA_ALVEOLAR_EPITHELIUM	0.00168883	0.00647419	-0.912472	-1.82346	5
c2.cgp	NAKAMURA_BRONCHIAL_AND_BRONCHIOLAR_EPITHELIA	0.0937761	0.169794	-0.641211	-1.42335	7
c2.cgp	NAKAMURA_LUNG_CANCER_DIFFERENTIATION_MARKERS	0.00040992	0.00196499	-0.765122	-2.071	14
c2.cgp	GALLUZZI_PREVENT_MITOCHONDIAL_PERMEABILIZATION	0.176139	0.271942	-0.406639	-1.24073	22
c2.cgp	MYLLYKANGAS_AMPLIFICATION_HOT_SPOT_17	0.206222	0.307405	0.410247	1.21347	19
c2.cgp	MYLLYKANGAS_AMPLIFICATION_HOT_SPOT_24	0.233835	0.338189	0.457441	1.20774	13
c2.cgp	MYLLYKANGAS_AMPLIFICATION_HOT_SPOT_25	0.577999	0.654906	0.383965	0.908626	9
c2.cgp	MYLLYKANGAS_AMPLIFICATION_HOT_SPOT_7	0.0327903	0.074982	-0.716766	-1.59107	7
c2.cgp	MYLLYKANGAS_AMPLIFICATION_HOT_SPOT_27	0.456228	0.549748	-0.40745	-1.00244	10
c2.cgp	MYLLYKANGAS_AMPLIFICATION_HOT_SPOT_15	0.695937	0.750813	0.333494	0.816492	10
c2.cgp	MYLLYKANGAS_AMPLIFICATION_HOT_SPOT_29	0.773078	0.805341	-0.325746	-0.753499	8
c2.cgp	MYLLYKANGAS_AMPLIFICATION_HOT_SPOT_9	0.691811	0.747101	-0.354856	-0.820833	8
c2.cgp	MYLLYKANGAS_AMPLIFICATION_HOT_SPOT_16	0.685895	0.741692	0.347701	0.82281	9
c2.cgp	MYLLYKANGAS_AMPLIFICATION_HOT_SPOT_14	0.14451	0.233847	0.761969	1.27578	3
c2.cgp	EBAUER_TARGETS_OF_PAX3_FOXO1_FUSION_DN	0.153951	0.245961	-0.338178	-1.22959	48
c2.cgp	EBAUER_MYOGENIC_TARGETS_OF_PAX3_FOXO1_FUSION	0.000193986	0.00131152	-0.57805	-2.1216	50
c2.cgp	SCHAVOLT_TARGETS_OF_TP53_AND_TP63	0.452582	0.546911	-0.359633	-1.00267	16
c2.cgp	MYLLYKANGAS_AMPLIFICATION_HOT_SPOT_8	0.00450635	0.0145037	-0.694227	-1.8055	12
c2.cgp	MYLLYKANGAS_AMPLIFICATION_HOT_SPOT_23	0.332856	0.436949	-0.374222	-1.09604	19
c2.cgp	MYLLYKANGAS_AMPLIFICATION_HOT_SPOT_11	0.0369808	0.0824317	0.858138	1.4368	3
c2.cgp	MYLLYKANGAS_AMPLIFICATION_HOT_SPOT_2	0.703704	0.757194	0.420406	0.824072	5
c2.cgp	MYLLYKANGAS_AMPLIFICATION_HOT_SPOT_21	0.0454545	0.0967685	0.720983	1.4973	6
c2.cgp	MYLLYKANGAS_AMPLIFICATION_HOT_SPOT_30	0.581007	0.65763	0.472602	0.926385	5
c2.cgp	MYLLYKANGAS_AMPLIFICATION_HOT_SPOT_3	0.766484	0.800256	0.426505	0.781698	4
c2.cgp	MYLLYKANGAS_AMPLIFICATION_HOT_SPOT_6	0.790796	0.820921	-0.363056	-0.725523	5
c2.cgp	MYLLYKANGAS_AMPLIFICATION_HOT_SPOT_12	0.0214341	0.0530114	0.646917	1.62653	11
c2.cgp	MATTIOLI_MGUS_VS_PCL	0.000432526	0.00203697	0.411093	1.76275	108
c2.cgp	MATTIOLI_MGUS_VS_MULTIPLE_MYELOMA	0.0433768	0.0932558	0.54092	1.52338	16
c2.cgp	FARMER_BREAST_CANCER_APOCRINE_VS_LUMINAL	0.0792899	0.149699	-0.248567	-1.19235	321
c2.cgp	FARMER_BREAST_CANCER_APOCRINE_VS_BASAL	0.00024564	0.00131152	0.293032	1.45648	325
c2.cgp	FARMER_BREAST_CANCER_BASAL_VS_LULMINAL	0.00122549	0.00495342	0.279209	1.3906	330
c2.cgp	MYLLYKANGAS_AMPLIFICATION_HOT_SPOT_5	0.79924	0.828373	0.380709	0.746258	5
c2.cgp	MYLLYKANGAS_AMPLIFICATION_HOT_SPOT_18	0.227992	0.331728	-0.627714	-1.25441	5
c2.cgp	LUI_THYROID_CANCER_CLUSTER_1	0.0733217	0.140871	-0.363924	-1.34137	51
c2.cgp	LUI_THYROID_CANCER_CLUSTER_2	0.0835139	0.155077	-0.378189	-1.33561	42
c2.cgp	LUI_THYROID_CANCER_CLUSTER_3	0.154989	0.247019	0.40066	1.25405	24
c2.cgp	LUI_THYROID_CANCER_CLUSTER_4	0.0892894	0.163481	-0.533398	-1.41673	13
c2.cgp	LUI_THYROID_CANCER_CLUSTER_5	0.584272	0.659727	-0.340844	-0.905301	13
c2.cgp	MYLLYKANGAS_AMPLIFICATION_HOT_SPOT_22	0.855031	0.874828	-0.276319	-0.699491	11
c2.cgp	MYLLYKANGAS_AMPLIFICATION_HOT_SPOT_1	0.804729	0.832741	-0.355456	-0.710335	5
c2.cgp	MYLLYKANGAS_AMPLIFICATION_HOT_SPOT_13	0.56628	0.64633	-0.433702	-0.91752	6
c2.cgp	GRASEMANN_RETINOBLASTOMA_WITH_6P_AMPLIFICATION	0.0173862	0.0445207	0.61931	1.63511	13
c2.cgp	LUI_TARGETS_OF_PAX8_PPARG_FUSION	0.619048	0.686664	-0.274693	-0.901157	30
c2.cgp	SCHLOSSER_SERUM_RESPONSE_UP	0.0479227	0.100906	-0.301759	-1.30458	132
c2.cgp	SCHLOSSER_SERUM_RESPONSE_AUGMENTED_BY_MYC	0.000216403	0.00131152	0.431137	1.84638	107
c2.cgp	SCHLOSSER_MYC_AND_SERUM_RESPONSE_SYNERGY	0.000405762	0.00196499	0.609017	2.04845	32
c2.cgp	SCHLOSSER_MYC_TARGETS_REPRESSED_BY_SERUM	0.000223264	0.00131152	0.506339	2.29731	157
c2.cgp	SCHLOSSER_MYC_TARGETS_AND_SERUM_RESPONSE_DN	0.00020555	0.00131152	0.591744	2.18048	47
c2.cgp	SCHLOSSER_MYC_TARGETS_AND_SERUM_RESPONSE_UP	0.00020555	0.00131152	0.529888	1.95255	47
c2.cgp	MATTIOLI_MULTIPLE_MYELOMA_SUBGROUPS	0.178822	0.275176	0.458469	1.26756	15
c2.cgp	MATTIOLI_MULTIPLE_MYELOMA_WITH_14Q32_TRANSLOCATIONS	0.000197083	0.00131152	-0.605698	-2.07068	36
c2.cgp	FARMER_BREAST_CANCER_CLUSTER_1	0.615702	0.684064	-0.257064	-0.911975	43
c2.cgp	FARMER_BREAST_CANCER_CLUSTER_8	0.0237821	0.0578628	0.728232	1.59052	7
c2.cgp	FARMER_BREAST_CANCER_CLUSTER_7	0.9592	0.96451	-0.201668	-0.59952	20
c2.cgp	FARMER_BREAST_CANCER_CLUSTER_2	0.000202881	0.00131152	0.896652	3.01592	32
c2.cgp	ROSTY_CERVICAL_CANCER_PROLIFERATION_CLUSTER	0.000219539	0.00131152	0.868671	3.88322	140
c2.cgp	SCHEIDEREIT_IKK_INTERACTING_PROTEINS	0.137335	0.226468	-0.327952	-1.23706	58
c2.cgp	JAERVINEN_AMPLIFIED_IN_LARYNGEAL_CANCER	0.0024218	0.0087025	0.493153	1.75446	40
c2.cgp	HEIDENBLAD_AMPLIFIED_IN_SOFT_TISSUE_CANCER	0.801966	0.830517	-0.281681	-0.74816	13
c2.cgp	HEIDENBLAD_AMPLIFIED_IN_BONE_CANCER	0.691791	0.747101	0.378212	0.826046	7
c2.cgp	OHASHI_AURKA_TARGETS	0.0720806	0.139171	0.689484	1.43189	6
c2.cgp	OHASHI_AURKB_TARGETS	0.0132616	0.0358391	0.721813	1.6465	8
c2.cgp	KOBAYASHI_RESPONSE_TO_ROMIDEPSIN	0.0190145	0.0478288	-0.553953	-1.62245	19
c2.cgp	LA_MEN1_TARGETS	0.00119498	0.00485415	-0.604709	-1.88716	24
c2.cgp	KOMMAGANI_TP63_GAMMA_TARGETS	0.705059	0.757904	0.341743	0.808711	9
c2.cgp	LUND_SILENCED_BY_METHYLATION	0.22876	0.332316	-0.427957	-1.19316	16
c2.cgp	HONRADO_BREAST_CANCER_BRCA1_VS_BRCA2	0.000782473	0.00338899	0.673041	1.95893	18
c2.cgp	PATTERSON_DOCETAXEL_RESISTANCE	0.313234	0.417901	-0.336334	-1.09617	29
c2.cgp	BOWIE_RESPONSE_TO_EXTRACELLULAR_MATRIX	0.718174	0.765916	-0.288032	-0.818558	17
c2.cgp	BOWIE_RESPONSE_TO_TAMOXIFEN	0.732311	0.776226	-0.280099	-0.807961	18
c2.cgp	AIYAR_COBRA1_TARGETS_UP	0.116485	0.200372	0.365054	1.29149	39
c2.cgp	AIYAR_COBRA1_TARGETS_DN	0.0160739	0.0417488	0.485356	1.59451	29
c2.cgp	LI_CISPLATIN_RESISTANCE_DN	0.00295741	0.010288	-0.520384	-1.76852	35
c2.cgp	LI_CISPLATIN_RESISTANCE_UP	0.0527683	0.10921	-0.446995	-1.4439	28
c2.cgp	HERNANDEZ_ABERRANT_MITOSIS_BY_DOCETACEL_4NM_UP	0.00745667	0.022151	-0.567439	-1.73136	22
c2.cgp	HERNANDEZ_ABERRANT_MITOSIS_BY_DOCETACEL_4NM_DN	0.337093	0.441624	-0.502809	-1.11613	7
c2.cgp	HERNANDEZ_MITOTIC_ARREST_BY_DOCETAXEL_1_UP	0.000592534	0.00267363	-0.570456	-1.92541	34
c2.cgp	HERNANDEZ_MITOTIC_ARREST_BY_DOCETAXEL_1_DN	0.115354	0.199053	0.369223	1.29512	38
c2.cgp	HERNANDEZ_ABERRANT_MITOSIS_BY_DOCETACEL_2NM_UP	0.000374953	0.00188676	-0.482014	-1.93741	81
c2.cgp	HERNANDEZ_ABERRANT_MITOSIS_BY_DOCETACEL_2NM_DN	0.00178218	0.00678431	-0.595584	-1.88322	25
c2.cgp	HERNANDEZ_MITOTIC_ARREST_BY_DOCETAXEL_2_UP	0.181557	0.277555	-0.307978	-1.1805	63
c2.cgp	HERNANDEZ_MITOTIC_ARREST_BY_DOCETAXEL_2_DN	0.166837	0.260393	-0.429406	-1.25767	19
c2.cgp	XU_HGF_SIGNALING_NOT_VIA_AKT1_6HR	0.226911	0.330913	-0.370258	-1.17779	26
c2.cgp	XU_HGF_TARGETS_INDUCED_BY_AKT1_6HR	0.626492	0.691678	0.300308	0.888286	19
c2.cgp	XU_HGF_SIGNALING_NOT_VIA_AKT1_48HR_UP	0.04653	0.0984172	-0.425366	-1.4456	35
c2.cgp	XU_HGF_SIGNALING_NOT_VIA_AKT1_48HR_DN	0.000588235	0.00266417	0.695259	2.07909	20
c2.cgp	XU_HGF_TARGETS_INDUCED_BY_AKT1_48HR_UP	0.772494	0.804989	-0.28479	-0.770859	14
c2.cgp	XU_HGF_TARGETS_INDUCED_BY_AKT1_48HR_DN	0.0137401	0.0369189	0.510159	1.6439	27
c2.cgp	XU_HGF_TARGETS_REPRESSED_BY_AKT1_UP	0.977542	0.979639	-0.211043	-0.519221	10
c2.cgp	XU_HGF_TARGETS_REPRESSED_BY_AKT1_DN	0.00785634	0.023082	-0.371579	-1.51952	91
c2.cgp	XU_AKT1_TARGETS_6HR	0.642554	0.704848	0.275993	0.889339	27
c2.cgp	XU_AKT1_TARGETS_48HR	0.714674	0.764212	-0.33809	-0.806201	9
c2.cgp	SHI_SPARC_TARGETS_UP	0.0021908	0.00805839	-0.591207	-1.84502	24
c2.cgp	SHI_SPARC_TARGETS_DN	0.14154	0.231072	-0.507515	-1.31991	12
c2.cgp	WAESCH_ANAPHASE_PROMOTING_COMPLEX	0.136133	0.224828	0.519765	1.33882	12
c2.cgp	AGARWAL_AKT_PATHWAY_TARGETS	0.148333	0.239058	0.560716	1.3269	9
c2.cgp	NEBEN_AML_WITH_FLT3_OR_NRAS_UP	0.644802	0.70684	0.394129	0.86081	7
c2.cgp	NEBEN_AML_WITH_FLT3_OR_NRAS_DN	0.0783203	0.148296	0.559178	1.44034	12
c2.cgp	DIRMEIER_LMP1_RESPONSE_EARLY	0.000190186	0.00131152	-0.516909	-1.99147	64
c2.cgp	EINAV_INTERFERON_SIGNATURE_IN_CANCER	0.49337	0.585597	-0.303373	-0.973495	27
c2.cgp	AMUNDSON_DNA_DAMAGE_RESPONSE_TP53	0.0362065	0.0810927	-0.555001	-1.54737	16
c2.cgp	SNIJDERS_AMPLIFIED_IN_HEAD_AND_NECK_TUMORS	0.175331	0.271208	-0.353272	-1.21538	37
c2.cgp	NAISHIRO_CTNNB1_TARGETS_WITH_LEF1_MOTIF	0.39279	0.490988	-0.457785	-1.05892	8
c2.cgp	WHITE_NEUROBLASTOMA_WITH_1P36.3_DELETION	0.398143	0.49635	0.342321	1.03593	21
c2.cgp	BEGUM_TARGETS_OF_PAX3_FOXO1_FUSION_AND_PAX3	0.0637009	0.126474	-0.671831	-1.49132	7
c2.cgp	SILIGAN_BOUND_BY_EWS_FLT1_FUSION	0.00389332	0.0128338	-0.47168	-1.70589	47
c2.cgp	DAUER_STAT3_TARGETS_UP	0.00019497	0.00131152	-0.548128	-2.00245	49
c2.cgp	DAUER_STAT3_TARGETS_DN	0.0477207	0.10061	-0.381126	-1.39884	50
c2.cgp	KORKOLA_EMBRYONAL_CARCINOMA	0.644778	0.70684	0.341752	0.859259	11
c2.cgp	KORKOLA_TERATOMA	0.0258586	0.0620378	0.430446	1.50987	38
c2.cgp	KORKOLA_YOLK_SAC_TUMOR	0.00096432	0.00406357	-0.464065	-1.77266	62
c2.cgp	KORKOLA_CHORIOCARCINOMA	0.809053	0.835629	0.354855	0.736946	6
c2.cgp	WANG_METHYLATED_IN_BREAST_CANCER	0.00276025	0.00969498	-0.5239	-1.78047	35
c2.cgp	HEIDENBLAD_AMPLIFIED_IN_PANCREATIC_CANCER	0.505754	0.596615	-0.29439	-0.965775	30
c2.cgp	TERAMOTO_OPN_TARGETS_CLUSTER_1	0.40897	0.504844	-0.389423	-1.03433	13
c2.cgp	TERAMOTO_OPN_TARGETS_CLUSTER_3	0.684822	0.740776	-0.40958	-0.818495	5
c2.cgp	TERAMOTO_OPN_TARGETS_CLUSTER_4	0.278906	0.38482	0.451193	1.16219	12
c2.cgp	TERAMOTO_OPN_TARGETS_CLUSTER_5	0.776947	0.809113	0.346383	0.756528	7
c2.cgp	TERAMOTO_OPN_TARGETS_CLUSTER_6	0.320602	0.424784	-0.341444	-1.09566	27
c2.cgp	TERAMOTO_OPN_TARGETS_CLUSTER_7	0.0627934	0.125135	0.499892	1.45497	18
c2.cgp	TERAMOTO_OPN_TARGETS_CLUSTER_8	0.425332	0.522085	0.454021	1.03565	8
c2.cgp	SCHRAMM_INHBA_TARGETS_UP	0.903091	0.913992	-0.283966	-0.630344	7
c2.cgp	SCHRAMM_INHBA_TARGETS_DN	0.0021908	0.00805839	-0.590016	-1.8413	24
c2.cgp	SEITZ_NEOPLASTIC_TRANSFORMATION_BY_8P_DELETION_UP	0.0039705	0.0130357	-0.41047	-1.61821	73
c2.cgp	SEITZ_NEOPLASTIC_TRANSFORMATION_BY_8P_DELETION_DN	0.596343	0.668788	0.277807	0.912662	29
c2.cgp	YORDY_RECIPROCAL_REGULATION_BY_ETS1_AND_SP100_DN	0.00792154	0.023211	-0.381515	-1.53381	82
c2.cgp	YORDY_RECIPROCAL_REGULATION_BY_ETS1_AND_SP100_UP	0.373861	0.473664	-0.332932	-1.05272	25
c2.cgp	KANG_GIST_WITH_PDGFRA_UP	0.0042677	0.0138309	-0.465087	-1.707	50
c2.cgp	KANG_GIST_WITH_PDGFRA_DN	0.613105	0.682155	0.460185	0.902046	5
c2.cgp	MEINHOLD_OVARIAN_CANCER_LOW_GRADE_UP	0.113385	0.196799	-0.476112	-1.35306	17
c2.cgp	MEINHOLD_OVARIAN_CANCER_LOW_GRADE_DN	0.0109804	0.0304287	0.575868	1.72207	20
c2.cgp	DACOSTA_ERCC3_ALLELE_XPCS_VS_TTD_UP	0.398377	0.496435	-0.322837	-1.03595	27
c2.cgp	DACOSTA_ERCC3_ALLELE_XPCS_VS_TTD_DN	0.000197083	0.00131152	-0.613139	-2.09611	36
c2.cgp	DACOSTA_LOW_DOSE_UV_RESPONSE_VIA_ERCC3_XPCS_UP	0.785685	0.816653	-0.267125	-0.770537	18
c2.cgp	DACOSTA_LOW_DOSE_UV_RESPONSE_VIA_ERCC3_XPCS_DN	0.325669	0.428891	-0.468802	-1.11789	9
c2.cgp	DACOSTA_UV_RESPONSE_VIA_ERCC3_UP	0.000243132	0.00131152	0.355874	1.75899	309
c2.cgp	DACOSTA_UV_RESPONSE_VIA_ERCC3_COMMON_DN	0.000486539	0.0022682	-0.290177	-1.44644	481
c2.cgp	DIRMEIER_LMP1_RESPONSE_LATE_UP	0.0565453	0.114918	-0.365444	-1.37402	57
c2.cgp	DIRMEIER_LMP1_RESPONSE_LATE_DN	0.734325	0.776879	-0.253188	-0.830608	30
c2.cgp	HEIDENBLAD_AMPLICON_8Q24_UP	0.0645812	0.127448	0.38887	1.38346	40
c2.cgp	HEIDENBLAD_AMPLICON_8Q24_DN	0.180458	0.276483	-0.333309	-1.20187	46
c2.cgp	HEIDENBLAD_AMPLICON_12P11_12_UP	0.114359	0.197859	-0.38711	-1.29719	33
c2.cgp	HEIDENBLAD_AMPLICON_12P11_12_DN	0.879241	0.894282	0.229061	0.724284	25
c2.cgp	AMUNDSON_GENOTOXIC_SIGNATURE	0.0898582	0.164196	0.291544	1.24183	104
c2.cgp	AMUNDSON_RESPONSE_TO_ARSENITE	0.0760927	0.145171	-0.266064	-1.2194	215
c2.cgp	FUNG_IL2_SIGNALING_2	0.496509	0.588256	-0.383754	-0.971457	11
c2.cgp	FUNG_IL2_SIGNALING_1	0.128995	0.216314	0.534379	1.34358	11
c2.cgp	FUNG_IL2_TARGETS_WITH_STAT5_BINDING_SITES_T1	0.289852	0.396145	-0.503307	-1.16422	8
c2.cgp	FUNG_IL2_TARGETS_WITH_STAT5_BINDING_SITES	0.563483	0.644487	0.420463	0.918325	7
c2.cgp	SASAKI_TARGETS_OF_TP73_AND_TP63	0.0459866	0.0977104	-0.645262	-1.53867	9
c2.cgp	YANAGIHARA_ESX1_TARGETS	0.0422619	0.0913998	-0.451302	-1.48054	30
c2.cgp	WEINMANN_ADAPTATION_TO_HYPOXIA_UP	0.109453	0.191121	-0.404407	-1.31803	29
c2.cgp	WEINMANN_ADAPTATION_TO_HYPOXIA_DN	0.105191	0.185431	-0.369401	-1.29703	41
c2.cgp	TSUNODA_CISPLATIN_RESISTANCE_UP	0.138285	0.227575	-0.479713	-1.31825	15
c2.cgp	TSUNODA_CISPLATIN_RESISTANCE_DN	0.0848119	0.156929	-0.36222	-1.32328	49
c2.cgp	MAINA_HYPOXIA_VHL_TARGETS_UP	0.541461	0.627197	0.457825	0.950791	6
c2.cgp	MARTORIATI_MDM4_TARGETS_NEUROEPITHELIUM_UP	0.0546805	0.112033	0.273468	1.2553	172
c2.cgp	MARTORIATI_MDM4_TARGETS_NEUROEPITHELIUM_DN	0.000181521	0.00131152	-0.445569	-1.97145	161
c2.cgp	MARTORIATI_MDM4_TARGETS_FETAL_LIVER_UP	0.0441142	0.0946546	0.262386	1.24771	224
c2.cgp	LI_WILMS_TUMOR_ANAPLASTIC_UP	0.000195656	0.00131152	0.854074	2.52628	19
c2.cgp	LI_WILMS_TUMOR_ANAPLASTIC_DN	0.0569981	0.115623	-0.746055	-1.4909	5
c2.cgp	BORLAK_LIVER_CANCER_EGF_UP	0.312112	0.416915	0.282943	1.08272	57
c2.cgp	MANN_RESPONSE_TO_AMIFOSTINE_UP	0.487352	0.579506	-0.328532	-0.97666	20
c2.cgp	MANN_RESPONSE_TO_AMIFOSTINE_DN	0.0011554	0.0047227	0.785884	1.92407	10
c2.cgp	YAN_ESCAPE_FROM_ANOIKIS	0.51261	0.602312	-0.312603	-0.963759	23
c2.cgp	DARWICHE_PAPILLOMA_RISK_HIGH_VS_LOW_UP	0.587866	0.662641	0.438589	0.910842	6
c2.cgp	DARWICHE_PAPILLOMA_RISK_HIGH_VS_LOW_DN	0.142035	0.231449	-0.38224	-1.26332	31
c2.cgp	OXFORD_RALA_TARGETS_UP	0.0898812	0.164196	0.601859	1.42426	9
c2.cgp	OXFORD_RALA_TARGETS_DN	0.516947	0.606448	-0.38749	-0.953328	10
c2.cgp	OXFORD_RALB_TARGETS_DN	0.000574933	0.00262208	0.807807	1.91162	9
c2.cgp	OXFORD_RALB_TARGETS_UP	0.626172	0.691678	-0.375333	-0.8682	8
c2.cgp	OXFORD_RALA_AND_RALB_TARGETS_UP	0.000192567	0.00131152	0.818614	2.00421	10
c2.cgp	OXFORD_RALA_AND_RALB_TARGETS_DN	0.458988	0.552204	0.425759	1.00753	9
c2.cgp	OXFORD_RALA_OR_RALB_TARGETS_UP	0.000205044	0.00131152	0.833871	3.0846	48
c2.cgp	OXFORD_RALA_OR_RALB_TARGETS_DN	0.392729	0.490988	0.335848	1.03958	23
c2.cgp	LIEN_BREAST_CARCINOMA_METAPLASTIC_VS_DUCTAL_UP	0.011994	0.0328754	-0.370125	-1.4928	83
c2.cgp	LIEN_BREAST_CARCINOMA_METAPLASTIC_VS_DUCTAL_DN	0.0006453	0.00287876	0.381767	1.64684	112
c2.cgp	WOOD_EBV_EBNA1_TARGETS_UP	0.209991	0.312124	0.262817	1.12695	108
c2.cgp	WOOD_EBV_EBNA1_TARGETS_DN	0.0667705	0.130664	-0.374132	-1.3531	47
c2.cgp	MOHANKUMAR_TLX1_TARGETS_UP	0.000249688	0.0013169	0.388788	1.9817	409
c2.cgp	MOHANKUMAR_TLX1_TARGETS_DN	0.000533239	0.00247332	-0.36975	-1.66865	187
c2.cgp	DAIRKEE_TERT_TARGETS_UP	0.000248571	0.00131411	0.312337	1.57362	371
c2.cgp	DAIRKEE_TERT_TARGETS_DN	0.000184366	0.00131152	-0.450136	-1.91811	120
c2.cgp	DAWSON_METHYLATED_IN_LYMPHOMA_TCL1	0.000193648	0.00131152	-0.52689	-1.98104	57
c2.cgp	MURATA_VIRULENCE_OF_H_PILORI	0.192933	0.290733	0.386127	1.20856	24
c2.cgp	WANG_HCP_PROSTATE_CANCER	0.00557828	0.0174555	-0.367569	-1.54485	108
c2.cgp	JOHANSSON_BRAIN_CANCER_EARLY_VS_LATE_UP	0.0489068	0.102648	0.691111	1.50944	7
c2.cgp	JOHANSSON_BRAIN_CANCER_EARLY_VS_LATE_DN	0.00370443	0.0123733	-0.473798	-1.68963	44
c2.cgp	WIEMANN_TELOMERE_SHORTENING_AND_CHRONIC_LIVER_DAMAGE_UP	0.259658	0.365668	0.52528	1.19819	8
c2.cgp	WIEMANN_TELOMERE_SHORTENING_AND_CHRONIC_LIVER_DAMAGE_DN	0.0528978	0.109409	-0.719524	-1.52219	6
c2.cgp	MAINA_VHL_TARGETS_UP	0.0232897	0.0567914	-0.664275	-1.63429	10
c2.cgp	MAINA_VHL_TARGETS_DN	0.665297	0.723486	0.296373	0.862614	18
c2.cgp	GRUETZMANN_PANCREATIC_CANCER_UP	0.00197726	0.00744033	0.269351	1.35239	356
c2.cgp	GRUETZMANN_PANCREATIC_CANCER_DN	0.000887942	0.00377913	-0.358299	-1.6298	200
c2.cgp	JAZAG_TGFB1_SIGNALING_UP	0.0298637	0.0695543	0.31673	1.35642	107
c2.cgp	JAZAG_TGFB1_SIGNALING_DN	0.570358	0.650077	0.271734	0.928044	34
c2.cgp	JAZAG_TGFB1_SIGNALING_VIA_SMAD4_UP	0.405277	0.502537	0.238045	1.02073	108
c2.cgp	JAZAG_TGFB1_SIGNALING_VIA_SMAD4_DN	0.484601	0.576654	-0.254388	-0.981322	65
c2.cgp	LI_WILMS_TUMOR_VS_FETAL_KIDNEY_2_UP	0.000403063	0.00196426	0.646705	2.14078	30
c2.cgp	LI_WILMS_TUMOR_VS_FETAL_KIDNEY_2_DN	0.102341	0.182274	-0.350766	-1.29287	51
c2.cgp	SIMBULAN_UV_RESPONSE_NORMAL_UP	0.0271739	0.0645775	-0.67278	-1.60429	9
c2.cgp	SIMBULAN_UV_RESPONSE_NORMAL_DN	0.0284416	0.0671026	-0.456058	-1.52823	33
c2.cgp	SIMBULAN_UV_RESPONSE_IMMORTALIZED_DN	0.0121008	0.0330849	-0.497739	-1.64505	31
c2.cgp	CEBALLOS_TARGETS_OF_TP53_AND_MYC_UP	0.165756	0.25961	-0.418467	-1.2621	21
c2.cgp	CEBALLOS_TARGETS_OF_TP53_AND_MYC_DN	0.158788	0.251079	0.352557	1.23666	38
c2.cgp	INAMURA_LUNG_CANCER_SCC_UP	0.000780793	0.0033862	0.736594	1.99241	14
c2.cgp	INAMURA_LUNG_CANCER_SCC_DN	0.00020496	0.00131152	-0.9686	-2.62177	14
c2.cgp	INAMURA_LUNG_CANCER_SCC_SUBTYPES_UP	0.0204958	0.050928	0.600362	1.62392	14
c2.cgp	INAMURA_LUNG_CANCER_SCC_SUBTYPES_DN	0.896866	0.908817	0.327457	0.641875	5
c2.cgp	WATTEL_AUTONOMOUS_THYROID_ADENOMA_UP	0.151976	0.243704	0.2989	1.19628	72
c2.cgp	WATTEL_AUTONOMOUS_THYROID_ADENOMA_DN	0.000193798	0.00131152	-0.599987	-2.24393	55
c2.cgp	SASAI_RESISTANCE_TO_NEOPLASTIC_TRANSFROMATION	0.000193986	0.00131152	-0.525259	-1.92785	50
c2.cgp	KIM_MYC_AMPLIFICATION_TARGETS_UP	0.0027416	0.00965021	0.313194	1.46131	195
c2.cgp	KIM_MYC_AMPLIFICATION_TARGETS_DN	0.289141	0.395437	-0.262396	-1.08498	97
c2.cgp	KIM_MYCN_AMPLIFICATION_TARGETS_UP	0.10729	0.188308	-0.303171	-1.24307	92
c2.cgp	KIM_MYCN_AMPLIFICATION_TARGETS_DN	0.0299722	0.0697575	-0.330025	-1.37307	102
c2.cgp	KIM_MYCL1_AMPLIFICATION_TARGETS_UP	0.212574	0.315389	-0.460497	-1.22311	13
c2.cgp	KIM_MYCL1_AMPLIFICATION_TARGETS_DN	0.375465	0.474959	0.35685	1.05553	19
c2.cgp	TSAI_RESPONSE_TO_IONIZING_RADIATION	0.0112974	0.031175	-0.326438	-1.42691	147
c2.cgp	YANG_BREAST_CANCER_ESR1_UP	0.0275916	0.0653802	-0.444698	-1.52027	36
c2.cgp	YANG_BREAST_CANCER_ESR1_DN	0.779079	0.810818	0.253917	0.802879	25
c2.cgp	YANG_BREAST_CANCER_ESR1_LASER_UP	0.56508	0.645636	-0.2793	-0.935924	33
c2.cgp	YANG_BREAST_CANCER_ESR1_LASER_DN	0.282236	0.387779	0.295817	1.10254	50
c2.cgp	YANG_BREAST_CANCER_ESR1_BULK_UP	0.25418	0.360594	-0.361974	-1.15144	26
c2.cgp	YANG_BREAST_CANCER_ESR1_BULK_DN	0.0671195	0.13119	0.45892	1.42054	23
c2.cgp	WANG_RESPONSE_TO_BEXAROTENE_UP	0.00060741	0.00272087	0.578609	1.96189	33
c2.cgp	WANG_RESPONSE_TO_BEXAROTENE_DN	0.227065	0.330913	-0.358893	-1.1697	29
c2.cgp	STANHILL_HRAS_TRANSFROMATION_UP	0.0104188	0.0291692	-0.744743	-1.7227	8
c2.cgp	REN_MIF_TARGETS_DN	0.406458	0.503453	0.544982	1.06826	5
c2.cgp	SEMBA_FHIT_TARGETS_UP	0.518198	0.607568	0.392733	0.961525	10
c2.cgp	SEMBA_FHIT_TARGETS_DN	0.000192567	0.00131152	0.87394	2.13966	10
c2.cgp	SHANK_TAL1_TARGETS_DN	0.156166	0.248376	-0.533218	-1.31186	10
c2.cgp	HASINA_NOL7_TARGETS_UP	0.212779	0.31555	-0.460238	-1.22242	13
c2.cgp	HASINA_NOL7_TARGETS_DN	0.00901085	0.0258369	-0.655954	-1.74225	13
c2.cgp	KONDO_HYPOXIA	0.557199	0.64008	-0.398555	-0.921915	8
c2.cgp	HOWLIN_PUBERTAL_MAMMARY_GLAND	0.00209964	0.00778437	-0.439559	-1.70873	68
c2.cgp	KREPPEL_CD99_TARGETS_UP	0.639856	0.703635	-0.429622	-0.858547	5
c2.cgp	KREPPEL_CD99_TARGETS_DN	0.00291727	0.0101592	-0.8108	-1.8755	8
c2.cgp	HATADA_METHYLATED_IN_LUNG_CANCER_UP	0.000168039	0.00131152	-0.35872	-1.74887	384
c2.cgp	HATADA_METHYLATED_IN_LUNG_CANCER_DN	0.185065	0.281465	0.347541	1.2014	36
c2.cgp	CALVET_IRINOTECAN_SENSITIVE_VS_RESISTANT_UP	0.877771	0.893343	-0.319383	-0.638247	5
c2.cgp	CALVET_IRINOTECAN_SENSITIVE_VS_RESISTANT_DN	0.582336	0.658595	0.471644	0.924507	5
c2.cgp	CALVET_IRINOTECAN_SENSITIVE_VS_REVERTED_UP	0.266413	0.372481	-0.602682	-1.20439	5
c2.cgp	CALVET_IRINOTECAN_SENSITIVE_VS_REVERTED_DN	0.379565	0.477744	-0.544427	-1.08797	5
c2.cgp	FURUKAWA_DUSP6_TARGETS_PCI35_UP	0.424655	0.52145	-0.256668	-1.01187	73
c2.cgp	FURUKAWA_DUSP6_TARGETS_PCI35_DN	0.000211372	0.00131152	0.653334	2.61482	72
c2.cgp	WANG_RESPONSE_TO_PACLITAXEL_VIA_MAPK8_UP	0.407666	0.5043	-0.384062	-1.03956	14
c2.cgp	WANG_RESPONSE_TO_PACLITAXEL_VIA_MAPK8_DN	0.00569981	0.0177003	-0.8579	-1.71441	5
c2.cgp	KARAKAS_TGFB1_SIGNALING	0.0641628	0.127106	0.498349	1.45048	18
c2.cgp	SHETH_LIVER_CANCER_VS_TXNIP_LOSS_PAM1	0.0076762	0.0226955	0.286215	1.36313	227
c2.cgp	SHETH_LIVER_CANCER_VS_TXNIP_LOSS_PAM2	0.00777951	0.0228974	0.315804	1.42821	153
c2.cgp	SHETH_LIVER_CANCER_VS_TXNIP_LOSS_PAM3	0.226118	0.329945	0.287078	1.13783	68
c2.cgp	SHETH_LIVER_CANCER_VS_TXNIP_LOSS_PAM4	0.00017301	0.00131152	-0.348719	-1.63017	254
c2.cgp	SHETH_LIVER_CANCER_VS_TXNIP_LOSS_PAM5	0.69712	0.751841	0.215249	0.898885	92
c2.cgp	SHETH_LIVER_CANCER_VS_TXNIP_LOSS_PAM6	0.498968	0.590313	0.266704	0.972401	45
c2.cgp	LIEN_BREAST_CARCINOMA_METAPLASTIC	0.566049	0.646292	-0.274972	-0.934491	35
c2.cgp	SCHMAHL_PDGF_SIGNALING	0.09699	0.174358	-0.592748	-1.41345	9
c2.cgp	TOMLINS_PROSTATE_CANCER_UP	0.00565086	0.0175888	0.470551	1.67405	40
c2.cgp	TOMLINS_PROSTATE_CANCER_DN	0.000198138	0.00131152	-0.709417	-2.48006	40
c2.cgp	TOMLINS_METASTASIS_UP	0.672537	0.729177	-0.318451	-0.845823	13
c2.cgp	TOMLINS_METASTASIS_DN	0.847647	0.868905	0.246281	0.736473	20
c2.cgp	LIANG_HEMATOPOIESIS_STEM_CELL_NUMBER_LARGE_VS_TINY_UP	0.0725494	0.139715	0.376078	1.35885	43
c2.cgp	LIANG_HEMATOPOIESIS_STEM_CELL_NUMBER_LARGE_VS_TINY_DN	0.619331	0.686745	0.251436	0.912056	44
c2.cgp	LIANG_HEMATOPOIESIS_STEM_CELL_NUMBER_SMALL_VS_HUGE_UP	0.813535	0.83867	0.227021	0.796315	38
c2.cgp	LIANG_HEMATOPOIESIS_STEM_CELL_NUMBER_SMALL_VS_HUGE_DN	0.0156034	0.0407945	-0.478642	-1.60391	33
c2.cgp	SPIELMAN_LYMPHOBLAST_EUROPEAN_VS_ASIAN_2FC_UP	0.730273	0.774819	-0.296684	-0.803054	14
c2.cgp	SPIELMAN_LYMPHOBLAST_EUROPEAN_VS_ASIAN_2FC_DN	0.351693	0.45438	-0.361264	-1.07397	20
c2.cgp	SPIELMAN_LYMPHOBLAST_EUROPEAN_VS_ASIAN_UP	0.000257998	0.00133416	0.382802	1.97397	473
c2.cgp	HUI_MAPK14_TARGETS_UP	0.0550496	0.112719	-0.489407	-1.47606	21
c2.cgp	DIERICK_SEROTONIN_FUNCTION_GENES	0.0280295	0.0662737	-0.753432	-1.59392	6
c2.cgp	THEODOROU_MAMMARY_TUMORIGENESIS	0.00357143	0.012015	-0.53761	-1.76368	30
c2.cgp	BALLIF_DEVELOPMENTAL_DISABILITY_P16_P12_DELETION	0.931381	0.939425	-0.236658	-0.615483	12
c2.cgp	SCHLESINGER_METHYLATED_IN_COLON_CANCER	0.0228738	0.0559023	-0.665771	-1.63797	10
c2.cgp	JIANG_CORE_DUPLICON_GENES	0.0872955	0.16073	0.676533	1.40499	6
c2.cgp	PUJANA_BREAST_CANCER_LIT_INT_NETWORK	0.000216403	0.00131152	0.554618	2.35223	100
c2.cgp	PUJANA_XPRSS_INT_NETWORK	0.000224669	0.00131152	0.66058	3.01495	166
c2.cgp	PUJANA_BRCA2_PCC_NETWORK	0.000252016	0.00131855	0.592428	3.02334	419
c2.cgp	PUJANA_BRCA_CENTERED_NETWORK	0.000216357	0.00131152	0.669659	2.91004	117
c2.cgp	SCHLESINGER_H3K27ME3_IN_NORMAL_AND_METHYLATED_IN_CANCER	0.0874728	0.160788	-0.427056	-1.37038	27
c2.cgp	SCHLESINGER_METHYLATED_DE_NOVO_IN_CANCER	0.000565718	0.00259992	-0.447511	-1.81658	87
c2.cgp	GOERING_BLOOD_HDL_CHOLESTEROL_QTL_CIS	0.979107	0.980606	-0.201335	-0.523617	12
c2.cgp	GOERING_BLOOD_HDL_CHOLESTEROL_QTL_TRANS	0.647392	0.708729	0.325794	0.860166	13
c2.cgp	KHETCHOUMIAN_TRIM24_TARGETS_UP	0.011096	0.030697	-0.441335	-1.59615	47
c2.cgp	KHETCHOUMIAN_TRIM24_TARGETS_DN	0.438216	0.532702	-0.440632	-1.01925	8
c2.cgp	OHM_METHYLATED_IN_ADULT_CANCERS	0.496735	0.588309	-0.302652	-0.971181	27
c2.cgp	OHM_EMBRYONIC_CARCINOMA_UP	0.709395	0.760814	0.3923	0.814711	6
c2.cgp	OHM_EMBRYONIC_CARCINOMA_DN	0.499479	0.590704	-0.416891	-0.964329	8
c2.cgp	ALCALA_APOPTOSIS	0.0302192	0.0701326	0.334319	1.38633	87
c2.cgp	OKAWA_NEUROBLASTOMA_1P36_31_DELETION	0.604031	0.674123	0.297875	0.901429	21
c2.cgp	COWLING_MYCN_TARGETS	0.0429833	0.0927147	-0.401812	-1.42549	43
c2.cgp	GROSS_HYPOXIA_VIA_HIF1A_ONLY	0.205876	0.307124	-0.542869	-1.25573	8
c2.cgp	FALVELLA_SMOKERS_WITH_LUNG_CANCER	0.000566358	0.00259992	-0.480389	-1.91341	77
c2.cgp	OZEN_MIR125B1_TARGETS	0.0216074	0.0532853	0.505693	1.59899	25
c2.cgp	GALIE_TUMOR_ANGIOGENESIS	0.0393832	0.0866643	-0.677631	-1.56746	8
c2.cgp	GALIE_TUMOR_STEMNESS_GENES	0.367334	0.467932	-0.515381	-1.09031	6
c2.cgp	KAUFFMANN_MELANOMA_RELAPSE_UP	0.000207082	0.00131152	0.797141	3.0951	61
c2.cgp	KAUFFMANN_MELANOMA_RELAPSE_DN	0.100948	0.180482	-0.668611	-1.41448	6
c2.cgp	WILLIAMS_ESR1_TARGETS_UP	0.00602652	0.0185388	0.545118	1.74242	26
c2.cgp	WILLIAMS_ESR1_TARGETS_DN	0.583772	0.659391	-0.427271	-0.903913	6
c2.cgp	WILLIAMS_ESR2_TARGETS_UP	0.0749646	0.143316	0.43011	1.38595	27
c2.cgp	WILLIAMS_ESR2_TARGETS_DN	0.714616	0.764212	0.327634	0.802144	10
c2.cgp	GROSS_ELK3_TARGETS_UP	0.000197902	0.00131152	-0.719346	-2.30831	27
c2.cgp	GROSS_ELK3_TARGETS_DN	0.0392779	0.0865491	-0.450008	-1.4873	31
c2.cgp	GROSS_HYPOXIA_VIA_ELK3_UP	0.0554664	0.11336	0.262882	1.23773	207
c2.cgp	GROSS_HYPOXIA_VIA_ELK3_DN	0.000181258	0.00131152	-0.41157	-1.8121	155
c2.cgp	GROSS_HIF1A_TARGETS_UP	0.0531361	0.109763	-0.65928	-1.52501	8
c2.cgp	GROSS_HIF1A_TARGETS_DN	0.119457	0.204194	0.423389	1.31056	23
c2.cgp	GROSS_HYPOXIA_VIA_HIF1A_UP	0.000211775	0.00131152	0.489688	1.97427	75
c2.cgp	GROSS_HYPOXIA_VIA_HIF1A_DN	0.00112024	0.00460778	-0.400953	-1.68583	110
c2.cgp	GROSS_HYPOXIA_VIA_ELK3_ONLY_UP	0.0086905	0.0251042	-0.501489	-1.68047	33
c2.cgp	GROSS_HYPOXIA_VIA_ELK3_ONLY_DN	0.206473	0.307593	-0.329853	-1.17631	44
c2.cgp	GROSS_HYPOXIA_VIA_ELK3_AND_HIF1A_UP	0.000183217	0.00131152	-0.403659	-1.75003	138
c2.cgp	GROSS_HYPOXIA_VIA_ELK3_AND_HIF1A_DN	0.0141551	0.0379091	0.341787	1.45414	103
c2.cgp	INGRAM_SHH_TARGETS_UP	0.00018457	0.00131152	-0.54121	-2.32399	127
c2.cgp	INGRAM_SHH_TARGETS_DN	0.0065184	0.0197913	-0.424803	-1.6283	63
c2.cgp	MANTOVANI_NFKB_TARGETS_UP	0.812291	0.837915	-0.226688	-0.80057	42
c2.cgp	MANTOVANI_NFKB_TARGETS_DN	0.537577	0.624024	-0.370826	-0.93873	11
c2.cgp	MANTOVANI_VIRAL_GPCR_SIGNALING_UP	0.177024	0.273052	-0.289899	-1.17036	84
c2.cgp	MANTOVANI_VIRAL_GPCR_SIGNALING_DN	0.166906	0.260393	0.327977	1.20854	47
c2.cgp	FERREIRA_EWINGS_SARCOMA_UNSTABLE_VS_STABLE_UP	0.000224669	0.00131152	0.634209	2.89459	166
c2.cgp	FERREIRA_EWINGS_SARCOMA_UNSTABLE_VS_STABLE_DN	0.00111566	0.00459471	-0.413179	-1.70846	97
c2.cgp	NAKAYAMA_FRA2_TARGETS	0.553876	0.636956	-0.266344	-0.944897	43
c2.cgp	LOPEZ_MBD_TARGETS_IMPRINTED_AND_X_LINKED	0.680106	0.736433	-0.299281	-0.850528	17
c2.cgp	ROPERO_HDAC2_TARGETS	0.0519044	0.1079	-0.312446	-1.31339	109
c2.cgp	GOUYER_TUMOR_INVASIVENESS	0.105021	0.185331	0.589637	1.39534	9
c2.cgp	LIU_LIVER_CANCER	0.123345	0.208983	-0.372379	-1.28112	37
c2.cgp	LIU_BREAST_CANCER	0.110232	0.192141	-0.412529	-1.32377	27
c2.cgp	LIU_NASOPHARYNGEAL_CARCINOMA	0.199314	0.298697	-0.30178	-1.16734	66
c2.cgp	LIU_COMMON_CANCER_GENES	0.130702	0.218394	0.30333	1.21644	73
c2.cgp	LOCKWOOD_AMPLIFIED_IN_LUNG_CANCER	0.000229991	0.00131152	0.494429	2.33709	213
c2.cgp	FREDERICK_PRKCI_TARGETS	0.217509	0.320708	-0.49749	-1.22396	10
c2.cgp	RAHMAN_TP53_TARGETS_PHOSPHORYLATED	0.0132385	0.0358063	0.557582	1.68736	21
c2.cgp	WEI_MIR34A_TARGETS	0.431333	0.526881	-0.230383	-1.00642	146
c2.cgp	LIAO_HAVE_SOX4_BINDING_SITES	0.00686176	0.0206611	0.461671	1.64246	40
c2.cgp	HASEGAWA_TUMORIGENESIS_BY_RET_C634R	0.0816446	0.152646	0.568948	1.43049	11
c2.cgp	TONG_INTERACT_WITH_PTTG1	0.00392238	0.0129166	0.433093	1.63994	54
c2.cgp	SCIAN_CELL_CYCLE_TARGETS_OF_TP53_AND_TP73_UP	0.270067	0.376115	-0.493732	-1.17734	9
c2.cgp	SCIAN_CELL_CYCLE_TARGETS_OF_TP53_AND_TP73_DN	0.000198413	0.00131152	0.807962	2.47616	22
c2.cgp	SCIAN_INVERSED_TARGETS_OF_TP53_AND_TP73_UP	0.330865	0.434859	0.444768	1.11827	11
c2.cgp	SCIAN_INVERSED_TARGETS_OF_TP53_AND_TP73_DN	0.0744048	0.142533	-0.421128	-1.38155	30
c2.cgp	GUENTHER_GROWTH_SPHERICAL_VS_ADHERENT_UP	0.624185	0.691424	0.293983	0.889653	21
c2.cgp	GUENTHER_GROWTH_SPHERICAL_VS_ADHERENT_DN	0.00238996	0.00860702	-0.584078	-1.82277	24
c2.cgp	SCHWAB_TARGETS_OF_BMYB_POLYMORPHIC_VARIANTS_UP	0.363938	0.465056	0.408234	1.07783	13
c2.cgp	SCHWAB_TARGETS_OF_BMYB_POLYMORPHIC_VARIANTS_DN	0.022104	0.0543459	-0.572343	-1.62654	17
c2.cgp	GOUYER_TATI_TARGETS_UP	0.115201	0.198894	-0.557661	-1.37199	10
c2.cgp	GOUYER_TATI_TARGETS_DN	0.265452	0.371747	-0.406378	-1.15489	17
c2.cgp	CAFFAREL_RESPONSE_TO_THC_UP	0.79367	0.823121	0.237734	0.799627	32
c2.cgp	CAFFAREL_RESPONSE_TO_THC_DN	0.00423302	0.0137321	0.524996	1.75077	31
c2.cgp	CAFFAREL_RESPONSE_TO_THC_8HR_5_UP	0.333009	0.436974	0.391278	1.10195	16
c2.cgp	CAFFAREL_RESPONSE_TO_THC_8HR_5_DN	0.435729	0.530664	-0.403966	-1.02262	11
c2.cgp	CAFFAREL_RESPONSE_TO_THC_8HR_3_UP	0.177208	0.273206	0.649279	1.2727	5
c2.cgp	CAFFAREL_RESPONSE_TO_THC_8HR_3_DN	0.0011554	0.0047227	0.782567	1.91595	10
c2.cgp	CAFFAREL_RESPONSE_TO_THC_24HR_3_UP	0.322682	0.426424	-0.508713	-1.12924	7
c2.cgp	CAFFAREL_RESPONSE_TO_THC_24HR_3_DN	0.131276	0.218845	0.509243	1.34451	13
c2.cgp	CAFFAREL_RESPONSE_TO_THC_24HR_5_UP	0.0493001	0.103341	0.428666	1.44183	32
c2.cgp	CAFFAREL_RESPONSE_TO_THC_24HR_5_DN	0.000206016	0.00131152	0.517889	1.98953	58
c2.cgp	RANKIN_ANGIOGENIC_TARGETS_OF_VHL_HIF2A_UP	0.994302	0.994911	0.223212	0.437536	5
c2.cgp	RANKIN_ANGIOGENIC_TARGETS_OF_VHL_HIF2A_DN	0.146489	0.236552	-0.57692	-1.3345	8
c2.cgp	BERTUCCI_INVASIVE_CARCINOMA_DUCTAL_VS_LOBULAR_UP	0.12106	0.206073	0.416517	1.30369	24
c2.cgp	BERTUCCI_INVASIVE_CARCINOMA_DUCTAL_VS_LOBULAR_DN	0.000193874	0.00131152	-0.766957	-2.75203	45
c2.cgp	SUH_COEXPRESSED_WITH_ID1_AND_ID2_UP	0.09591	0.172892	-0.479603	-1.38344	18
c2.cgp	WOTTON_RUNX_TARGETS_UP	0.0945153	0.170566	-0.45687	-1.37793	21
c2.cgp	WOTTON_RUNX_TARGETS_DN	0.22408	0.327681	-0.359434	-1.17146	29
c2.cgp	FUJIWARA_PARK2_HEPATOCYTE_PROLIFERATION_UP	0.181013	0.276853	0.523333	1.28127	10
c2.cgp	FUJIWARA_PARK2_HEPATOCYTE_PROLIFERATION_DN	0.00291727	0.0101592	-0.809584	-1.87269	8
c2.cgp	FUJIWARA_PARK2_IN_LIVER_CANCER_UP	0.301941	0.40749	0.505859	1.1539	8
c2.cgp	FUJIWARA_PARK2_IN_LIVER_CANCER_DN	0.860969	0.879317	0.350392	0.686831	5
c2.cgp	GARCIA_TARGETS_OF_FLI1_AND_DAX1_UP	0.2284	0.332089	0.298488	1.1422	57
c2.cgp	GARCIA_TARGETS_OF_FLI1_AND_DAX1_DN	0.000224669	0.00131152	0.483564	2.21867	171
c2.cgp	RICKMAN_TUMOR_DIFFERENTIATED_WELL_VS_POORLY_UP	0.00235349	0.00852262	0.300129	1.43439	234
c2.cgp	RICKMAN_TUMOR_DIFFERENTIATED_WELL_VS_POORLY_DN	0.00688497	0.0206929	-0.273606	-1.33254	379
c2.cgp	RICKMAN_TUMOR_DIFFERENTIATED_WELL_VS_MODERATELY_UP	0.0526218	0.109038	-0.312524	-1.3135	108
c2.cgp	RICKMAN_TUMOR_DIFFERENTIATED_WELL_VS_MODERATELY_DN	0.28118	0.386815	-0.259202	-1.08958	109
c2.cgp	RICKMAN_TUMOR_DIFFERENTIATED_MODERATELY_VS_POORLY_UP	0.00195737	0.00737397	0.350591	1.53137	121
c2.cgp	RICKMAN_TUMOR_DIFFERENTIATED_MODERATELY_VS_POORLY_DN	0.0865835	0.159689	0.512761	1.41767	15
c2.cgp	RICKMAN_METASTASIS_UP	0.0143175	0.0382188	0.256103	1.27947	341
c2.cgp	RICKMAN_METASTASIS_DN	0.0839246	0.155663	-0.255901	-1.19851	260
c2.cgp	FRIDMAN_SENESCENCE_UP	0.0424769	0.091804	-0.345023	-1.37424	77
c2.cgp	FRIDMAN_SENESCENCE_DN	0.356821	0.458262	-0.415805	-1.0814	12
c2.cgp	FRIDMAN_IMMORTALIZATION_DN	0.103101	0.183055	-0.392763	-1.31613	33
c2.cgp	SCHAEFFER_PROSTATE_DEVELOPMENT_6HR_UP	0.000178476	0.00131152	-0.439801	-1.96827	175
c2.cgp	SCHAEFFER_PROSTATE_DEVELOPMENT_12HR_UP	0.000185943	0.00131152	-0.456356	-1.93309	116
c2.cgp	SCHAEFFER_PROSTATE_DEVELOPMENT_12HR_DN	0.390528	0.489282	-0.276387	-1.03621	56
c2.cgp	SCHAEFFER_PROSTATE_DEVELOPMENT_48HR_UP	0.000486934	0.0022682	-0.286376	-1.42733	480
c2.cgp	SCHAEFFER_PROSTATE_DEVELOPMENT_48HR_DN	0.000165262	0.00131152	-0.449197	-2.21348	427
c2.cgp	SCHAEFFER_PROSTATE_DEVELOPMENT_AND_CANCER_BOX1_UP	0.387977	0.486832	-0.383973	-1.05516	15
c2.cgp	SCHAEFFER_PROSTATE_DEVELOPMENT_AND_CANCER_BOX1_DN	0.545852	0.630496	-0.378718	-0.931747	10
c2.cgp	SCHAEFFER_PROSTATE_DEVELOPMENT_AND_CANCER_BOX2_UP	0.0446786	0.0954896	-0.72984	-1.54401	6
c2.cgp	SCHAEFFER_PROSTATE_DEVELOPMENT_AND_CANCER_BOX2_DN	0.285769	0.391922	0.534306	1.16697	7
c2.cgp	SCHAEFFER_PROSTATE_DEVELOPMENT_AND_CANCER_BOX4_UP	0.0800821	0.15065	-0.570913	-1.44524	11
c2.cgp	SCHAEFFER_PROSTATE_DEVELOPMENT_AND_CANCER_BOX4_DN	0.221565	0.324821	-0.352433	-1.17493	32
c2.cgp	SCHAEFFER_PROSTATE_DEVELOPMENT_AND_CANCER_BOX5_UP	0.00308008	0.0106581	-0.727085	-1.84059	11
c2.cgp	SCHAEFFER_PROSTATE_DEVELOPMENT_AND_CANCER_BOX5_DN	0.897895	0.909578	-0.276408	-0.639373	8
c2.cgp	SCHAEFFER_PROSTATE_DEVELOPMENT_AND_CANCER_BOX6_UP	0.000208377	0.00131152	-0.867332	-2.00627	8
c2.cgp	SCHAEFFER_PROSTATE_DEVELOPMENT_AND_CANCER_BOX6_DN	0.16825	0.26174	-0.662899	-1.32472	5
c2.cgp	SCHAEFFER_SOX9_TARGETS_IN_PROSTATE_DEVELOPMENT_UP	0.0510018	0.106227	-0.493523	-1.48847	21
c2.cgp	SCHAEFFER_SOX9_TARGETS_IN_PROSTATE_DEVELOPMENT_DN	0.0564172	0.114729	-0.387055	-1.38885	45
c2.cgp	KOYAMA_SEMA3B_TARGETS_UP	0.0104883	0.0293135	-0.287216	-1.35773	280
c2.cgp	KOYAMA_SEMA3B_TARGETS_DN	0.180781	0.276629	-0.225973	-1.10574	396
c2.cgp	COURTOIS_SENESCENCE_TRIGGERS	0.442564	0.536391	0.497608	1.03341	6
c2.cgp	RICKMAN_HEAD_AND_NECK_CANCER_A	0.0243585	0.0590017	-0.341145	-1.4106	97
c2.cgp	SCHAEFFER_PROSTATE_DEVELOPMENT_AND_CANCER_BOX3	0.290978	0.396788	0.59515	1.1666	5
c2.cgp	RICKMAN_HEAD_AND_NECK_CANCER_B	0.22805	0.331728	-0.320177	-1.15452	46
c2.cgp	RICKMAN_HEAD_AND_NECK_CANCER_C	0.272218	0.378306	-0.260618	-1.09553	109
c2.cgp	RICKMAN_HEAD_AND_NECK_CANCER_D	0.891562	0.904563	-0.215766	-0.733281	35
c2.cgp	RICKMAN_HEAD_AND_NECK_CANCER_E	0.535842	0.622902	-0.235274	-0.958511	89
c2.cgp	RICKMAN_HEAD_AND_NECK_CANCER_F	0.000193874	0.00131152	-0.545856	-2.03237	54
c2.cgp	WU_CELL_MIGRATION	0.00231317	0.00841386	-0.3367	-1.51491	182
c2.cgp	TAGHAVI_NEOPLASTIC_TRANSFORMATION	0.58685	0.661724	-0.347276	-0.903171	12
c2.cgp	COLIN_PILOCYTIC_ASTROCYTOMA_VS_GLIOBLASTOMA_UP	0.103115	0.183055	-0.386127	-1.31225	35
c2.cgp	COLIN_PILOCYTIC_ASTROCYTOMA_VS_GLIOBLASTOMA_DN	0.260241	0.366174	-0.355964	-1.14225	27
c2.cgp	BALDWIN_PRKCI_TARGETS_UP	0.0191246	0.0480688	-0.460997	-1.56669	35
c2.cgp	GOTZMANN_EPITHELIAL_TO_MESENCHYMAL_TRANSITION_UP	0.35044	0.453932	-0.272136	-1.05445	67
c2.cgp	GOTZMANN_EPITHELIAL_TO_MESENCHYMAL_TRANSITION_DN	0.18045	0.276483	-0.247836	-1.12965	204
c2.cgp	HE_PTEN_TARGETS_UP	0.371563	0.471118	-0.388684	-1.06811	15
c2.cgp	HE_PTEN_TARGETS_DN	0.40873	0.504844	-0.470896	-1.04529	7
c2.cgp	AMIT_DELAYED_EARLY_GENES	0.000204499	0.00131152	-0.78945	-2.27721	18
c2.cgp	DEN_INTERACT_WITH_LCA5	0.0118521	0.0325139	0.518494	1.65732	26
c2.cgp	PASQUALUCCI_LYMPHOMA_BY_GC_STAGE_UP	0.00023872	0.00131152	0.338618	1.65343	279
c2.cgp	PASQUALUCCI_LYMPHOMA_BY_GC_STAGE_DN	0.000180571	0.00131152	-0.404259	-1.79374	164
c2.cgp	BENPORATH_ES_1	0.00024728	0.00131152	0.549543	2.77158	373
c2.cgp	BENPORATH_ES_2	0.000202306	0.00131152	0.615654	2.1426	37
c2.cgp	BENPORATH_OCT4_TARGETS	0.0729238	0.140271	-0.255261	-1.20851	283
c2.cgp	BENPORATH_NOS_TARGETS	0.0360862	0.080934	-0.29339	-1.30972	173
c2.cgp	BENPORATH_MYC_TARGETS_WITH_EBOX	0.00115048	0.00471439	0.326157	1.54433	216
c2.cgp	BENPORATH_PROLIFERATION	0.000221533	0.00131152	0.713916	3.21404	147
c2.cgp	PETRETTO_CARDIAC_HYPERTROPHY	0.016986	0.0436483	-0.469617	-1.58506	34
c2.cgp	STARK_PREFRONTAL_CORTEX_22Q11_DELETION_UP	0.000532576	0.00247332	-0.367389	-1.66412	193
c2.cgp	STARK_HYPPOCAMPUS_22Q11_DELETION_UP	0.214174	0.317044	-0.311989	-1.15789	53
c2.cgp	STARK_HYPPOCAMPUS_22Q11_DELETION_DN	0.384867	0.483301	-0.365882	-1.0554	18
c2.cgp	STARK_BRAIN_22Q11_DELETION	0.878968	0.894282	-0.255054	-0.677439	13
c2.cgp	BENPORATH_ES_CORE_NINE	0.0180146	0.0458069	0.692819	1.63951	9
c2.cgp	BENPORATH_ES_CORE_NINE_CORRELATED	0.000216403	0.00131152	0.458055	1.94269	100
c2.cgp	PETRETTO_BLOOD_PRESSURE_UP	0.292578	0.398348	0.446938	1.15123	12
c2.cgp	PETRETTO_BLOOD_PRESSURE_DN	0.442147	0.536085	-0.457397	-1.01532	7
c2.cgp	PETRETTO_HEART_MASS_QTL_CIS_UP	0.871574	0.888419	0.22739	0.741437	28
c2.cgp	PETRETTO_HEART_MASS_QTL_CIS_DN	0.336669	0.441246	-0.351961	-1.0851	23
c2.cgp	PETRETTO_LEFT_VENTRICLE_MASS_QTL_CIS_UP	0.149631	0.240558	-0.631917	-1.33685	6
c2.cgp	PETRETTO_LEFT_VENTRICLE_MASS_QTL_CIS_DN	0.778404	0.810373	-0.336761	-0.747539	7
c2.cgp	AMIT_EGF_RESPONSE_20_HELA	0.00246407	0.00880601	-0.739042	-1.87086	11
c2.cgp	AMIT_EGF_RESPONSE_40_HELA	0.000196967	0.00131152	-0.67528	-2.38481	42
c2.cgp	AMIT_EGF_RESPONSE_60_HELA	0.00155976	0.00607192	-0.49233	-1.75572	44
c2.cgp	AMIT_EGF_RESPONSE_120_HELA	0.000572628	0.00261522	-0.467969	-1.81917	68
c2.cgp	AMIT_EGF_RESPONSE_240_HELA	0.0700563	0.135633	-0.350016	-1.32717	60
c2.cgp	AMIT_EGF_RESPONSE_480_HELA	0.0325675	0.0745768	0.285434	1.30089	163
c2.cgp	AMIT_EGF_RESPONSE_20_MCF10A	0.0175678	0.0448453	0.604886	1.63615	14
c2.cgp	AMIT_EGF_RESPONSE_40_MCF10A	0.00388469	0.0128323	-0.613307	-1.79629	19
c2.cgp	AMIT_EGF_RESPONSE_60_MCF10A	0.000198413	0.00131152	-0.663629	-2.30299	39
c2.cgp	AMIT_EGF_RESPONSE_120_MCF10A	0.796663	0.825964	-0.228231	-0.809685	43
c2.cgp	AMIT_EGF_RESPONSE_240_MCF10A	0.241942	0.34654	-0.392997	-1.1683	20
c2.cgp	AMIT_EGF_RESPONSE_480_MCF10A	0.0546159	0.111971	0.387275	1.3993	43
c2.cgp	AMIT_SERUM_RESPONSE_20_MCF10A	0.726931	0.772276	0.273201	0.826761	21
c2.cgp	AMIT_SERUM_RESPONSE_40_MCF10A	0.000197122	0.00131152	-0.739208	-2.46434	32
c2.cgp	AMIT_SERUM_RESPONSE_60_MCF10A	0.000193648	0.00131152	-0.54678	-2.05582	57
c2.cgp	AMIT_SERUM_RESPONSE_120_MCF10A	0.000190186	0.00131152	-0.561816	-2.16448	64
c2.cgp	AMIT_SERUM_RESPONSE_240_MCF10A	0.101514	0.181192	-0.342745	-1.285	56
c2.cgp	AMIT_SERUM_RESPONSE_480_MCF10A	0.00202306	0.0075778	0.514646	1.79108	37
c2.cgp	GEORGES_CELL_CYCLE_MIR192_TARGETS	0.000415196	0.00198493	0.47428	1.84744	62
c2.cgp	SHEN_SMARCA2_TARGETS_UP	0.000165262	0.00131152	-0.372879	-1.83591	423
c2.cgp	SHEN_SMARCA2_TARGETS_DN	0.0145428	0.0387254	0.255128	1.27574	343
c2.cgp	LIN_SILENCED_BY_TUMOR_MICROENVIRONMENT	0.0472572	0.0997619	-0.318514	-1.33193	105
c2.cgp	SAKAI_TUMOR_INFILTRATING_MONOCYTES_DN	0.00234442	0.00850859	0.399456	1.62547	79
c2.cgp	SAKAI_TUMOR_INFILTRATING_MONOCYTES_UP	0.110034	0.191936	-0.412778	-1.32457	27
c2.cgp	SAKAI_CHRONIC_HEPATITIS_VS_LIVER_CANCER_DN	0.0741033	0.142039	-0.401251	-1.37174	36
c2.cgp	JEON_SMAD6_TARGETS_UP	0.0796654	0.150234	-0.448029	-1.39819	24
c2.cgp	JEON_SMAD6_TARGETS_DN	0.000195656	0.00131152	0.735735	2.17624	19
c2.cgp	WANG_PROSTATE_CANCER_ANDROGEN_INDEPENDENT	0.0635223	0.126272	-0.347083	-1.33719	64
c2.cgp	SUNG_METASTASIS_STROMA_UP	0.376774	0.475677	-0.246121	-1.03483	110
c2.cgp	SUNG_METASTASIS_STROMA_DN	0.000205719	0.00131152	0.521037	1.9576	52
c2.cgp	SHIN_B_CELL_LYMPHOMA_CLUSTER_1	0.271875	0.378037	0.453772	1.16883	12
c2.cgp	SHIN_B_CELL_LYMPHOMA_CLUSTER_2	0.651409	0.712411	-0.272516	-0.88029	28
c2.cgp	SHIN_B_CELL_LYMPHOMA_CLUSTER_3	0.0029982	0.0103857	-0.563337	-1.81971	28
c2.cgp	SHIN_B_CELL_LYMPHOMA_CLUSTER_5	0.70593	0.758591	-0.286672	-0.826922	18
c2.cgp	SHIN_B_CELL_LYMPHOMA_CLUSTER_6	0.0223819	0.0549235	-0.648554	-1.64179	11
c2.cgp	SHIN_B_CELL_LYMPHOMA_CLUSTER_7	0.072828	0.140169	-0.437291	-1.40322	27
c2.cgp	SHIN_B_CELL_LYMPHOMA_CLUSTER_8	0.108925	0.190492	0.38083	1.31007	35
c2.cgp	SHIN_B_CELL_LYMPHOMA_CLUSTER_9	0.446292	0.54051	0.33948	1.00415	19
c2.cgp	ZHANG_RESPONSE_TO_IKK_INHIBITOR_AND_TNF_UP	0.000175254	0.00131152	-0.392842	-1.80879	221
c2.cgp	ZHANG_RESPONSE_TO_IKK_INHIBITOR_AND_TNF_DN	0.138284	0.227575	0.279211	1.1879	103
c2.cgp	MORI_PRE_BI_LYMPHOCYTE_UP	0.000213356	0.00131152	0.66329	2.70689	80
c2.cgp	MORI_PRE_BI_LYMPHOCYTE_DN	0.000943931	0.00398792	-0.438906	-1.74818	77
c2.cgp	MORI_LARGE_PRE_BII_LYMPHOCYTE_UP	0.000213038	0.00131152	0.75597	3.12418	85
c2.cgp	MORI_LARGE_PRE_BII_LYMPHOCYTE_DN	0.00019425	0.00131152	-0.51876	-1.9568	58
c2.cgp	MORI_SMALL_PRE_BII_LYMPHOCYTE_UP	0.066365	0.13026	-0.323998	-1.31239	86
c2.cgp	MORI_SMALL_PRE_BII_LYMPHOCYTE_DN	0.0712323	0.137747	0.325201	1.30155	72
c2.cgp	MORI_IMMATURE_B_LYMPHOCYTE_UP	0.000194704	0.00131152	-0.545107	-2.02307	53
c2.cgp	MORI_IMMATURE_B_LYMPHOCYTE_DN	0.000213265	0.00131152	0.74498	3.09383	88
c2.cgp	MORI_MATURE_B_LYMPHOCYTE_UP	0.000188218	0.00131152	-0.529455	-2.15314	88
c2.cgp	MORI_MATURE_B_LYMPHOCYTE_DN	0.000211372	0.00131152	0.516637	2.07844	74
c2.cgp	MORI_PLASMA_CELL_UP	0.000205212	0.00131152	0.60919	2.26236	49
c2.cgp	MORI_PLASMA_CELL_DN	0.0361446	0.0810094	-0.444001	-1.48783	33
c2.cgp	MORI_EMU_MYC_LYMPHOMA_BY_ONSET_TIME_UP	0.000215239	0.00131152	0.525051	2.25546	109
c2.cgp	MORI_EMU_MYC_LYMPHOMA_BY_ONSET_TIME_DN	0.133852	0.22237	-0.46316	-1.31626	17
c2.cgp	COLLIS_PRKDC_SUBSTRATES	0.127543	0.214655	0.454345	1.3224	18
c2.cgp	COLLIS_PRKDC_REGULATORS	0.454226	0.548088	0.369976	1.00075	14
c2.cgp	TOMIDA_LUNG_CANCER_POOR_SURVIVAL	0.562013	0.643256	0.479792	0.940479	5
c2.cgp	LEE_TARGETS_OF_PTCH1_AND_SUFU_UP	0.177981	0.274139	-0.323318	-1.1952	52
c2.cgp	LEE_TARGETS_OF_PTCH1_AND_SUFU_DN	0.165786	0.25961	-0.293286	-1.1791	82
c2.cgp	KAUFFMANN_DNA_REPAIR_GENES	0.000232612	0.00131152	0.517017	2.46235	227
c2.cgp	KAUFFMANN_DNA_REPLICATION_GENES	0.00022041	0.00131152	0.499932	2.24814	145
c2.cgp	NIKOLSKY_BREAST_CANCER_1Q21_AMPLICON	0.000202922	0.00131152	0.754191	2.60712	36
c2.cgp	NIKOLSKY_BREAST_CANCER_1Q32_AMPLICON	0.960344	0.965167	0.217919	0.575353	13
c2.cgp	NIKOLSKY_BREAST_CANCER_5P15_AMPLICON	0.0142628	0.0381351	0.512396	1.63783	26
c2.cgp	NIKOLSKY_BREAST_CANCER_6P24_P22_AMPLICON	0.00326397	0.0111878	-0.60913	-1.81082	20
c2.cgp	NIKOLSKY_BREAST_CANCER_7P22_AMPLICON	0.0344968	0.0781194	0.427549	1.47797	36
c2.cgp	NIKOLSKY_BREAST_CANCER_7P15_AMPLICON	0.266119	0.372362	-0.461107	-1.16727	11
c2.cgp	NIKOLSKY_BREAST_CANCER_7Q21_Q22_AMPLICON	0.265612	0.371811	0.279023	1.10807	69
c2.cgp	NIKOLSKY_BREAST_CANCER_8P12_P11_AMPLICON	0.936022	0.943524	-0.192357	-0.716197	54
c2.cgp	NIKOLSKY_BREAST_CANCER_8Q12_Q22_AMPLICON	0.143136	0.232632	0.267554	1.17336	124
c2.cgp	NIKOLSKY_BREAST_CANCER_8Q23_Q24_AMPLICON	0.000221533	0.00131152	0.47933	2.15794	147
c2.cgp	NIKOLSKY_BREAST_CANCER_10Q22_AMPLICON	0.738228	0.779718	0.343576	0.783718	8
c2.cgp	NIKOLSKY_BREAST_CANCER_11Q12_Q14_AMPLICON	0.000221533	0.00131152	0.381048	1.71547	147
c2.cgp	NIKOLSKY_BREAST_CANCER_12Q13_Q21_AMPLICON	0.0722348	0.139356	0.372968	1.3529	44
c2.cgp	NIKOLSKY_BREAST_CANCER_12Q24_AMPLICON	0.0157956	0.0411334	0.602512	1.66581	15
c2.cgp	NIKOLSKY_BREAST_CANCER_14Q22_AMPLICON	0.437634	0.532192	0.374847	1.01392	14
c2.cgp	NIKOLSKY_BREAST_CANCER_15Q26_AMPLICON	0.00836393	0.0243328	-0.57908	-1.72149	20
c2.cgp	NIKOLSKY_BREAST_CANCER_16P13_AMPLICON	0.0002151	0.00131152	0.503585	2.17232	112
c2.cgp	NIKOLSKY_BREAST_CANCER_16Q24_AMPLICON	0.00268984	0.00949868	0.456261	1.70729	51
c2.cgp	NIKOLSKY_BREAST_CANCER_17P11_AMPLICON	0.0122687	0.0335159	-0.694389	-1.70838	10
c2.cgp	NIKOLSKY_BREAST_CANCER_17Q11_Q21_AMPLICON	0.000652458	0.00290673	0.376605	1.645	121
c2.cgp	NIKOLSKY_BREAST_CANCER_17Q21_Q25_AMPLICON	0.00024564	0.00131152	0.343155	1.70561	325
c2.cgp	NIKOLSKY_BREAST_CANCER_19P13_AMPLICON	0.734642	0.776879	-0.389083	-0.777534	5
c2.cgp	NIKOLSKY_BREAST_CANCER_19Q13.1_AMPLICON	0.975212	0.977903	-0.187757	-0.572882	22
c2.cgp	NIKOLSKY_BREAST_CANCER_19Q13.4_AMPLICON	0.300752	0.406556	-0.518623	-1.15123	7
c2.cgp	NIKOLSKY_BREAST_CANCER_20P13_AMPLICON	0.0264638	0.063173	-0.699977	-1.61915	8
c2.cgp	NIKOLSKY_BREAST_CANCER_20Q11_AMPLICON	0.00745817	0.022151	0.502874	1.677	31
c2.cgp	NIKOLSKY_BREAST_CANCER_20Q12_Q13_AMPLICON	0.000220459	0.00131152	0.409029	1.83685	144
c2.cgp	NIKOLSKY_BREAST_CANCER_21Q22_AMPLICON	0.435096	0.53009	-0.364189	-1.01538	16
c2.cgp	NIKOLSKY_BREAST_CANCER_22Q13_AMPLICON	0.114275	0.197818	0.492406	1.36139	15
c2.cgp	NIKOLSKY_MUTATED_AND_AMPLIFIED_IN_BREAST_CANCER	0.282002	0.387767	0.260795	1.08752	91
c2.cgp	WHITEHURST_PACLITAXEL_SENSITIVITY	0.864455	0.881987	0.218387	0.760031	37
c2.cgp	STEGMEIER_PRE-MITOTIC_CELL_CYCLE_REGULATORS	0.805924	0.833187	0.292823	0.736236	11
c2.cgp	TESAR_ALK_TARGETS_HUMAN_ES_4D_DN	0.744956	0.784039	-0.409301	-0.766009	4
c2.cgp	TESAR_ALK_TARGETS_HUMAN_ES_5D_UP	0.974879	0.977869	-0.248297	-0.496191	5
c2.cgp	TESAR_ALK_TARGETS_HUMAN_ES_5D_DN	0.744956	0.784039	-0.409301	-0.766009	4
c2.cgp	JI_METASTASIS_REPRESSED_BY_STK11	0.332476	0.436625	-0.337611	-1.08336	27
c2.cgp	GOTTWEIN_TARGETS_OF_KSHV_MIR_K12_11	0.0273867	0.0649416	-0.380299	-1.45269	62
c2.cgp	CHEN_NEUROBLASTOMA_COPY_NUMBER_GAINS	0.158681	0.251034	-0.331775	-1.21771	50
c2.cgp	TCGA_GLIOBLASTOMA_COPY_NUMBER_UP	0.44303	0.536757	0.25141	1.00823	73
c2.cgp	TCGA_GLIOBLASTOMA_COPY_NUMBER_DN	0.0240796	0.0584127	-0.478813	-1.56054	29
c2.cgp	DING_LUNG_CANCER_MUTATED_SIGNIFICANTLY	0.219745	0.323097	-0.372648	-1.18539	26
c2.cgp	DING_LUNG_CANCER_MUTATED_FREQUENTLY	0.363171	0.46462	-0.413861	-1.07634	12
c2.cgp	DING_LUNG_CANCER_EXPRESSION_BY_COPY_NUMBER	0.16728	0.260727	0.274895	1.16588	100
c2.cgp	ONDER_CDH1_TARGETS_2_UP	0.00017337	0.00131152	-0.503873	-2.35599	256
c2.cgp	ONDER_CDH1_TARGETS_2_DN	0.0460762	0.0978125	-0.243038	-1.20607	461
c2.cgp	ONDER_CDH1_TARGETS_1_UP	0.075852	0.144796	-0.289776	-1.2563	138
c2.cgp	ONDER_CDH1_TARGETS_1_DN	0.231866	0.33638	-0.248251	-1.1043	168
c2.cgp	ONDER_CDH1_TARGETS_3_UP	0.235571	0.339813	-0.417977	-1.18785	17
c2.cgp	ONDER_CDH1_TARGETS_3_DN	0.0889451	0.163124	-0.343261	-1.2976	59
c2.cgp	ONDER_CDH1_SIGNALING_VIA_CTNNB1	0.00337331	0.0114308	-0.405249	-1.63446	83
c2.cgp	ZEILSTRA_CD44_TARGETS_UP	0.325662	0.428891	0.516056	1.12711	7
c2.cgp	ZEILSTRA_CD44_TARGETS_DN	0.670844	0.728306	-0.375868	-0.834347	7
c2.cgp	CERVERA_SDHB_TARGETS_2	0.00952737	0.0270204	-0.349519	-1.47324	112
c2.cgp	ROZANOV_MMP14_TARGETS_SUBSET	0.183235	0.279078	0.356152	1.20761	33
c2.cgp	ROZANOV_MMP14_CORRELATED	0.379261	0.477544	-0.422001	-1.06828	11
c2.cgp	ROZANOV_MMP14_TARGETS_UP	0.000345901	0.00177563	-0.326185	-1.53184	265
c2.cgp	ROZANOV_MMP14_TARGETS_DN	0.115939	0.199642	-0.38372	-1.29514	34
c2.cgp	LANDEMAINE_LUNG_METASTASIS	0.0790358	0.149391	0.464387	1.40533	21
c2.cgp	CERVERA_SDHB_TARGETS_1_UP	0.0130112	0.0352206	-0.340492	-1.44327	117
c2.cgp	CERVERA_SDHB_TARGETS_1_DN	0.835511	0.857808	-0.226549	-0.782662	38
c2.cgp	LE_EGR2_TARGETS_DN	0.000185839	0.00131152	-0.597776	-2.50822	107
c2.cgp	ROSS_ACUTE_MYELOID_LEUKEMIA_CBF	0.000188608	0.00131152	-0.527398	-2.1203	82
c2.cgp	BYSTRYKH_SCP2_QTL	0.227187	0.330913	-0.586041	-1.2398	6
c2.cgp	KENNY_CTNNB1_TARGETS_UP	0.120074	0.204928	0.338687	1.26232	50
c2.cgp	CHEOK_RESPONSE_TO_MERCAPTOPURINE_DN	0.04474	0.0955584	-0.492506	-1.50273	22
c2.cgp	NELSON_RESPONSE_TO_ANDROGEN_DN	0.338377	0.442597	-0.372637	-1.0914	19
c2.cgp	TARTE_PLASMA_CELL_VS_B_LYMPHOCYTE_UP	0.00042508	0.00201159	0.457565	1.8543	77
c2.cgp	BYSTROEM_CORRELATED_WITH_IL5_DN	0.663919	0.722227	-0.233965	-0.896805	63
c2.cgp	SWEET_KRAS_TARGETS_DN	0.0929987	0.168573	0.324732	1.27211	65
c2.cgp	SHEPARD_CRUSH_AND_BURN_MUTANT_UP	0.00731596	0.021788	0.297899	1.39145	196
c2.cgp	ROSS_AML_WITH_PML_RARA_FUSION	0.0409666	0.0894264	-0.345625	-1.37664	77
c2.cgp	ZUCCHI_METASTASIS_DN	0.00409437	0.0133752	-0.471294	-1.68071	44
c2.cgp	LEI_HOXC8_TARGETS_UP	0.535641	0.622902	-0.362377	-0.942445	12
c2.cgp	PARK_HSC_VS_MULTIPOTENT_PROGENITORS_DN	0.346831	0.450233	0.370992	1.0798	18
c2.cgp	LEE_LIVER_CANCER_CIPROFIBRATE_DN	0.707985	0.7598	-0.227579	-0.877906	65
c2.cgp	ASTON_MAJOR_DEPRESSIVE_DISORDER_DN	0.00200036	0.007506	-0.355956	-1.57118	158
c2.cgp	STANELLE_E2F1_TARGETS	0.236488	0.34078	0.351909	1.1561	29
c2.cgp	CHESLER_BRAIN_D6MIT150_QTL_CIS	0.0572264	0.116014	-0.677618	-1.50417	7
c2.cgp	SHIPP_DLBCL_CURED_VS_FATAL_DN	0.422662	0.519783	0.280375	1.01305	43
c2.cgp	GRANDVAUX_IFN_RESPONSE_NOT_VIA_IRF3	0.377513	0.475894	0.393774	1.06512	14
c2.cgp	UEDA_CENTRAL_CLOCK	0.255516	0.361704	-0.272843	-1.10755	87
c2.cgp	BYSTRYKH_HEMATOPOIESIS_STEM_CELL_FGF3	0.370157	0.469881	0.495522	1.08226	7
c2.cgp	GOLUB_ALL_VS_AML_UP	0.0455732	0.0968949	0.473124	1.48086	24
c2.cgp	HOUSTIS_ROS	0.422152	0.519352	-0.297968	-1.01865	36
c2.cgp	BASSO_B_LYMPHOCYTE_NETWORK	0.000219587	0.00131152	0.446208	2.00136	143
c2.cgp	BYSTRYKH_HEMATOPOIESIS_STEM_CELL_QTL_CIS	0.314323	0.418841	-0.247829	-1.06419	127
c2.cgp	SCHUHMACHER_MYC_TARGETS_DN	0.00689223	0.0206957	-0.789816	-1.75322	7
c2.cgp	LEI_HOXC8_TARGETS_DN	0.319484	0.424335	-0.388914	-1.10526	17
c2.cgp	CHESLER_BRAIN_QTL_CIS	0.523719	0.612723	0.240508	0.969653	75
c2.cgp	ROSS_AML_WITH_CBFB_MYH11_FUSION	0.000193461	0.00131152	-0.617161	-2.27476	51
c2.cgp	IIZUKA_LIVER_CANCER_PROGRESSION_L0_L1_UP	0.388809	0.487315	-0.377819	-1.05338	16
c2.cgp	IIZUKA_LIVER_CANCER_PROGRESSION_L1_G1_DN	0.440234	0.53436	0.394342	1.01575	12
c2.cgp	FERRANDO_TAL1_NEIGHBORS	0.268974	0.374912	-0.378826	-1.14255	21
c2.cgp	BYSTRYKH_HEMATOPOIESIS_STEM_CELL_AND_BRAIN_QTL_TRANS	0.0164121	0.0424586	0.290438	1.34261	183
c2.cgp	PENG_LEUCINE_DEPRIVATION_UP	0.0134184	0.036233	0.309155	1.38383	142
c2.cgp	LEE_LIVER_CANCER_MYC_TGFA_DN	0.623621	0.691034	-0.237863	-0.916404	64
c2.cgp	IIZUKA_LIVER_CANCER_PROGRESSION_G1_G2_DN	0.00807754	0.0235625	0.544296	1.72105	25
c2.cgp	GOLDRATH_HOMEOSTATIC_PROLIFERATION	0.000674006	0.00299456	0.344935	1.58261	171
c2.cgp	LAMB_CCND1_TARGETS	0.261593	0.367759	0.39053	1.15515	19
c2.cgp	GNATENKO_PLATELET_SIGNATURE	0.0891012	0.163227	-0.370004	-1.31949	44
c2.cgp	KIM_GERMINAL_CENTER_T_HELPER_UP	0.106517	0.187295	-0.327211	-1.26571	66
c2.cgp	SHEPARD_BMYB_MORPHOLINO_DN	0.000228676	0.00131152	0.456877	2.13505	197
c2.cgp	BYSTRYKH_HEMATOPOIESIS_STEM_CELL_AND_BRAIN_QTL_CIS	0.626529	0.691678	0.233951	0.916483	65
c2.cgp	LEE_LIVER_CANCER_ACOX1_DN	0.348612	0.452186	-0.275056	-1.05969	64
c2.cgp	PENG_GLUCOSE_DEPRIVATION_UP	0.0123865	0.0338094	0.430371	1.56913	45
c2.cgp	SMITH_TERT_TARGETS_UP	0.00044082	0.00206812	0.366286	1.64715	145
c2.cgp	LEE_LIVER_CANCER_MYC_UP	0.351162	0.454346	0.281747	1.05856	52
c2.cgp	MENSSEN_MYC_TARGETS	0.000205719	0.00131152	0.597458	2.24472	52
c2.cgp	IIZUKA_LIVER_CANCER_PROGRESSION_L0_L1_DN	0.243271	0.348138	-0.387122	-1.16756	21
c2.cgp	JECHLINGER_EPITHELIAL_TO_MESENCHYMAL_TRANSITION_UP	0.408287	0.504764	-0.26103	-1.02276	71
c2.cgp	DER_IFN_ALPHA_RESPONSE_UP	0.0901872	0.16448	-0.322644	-1.27197	73
c2.cgp	KANNAN_TP53_TARGETS_UP	0.0415695	0.0904663	-0.371749	-1.40226	58
c2.cgp	PENG_GLUTAMINE_DEPRIVATION_UP	0.634837	0.699433	0.257328	0.895557	37
c2.cgp	WELCH_GATA1_TARGETS	0.140871	0.230439	-0.422783	-1.28999	22
c2.cgp	FRASOR_RESPONSE_TO_ESTRADIOL_UP	0.471635	0.564925	-0.287339	-0.988547	37
c2.cgp	LEE_LIVER_CANCER_MYC_TGFA_UP	0.64021	0.703635	-0.23876	-0.905315	60
c2.cgp	FLECHNER_PBL_KIDNEY_TRANSPLANT_OK_VS_DONOR_DN	0.000786473	0.00340181	-0.528486	-1.8556	41
c2.cgp	DORSAM_HOXA9_TARGETS_UP	0.457019	0.550194	-0.293037	-0.995884	35
c2.cgp	DER_IFN_BETA_RESPONSE_DN	0.356307	0.45817	-0.494044	-1.09667	7
c2.cgp	IIZUKA_LIVER_CANCER_PROGRESSION_G2_G3_UP	0.102738	0.182783	-0.411845	-1.33035	28
c2.cgp	NING_CHRONIC_OBSTRUCTIVE_PULMONARY_DISEASE_DN	0.00168067	0.00645047	-0.39609	-1.67077	113
c2.cgp	KLEIN_PRIMARY_EFFUSION_LYMPHOMA_DN	0.00735864	0.0218951	-0.428418	-1.61079	57
c2.cgp	SHEPARD_BMYB_TARGETS	0.000212179	0.00131152	0.583224	2.3389	73
c2.cgp	KANNAN_TP53_TARGETS_DN	0.351512	0.454346	0.354164	1.07177	21
c2.cgp	CHANG_POU5F1_TARGETS_UP	0.282109	0.387767	-0.418162	-1.14911	15
c2.cgp	CHANG_POU5F1_TARGETS_DN	0.886643	0.900411	-0.281744	-0.651715	8
c2.cgp	SANA_TNF_SIGNALING_DN	0.000188537	0.00131152	-0.593008	-2.40205	86
c2.cgp	TARTE_PLASMA_CELL_VS_PLASMABLAST_UP	0.000167926	0.00131152	-0.367196	-1.78835	379
c2.cgp	WILLERT_WNT_SIGNALING	0.185388	0.2817	-0.409056	-1.23372	21
c2.cgp	PENG_LEUCINE_DEPRIVATION_DN	0.000228519	0.00131152	0.518218	2.40259	187
c2.cgp	BYSTRYKH_HEMATOPOIESIS_STEM_CELL_RUNX1	0.0919732	0.167047	-0.597781	-1.42545	9
c2.cgp	KENNY_CTNNB1_TARGETS_DN	0.971795	0.975974	-0.178867	-0.661216	52
c2.cgp	CHEOK_RESPONSE_TO_MERCAPTOPURINE_AND_LD_MTX_UP	0.319083	0.423975	0.461829	1.13069	10
c2.cgp	WONG_IFNA2_RESISTANCE_UP	0.617568	0.685256	-0.320482	-0.893519	16
c2.cgp	CHESLER_BRAIN_QTL_TRANS	0.754268	0.790766	-0.361911	-0.765642	6
c2.cgp	IIZUKA_LIVER_CANCER_PROGRESSION_G1_G2_UP	0.00327735	0.0112219	-0.704314	-1.83173	12
c2.cgp	BECKER_TAMOXIFEN_RESISTANCE_UP	0.767279	0.80083	0.224447	0.836533	50
c2.cgp	SHEPARD_CRUSH_AND_BURN_MUTANT_DN	0.000228102	0.00131152	0.453815	2.10065	184
c2.cgp	KIM_GERMINAL_CENTER_T_HELPER_DN	0.00020016	0.00131152	-0.709752	-2.18817	23
c2.cgp	RADAEVA_RESPONSE_TO_IFNA1_UP	0.275663	0.381311	0.294203	1.10536	52
c2.cgp	PEART_HDAC_PROLIFERATION_CLUSTER_UP	0.151509	0.243218	0.316967	1.21292	57
c2.cgp	TARTE_PLASMA_CELL_VS_B_LYMPHOCYTE_DN	0.0023753	0.00858256	-0.508771	-1.75766	38
c2.cgp	KUROKAWA_LIVER_CANCER_CHEMOTHERAPY_DN	0.00322906	0.0110914	0.488436	1.73768	40
c2.cgp	PARK_HSC_VS_MULTIPOTENT_PROGENITORS_UP	0.139644	0.229005	-0.443153	-1.29793	19
c2.cgp	YAGI_AML_RELAPSE_PROGNOSIS	0.244828	0.349754	0.334021	1.14904	35
c2.cgp	SHIPP_DLBCL_CURED_VS_FATAL_UP	0.166071	0.259834	-0.352582	-1.22357	39
c2.cgp	FLECHNER_BIOPSY_KIDNEY_TRANSPLANT_REJECTED_VS_OK_UP	0.000188537	0.00131152	-0.53672	-2.17405	86
c2.cgp	LEE_LIVER_CANCER_ACOX1_UP	0.0431365	0.0928854	-0.363145	-1.39196	63
c2.cgp	IIZUKA_LIVER_CANCER_PROGRESSION_G2_G3_DN	0.74128	0.782183	0.330503	0.782114	9
c2.cgp	CHEOK_RESPONSE_TO_MERCAPTOPURINE_UP	0.539168	0.625427	0.354064	0.934805	13
c2.cgp	UEDA_PERIFERAL_CLOCK	0.284374	0.390223	-0.241464	-1.07411	168
c2.cgp	CHESLER_BRAIN_HIGHEST_GENETIC_VARIANCE	0.392654	0.490988	0.298917	1.03331	36
c2.cgp	CHEN_LUNG_CANCER_SURVIVAL	0.0537482	0.110539	0.448901	1.44651	27
c2.cgp	POMEROY_MEDULLOBLASTOMA_DESMOPLASIC_VS_CLASSIC_UP	0.117085	0.201192	0.319816	1.24576	62
c2.cgp	WIELAND_UP_BY_HBV_INFECTION	0.000185839	0.00131152	-0.442659	-1.83624	100
c2.cgp	SHEPARD_BMYB_MORPHOLINO_UP	0.0630011	0.125312	0.261569	1.22538	201
c2.cgp	GOLUB_ALL_VS_AML_DN	0.000199164	0.00131152	-0.705407	-2.20141	24
c2.cgp	DISTECHE_ESCAPED_FROM_X_INACTIVATION	0.598828	0.670376	0.348642	0.898036	12
c2.cgp	DER_IFN_BETA_RESPONSE_UP	0.407758	0.5043	-0.245393	-1.01988	101
c2.cgp	MANALO_HYPOXIA_DN	0.000238436	0.00131152	0.684358	3.35444	286
c2.cgp	CHESLER_BRAIN_HIGHEST_EXPRESSION	0.106598	0.187305	-0.37218	-1.3011	40
c2.cgp	MAGRANGEAS_MULTIPLE_MYELOMA_IGG_VS_IGA_DN	0.106535	0.187295	-0.423532	-1.3392	25
c2.cgp	LEE_LIVER_CANCER_MYC_E2F1_DN	0.54352	0.628469	-0.248887	-0.954	63
c2.cgp	BYSTROEM_CORRELATED_WITH_IL5_UP	0.304171	0.40966	-0.298539	-1.09572	50
c2.cgp	ZUCCHI_METASTASIS_UP	0.0410152	0.0894728	0.399811	1.43686	42
c2.cgp	CHESLER_BRAIN_D6MIT150_QTL_TRANS	0.467804	0.560953	0.423252	1.0016	9
c2.cgp	NELSON_RESPONSE_TO_ANDROGEN_UP	0.0346908	0.0783959	-0.345138	-1.39802	86
c2.cgp	LIN_APC_TARGETS	0.0112646	0.0311109	0.365645	1.48179	77
c2.cgp	VANTVEER_BREAST_CANCER_METASTASIS_DN	0.000218436	0.00131152	0.621043	2.7053	120
c2.cgp	BROCKE_APOPTOSIS_REVERSED_BY_IL6	0.000183284	0.00131152	-0.478123	-2.08158	142
c2.cgp	POMEROY_MEDULLOBLASTOMA_DESMOPLASIC_VS_CLASSIC_DN	0.53608	0.622951	-0.258781	-0.953827	51
c2.cgp	FRASOR_RESPONSE_TO_ESTRADIOL_DN	0.00452659	0.0145545	-0.395878	-1.59155	82
c2.cgp	CHEOK_RESPONSE_TO_HD_MTX_DN	0.339175	0.443186	-0.345817	-1.07921	24
c2.cgp	TENEDINI_MEGAKARYOCYTE_MARKERS	0.000190549	0.00131152	-0.51683	-1.99919	66
c2.cgp	TARTE_PLASMA_CELL_VS_PLASMABLAST_DN	0.000243546	0.00131152	0.522341	2.5767	305
c2.cgp	SMITH_LIVER_CANCER	0.0340628	0.0773505	0.39741	1.44896	45
c2.cgp	JECHLINGER_EPITHELIAL_TO_MESENCHYMAL_TRANSITION_DN	0.000190114	0.00131152	-0.507007	-1.95582	65
c2.cgp	ROSS_AML_WITH_MLL_FUSIONS	0.000189394	0.00131152	-0.5649	-2.2374	75
c2.cgp	GRANDVAUX_IRF3_TARGETS_UP	0.166598	0.260267	-0.464914	-1.27759	15
c2.cgp	KUROKAWA_LIVER_CANCER_CHEMOTHERAPY_UP	0.138867	0.22828	0.517654	1.33338	12
c2.cgp	LEE_LIVER_CANCER_MYC_E2F1_UP	0.119381	0.204172	0.328772	1.25536	56
c2.cgp	ASTON_MAJOR_DEPRESSIVE_DISORDER_UP	0.0310002	0.07164	-0.400341	-1.46255	49
c2.cgp	LE_EGR2_TARGETS_UP	0.000216403	0.00131152	0.623113	2.66854	107
c2.cgp	FERNANDEZ_BOUND_BY_MYC	0.083144	0.154654	0.261974	1.20653	177
c2.cgp	FLECHNER_PBL_KIDNEY_TRANSPLANT_OK_VS_DONOR_UP	0.279519	0.38534	-0.247359	-1.08125	147
c2.cgp	ROSS_AML_OF_FAB_M7_TYPE	0.0179424	0.0456943	-0.380659	-1.47976	68
c2.cgp	MOOTHA_VOXPHOS	0.00127714	0.00514316	0.408821	1.6925	86
c2.cgp	FLECHNER_PBL_KIDNEY_TRANSPLANT_REJECTED_VS_OK_DN	0.759081	0.794048	0.22701	0.84305	49
c2.cgp	DER_IFN_GAMMA_RESPONSE_DN	0.038193	0.0847294	-0.621699	-1.5738	11
c2.cgp	SANA_RESPONSE_TO_IFNG_UP	0.00132275	0.00527487	-0.426745	-1.69569	76
c2.cgp	SANA_TNF_SIGNALING_UP	0.024925	0.0601512	-0.355572	-1.4341	83
c2.cgp	POMEROY_MEDULLOBLASTOMA_PROGNOSIS_UP	0.337922	0.442355	-0.297718	-1.06828	45
c2.cgp	SCHUHMACHER_MYC_TARGETS_UP	0.000213356	0.00131152	0.63903	2.60789	80
c2.cgp	SWEET_KRAS_TARGETS_UP	0.00716711	0.0214423	-0.383459	-1.54162	82
c2.cgp	CHEOK_RESPONSE_TO_HD_MTX_UP	0.00362757	0.0121663	-0.585426	-1.78625	22
c2.cgp	MAGRANGEAS_MULTIPLE_MYELOMA_IGG_VS_IGA_UP	0.0890508	0.163227	-0.461627	-1.39227	21
c2.cgp	OKUMURA_INFLAMMATORY_RESPONSE_LPS	0.0683396	0.133097	-0.277592	-1.24798	181
c2.cgp	SMITH_TERT_TARGETS_DN	0.0241373	0.0585092	-0.351395	-1.42642	87
c2.cgp	SHIPP_DLBCL_VS_FOLLICULAR_LYMPHOMA_DN	0.000193874	0.00131152	-0.570686	-2.04776	45
c2.cgp	LEE_LIVER_CANCER_DENA_DN	0.058045	0.117455	-0.337556	-1.33076	73
c2.cgp	SANA_RESPONSE_TO_IFNG_DN	0.00853424	0.0247183	0.370761	1.51308	80
c2.cgp	CHEOK_RESPONSE_TO_MERCAPTOPURINE_AND_LD_MTX_DN	0.346286	0.449704	-0.356669	-1.07572	21
c2.cgp	LEE_LIVER_CANCER_MYC_DN	0.275024	0.380957	-0.289788	-1.10695	62
c2.cgp	LEE_LIVER_CANCER_CIPROFIBRATE_UP	0.0166893	0.0430395	-0.39821	-1.50991	60
c2.cgp	IIZUKA_LIVER_CANCER_PROGRESSION_L1_G1_UP	0.000199164	0.00131152	-0.677783	-2.1152	24
c2.cgp	POMEROY_MEDULLOBLASTOMA_PROGNOSIS_DN	0.000203417	0.00131152	0.597208	2.13242	41
c2.cgp	LU_IL4_SIGNALING	0.000186289	0.00131152	-0.492908	-2.02453	93
c2.cgp	BYSTRYKH_HEMATOPOIESIS_STEM_CELL_FLI1	0.536604	0.623338	0.397648	0.941006	9
c2.cgp	MAGRANGEAS_MULTIPLE_MYELOMA_IGLL_VS_IGLK_DN	0.00460368	0.0147733	-0.576446	-1.77719	23
c2.cgp	FERRANDO_LYL1_NEIGHBORS	0.0262618	0.0628208	-0.584865	-1.60721	15
c2.cgp	PENG_GLUCOSE_DEPRIVATION_DN	0.0874747	0.160788	0.265105	1.21102	167
c2.cgp	VANTVEER_BREAST_CANCER_METASTASIS_UP	0.0578416	0.117116	-0.366458	-1.3739	56
c2.cgp	COLLER_MYC_TARGETS_UP	0.00662518	0.020041	0.56005	1.75294	24
c2.cgp	MANALO_HYPOXIA_UP	0.000177085	0.00131152	-0.386281	-1.76068	204
c2.cgp	REN_BOUND_BY_E2F	0.000207082	0.00131152	0.755707	2.93422	61
c2.cgp	WONG_IFNA2_RESISTANCE_DN	0.322734	0.426424	-0.323159	-1.08289	33
c2.cgp	DORSAM_HOXA9_TARGETS_DN	0.00946186	0.0268579	-0.498851	-1.66305	32
c2.cgp	YE_METASTATIC_LIVER_CANCER	0.363801	0.465056	0.330019	1.05488	26
c2.cgp	SHIPP_DLBCL_VS_FOLLICULAR_LYMPHOMA_UP	0.000205212	0.00131152	0.705675	2.55975	44
c2.cgp	GRANDVAUX_IRF3_TARGETS_DN	0.300348	0.406345	-0.38306	-1.12193	19
c2.cgp	IIZUKA_LIVER_CANCER_EARLY_RECURRENCE	0.00205339	0.00764433	-0.755533	-1.9126	11
c2.cgp	RADAEVA_RESPONSE_TO_IFNA1_DN	0.938186	0.945414	0.246905	0.604495	10
c2.cgp	BECKER_TAMOXIFEN_RESISTANCE_DN	0.549893	0.634145	-0.255819	-0.945682	52
c2.cgp	PEART_HDAC_PROLIFERATION_CLUSTER_DN	0.000212314	0.00131152	0.486028	1.96455	76
c2.cgp	NING_CHRONIC_OBSTRUCTIVE_PULMONARY_DISEASE_UP	0.00018205	0.00131152	-0.482113	-2.11455	151
c2.cgp	KLEIN_PRIMARY_EFFUSION_LYMPHOMA_UP	0.13503	0.22371	0.334207	1.24115	49
c2.cgp	SASAKI_ADULT_T_CELL_LEUKEMIA	0.000226193	0.00131152	0.463877	2.13111	174
c2.cgp	PENG_RAPAMYCIN_RESPONSE_DN	0.000235018	0.00131152	0.487461	2.34212	244
c2.cgp	COLLER_MYC_TARGETS_DN	0.0710702	0.137515	-0.6195	-1.47724	9
c2.cgp	LEE_LIVER_CANCER_E2F1_DN	0.285851	0.391922	-0.286876	-1.09962	63
c2.cgp	LEE_LIVER_CANCER_DENA_UP	0.198331	0.297633	-0.30875	-1.1707	60
c2.cgp	FLECHNER_BIOPSY_KIDNEY_TRANSPLANT_OK_VS_DONOR_DN	0.788887	0.81946	-0.252102	-0.78675	24
c2.cgp	PENG_RAPAMYCIN_RESPONSE_UP	0.517058	0.606448	-0.214767	-0.974597	196
c2.cgp	PENG_GLUTAMINE_DEPRIVATION_DN	0.000245038	0.00131152	0.498001	2.48536	336
c2.cgp	MAGRANGEAS_MULTIPLE_MYELOMA_IGLL_VS_IGLK_UP	0.754111	0.790766	-0.238133	-0.832492	40
c2.cgp	FLECHNER_PBL_KIDNEY_TRANSPLANT_REJECTED_VS_OK_UP	0.508149	0.598792	0.249463	0.973052	63
c2.cgp	GOLDRATH_IMMUNE_MEMORY	0.000190114	0.00131152	-0.526167	-2.02973	65
c2.cgp	LEE_LIVER_CANCER_E2F1_UP	0.0418515	0.0908125	-0.365272	-1.39529	62
c2.cgp	ROSS_AML_WITH_AML1_ETO_FUSION	0.00170068	0.00651197	-0.422996	-1.6808	76
c2.cgp	BHATTACHARYA_EMBRYONIC_STEM_CELL	0.000213129	0.00131152	0.57998	2.39132	84
c2.cgp	OSAWA_TNF_TARGETS	0.508569	0.598855	0.395091	0.967297	10
c2.cgp	DER_IFN_GAMMA_RESPONSE_UP	0.110055	0.191936	-0.319881	-1.2508	70
c2.cgp	HASLINGER_B_CLL_WITH_17P13_DELETION	0.635904	0.700372	-0.291425	-0.878942	21
c2.cgp	YAO_HOXA10_TARGETS_VIA_PROGESTERONE_UP	0.000187758	0.00131152	-0.633059	-2.52867	78
c2.cgp	ZHAN_MULTIPLE_MYELOMA_CD1_UP	0.250731	0.356319	-0.318996	-1.13759	44
c2.cgp	ABBUD_LIF_SIGNALING_1_DN	0.00557325	0.0174555	-0.54811	-1.74354	26
c2.cgp	SANSOM_APC_TARGETS_UP	0.000433557	0.00203697	0.396711	1.74275	125
c2.cgp	NAKAJIMA_EOSINOPHIL	0.00238806	0.00860702	-0.567071	-1.84818	29
c2.cgp	BROWN_MYELOID_CELL_DEVELOPMENT_UP	0.000181324	0.00131152	-0.558714	-2.47392	162
c2.cgp	NADLER_OBESITY_UP	0.0150783	0.0397629	-0.400063	-1.52413	61
c2.cgp	SANSOM_APC_TARGETS_DN	0.00016835	0.00131152	-0.349434	-1.69371	361
c2.cgp	ADDYA_ERYTHROID_DIFFERENTIATION_BY_HEMIN	0.000380156	0.00188922	-0.495929	-1.94313	71
c2.cgp	ZHANG_TARGETS_OF_EWSR1_FLI1_FUSION	0.000377145	0.00188676	-0.455331	-1.84832	87
c2.cgp	ZHAN_MULTIPLE_MYELOMA_SUBGROUPS	0.000200924	0.00131152	0.724604	2.3805	29
c2.cgp	SCHURINGA_STAT5A_TARGETS_UP	0.0451326	0.0962307	-0.49825	-1.50273	21
c2.cgp	HADDAD_T_LYMPHOCYTE_AND_NK_PROGENITOR_UP	0.000377572	0.00188676	-0.493428	-1.96534	77
c2.cgp	MA_MYELOID_DIFFERENTIATION_DN	0.25619	0.362189	-0.317521	-1.13233	44
c2.cgp	GALINDO_IMMUNE_RESPONSE_TO_ENTEROTOXIN	0.000749625	0.00328712	-0.445214	-1.79565	83
c2.cgp	VERNELL_RETINOBLASTOMA_PATHWAY_DN	0.159684	0.252133	-0.420967	-1.26964	21
c2.cgp	HASLINGER_B_CLL_WITH_MUTATED_VH_GENES	0.000408998	0.00196499	-0.719294	-2.07484	18
c2.cgp	CROMER_METASTASIS_UP	0.220616	0.324168	-0.284319	-1.13567	78
c2.cgp	ZHAN_MULTIPLE_MYELOMA_CD1_AND_CD2_DN	0.0967305	0.173987	-0.354212	-1.30557	51
c2.cgp	GUO_HEX_TARGETS_UP	0.0371204	0.0826047	-0.346192	-1.39149	81
c2.cgp	WANG_IMMORTALIZED_BY_HOXA9_AND_MEIS1_DN	0.000199164	0.00131152	-0.763684	-2.38328	24
c2.cgp	ALCALAY_AML_BY_NPM1_LOCALIZATION_UP	0.0208868	0.0517815	-0.319757	-1.38628	138
c2.cgp	FAELT_B_CLL_WITH_VH_REARRANGEMENTS_UP	0.000585366	0.00265854	-0.514706	-1.87143	48
c2.cgp	HEDVAT_ELF4_TARGETS_UP	0.0188447	0.0474382	-0.643743	-1.6742	12
c2.cgp	XU_RESPONSE_TO_TRETINOIN_AND_NSC682994_UP	0.279984	0.385818	-0.401401	-1.14074	17
c2.cgp	STOSSI_RESPONSE_TO_ESTRADIOL	0.0294404	0.0687818	-0.40228	-1.46963	49
c2.cgp	YU_MYC_TARGETS_UP	0.000203046	0.00131152	0.774052	2.78183	42
c2.cgp	MOREAUX_B_LYMPHOCYTE_MATURATION_BY_TACI_DN	0.000212179	0.00131152	0.574207	2.30274	73
c2.cgp	ABBUD_LIF_SIGNALING_2_UP	0.477557	0.570347	-0.364871	-0.987618	14
c2.cgp	PARK_HSC_MARKERS	0.12468	0.210591	-0.360102	-1.27173	42
c2.cgp	FERRANDO_T_ALL_WITH_MLL_ENL_FUSION_UP	0.000565718	0.00259992	-0.451094	-1.83113	87
c2.cgp	HOFMANN_CELL_LYMPHOMA_DN	0.170635	0.264946	-0.350634	-1.21681	39
c2.cgp	ZHAN_MULTIPLE_MYELOMA_CD1_VS_CD2_UP	0.178406	0.274664	0.300999	1.17913	65
c2.cgp	MATSUDA_NATURAL_KILLER_DIFFERENTIATION	0.0257707	0.0618723	-0.24897	-1.23772	471
c2.cgp	WANG_TARGETS_OF_MLL_CBP_FUSION_UP	0.19575	0.29457	-0.332867	-1.18705	44
c2.cgp	STONER_ESOPHAGEAL_CARCINOGENESIS_UP	0.15397	0.245961	0.35002	1.2383	39
c2.cgp	STONER_ESOPHAGEAL_CARCINOGENESIS_DN	0.118143	0.202797	0.62902	1.37383	7
c2.cgp	HASLINGER_B_CLL_WITH_13Q14_DELETION	0.0304243	0.0704586	-0.503396	-1.55197	23
c2.cgp	HOFMANN_CELL_LYMPHOMA_UP	0.254463	0.360683	0.302068	1.12179	49
c2.cgp	GUO_HEX_TARGETS_DN	0.00893876	0.0256852	-0.41155	-1.58556	64
c2.cgp	HSIAO_LIVER_SPECIFIC_GENES	0.0292836	0.068496	-0.279639	-1.29905	241
c2.cgp	GILDEA_METASTASIS	0.0313492	0.0722933	-0.466857	-1.53157	30
c2.cgp	ZHAN_MULTIPLE_MYELOMA_SPIKED	0.128174	0.215399	-0.429099	-1.30926	22
c2.cgp	MUNSHI_MULTIPLE_MYELOMA_DN	0.143804	0.233253	0.525008	1.32001	11
c2.cgp	ASTIER_INTEGRIN_SIGNALING	0.114247	0.197818	-0.333982	-1.26252	59
c2.cgp	ZHAN_MULTIPLE_MYELOMA_LB_UP	0.096369	0.173528	-0.369104	-1.30945	43
c2.cgp	HASLINGER_B_CLL_WITH_11Q23_DELETION	0.914331	0.923938	-0.220175	-0.678801	23
c2.cgp	LEI_MYB_TARGETS	0.000243013	0.00131152	0.305049	1.51161	315
c2.cgp	BROWN_MYELOID_CELL_DEVELOPMENT_DN	0.000218103	0.00131152	0.429145	1.89078	128
c2.cgp	ROETH_TERT_TARGETS_DN	0.00166701	0.00640556	-0.829196	-1.91805	8
c2.cgp	NEMETH_INFLAMMATORY_RESPONSE_LPS_UP	0.000188537	0.00131152	-0.585591	-2.372	86
c2.cgp	LI_WILMS_TUMOR_VS_FETAL_KIDNEY_1_DN	0.000223065	0.00131152	0.663299	3.02306	163
c2.cgp	HESS_TARGETS_OF_HOXA9_AND_MEIS1_DN	0.000189394	0.00131152	-0.680713	-2.69611	75
c2.cgp	HALMOS_CEBPA_TARGETS_DN	0.0651415	0.128391	-0.380374	-1.36488	45
c2.cgp	NADLER_OBESITY_DN	0.157854	0.250301	-0.336728	-1.22432	48
c2.cgp	FERRANDO_T_ALL_WITH_MLL_ENL_FUSION_DN	0.000212811	0.00131152	0.530763	2.20094	87
c2.cgp	WANG_IMMORTALIZED_BY_HOXA9_AND_MEIS1_UP	0.00337235	0.0114308	-0.543107	-1.79499	31
c2.cgp	NEMETH_INFLAMMATORY_RESPONSE_LPS_DN	0.0182593	0.0462852	0.467789	1.57342	32
c2.cgp	GALE_APL_WITH_FLT3_MUTATED_DN	0.275215	0.381013	0.399564	1.14182	17
c2.cgp	ZHAN_MULTIPLE_MYELOMA_CD1_AND_CD2_UP	0.0169332	0.0435997	-0.355863	-1.44979	89
c2.cgp	NADLER_HYPERGLYCEMIA_AT_OBESITY	0.39143	0.490224	0.269013	1.03344	58
c2.cgp	RORIE_TARGETS_OF_EWSR1_FLI1_FUSION_UP	0.15496	0.247019	-0.381149	-1.2504	30
c2.cgp	ZHAN_MULTIPLE_MYELOMA_PR_UP	0.000206441	0.00131152	0.868115	3.16514	45
c2.cgp	HALMOS_CEBPA_TARGETS_UP	0.0013616	0.00539561	-0.478831	-1.77009	52
c2.cgp	YU_MYC_TARGETS_DN	0.000387747	0.00191613	-0.497224	-1.8513	54
c2.cgp	NUMATA_CSF3_SIGNALING_VIA_STAT3	0.255744	0.36187	-0.378838	-1.15591	22
c2.cgp	ZHAN_MULTIPLE_MYELOMA_UP	0.0333052	0.0759471	0.360193	1.40546	64
c2.cgp	LENAOUR_DENDRITIC_CELL_MATURATION_UP	0.000186811	0.00131152	-0.432858	-1.82452	112
c2.cgp	TAVOR_CEBPA_TARGETS_DN	0.0263889	0.0630787	-0.475257	-1.55913	30
c2.cgp	LENAOUR_DENDRITIC_CELL_MATURATION_DN	0.000184604	0.00131152	-0.434871	-1.8686	128
c2.cgp	WANG_TARGETS_OF_MLL_CBP_FUSION_DN	0.0887696	0.162894	0.361403	1.31767	45
c2.cgp	HADDAD_B_LYMPHOCYTE_PROGENITOR	0.000172176	0.00131152	-0.332882	-1.57712	286
c2.cgp	PARK_HSC_AND_MULTIPOTENT_PROGENITORS	0.410996	0.507154	-0.280738	-1.02561	49
c2.cgp	GREENBAUM_E2A_TARGETS_DN	0.0695154	0.134825	-0.493145	-1.44435	19
c2.cgp	NGUYEN_NOTCH1_TARGETS_UP	0.807916	0.834719	0.240675	0.790676	29
c2.cgp	ZHAN_MULTIPLE_MYELOMA_CD2_UP	0.0697992	0.135295	-0.380981	-1.35864	44
c2.cgp	HASLINGER_B_CLL_WITH_CHROMOSOME_12_TRISOMY	0.879705	0.894476	-0.228903	-0.714352	24
c2.cgp	ABBUD_LIF_SIGNALING_1_UP	0.0449787	0.0960054	-0.395523	-1.41923	45
c2.cgp	ABRAHAM_ALPC_VS_MULTIPLE_MYELOMA_UP	0.00597134	0.0183863	-0.544321	-1.73148	26
c2.cgp	THEILGAARD_NEUTROPHIL_AT_SKIN_WOUND_UP	0.00699169	0.0209751	-0.389644	-1.54827	76
c2.cgp	GERY_CEBP_TARGETS	0.000185254	0.00131152	-0.470356	-2.01115	124
c2.cgp	VERHAAK_AML_WITH_NPM1_MUTATED_UP	0.000177936	0.00131152	-0.551198	-2.47243	178
c2.cgp	KANG_IMMORTALIZED_BY_TERT_UP	0.290025	0.396145	-0.267279	-1.08497	87
c2.cgp	BASSO_CD40_SIGNALING_DN	0.0185753	0.0470132	-0.381307	-1.47745	67
c2.cgp	ZHAN_MULTIPLE_MYELOMA_MF_UP	0.0625486	0.124792	-0.379703	-1.36916	46
c2.cgp	PETROVA_ENDOTHELIUM_LYMPHATIC_VS_BLOOD_DN	0.000726085	0.00321285	-0.376688	-1.66668	161
c2.cgp	JAIN_NFKB_SIGNALING	0.000211775	0.00131152	0.489828	1.97483	75
c2.cgp	ROETH_TERT_TARGETS_UP	0.470793	0.564124	-0.366751	-0.992709	14
c2.cgp	PETROVA_ENDOTHELIUM_LYMPHATIC_VS_BLOOD_UP	0.00565178	0.0175888	-0.350381	-1.51332	131
c2.cgp	LI_WILMS_TUMOR_VS_FETAL_KIDNEY_1_UP	0.000177936	0.00131152	-0.551051	-2.47934	182
c2.cgp	STAEGE_EWING_FAMILY_TUMOR	0.0767705	0.146208	-0.41701	-1.37824	31
c2.cgp	GALE_APL_WITH_FLT3_MUTATED_UP	0.0616495	0.123148	0.353868	1.35119	56
c2.cgp	AFFAR_YY1_TARGETS_UP	0.000176491	0.00131152	-0.427641	-1.95789	212
c2.cgp	THEILGAARD_NEUTROPHIL_AT_SKIN_WOUND_DN	0.0001755	0.00131152	-0.398431	-1.83639	225
c2.cgp	AFFAR_YY1_TARGETS_DN	0.000233973	0.00131152	0.464236	2.21518	231
c2.cgp	FAELT_B_CLL_WITH_VH_REARRANGEMENTS_DN	0.249366	0.354752	-0.312173	-1.13504	48
c2.cgp	VERNELL_RETINOBLASTOMA_PATHWAY_UP	0.000210926	0.00131152	0.676737	2.69426	70
c2.cgp	ALCALAY_AML_BY_NPM1_LOCALIZATION_DN	0.000228102	0.00131152	0.422441	1.95542	184
c2.cgp	KANG_IMMORTALIZED_BY_TERT_DN	0.00296956	0.0102974	-0.388653	-1.61528	101
c2.cgp	HESS_TARGETS_OF_HOXA9_AND_MEIS1_UP	0.000421763	0.00200169	0.457766	1.79326	65
c2.cgp	YAO_HOXA10_TARGETS_VIA_PROGESTERONE_DN	0.521775	0.610886	-0.326368	-0.955886	19
c2.cgp	NGUYEN_NOTCH1_TARGETS_DN	0.299105	0.405672	0.261889	1.0823	85
c2.cgp	MOREAUX_MULTIPLE_MYELOMA_BY_TACI_UP	0.0417293	0.0906662	-0.249205	-1.22167	403
c2.cgp	CHIARETTI_ACUTE_LYMPHOBLASTIC_LEUKEMIA_ZAP70	0.596323	0.668788	-0.239724	-0.928858	67
c2.cgp	PETROVA_PROX1_TARGETS_DN	0.000190186	0.00131152	-0.493177	-1.90004	64
c2.cgp	HOEGERKORP_CD44_TARGETS_DIRECT_DN	0.340849	0.444408	-0.404821	-1.09575	14
c2.cgp	BENNETT_SYSTEMIC_LUPUS_ERYTHEMATOSUS	0.181692	0.277631	-0.373255	-1.2165	29
c2.cgp	XU_RESPONSE_TO_TRETINOIN_UP	0.0455478	0.0968949	-0.553758	-1.52173	15
c2.cgp	ABRAHAM_ALPC_VS_MULTIPLE_MYELOMA_DN	0.0230875	0.0563403	0.545867	1.61463	19
c2.cgp	MENSE_HYPOXIA_UP	0.182172	0.278106	0.273133	1.1542	98
c2.cgp	MARCINIAK_ER_STRESS_RESPONSE_VIA_CHOP	0.441236	0.535179	0.318493	1.00706	25
c2.cgp	ZHAN_V2_LATE_DIFFERENTIATION_GENES	0.295623	0.401282	0.301444	1.09906	45
c2.cgp	DORSEY_GAB2_TARGETS	0.0351121	0.0790203	-0.454925	-1.50355	31
c2.cgp	HADDAD_T_LYMPHOCYTE_AND_NK_PROGENITOR_DN	0.0486963	0.102337	-0.357976	-1.37215	63
c2.cgp	NAKAJIMA_MAST_CELL	0.000193874	0.00131152	-0.560896	-2.01263	45
c2.cgp	LIAN_NEUTROPHIL_GRANULE_CONSTITUENTS	0.0534653	0.110026	-0.463183	-1.46457	25
c2.cgp	ZHAN_MULTIPLE_MYELOMA_MS_UP	0.00506132	0.0161154	-0.465464	-1.68341	47
c2.cgp	MA_MYELOID_DIFFERENTIATION_UP	0.0404762	0.0885332	-0.419437	-1.45557	39
c2.cgp	RADMACHER_AML_PROGNOSIS	0.000751033	0.00328765	-0.448089	-1.78984	78
c2.cgp	CROMER_METASTASIS_DN	0.0906763	0.16528	0.307921	1.25663	80
c2.cgp	NOUZOVA_METHYLATED_IN_APL	0.00133384	0.00530616	-0.456512	-1.76587	66
c2.cgp	ZHAN_MULTIPLE_MYELOMA_HP_UP	0.0339247	0.0771254	-0.396888	-1.44993	49
c2.cgp	XU_RESPONSE_TO_TRETINOIN_DN	0.791889	0.821795	-0.28943	-0.75273	12
c2.cgp	TAVOR_CEBPA_TARGETS_UP	0.000195122	0.00131152	-0.563472	-2.04874	48
c2.cgp	YAGI_AML_SURVIVAL	0.319808	0.424593	0.24073	1.05919	127
c2.cgp	XU_CREBBP_TARGETS_UP	0.000401526	0.00195969	0.64737	2.02625	24
c2.cgp	VERHAAK_AML_WITH_NPM1_MUTATED_DN	0.000173702	0.00131152	-0.46289	-2.15455	245
c2.cgp	RORIE_TARGETS_OF_EWSR1_FLI1_FUSION_DN	0.714881	0.764212	-0.256916	-0.842836	30
c2.cgp	APPEL_IMATINIB_RESPONSE	0.00158009	0.00613646	-0.543645	-1.82173	33
c2.cgp	YAGI_AML_FAB_MARKERS	0.000893975	0.00379649	-0.357861	-1.61441	189
c2.cgp	ZHAN_MULTIPLE_MYELOMA_CD1_VS_CD2_DN	0.128185	0.215399	-0.339121	-1.25362	52
c2.cgp	MOREAUX_MULTIPLE_MYELOMA_BY_TACI_DN	0.000224871	0.00131152	0.445242	2.03934	170
c2.cgp	ABBUD_LIF_SIGNALING_2_DN	0.625313	0.691678	-0.391689	-0.869467	7
c2.cgp	XU_CREBBP_TARGETS_DN	0.101774	0.181462	-0.363696	-1.297	44
c2.cgp	IGLESIAS_E2F_TARGETS_DN	0.509523	0.599762	-0.361274	-0.959563	13
c2.cgp	HOEGERKORP_CD44_TARGETS_TEMPORAL_UP	0.54281	0.628093	-0.359678	-0.935427	12
c2.cgp	SCHURINGA_STAT5A_TARGETS_DN	0.00204666	0.00763123	-0.656063	-1.86447	17
c2.cgp	HOEGERKORP_CD44_TARGETS_TEMPORAL_DN	0.560594	0.642393	-0.295014	-0.932829	25
c2.cgp	IGLESIAS_E2F_TARGETS_UP	0.000181752	0.00131152	-0.468925	-2.05253	148
c2.cgp	MUNSHI_MULTIPLE_MYELOMA_UP	0.190851	0.28826	-0.287501	-1.15558	81
c2.cgp	KAMMINGA_EZH2_TARGETS	0.000203417	0.00131152	0.82081	2.93082	41
c2.cgp	ZHAN_MULTIPLE_MYELOMA_DN	0.00373575	0.0124652	-0.48232	-1.6935	41
c2.cgp	BASSO_CD40_SIGNALING_UP	0.000743771	0.00328223	-0.414682	-1.71467	97
c2.cgp	HASLINGER_B_CLL_WITH_6Q21_DELETION	0.0532185	0.109777	0.501695	1.48397	19
c2.cgp	HANSON_HRAS_SIGNALING_VIA_NFKB	0.108424	0.1898	-0.440486	-1.34401	22
c2.cgp	FAELT_B_CLL_WITH_VH3_21_DN	0.0124781	0.0340027	-0.430025	-1.57099	49
c2.cgp	GREENBAUM_E2A_TARGETS_UP	0.00020247	0.00131152	0.809346	2.74425	33
c2.cgp	XU_RESPONSE_TO_TRETINOIN_AND_NSC682994_DN	0.00527035	0.0166512	0.65521	1.77228	14
c2.cgp	NOUZOVA_TRETINOIN_AND_H4_ACETYLATION	0.00507726	0.0161504	0.331251	1.47343	137
c2.cgp	BRUNO_HEMATOPOIESIS	0.0203499	0.0506811	-0.384138	-1.47995	64
c2.cgp	MOREAUX_B_LYMPHOCYTE_MATURATION_BY_TACI_UP	0.00790514	0.0231837	-0.377033	-1.53328	88
c2.cgp	PETROVA_PROX1_TARGETS_UP	0.00080016	0.00345188	0.601713	1.96197	28
c2.cgp	HOEGERKORP_CD44_TARGETS_DIRECT_UP	0.00258758	0.00919716	-0.567446	-1.80504	26
c2.cgp	KUMAR_TARGETS_OF_MLL_AF9_FUSION	0.0223893	0.0549235	-0.258701	-1.26719	398
c2.cgp	FAELT_B_CLL_WITH_VH3_21_UP	0.00246255	0.00880601	0.482534	1.75034	44
c2.cgp	SESTO_RESPONSE_TO_UV_C8	0.401184	0.49919	0.257765	1.03165	72
c2.cgp	KIM_HYPOXIA	0.016357	0.0423495	0.516559	1.63334	25
c2.cgp	GENTILE_UV_RESPONSE_CLUSTER_D9	0.0797521	0.150311	-0.425802	-1.37544	28
c2.cgp	LIANG_SILENCED_BY_METHYLATION_2	0.0975467	0.175263	-0.348844	-1.29468	53
c2.cgp	LY_AGING_PREMATURE_DN	0.000201532	0.00131152	0.710304	2.35131	30
c2.cgp	MARTINEZ_RESPONSE_TO_TRABECTEDIN	0.0777886	0.147546	-0.365427	-1.34122	50
c2.cgp	WEIGEL_OXIDATIVE_STRESS_BY_TBH_AND_H2O2	0.24168	0.346316	0.33237	1.14895	36
c2.cgp	BROWNE_HCMV_INFECTION_20HR_UP	0.0544598	0.111791	-0.268053	-1.24292	238
c2.cgp	TAKAO_RESPONSE_TO_UVB_RADIATION_UP	0.381269	0.479703	0.251955	1.03529	83
c2.cgp	URS_ADIPOCYTE_DIFFERENTIATION_UP	0.0349783	0.0787733	-0.354556	-1.39778	73
c2.cgp	LEE_AGING_NEOCORTEX_DN	0.604883	0.674844	0.230953	0.933523	76
c2.cgp	REN_ALVEOLAR_RHABDOMYOSARCOMA_UP	0.000185943	0.00131152	-0.509906	-2.10841	97
c2.cgp	REN_ALVEOLAR_RHABDOMYOSARCOMA_DN	0.000166583	0.00131152	-0.323363	-1.58658	407
c2.cgp	TRAYNOR_RETT_SYNDROM_UP	0.000974849	0.00409737	-0.497744	-1.77503	44
c2.cgp	MCCLUNG_DELTA_FOSB_TARGETS_8WK	0.257154	0.362923	-0.312063	-1.12862	47
c2.cgp	BRACHAT_RESPONSE_TO_METHOTREXATE_DN	0.104466	0.18485	0.411769	1.32685	27
c2.cgp	BROWNE_HCMV_INFECTION_16HR_UP	0.661457	0.720508	-0.201719	-0.929256	224
c2.cgp	MODY_HIPPOCAMPUS_POSTNATAL	0.109471	0.191121	-0.329376	-1.26252	63
c2.cgp	IYENGAR_RESPONSE_TO_ADIPOCYTE_FACTORS	0.877105	0.892944	-0.27467	-0.675761	10
c2.cgp	JAZAERI_BREAST_CANCER_BRCA1_VS_BRCA2_DN	0.00965137	0.0273483	-0.457742	-1.61656	42
c2.cgp	BURTON_ADIPOGENESIS_10	0.000995025	0.00416611	-0.598702	-1.95128	29
c2.cgp	ABE_VEGFA_TARGETS_2HR	0.0843373	0.156251	-0.399508	-1.34843	34
c2.cgp	SUZUKI_RESPONSE_TO_TSA_AND_DECITABINE_1A	0.00261991	0.00928181	-0.5925	-1.80783	22
c2.cgp	NATSUME_RESPONSE_TO_INTERFERON_BETA_UP	0.0431477	0.0928854	-0.351884	-1.37874	71
c2.cgp	BLALOCK_ALZHEIMERS_DISEASE_INCIPIENT_UP	0.00016742	0.00131152	-0.32024	-1.56404	389
c2.cgp	IVANOVA_HEMATOPOIESIS_MATURE_CELL	0.000683878	0.0030343	-0.320814	-1.52355	291
c2.cgp	DAZARD_UV_RESPONSE_CLUSTER_G3	0.38471	0.483289	-0.390245	-1.0563	14
c2.cgp	SCHLINGEMANN_SKIN_CARCINOGENESIS_TPA_UP	0.206252	0.307405	-0.335536	-1.17812	41
c2.cgp	WEBER_METHYLATED_IN_COLON_CANCER	0.359937	0.461024	0.36747	1.06955	18
c2.cgp	KAAB_FAILED_HEART_ATRIUM_DN	0.220672	0.324168	-0.257023	-1.11568	140
c2.cgp	SU_PANCREAS	0.289136	0.395437	-0.296908	-1.10193	53
c2.cgp	RUAN_RESPONSE_TO_TROGLITAZONE_UP	0.113069	0.196355	-0.41978	-1.32734	25
c2.cgp	WU_HBX_TARGETS_2_DN	0.54801	0.632319	-0.341862	-0.939438	15
c2.cgp	ZAMORA_NOS2_TARGETS_UP	0.000210793	0.00131152	0.494594	1.92988	64
c2.cgp	JIANG_AGING_CEREBRAL_CORTEX_UP	0.0035475	0.0119468	-0.510019	-1.74358	36
c2.cgp	WEIGEL_OXIDATIVE_STRESS_RESPONSE	0.13712	0.226341	0.367438	1.264	35
c2.cgp	HEDENFALK_BREAST_CANCER_HEREDITARY_VS_SPORADIC	0.000410425	0.00196499	0.497415	1.84725	49
c2.cgp	DEBIASI_APOPTOSIS_BY_REOVIRUS_INFECTION_UP	0.0377902	0.0839497	-0.261862	-1.25177	311
c2.cgp	BRACHAT_RESPONSE_TO_CISPLATIN	0.0269176	0.0640616	-0.521159	-1.57182	21
c2.cgp	LU_AGING_BRAIN_DN	0.305288	0.410352	-0.243114	-1.06887	153
c2.cgp	RUAN_RESPONSE_TO_TNF_UP	0.52458	0.613434	-0.365078	-0.94947	12
c2.cgp	WHITESIDE_CISPLATIN_RESISTANCE_UP	0.475643	0.568477	0.395294	0.993876	11
c2.cgp	LEE_CALORIE_RESTRICTION_NEOCORTEX_UP	0.0848951	0.156929	-0.317259	-1.27958	83
c2.cgp	JOSEPH_RESPONSE_TO_SODIUM_BUTYRATE_DN	0.0216812	0.0533868	-0.382806	-1.47482	64
c2.cgp	IVANOVA_HEMATOPOIESIS_STEM_CELL_LONG_TERM	0.000171145	0.00131152	-0.380585	-1.80698	292
c2.cgp	WEIGEL_OXIDATIVE_STRESS_BY_HNE_AND_H2O2	0.258968	0.365169	0.320916	1.13534	39
c2.cgp	HU_GENOTOXIN_ACTION_DIRECT_VS_INDIRECT_4HR	0.220992	0.324347	-0.33905	-1.16645	37
c2.cgp	ZHOU_TNF_SIGNALING_4HR	0.55672	0.639886	0.250897	0.946466	53
c2.cgp	MARCHINI_TRABECTEDIN_RESISTANCE_UP	0.64238	0.704848	-0.290079	-0.874882	21
c2.cgp	GENTILE_UV_LOW_DOSE_UP	0.0642554	0.127106	0.4397	1.41686	27
c2.cgp	BROWNE_HCMV_INFECTION_16HR_DN	0.000188395	0.00131152	-0.512966	-2.07529	85
c2.cgp	WESTON_VEGFA_TARGETS_6HR	0.405411	0.502537	-0.271485	-1.02627	59
c2.cgp	BANDRES_RESPONSE_TO_CARMUSTIN_WITHOUT_MGMT_24HR_UP	0.323981	0.427702	-0.417471	-1.10883	13
c2.cgp	RAMALHO_STEMNESS_DN	0.000190078	0.00131152	-0.55495	-2.17439	71
c2.cgp	ONGUSAHA_TP53_TARGETS	0.715806	0.76468	-0.249057	-0.851442	36
c2.cgp	GENTILE_UV_RESPONSE_CLUSTER_D4	0.652713	0.71336	-0.239279	-0.894894	55
c2.cgp	RHODES_CANCER_META_SIGNATURE	0.000208943	0.00131152	0.773166	3.0158	63
c2.cgp	NIELSEN_MALIGNAT_FIBROUS_HISTIOCYTOMA_UP	0.15501	0.247019	-0.444966	-1.28353	18
c2.cgp	LIAN_LIPA_TARGETS_6M	0.000189072	0.00131152	-0.565185	-2.22815	73
c2.cgp	WU_HBX_TARGETS_1_DN	0.060258	0.121109	-0.478584	-1.46025	22
c2.cgp	NIELSEN_GIST_AND_SYNOVIAL_SARCOMA_DN	0.00795594	0.0232555	-0.584042	-1.73624	20
c2.cgp	HARRIS_HYPOXIA	0.0106678	0.0296883	0.367398	1.49935	80
c2.cgp	RUAN_RESPONSE_TO_TNF_TROGLITAZONE_DN	0.00137877	0.00543856	-0.49808	-1.75902	42
c2.cgp	SU_SALIVARY_GLAND	0.984983	0.986189	-0.184805	-0.515243	16
c2.cgp	BROWNE_HCMV_INFECTION_10HR_DN	0.124418	0.210256	-0.334276	-1.25324	56
c2.cgp	KAYO_CALORIE_RESTRICTION_MUSCLE_DN	0.731785	0.776152	0.212948	0.880044	85
c2.cgp	HENDRICKS_SMARCA4_TARGETS_UP	0.231722	0.336322	0.299496	1.13872	55
c2.cgp	ZHENG_RESPONSE_TO_ARSENITE_DN	0.18773	0.284466	-0.429685	-1.23945	18
c2.cgp	MURAKAMI_UV_RESPONSE_6HR_DN	0.510018	0.600129	-0.31814	-0.959514	21
c2.cgp	CHEN_LVAD_SUPPORT_OF_FAILING_HEART_DN	0.000196967	0.00131152	-0.585588	-2.06806	42
c2.cgp	RAMALHO_STEMNESS_UP	0.000229621	0.00131152	0.373285	1.75241	204
c2.cgp	MARIADASON_RESPONSE_TO_CURCUMIN_SULINDAC_7	0.741718	0.782393	-0.277634	-0.80085	18
c2.cgp	MCDOWELL_ACUTE_LUNG_INJURY_UP	0.0207445	0.0514677	-0.422962	-1.51769	45
c2.cgp	SESTO_RESPONSE_TO_UV_C4	0.0166667	0.043015	0.555911	1.66239	20
c2.cgp	WANG_SMARCE1_TARGETS_DN	0.21413	0.317044	-0.224185	-1.08963	368
c2.cgp	SU_TESTIS	0.000212314	0.00131152	0.569202	2.30074	76
c2.cgp	TRAYNOR_RETT_SYNDROM_DN	0.500102	0.591227	-0.330822	-0.96893	19
c2.cgp	SESTO_RESPONSE_TO_UV_C6	0.507677	0.598451	0.275582	0.966653	38
c2.cgp	MCCLUNG_CREB1_TARGETS_DN	0.000774593	0.00337273	-0.474686	-1.78475	57
c2.cgp	RODWELL_AGING_KIDNEY_NO_BLOOD_DN	0.0167212	0.0430877	-0.320333	-1.40212	148
c2.cgp	INGRAM_SHH_TARGETS	0.00250627	0.00893728	-0.827052	-1.83588	7
c2.cgp	SUZUKI_RESPONSE_TO_TSA_AND_DECITABINE_1B	0.726781	0.772276	-0.268216	-0.826912	23
c2.cgp	SESTO_RESPONSE_TO_UV_C2	0.281173	0.386815	0.291668	1.10442	54
c2.cgp	KAAB_HEART_ATRIUM_VS_VENTRICLE_UP	0.000172622	0.00131152	-0.413157	-1.92752	248
c2.cgp	HU_GENOTOXIC_DAMAGE_24HR	0.00933063	0.0265084	0.478612	1.64644	35
c2.cgp	NIELSEN_GIST_VS_SYNOVIAL_SARCOMA_UP	0.00723787	0.0216145	0.616295	1.79377	18
c2.cgp	CUI_TCF21_TARGETS_UP	0.141412	0.231072	0.360839	1.25579	37
c2.cgp	HEDENFALK_BREAST_CANCER_BRACX_UP	0.624927	0.691678	0.300554	0.889014	19
c2.cgp	GEISS_RESPONSE_TO_DSRNA_DN	0.185567	0.281759	0.444299	1.25127	16
c2.cgp	VIETOR_IFRD1_TARGETS	0.00416667	0.0135842	0.601478	1.84335	22
c2.cgp	PAL_PRMT5_TARGETS_UP	0.000229095	0.00131152	0.458942	2.15276	203
c2.cgp	VARELA_ZMPSTE24_TARGETS_DN	0.156374	0.248586	-0.357609	-1.23544	38
c2.cgp	SATO_SILENCED_BY_METHYLATION_IN_PANCREATIC_CANCER_2	0.356111	0.458097	0.290331	1.05855	45
c2.cgp	ZHANG_RESPONSE_TO_CANTHARIDIN_UP	0.00592926	0.0182912	-0.598072	-1.75167	19
c2.cgp	HEDENFALK_BREAST_CANCER_BRACX_DN	0.26683	0.372738	-0.384211	-1.14218	20
c2.cgp	JIANG_AGING_HYPOTHALAMUS_DN	0.596592	0.668788	-0.262575	-0.917937	40
c2.cgp	CHANG_IMMORTALIZED_BY_HPV31_DN	0.160327	0.253026	-0.312487	-1.2039	64
c2.cgp	BROWNE_HCMV_INFECTION_24HR_DN	0.000181752	0.00131152	-0.473463	-2.07239	148
c2.cgp	MARIADASON_RESPONSE_TO_BUTYRATE_CURCUMIN_SULINDAC_TSA_8	0.74454	0.784039	0.287981	0.796202	15
c2.cgp	CHIBA_RESPONSE_TO_TSA_UP	0.0052519	0.016609	-0.452502	-1.67276	52
c2.cgp	RAMASWAMY_METASTASIS_DN	0.000388123	0.00191613	-0.480274	-1.82107	60
c2.cgp	MODY_HIPPOCAMPUS_NEONATAL	0.0997972	0.178832	0.384831	1.32383	35
c2.cgp	MCCLUNG_COCAINE_REWARD_5D	0.00564972	0.0175888	-0.389459	-1.55827	79
c2.cgp	KAYO_AGING_MUSCLE_UP	0.0825624	0.153834	-0.259767	-1.2045	238
c2.cgp	VISALA_RESPONSE_TO_HEAT_SHOCK_AND_AGING_UP	0.417522	0.514094	-0.374994	-1.03049	15
c2.cgp	CHUANG_OXIDATIVE_STRESS_RESPONSE_DN	0.0461808	0.0978639	0.605722	1.52295	11
c2.cgp	BROWNE_HCMV_INFECTION_14HR_DN	0.00137198	0.00542487	-0.308446	-1.46595	295
c2.cgp	DELASERNA_MYOD_TARGETS_DN	0.0927576	0.168229	-0.344693	-1.296	57
c2.cgp	YAMAZAKI_TCEB3_TARGETS_UP	0.0005386	0.00249465	-0.37459	-1.67221	173
c2.cgp	HU_GENOTOXIN_ACTION_DIRECT_VS_INDIRECT_24HR	0.00165153	0.00635352	0.454081	1.71941	54
c2.cgp	JIANG_VHL_TARGETS	0.00638485	0.019458	0.330759	1.46828	135
c2.cgp	MACLACHLAN_BRCA1_TARGETS_DN	0.0804361	0.151078	-0.507414	-1.41469	16
c2.cgp	LEE_AGING_CEREBELLUM_DN	0.0680106	0.132614	-0.323962	-1.31064	85
c2.cgp	EHRLICH_ICF_SYNDROM_UP	0.614991	0.683555	-0.333235	-0.88509	13
c2.cgp	BROWNE_INTERFERON_RESPONSIVE_GENES	0.000572628	0.00261522	-0.46695	-1.81521	68
c2.cgp	MCCLUNG_DELTA_FOSB_TARGETS_2WK	0.805463	0.832974	-0.221933	-0.806933	48
c2.cgp	CUI_TCF21_TARGETS_DN	0.000595238	0.00267367	-0.609851	-2.00067	30
c2.cgp	SU_THYMUS	0.64	0.703635	0.294804	0.881576	20
c2.cgp	KANG_FLUOROURACIL_RESISTANCE_DN	0.0147831	0.0391741	0.592364	1.66826	16
c2.cgp	NIELSEN_LIPOSARCOMA_DN	0.0180004	0.0458064	0.557201	1.64815	19
c2.cgp	BROWNE_HCMV_INFECTION_8HR_UP	0.127746	0.214881	-0.291202	-1.21617	104
c2.cgp	MARTINEZ_RESPONSE_TO_TRABECTEDIN_UP	0.22805	0.331728	-0.291457	-1.1374	69
c2.cgp	JI_RESPONSE_TO_FSH_DN	0.10136	0.181019	0.331086	1.27191	58
c2.cgp	WESTON_VEGFA_TARGETS_12HR	0.307708	0.412548	0.317889	1.09355	35
c2.cgp	KRASNOSELSKAYA_ILF3_TARGETS_UP	0.504157	0.59559	-0.280456	-0.968896	38
c2.cgp	CHUANG_OXIDATIVE_STRESS_RESPONSE_UP	0.252523	0.358399	-0.358273	-1.14966	27
c2.cgp	KEEN_RESPONSE_TO_ROSIGLITAZONE_UP	0.243577	0.348271	0.328096	1.14184	37
c2.cgp	NATSUME_RESPONSE_TO_INTERFERON_BETA_DN	0.320298	0.424726	0.287966	1.07754	51
c2.cgp	BAELDE_DIABETIC_NEPHROPATHY_UP	0.000188395	0.00131152	-0.651551	-2.63596	85
c2.cgp	LINDVALL_IMMORTALIZED_BY_TERT_UP	0.000566893	0.00259992	-0.476588	-1.89374	76
c2.cgp	WU_HBX_TARGETS_3_UP	0.147105	0.23743	0.443673	1.29134	18
c2.cgp	WANG_CISPLATIN_RESPONSE_AND_XPC_DN	0.000175285	0.00131152	-0.407576	-1.87958	226
c2.cgp	MURAKAMI_UV_RESPONSE_6HR_UP	0.16407	0.257443	0.353463	1.23012	37
c2.cgp	BROWNE_HCMV_INFECTION_20HR_DN	0.000185598	0.00131152	-0.462561	-1.92245	101
c2.cgp	SIMBULAN_PARP1_TARGETS_UP	0.000198373	0.00131152	-0.646776	-2.13763	31
c2.cgp	ULE_SPLICING_VIA_NOVA2	0.0567223	0.115206	-0.392441	-1.39225	43
c2.cgp	MARIADASON_REGULATED_BY_HISTONE_ACETYLATION_DN	0.78956	0.819899	0.219635	0.828535	53
c2.cgp	IVANOVA_HEMATOPOIESIS_STEM_CELL	0.000172622	0.00131152	-0.340081	-1.58659	248
c2.cgp	KUNINGER_IGF1_VS_PDGFB_TARGETS_DN	0.198527	0.29779	-0.330752	-1.18682	45
c2.cgp	MEDINA_SMARCA4_TARGETS	0.0170756	0.0437938	-0.438826	-1.5568	43
c2.cgp	KANG_FLUOROURACIL_RESISTANCE_UP	0.515316	0.605057	-0.314261	-0.958869	22
c2.cgp	MAHAJAN_RESPONSE_TO_IL1A_DN	0.00245654	0.00879833	-0.417865	-1.66041	76
c2.cgp	RUAN_RESPONSE_TO_TNF_DN	0.000753296	0.00328999	-0.452545	-1.82699	84
[truncated: 13,332 more rows]

## Sheet: S4_SQ_TvsN_fgsea
library	pathway	pval	padj	ES	NES	size
c1.all	chr5q23	0.00882699	0.0752617	-0.437303	-1.59549	57
c1.all	chr16q24	0.68553	0.816587	-0.22932	-0.891662	82
c1.all	chr8q24	0.000209336	0.00616591	0.493634	2.1375	148
c1.all	chr13q11	0.431772	0.643977	-0.385918	-1.01694	14
c1.all	chr7p21	0.380579	0.590194	0.315078	1.04564	35
c1.all	chr10q23	0.240062	0.501383	-0.285061	-1.12338	89
c1.all	chr13q13	0.126783	0.368224	-0.415629	-1.30281	28
c1.all	chr10q21	0.217249	0.472408	0.333451	1.16348	44
c1.all	chr1p13	0.00833656	0.0730013	-0.370075	-1.5001	105
c1.all	chrxp21	0.0525692	0.207712	-0.449347	-1.44331	31
c1.all	chr4q12	0.680774	0.816587	0.257986	0.874342	38
c1.all	chr6q13	0.529773	0.736679	0.353191	0.942875	15
c1.all	chr2p22	0.28554	0.536668	0.319167	1.10867	43
c1.all	chr18q23	0.442547	0.651751	-0.350241	-1.00794	20
c1.all	chr8p11	0.768839	0.889657	0.238168	0.827305	43
c1.all	chr1p11	0.245607	0.506858	0.672813	1.20849	4
c1.all	chr9p12	0.643016	0.809941	-0.319851	-0.8719	16
c1.all	chr20p12	0.0401704	0.17661	0.419482	1.4505	42
c1.all	chr7p13	0.286288	0.536668	0.328042	1.10532	37
c1.all	chr4p16	0.11307	0.353632	-0.296426	-1.21979	113
c1.all	chr8q22	0.00653728	0.0622965	0.410119	1.57475	70
c1.all	chr14q11	0.994447	0.999801	-0.161444	-0.697866	162
c1.all	chryp11	0.298075	0.539532	0.372648	1.11822	23
c1.all	chr10q25	0.259259	0.521152	-0.325277	-1.13174	45
c1.all	chr11q	0.263419	0.521152	-0.553794	-1.19608	7
c1.all	chr4p14	0.395784	0.596437	-0.333441	-1.0361	27
c1.all	chr15q26	0.0371504	0.171953	0.367184	1.39784	67
c1.all	chr12q15	0.19521	0.436192	-0.397811	-1.21146	25
c1.all	chr4p12	0.816481	0.918541	0.263091	0.761646	20
c1.all	chr9q12	0.908913	0.969581	0.284457	0.629363	8
c1.all	chr2q22	0.258338	0.521152	-0.427034	-1.16408	16
c1.all	chr9q33	0.303666	0.543579	-0.296726	-1.08939	59
c1.all	chr18p	0.134655	0.379376	-0.855245	-1.29967	2
c1.all	chr3q28	0.000397614	0.0104587	0.685954	2.03388	22
c1.all	chr12q14	0.663832	0.815084	0.259939	0.88496	39
c1.all	chr2q36	0.0919089	0.300793	-0.382126	-1.31795	43
c1.all	chr9q22	0.80226	0.908854	-0.214363	-0.838873	85
c1.all	chr3p22	0.000196928	0.00616591	-0.655172	-2.37362	55
c1.all	chrxq	0.725969	0.852224	0.568064	0.847444	2
c1.all	chr6p11	0.160405	0.398774	-0.611219	-1.3201	7
c1.all	chr12q24	0.341268	0.558439	0.2275	1.03949	221
c1.all	chr2q32	0.667617	0.815084	0.253312	0.879909	43
c1.all	chr4q35	0.00019755	0.00616591	-0.570567	-1.94778	41
c1.all	chr3p14	0.00019755	0.00616591	-0.614302	-2.09709	41
c1.all	chr22q	0.233229	0.493897	0.603473	1.22255	6
c1.all	chr15q24	0.827492	0.924366	-0.215641	-0.816161	70
c1.all	chr2p	0.0288536	0.155809	0.684718	1.57208	9
c1.all	chr13q31	0.831256	0.924366	0.276343	0.737723	15
c1.all	chr12q22	0.784606	0.896015	-0.256875	-0.798184	27
c1.all	chr7p	0.0872353	0.294419	0.8169	1.34664	3
c1.all	chr11q22	0.331047	0.555379	-0.300812	-1.076	51
c1.all	chrxq28	0.00208073	0.0306435	0.406096	1.64467	97
c1.all	chr16q22	0.0475554	0.192599	-0.308877	-1.31184	139
c1.all	chr11q24	0.0120031	0.0948541	-0.394185	-1.51169	76
c1.all	chr5q12	0.17497	0.410798	0.354469	1.20679	39
c1.all	chr10p11	0.117982	0.357612	-0.409507	-1.30885	30
c1.all	chr5q21	0.138594	0.382694	-0.419072	-1.28781	26
c1.all	chr14q21	0.331781	0.555379	0.311476	1.07032	41
c1.all	chrxq12	0.59814	0.79101	-0.334083	-0.897497	15
c1.all	chr1p35	0.857913	0.939067	-0.203135	-0.812998	96
c1.all	chr3p12	0.0471621	0.192599	-0.595732	-1.5318	13
c1.all	chr4q21	0.0261107	0.148419	-0.365577	-1.4286	84
c1.all	chr10p15	0.634949	0.809941	-0.258759	-0.900304	45
c1.all	chr18q21	0.148784	0.391919	0.311923	1.20365	72
c1.all	chr1p33	0.932859	0.979022	-0.207008	-0.700032	39
c1.all	chr11q12	0.665646	0.815084	-0.21455	-0.916438	148
c1.all	chr17q22	0.275617	0.531547	-0.3559	-1.12576	29
c1.all	chr1p31	0.0300078	0.159386	-0.362226	-1.4155	84
c1.all	chr10p13	0.158084	0.398774	-0.414073	-1.26099	25
c1.all	chr14q13	0.0368463	0.171953	-0.482364	-1.512	28
c1.all	chr2q24	0.336033	0.555483	-0.31532	-1.07643	41
c1.all	chr22q13	0.000208247	0.00616591	0.405036	1.80032	177
c1.all	chr15q11	0.909731	0.969581	0.217235	0.720931	35
c1.all	chr1q43	0.185081	0.419344	-0.438099	-1.23081	18
c1.all	chr19p	0.315574	0.549709	-0.634679	-1.16576	4
c1.all	chr3q24	0.55117	0.750333	0.330114	0.92961	18
c1.all	chr22q11	0.00336629	0.0389528	0.345424	1.50395	154
c1.all	chr7p11	0.0363996	0.171953	0.564996	1.53481	16
c1.all	chr16q13	0.235955	0.496425	-0.336336	-1.15406	42
c1.all	chr1p22	0.0902669	0.300677	-0.337314	-1.28608	73
c1.all	chr12p	0.639398	0.809941	-0.438632	-0.858959	5
c1.all	chr2q11	0.633504	0.809941	0.242959	0.909293	61
c1.all	chr9p21	0.0316206	0.16262	-0.474035	-1.52261	31
c1.all	chr4q33	0.660622	0.815084	-0.429659	-0.841389	5
c1.all	chr2p11	0.168963	0.408537	0.33206	1.20526	52
c1.all	chr2q34	0.0171336	0.11714	-0.596339	-1.65109	17
c1.all	chr17q23	0.355869	0.57364	-0.279811	-1.05041	67
c1.all	chr14q23	0.368026	0.584512	0.303527	1.04955	42
c1.all	chr5q33	0.0105986	0.0858489	-0.428852	-1.56008	56
c1.all	chr6q27	0.949682	0.992571	-0.201978	-0.66645	35
c1.all	chr3q26	0.0010202	0.0173971	0.480501	1.78558	59
c1.all	chr10q11	0.0403368	0.17661	-0.368899	-1.39621	70
c1.all	chr5p12	0.113511	0.353632	0.520961	1.36668	14
c1.all	chr1q21	0.000632911	0.0128165	0.338777	1.54625	220
c1.all	chr4q24	0.840556	0.929489	-0.264436	-0.732146	17
c1.all	chr7q31	0.0332426	0.165811	-0.354529	-1.39362	87
c1.all	chr6p21	0.85648	0.939067	-0.187224	-0.881312	335
c1.all	chr17q	0.602822	0.79396	0.375432	0.893341	10
c1.all	chr5q15	0.199116	0.441874	-0.417499	-1.21787	21
c1.all	chr2q13	0.0457768	0.19015	0.462887	1.46512	29
c1.all	chr1q23	0.267147	0.521152	-0.280145	-1.10401	89
c1.all	chr6q23	0.0636417	0.237011	-0.385778	-1.36782	49
c1.all	chr11q14	0.565642	0.758869	0.273232	0.933048	40
c1.all	chr5p14	0.933697	0.979022	-0.234109	-0.638172	16
c1.all	chr5q31	0.000190585	0.00616591	-0.375829	-1.66948	199
c1.all	chr2p24	0.0305483	0.159639	0.409294	1.46191	48
c1.all	chr9p11	0.673693	0.815084	-0.335494	-0.843139	12
c1.all	chr4q26	0.041289	0.177898	-0.532228	-1.51211	19
c1.all	chr1q25	0.383009	0.590194	0.269976	1.03358	69
c1.all	chrxq11	0.437862	0.647797	-0.425534	-1.02015	10
c1.all	chr5q14	0.168736	0.408537	-0.35571	-1.22054	42
c1.all	chr4q28	0.127287	0.368224	-0.387375	-1.27819	35
c1.all	chr1q42	0.000206654	0.00616591	0.445348	1.77978	88
c1.all	chr6p25	0.433293	0.643977	0.297109	1.00693	38
c1.all	chr13q34	0.0909455	0.300677	-0.404362	-1.34022	36
c1.all	chr8q12	0.31121	0.547873	0.336841	1.09499	32
c1.all	chr4q22	0.00176678	0.0286219	-0.566413	-1.81035	30
c1.all	chr7q22	0.00187344	0.0289045	0.38579	1.60488	114
c1.all	chr6p23	0.0824431	0.281174	-0.508776	-1.40865	17
c1.all	chr8p21	0.00649223	0.0622965	-0.408215	-1.57483	79
c1.all	chr5q35	0.61995	0.809935	0.22493	0.930916	110
c1.all	chr13q32	0.971252	0.99884	0.195013	0.603692	26
c1.all	chr12q12	0.00550908	0.0594981	0.442372	1.64389	59
c1.all	chr3p24	0.039115	0.17661	-0.425514	-1.45261	41
c1.all	chr7q33	0.362189	0.580937	0.364297	1.0661	21
c1.all	chr12p12	0.783712	0.896015	0.226289	0.830273	55
c1.all	chr9p23	0.220346	0.474554	-0.740082	-1.25021	3
c1.all	chr7p14	0.898799	0.967478	-0.211023	-0.741537	47
c1.all	chr6q21	0.633361	0.809941	0.245639	0.90689	57
c1.all	chryq11	0.549879	0.750333	-0.316686	-0.935851	22
c1.all	chr15q13	0.172779	0.410798	0.385628	1.22883	30
c1.all	chr3q22	0.280567	0.536668	0.321885	1.10609	41
c1.all	chr6q15	0.327269	0.555379	-0.402687	-1.09771	16
c1.all	chr4q31	0.0131192	0.0968003	-0.399755	-1.513	70
c1.all	chr3q12	0.141238	0.382694	0.393104	1.26514	31
c1.all	chr13q22	0.0104818	0.0858489	-0.620341	-1.71754	17
c1.all	chr15q15	0.776158	0.894929	-0.221221	-0.846783	75
c1.all	chr3p26	0.00100442	0.0173971	-0.669529	-1.9268	20
c1.all	chr17q12	0.128864	0.369486	0.299591	1.20547	93
c1.all	chr11p12	0.966517	0.99884	-0.218494	-0.561813	13
c1.all	chr7p12	0.749403	0.870274	0.278821	0.807186	20
c1.all	chr6q	0.290153	0.539532	0.610074	1.17079	5
c1.all	chrxq21	0.964518	0.99884	-0.190943	-0.655179	42
c1.all	chr16p12	0.30203	0.543579	-0.277121	-1.08027	83
c1.all	chr1q32	0.0821084	0.281174	0.28584	1.23208	144
c1.all	chr8p23	0.00294291	0.0366732	-0.476842	-1.69722	50
c1.all	chrxq23	0.865503	0.944185	0.257496	0.711594	17
c1.all	chr2p15	0.0272997	0.149917	0.591833	1.57995	15
c1.all	chr18q12	0.251676	0.516095	0.318498	1.12985	47
c1.all	chr17p13	0.000190295	0.00616591	-0.397382	-1.78682	221
c1.all	chr14q	0.189415	0.426183	0.599508	1.27473	7
c1.all	chr11p14	0.694089	0.823755	0.280411	0.850241	24
c1.all	chr1q	0.968331	0.99884	0.320064	0.527619	3
c1.all	chr9q32	0.18083	0.412598	-0.376671	-1.21965	32
c1.all	chr20q12	0.704247	0.829731	-0.248887	-0.863104	44
c1.all	chr14q32	0.649108	0.812012	0.215743	0.927744	141
c1.all	chr7p22	0.0724667	0.253233	0.342337	1.31061	69
c1.all	chr5q	0.119204	0.357612	-0.670244	-1.3809	6
c1.all	chr21q21	0.224169	0.477834	-0.419795	-1.19268	19
c1.all	chr2p13	0.00715308	0.0643777	0.406258	1.56767	72
c1.all	chr16q12	0.555893	0.753596	0.275584	0.938223	39
c1.all	chr3p	0.265445	0.521152	-0.717827	-1.21262	3
c1.all	chr10q22	0.0130418	0.0968003	-0.370032	-1.47257	93
c1.all	chr17p11	0.698061	0.825445	-0.227694	-0.885341	82
c1.all	chr15q22	0.178784	0.410822	0.295412	1.16369	81
c1.all	chr10q	0.136196	0.380409	0.784189	1.29272	3
c1.all	chr1q31	0.0422783	0.177898	-0.412652	-1.43102	44
c1.all	chr10q24	0.207851	0.458121	0.276661	1.12964	101
c1.all	chr13q14	0.00373869	0.0417701	-0.422631	-1.62078	76
c1.all	chr11p	0.517576	0.729107	0.510807	0.980289	5
c1.all	chr14q12	0.51278	0.725505	0.317163	0.961676	24
c1.all	chr4q	0.508551	0.725505	-0.494005	-0.967395	5
c1.all	chr1p34	0.391605	0.595682	0.234106	1.02272	156
c1.all	chr2q23	0.173956	0.410798	0.419923	1.24509	22
c1.all	chr6q16	0.354367	0.57364	0.349546	1.07176	25
c1.all	chr16q21	0.527468	0.736637	0.327089	0.946921	20
c1.all	chr9q13	0.00285831	0.0366732	-0.720082	-1.85154	13
c1.all	chr15q25	0.6714	0.815084	0.243196	0.888742	54
c1.all	chr18q22	0.118165	0.357612	-0.427668	-1.31422	26
c1.all	chr2q21	0.567232	0.758869	-0.260222	-0.938897	54
c1.all	chr3p25	0.00236128	0.0332632	-0.42971	-1.64793	76
c1.all	chr20p13	0.329655	0.555379	0.275795	1.06424	72
c1.all	chr8q21	0.83307	0.924366	-0.221034	-0.794478	53
c1.all	chr4p15	0.0254453	0.147219	-0.427948	-1.48406	44
c1.all	chr12p11	0.328144	0.555379	0.321818	1.07869	36
c1.all	chr9p13	0.890659	0.961912	-0.205035	-0.76382	64
c1.all	chr2q37	0.382562	0.590194	0.246341	1.02784	116
c1.all	chr3q29	0.000203666	0.00616591	0.633433	2.23509	46
c1.all	chr16p	0.7349	0.85675	0.416558	0.799416	5
[truncated: 15,138 more rows]

## Sheet: S5_AD_HR
EntrezID	Symbol	HR	z	pv	p.adj
[truncated: 22,770 more rows]

## Sheet: S6_SQ_HR
EntrezID	Symbol	HR	z	pv	p.adj
[truncated: 22,970 more rows]

[truncated: 2 more sheets: S7_AD_Survival_fgsea, S8_SQ_Survival_fgsea]
